# Supplementary material for: The switch-off method: rapid investigation of flow photochemical reactions
Source: Royal Society of Chemistry journal article supplement (doi:10.1039/d3re00261f), 2023-01-01
Supplement: d3re00261f1.pdf [file d3re00261f1.pdf]

# The Switch-Off Method: Rapid Investigation of Flow Photochemical Reactions

Dawid Drelinkiewicz, Stephen T. Alston, Thomas Durand, and Richard J. Whitby

## Supporting Information

### Table of contents

|                                                                                                                                               |    |
|-----------------------------------------------------------------------------------------------------------------------------------------------|----|
| 1. Materials and methods .....                                                                                                                | 1  |
| 1. 1. Materials .....                                                                                                                         | 1  |
| 1. 2. Methods .....                                                                                                                           | 1  |
| 1. 3. Inhomogeneity of the light and effective exposure time .....                                                                            | 2  |
| 1. 3. 1. Correction by light source output amendment .....                                                                                    | 2  |
| 1. 3. 2. Correction by exclusion of start- and endpoint data .....                                                                            | 4  |
| 1. 3. 3. Comparison of both methods .....                                                                                                     | 5  |
| 2. Experimental procedures .....                                                                                                              | 9  |
| 2. 1. General procedure for switch off experiment performed herein: .....                                                                     | 9  |
| 2. 2. [2+2] photocycloaddition of 3,4-dihydro-2 <i>H</i> -pyran an diphenylacetylene .....                                                    | 9  |
| 2. 2. 1. Calibration curve for determination of reaction product yield using GC-FID monitoring:10                                             |    |
| 2. 2. 2. Diphenylacetylene and 3,4-dihydro-2 <i>H</i> -pyran [2+2] photoreaction Switch-Off<br>optimisations results:.....                    | 12 |
| 2. 2. 3. Validation of Switch-Off results obtained in [2+2] photocycloaddition of 3,4-dihydro-2 <i>H</i> -<br>pyran an diphenylacetylene..... | 20 |
| 2. 3. [2+2] photocycloaddition of cyclohex-2-enone and 1,1,2,2-tetramethylethylene .....                                                      | 20 |
| 2. 3. 1. Calibration curve for determination of compounds 5 and 6 yields using GC-FID<br>monitoring: .....                                    | 21 |
| 2. 3. 2. Cyclohex-2-enone and tetramethylethylene [2+2] photoreaction Switch-Off<br>optimisations results.....                                | 23 |
| 2. 3. 3. Validation of Switch-Off results obtained in [2+2] photocycloaddition cyclohex-2-enone<br>and tetramethylethylene .....              | 37 |
| 2. 4. Mallory photocyclization of <i>cis</i> -stilbene .....                                                                                  | 37 |
| 2. 4. 1. Calibration curve for determination of phenanthrene yield using GC-FID monitoring: ...                                               | 38 |
| 2. 4. 2. Mallory photoreaction Switch-Off optimisations results.....                                                                          | 40 |

|                                                                                                                                                                                             |     |
|---------------------------------------------------------------------------------------------------------------------------------------------------------------------------------------------|-----|
| 2. 4. 3. Validation of Switch-Off results obtained in Mallory photocyclisation of <i>cis</i> -stilbene .....                                                                                | 67  |
| 3. Syntheses and characterization data .....                                                                                                                                                | 68  |
| 3. 1. Procedures for synthesis of compounds 1, 2, 3, and 4: .....                                                                                                                           | 68  |
| 3. 1. 1. <i>cis</i> -7,8-Diphenyl-2-oxabicyclo[4.2.0]oct-7-ene (1): .....                                                                                                                   | 68  |
| 3. 1. 2. 3,4-Dihydro-6,7-diphenyl-2 <i>H</i> -oxocin (2): .....                                                                                                                             | 68  |
| 3. 1. 3. <i>cis</i> -8 <i>c</i> ,11,12,12 <i>a</i> -Tetrahydro-10 <i>H</i> -phenanthro[9',10':3,4]cyclobuta[1,2- <i>b</i> ]pyran (3): .....                                                 | 69  |
| 3. 1. 4. (5 <i>α</i> ,6 <i>β</i> ,7 <i>α</i> ,12 <i>α</i> ,13 <i>β</i> ,14 <i>α</i> )-1,11-Dioxa-6,13-diphenyltetracyclo[6.6.0.0 <sup>5,14</sup> ,0 <sup>7,12</sup> ]tetradecane (4): ..... | 70  |
| 3. 2. Procedure for synthesis of compounds 5, 6, 7, 8, and 9: .....                                                                                                                         | 73  |
| 3. 2. 1. <i>trans</i> -7,7,8,8-Tetramethylbicyclo[4.2.0]octan-2-one (5): .....                                                                                                              | 73  |
| 3. 2. 2. <i>cis</i> -7,7,8,8-Tetramethylbicyclo[4.2.0]octan-2-one (6): .....                                                                                                                | 73  |
| 3. 2. 3. Structural assignment of the <i>trans</i> - and <i>cis</i> -bicyclo[4.2.0]octan-2-ones 5 and 6: .....                                                                              | 74  |
| 3. 2. 4. <i>cis-anti-cis</i> -Tricyclo[6.4.0.0 <sup>2,7</sup> ]dodecane-3,12-dione (7): .....                                                                                               | 75  |
| 3. 2. 5. <i>cis-anti-cis</i> -Tricyclo[6.4.0.0 <sup>2,7</sup> ]dodecane-3,9-dione (8): .....                                                                                                | 76  |
| 3. 2. 6. 3-(1,1,2-Trimethyl-2-propen-1-yl)cyclohexanone (9): .....                                                                                                                          | 76  |
| 3. 3. Procedure for synthesis of compounds 10, 11, 12, and 13: .....                                                                                                                        | 76  |
| 3. 3. 1. Phenanthrene (10): .....                                                                                                                                                           | 77  |
| 3. 3. 2. (1 <i>α</i> ,2 <i>α</i> ,3 <i>β</i> ,4 <i>β</i> )-1,2,3,4-Tetraphenylcyclobutane (11): .....                                                                                       | 77  |
| 3. 3. 3. (1 <i>α</i> ,2 <i>β</i> ,3 <i>α</i> ,4 <i>β</i> )-1,2,3,4-Tetraphenylcyclobutane (12): .....                                                                                       | 77  |
| 3. 3. 4. (1 <i>α</i> ,2 <i>β</i> ,2 <i>aR</i> ,10 <i>bS</i> )-1,2-Diphenyl-1,2,2 <i>a</i> ,10 <i>b</i> -tetrahydrocyclobuta[ <i>l</i> ]phenanthrene (13): .....                             | 77  |
| 4. NMR, UV-Vis, IR, and MS spectra .....                                                                                                                                                    | 78  |
| 5. References .....                                                                                                                                                                         | 115 |

# 1. Materials and methods

## 1. 1. Materials

Acetonitrile was distilled from CaH<sub>2</sub> and was stored in a closed RBF containing freshly dried 3Å molecular sieves. All other solvents and commercially available chemicals were used as received.

## 1. 2. Methods

NMR spectra were obtained on a Bruker DPX400 or Bruker AvanceCore AVII 400 spectrometers. <sup>1</sup>H chemical shifts are reported as values in ppm referenced to the deuterated solvent main peak. The following abbreviations are used to assign multiplicity: s = singlet, d = doublet, t=triplet, q = quartet, qu = quintet, sx = sextet, hpt = heptet, oct = octet, br = broad. Coupling constants, J, are measured in Hertz (Hz) and if indicated are reported as <sup>X</sup>J<sub>Y-Z</sub>, where X indicates number of bonds between coupled nuclei and Y-Z indicates the nuclei. <sup>13</sup>C chemical shifts are reported as values in ppm referenced to the main peak of deuterated solvent and are proton decoupled. If indicated, in the <sup>13</sup>C NMR spectra the nature of carbons (CH, CH<sub>2</sub> or CH<sub>3</sub>) was determined by DEPT-135 experiment. Two-dimensional NMR (HSQC, HMBC, NOESY, COSY, and TOCSY) was used for signals assignment. Chloroform-d<sub>1</sub> was passed through K<sub>2</sub>CO<sub>3</sub> directly prior to the measurement.

High resolution positive/negative ion electrospray ionisation (ESI) mass spectra were recorded using a MaXis (Bruker Daltonics, Bremen, Germany) time of flight (TOF) mass spectrometer. Samples were introduced to the mass spectrometer via a Dionex Ultimate 3000 autosampler and uHPLC pump. Ultrahigh performance liquid chromatography was performed using a Waters, Acquity UPLC BEH C18 (50 mm x 2.1 mm 1.7µm) column. Gradient elution from 5% acetonitrile (0.2% formic acid) to 100% acetonitrile (0.2% formic acid) was performed in five minutes at 0.6 mL/min. High resolution electron ionization mass spectra were recorded using LECO Pegasus High-Resolution Gas Chromatography Time-of-Flight Mass Spectrometer.

Analytical HPLC measurement of Mallory photoreactions were performed on an Agilent 1100 series HPLC using Cosmosil Buckyprep column (4.6 mm I.D. x 250 mm, 5 µm particle size, pyrenylpropyl bonded silica as stationary phase) and *n*-hexane:toluene 9:1 (v/v) as eluent with 1.0 mL·min<sup>-1</sup> flow rate at 30 °C. Preparative HPLC separations of Mallory photoreactions were performed on a Shimadzu Prominence modular preparative HPLC system, using Cosmosil Buckyprep column (2 columns connected in series, 20 mm I.D. x 250 mm, 5 µm particle size, pyrenylpropyl bonded silica as stationary phase) and *n*-hexane:toluene 9:1 (v/v) as eluent with 10.0 mL·min<sup>-1</sup> flow rate at 30 °C.

GC measurements were performed on a Hewlett Packard HP 6890 series GC system, using a HP-5 (cross-linked 5% Ph Me siloxane) 30 m column, with a film thickness of 0.25 µm and 0.32 mm internal diameter. The carrier gas was helium and the flow rate was 2.7 mL·min<sup>-1</sup>. The injector was maintained at 300 °C with 1.0 µL injection. The run started at 80 °C with a gradient of 25 °C/min until 275 °C which was held for 3 min.

Infrared spectra were run as neat films on a Thermo Nicolet 380 FT-IR spectrometer with a Smart Orbit Goldengate ATR attachment.

UV-Vis measurements were recorded with the Ocean Optics DH-2000-BAL light source and USB 2000+ fibre optic spectrometer at room temperature using SpectraSuite Software. All flow *in situ* UV-Vis measurements were performed with a Type 583-F Starna® fluorimeter flow cell (path length: 1 mm, volume: 0.011 mL). The other UV-Vis measurements were run with UV Fused Quartz cuvette (path

length: 10 mm, volume: 3.5 mL). The wavelengths are given in nanometres and the corresponding extinction coefficients in  $M^{-1}\cdot cm^{-1}$ .

Melting points were recorded on a Gallenkamp or Stuart SMP20 melting point apparatus and are uncorrected.

Thin-layer chromatography was carried out on Merck silica gel plates, which were visualised under UV irradiation of 254 nm and/or by staining with aqueous  $KMnO_4$ , methanolic  $H_2SO_4$ , PMA or iodine. Column chromatography was performed with Merck silica gel 60 using solvent ratios as volumes before mixing described in the method.

The Vapourtec® R series Integrated Flow Chemistry System (R2+) was the platform used for the flow experiments.

### 1. 3. Inhomogeneity of the light and effective exposure time

During a photoflow chemical reaction, the intensity of the light is not homogeneous throughout the whole photoreactor volume. Indeed, the photon flux is higher in the middle of the reactor than at the entrance and the end. With the switch-off method this means that the total exposure of each fraction of the reaction mixture as it leaves the reactor is not exactly the time it was in the reactor before the light was switched off (multiplied by average light intensity). The difference is specific for each photoreactor and varies for various designs and light sources used.

#### 1. 3. 1. Correction by light source output amendment

To assess this difference of light irradiation intensity, the reaction between the cyclohex-2-enone and the tetramethylethylene was used as a model (Scheme S 1. [2+2] photocycloaddition used as a model reaction for determination of light irradiation efficiency). The reaction mixture was injected into the photoreactor (light source turned off), then once the reactor was entirely filled up, the pump was turned off, the light source was turned on, and the reaction was left to proceed. After the indicated reaction time the light was turned off and the content of the photoreactor was eluted and analysed.

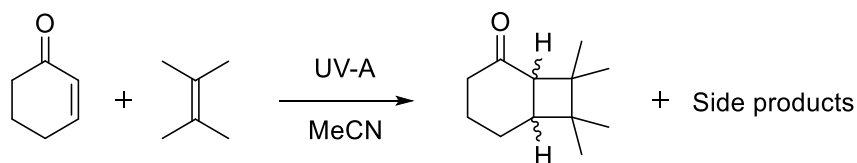

*Scheme S 1. [2+2] photocycloaddition used as a model reaction for determination of light irradiation efficiency*

Experimental procedure for determination of light source efficiency:

In a 50 mL flask, cyclohex-2-enone (98.0 mg, 98.7  $\mu L$ , 1.02 mmol, 1.00 equiv.) was mixed with tetramethylethylene (1.68 g, 2.38 mL, 20.0 mmol, 19.6 equiv.), dibutyl ether (115.5 mg, 150.0  $\mu L$ , 0.89 mmol, 0.87 eq.) acting as an internal standard, and anhydrous MeCN (37.5 mL, 382.7 vol.). The reaction mixture was degassed by sonication whilst being saturated with nitrogen for 15 minutes. The reaction mixture was injected into the photoflow reactor (UV lamp switched off) until it was entirely filled up. Then, the pump was turned off, the water cooling system was turned on, the UV-A lamp (Philips PL-L 36W/09/4P) was switched on and the reaction was left to proceed for 60 minutes. Once the time has passed, the UV lamp was turned off, the feeding valve was returned to the stock solvent, the content of the UV reactor was pushed out (1 mL/min) and it was collected in GC vials. The sampling rate was precisely determined (30 seconds collection per vial with addition of 1 mL of MeCN).

The samples were then analysed via off-line GC measurements. Light output at each point was calculated as inversion of the ratio of the peak area of cyclohex-2-enone to the peak area of internal standard, which was then normalised to the arithmetic mean value of all datapoints, which was set as 100% (Figure S 1. Graph of relative light output at each point obtained from [2+2] photocycloaddition experiment between cyclohex-2-enone and tetramethylethylene using UV-A light source and 31.8 mL photoreactor..

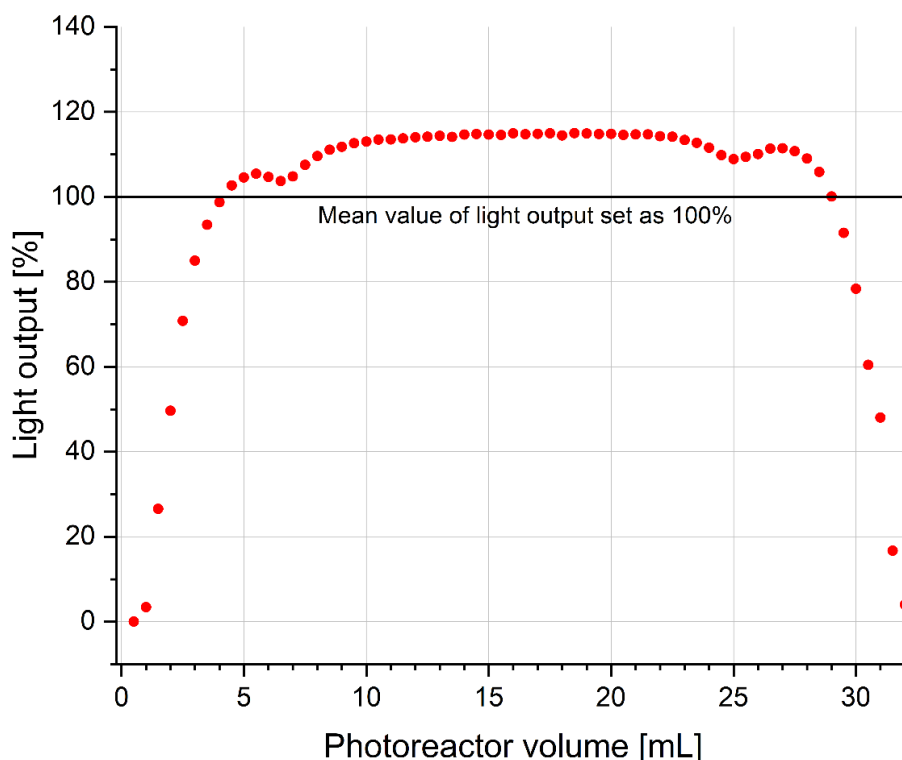

Figure S 1. Graph of relative light output at each point obtained from [2+2] photocycloaddition experiment between cyclohex-2-enone and tetramethylethylene using UV-A light source and 31.8 mL photoreactor.

In general, reaction time in flow reactions (described as residence time) is determined by the total flow rate and reactor volume, by the equation given below:

$$Rt = \frac{V_{reactor}}{FR}$$

where: Rt – reaction/residence time  
 $V_{reactor}$  – reactor internal volume  
 FR – total flow rate

In thermal reactions, the flow reaction time is often corrected for the thermal expansion of liquids, but in experiments described herein this step is omitted, due to the experiments being performed at room temperatures. In flow photoreactions, previously discussed light irradiation intensity takes crucial part as it effectively changes the total light exposure for a given reaction time at each point of the photoreactor, accordingly to the determined light source output.

The effective exposure time for each fraction of the photoreactor can then be calculated as a residence time of a fraction in the photoreactor before the light was switched off multiplied by an arithmetic mean of a sum of light outputs of all previous and current fractions, as described in equation below:

$$EET_{fraction\ n} = Rt_{fraction\ n} \cdot \left( \sum_{i=1}^n \frac{LightOutput\%_{fraction\ i}}{n \cdot 100} \right)$$

where:  $EET_{fraction\ n}$  – effective exposure time for fraction n

$Rt_{fraction\ n}$  – residence time in photoreactor for fraction n before the light was switched off

$LightOutput\%_{fraction\ n}$  – output of UV light source for fraction n [%]

In order to convert the effective exposure time back to residence time, that could be further used in calculation of the flow rate needed in the experimental procedure, a following equation can be used:

$$Rt_{fraction\ n} = \frac{EET_{fraction\ n}}{\left( \sum_{i=1}^n \frac{LightOutput\%_{fraction\ i}}{n \cdot 100} \right)}$$

Flow rate for the experimental procedure can then be calculated using the following equation:

$$FR = \frac{V_{reactor}}{Rt}$$

Note that the multiplication or division by 100 in formulas presented above comes from the fact that *Light Output* values used herein are in percent. This correction method has been used in the analysis of results obtained from experiments utilizing UV-A light source.

### 1. 3. 2. Correction by exclusion of start- and endpoint data

A different approach would be to only use approximately 90% of the data from the region where the light irradiation intensity is relatively homogeneous, i.e. the central portion of the data. In an example below (Figure S 2. Graph of relative light output at each point obtained from [2+2] photocycloaddition experiment between cyclohex-2-enone and tetramethylethylene using UV-A light source and 31.8 mL photoreactor, with the datapoints excluded from Switch-Off calculations due to light irradiation inhomogeneity (blue points and area) and with datapoints included in the analysis of results (red points and area).), where UV-A lamp was used, only the datapoints laying in the red area would be used for analysis, which results in restricting the range of reactor volume used down to effective photoreactor volume. In the example below, the effective total photoreactor volume used in data analysis would be 28.5 mL (datapoints included in the analysis start at 2.0 mL and end at 30.5 mL) out of total internal photoreactor volume of 31.8 mL.

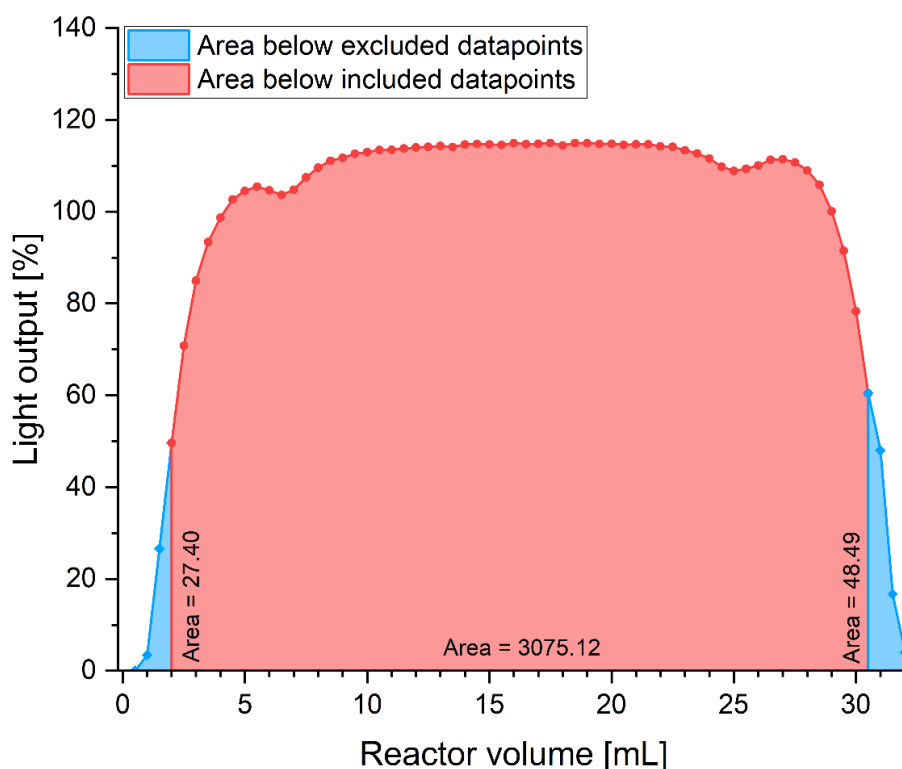

Figure S 2. Graph of relative light output at each point obtained from [2+2] photocycloaddition experiment between cyclohex-2-enone and tetramethylethylene using UV-A light source and 31.8 mL photoreactor, with the datapoints excluded from Switch-Off calculations due to light irradiation inhomogeneity (blue points and area) and with datapoints included in the analysis of results (red points and area).

Such approach minimizes the error caused by the uneven light irradiation intensity without the need for measurement of the light source output, but also results in slight overestimation of the results for the first few datapoints, i.e. the first datapoint analysed for which a set reaction time of zero would be assumed, had actually experienced slight irradiation, thus would show positive reaction output (e.g. conversion or yield). Table S 1. Values of areas from the Figure S 2. obtained from integration of datapoints. contains values of the areas generated by the curves obtained from excluded and included datapoints from the Figure S 2. Graph of relative light output at each point obtained from [2+2] photocycloaddition experiment between cyclohex-2-enone and tetramethylethylene using UV-A light source and 31.8 mL photoreactor, with the datapoints excluded from Switch-Off calculations due to light irradiation inhomogeneity (blue points and area) and with datapoints included in the analysis of results (red points and area). Analysis of the areas shows, that by using the central 90% of the datapoints obtained in experiment, only approx. 2.4% of the data is excluded from analysis, for this particular example.

Table S 1. Values of areas from the Figure S 2. obtained from integration of datapoints.

|                                    | Area value | Percentage of total area [%] |
|------------------------------------|------------|------------------------------|
| Total area                         | 3151.01    | 100.0                        |
| Excluded datapoints area           | 75.89      | 2.4                          |
| Reactor inlet excluded datapoints  | 27.40      | 0.9                          |
| Reactor outlet excluded datapoints | 48.49      | 1.5                          |
| Included datapoints area           | 3075.12    | 97.6                         |

The datapoints exclusion methodology has been used in the experiments performed with UV-B and UV-C light sources performed herein.

### 1. 3. 3. Comparison of both methods

In order to compare both light intensity inhomogeneity correction methodologies, experimental data from one of the Switch Off experiments performed herein (experimental procedure described in section 2. 3. 2. 1. Switch-Off experiment results using UV-A light) was used with both correction methods, and the results are presented below.

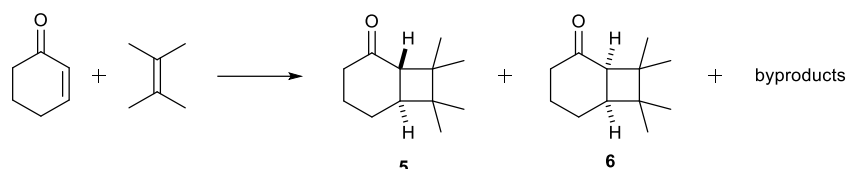

*Scheme S 2. Switch-Off [2+2] photocycloaddition reaction experiment used for comparison of light intensity inhomogeneity correction methodologies.*

Table S 2. Calculated data for the [2+2] photocycloaddition between cyclohex-2-enone and tetramethylethylene used in comparison of both correction methodologies. contains calculated values of effective exposure times and reaction yields for both methods, which were used for generation of Figure S 3. Comparison of Switch-Off experimental data obtained by not using any corrections for light inhomogeneity (black line/symbols), by using light output amendment (red line/symbols), and by excluding 10% of the endpoint data (green line/symbols).

*Table S 2. Calculated data for the [2+2] photocycloaddition between cyclohex-2-enone and tetramethylethylene used in comparison of both correction methodologies.*

| Vial | Light Output Amendment Method |                  |                               | Datapoints Exclusion Method                  |                               |                               | Diastereo isomers <b>5</b> and <b>6</b> yield [%] |
|------|-------------------------------|------------------|-------------------------------|----------------------------------------------|-------------------------------|-------------------------------|---------------------------------------------------|
|      | Residence time [min]          | Light output [%] | Effective exposure time [min] | Datapoint included or excluded from analysis | Effective Reactor Volume [mL] | Effective exposure time [min] |                                                   |
| 1    | 239.1                         | 0.0              | 235.7                         | Excluded                                     |                               |                               | 47.7%                                             |
| 2    | 236.3                         | 3.4              | 235.7                         | Excluded                                     |                               |                               | 47.8%                                             |
| 3    | 233.5                         | 15.0             | 235.5                         | Excluded                                     |                               |                               | 48.0%                                             |
| 4    | 230.6                         | 26.6             | 235.1                         | Excluded                                     |                               |                               | 45.5%                                             |
| 5    | 227.8                         | 49.7             | 234.3                         | Excluded                                     |                               |                               | 43.8%                                             |
| 6    | 225.0                         | 70.8             | 232.9                         | Included                                     | 28.500                        | 214.3                         | 43.5%                                             |
| 7    | 222.2                         | 77.9             | 230.9                         | Included                                     | 28.125                        | 211.5                         | 44.7%                                             |
| 8    | 219.4                         | 85.0             | 228.7                         | Included                                     | 27.750                        | 208.6                         | 44.6%                                             |
| 9    | 216.5                         | 93.4             | 226.3                         | Included                                     | 27.375                        | 205.8                         | 44.7%                                             |
| 10   | 213.7                         | 98.7             | 223.6                         | Included                                     | 27.000                        | 203.0                         | 45.3%                                             |
| 11   | 210.9                         | 100.7            | 220.8                         | Included                                     | 26.625                        | 200.2                         | 48.3%                                             |
| 12   | 208.1                         | 102.7            | 218.0                         | Included                                     | 26.250                        | 197.4                         | 48.2%                                             |
| 13   | 205.3                         | 104.5            | 215.1                         | Included                                     | 25.875                        | 194.5                         | 48.7%                                             |
| 14   | 202.4                         | 105.5            | 212.2                         | Included                                     | 25.500                        | 191.7                         | 49.0%                                             |
| 15   | 199.6                         | 105.1            | 209.2                         | Included                                     | 25.125                        | 188.9                         | 49.6%                                             |
| 16   | 196.8                         | 104.7            | 206.2                         | Included                                     | 24.750                        | 186.1                         | 48.6%                                             |



|    |       |       |       |          |        |       |       |
|----|-------|-------|-------|----------|--------|-------|-------|
| 17 | 194.0 | 103.7 | 203.3 | Included | 24.375 | 183.3 | 50.0% |
| 18 | 191.2 | 104.8 | 200.3 | Included | 24.000 | 180.5 | 50.1% |
| 19 | 188.3 | 106.2 | 197.4 | Included | 23.625 | 177.6 | 49.6% |
| 20 | 185.5 | 107.5 | 194.4 | Included | 23.250 | 174.8 | 50.1% |
| 21 | 182.7 | 109.6 | 191.4 | Included | 22.875 | 172.0 | 50.4% |
| 22 | 179.9 | 111.1 | 188.3 | Included | 22.500 | 169.2 | 50.5% |
| 23 | 177.1 | 111.4 | 185.1 | Included | 22.125 | 166.4 | 48.3% |
| 24 | 174.2 | 111.8 | 182.0 | Included | 21.750 | 163.5 | 49.2% |
| 25 | 171.4 | 112.6 | 178.9 | Included | 21.375 | 160.7 | 49.2% |
| 26 | 168.6 | 113.0 | 175.7 | Included | 21.000 | 157.9 | 48.6% |
| 27 | 165.8 | 113.2 | 172.5 | Included | 20.625 | 155.1 | 49.3% |
| 28 | 163.0 | 113.4 | 169.3 | Included | 20.250 | 152.3 | 48.9% |
| 29 | 160.2 | 113.5 | 166.1 | Included | 19.875 | 149.4 | 49.5% |
| 30 | 157.3 | 113.6 | 162.9 | Included | 19.500 | 146.6 | 50.1% |
| 31 | 154.5 | 113.8 | 159.7 | Included | 19.125 | 143.8 | 50.4% |
| 32 | 151.7 | 114.0 | 156.5 | Included | 18.750 | 141.0 | 50.6% |
| 33 | 148.9 | 114.1 | 153.3 | Included | 18.375 | 138.2 | 51.1% |
| 34 | 146.1 | 114.2 | 150.1 | Included | 18.000 | 135.3 | 51.2% |
| 35 | 143.2 | 114.3 | 146.9 | Included | 17.625 | 132.5 | 51.2% |
| 36 | 140.4 | 114.1 | 143.7 | Included | 17.250 | 129.7 | 51.9% |
| 37 | 137.6 | 114.7 | 140.5 | Included | 16.875 | 126.9 | 52.3% |
| 38 | 134.8 | 114.7 | 137.3 | Included | 16.500 | 124.1 | 52.8% |
| 39 | 132.0 | 114.8 | 134.0 | Included | 16.125 | 121.2 | 52.5% |
| 40 | 129.1 | 114.6 | 130.8 | Included | 15.750 | 118.4 | 53.2% |
| 41 | 126.3 | 114.6 | 127.6 | Included | 15.375 | 115.6 | 54.2% |
| 42 | 123.5 | 114.8 | 124.4 | Included | 15.000 | 112.8 | 54.6% |
| 43 | 120.7 | 114.9 | 121.1 | Included | 14.625 | 110.0 | 54.3% |
| 44 | 117.9 | 114.8 | 117.9 | Included | 14.250 | 107.1 | 55.3% |
| 45 | 115.0 | 114.8 | 114.7 | Included | 13.875 | 104.3 | 54.7% |
| 46 | 112.2 | 114.9 | 111.5 | Included | 13.500 | 101.5 | 55.8% |
| 47 | 109.4 | 115.0 | 108.2 | Included | 13.125 | 98.7  | 56.2% |
| 48 | 106.6 | 114.4 | 105.0 | Included | 12.750 | 95.9  | 56.8% |
| 49 | 103.8 | 115.0 | 101.8 | Included | 12.375 | 93.0  | 57.0% |
| 50 | 100.9 | 115.0 | 98.6  | Included | 12.000 | 90.2  | 57.4% |
| 51 | 98.1  | 114.9 | 95.3  | Included | 11.625 | 87.4  | 58.7% |
| 52 | 95.3  | 114.8 | 92.1  | Included | 11.250 | 84.6  | 58.7% |
| 53 | 92.5  | 114.8 | 88.9  | Included | 10.875 | 81.8  | 60.1% |
| 54 | 89.7  | 114.7 | 85.7  | Included | 10.500 | 78.9  | 60.8% |
| 55 | 86.8  | 114.6 | 82.5  | Included | 10.125 | 76.1  | 61.0% |
| 56 | 84.0  | 114.7 | 79.3  | Included | 9.750  | 73.3  | 61.3% |
| 57 | 81.2  | 114.7 | 76.0  | Included | 9.375  | 70.5  | 61.5% |
| 58 | 78.4  | 114.5 | 72.8  | Included | 9.000  | 67.7  | 62.6% |
| 59 | 75.6  | 114.3 | 69.6  | Included | 8.625  | 64.8  | 63.0% |

|    |      |       |      |          |       |      |       |
|----|------|-------|------|----------|-------|------|-------|
| 60 | 72.7 | 114.1 | 66.4 | Included | 8.250 | 62.0 | 64.5% |
| 61 | 69.9 | 113.8 | 63.3 | Included | 7.875 | 59.2 | 64.5% |
| 62 | 67.1 | 113.4 | 60.1 | Included | 7.500 | 56.4 | 64.0% |
| 63 | 64.3 | 112.7 | 56.9 | Included | 7.125 | 53.6 | 64.6% |
| 64 | 61.5 | 111.6 | 53.8 | Included | 6.750 | 50.8 | 65.6% |
| 65 | 58.6 | 110.7 | 50.7 | Included | 6.375 | 47.9 | 66.4% |
| 66 | 55.8 | 109.8 | 47.6 | Included | 6.000 | 45.1 | 64.5% |
| 67 | 53.0 | 108.9 | 44.5 | Included | 5.625 | 42.3 | 65.7% |
| 68 | 50.2 | 109.4 | 41.5 | Included | 5.250 | 39.5 | 65.6% |
| 69 | 47.4 | 110.4 | 38.5 | Included | 4.875 | 36.7 | 63.7% |
| 70 | 44.5 | 110.1 | 35.4 | Included | 4.500 | 33.8 | 62.5% |
| 71 | 41.7 | 111.3 | 32.4 | Included | 4.125 | 31.0 | 58.6% |
| 72 | 38.9 | 111.4 | 29.3 | Included | 3.750 | 28.2 | 57.5% |
| 73 | 36.1 | 111.1 | 26.3 | Included | 3.375 | 25.4 | 53.3% |
| 74 | 33.3 | 110.7 | 23.2 | Included | 3.000 | 22.6 | 49.5% |
| 75 | 30.5 | 109.0 | 20.2 | Included | 2.625 | 19.7 | 43.7% |
| 76 | 27.6 | 105.9 | 17.3 | Included | 2.250 | 16.9 | 37.6% |
| 77 | 24.8 | 103.0 | 14.4 | Included | 1.875 | 14.1 | 31.8% |
| 78 | 22.0 | 100.1 | 11.7 | Included | 1.500 | 11.3 | 28.3% |
| 79 | 19.2 | 91.5  | 9.1  | Included | 1.125 | 8.5  | 19.9% |
| 80 | 16.4 | 78.3  | 6.7  | Included | 0.750 | 5.6  | 15.0% |
| 81 | 13.5 | 69.4  | 4.7  | Included | 0.375 | 2.8  | 9.5%  |
| 82 | 10.7 | 60.5  | 3.0  | Included | 0.000 | 0.0  | 5.8%  |
| 83 | 7.9  | 48.0  | 1.6  | Excluded |       |      | 2.9%  |
| 84 | 5.1  | 16.7  | 0.5  | Excluded |       |      | 1.5%  |
| 85 | 2.3  | 10.4  | 0.2  | Excluded |       |      | 0.4%  |
| 86 | 0.0  | 4.0   | 0.0  | Excluded |       |      | 0.0%  |

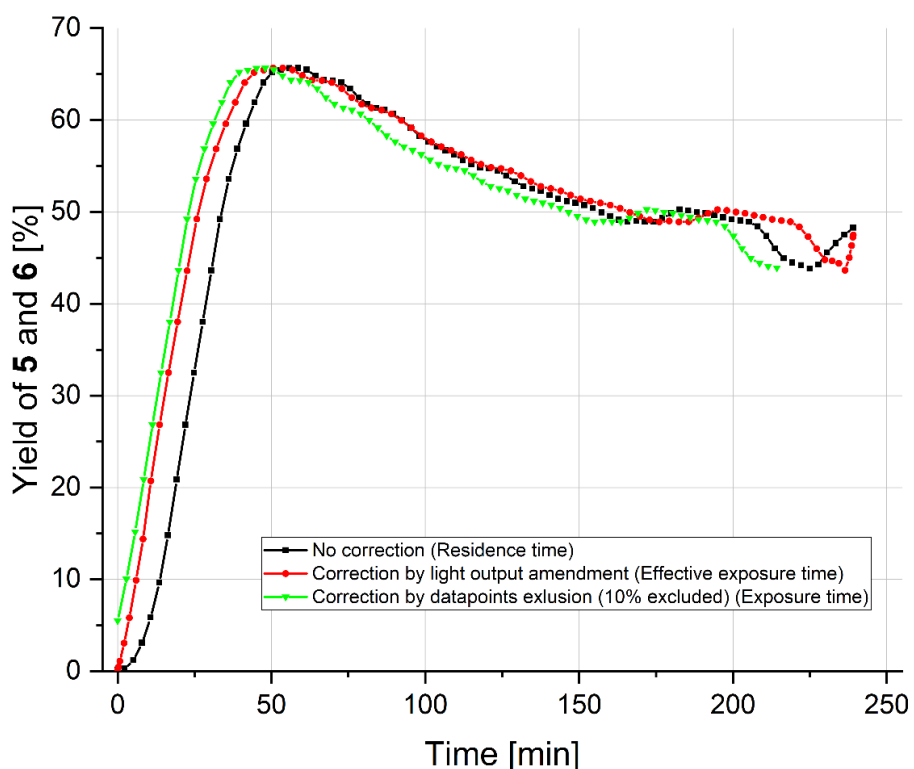

Figure S 3. Comparison of Switch-Off experimental data obtained by not using any corrections for light inhomogeneity (black line/symbols), by using light output amendment (red line/symbols), and by excluding 10% of the endpoint data (green line/symbols).

Correction performed by using light output amendment shows similar results to uncorrected data for the middle part of the data, however the front- and endpoints differ significantly, as expected due to the light irradiation inhomogeneity at the ends of the photoreactor. Second correction method, by exclusion of 10% of the data, is in a good agreement with the first correction method, however some differences are visible, especially at the end of analysed data. Both methods are viable for use, however the correction by light output amendment seems more precise, whereas the disadvantage is that it needs separate experiment for determination of the light output.

## 2. Experimental procedures

### 2. 1. General procedure for switch off experiment performed herein:

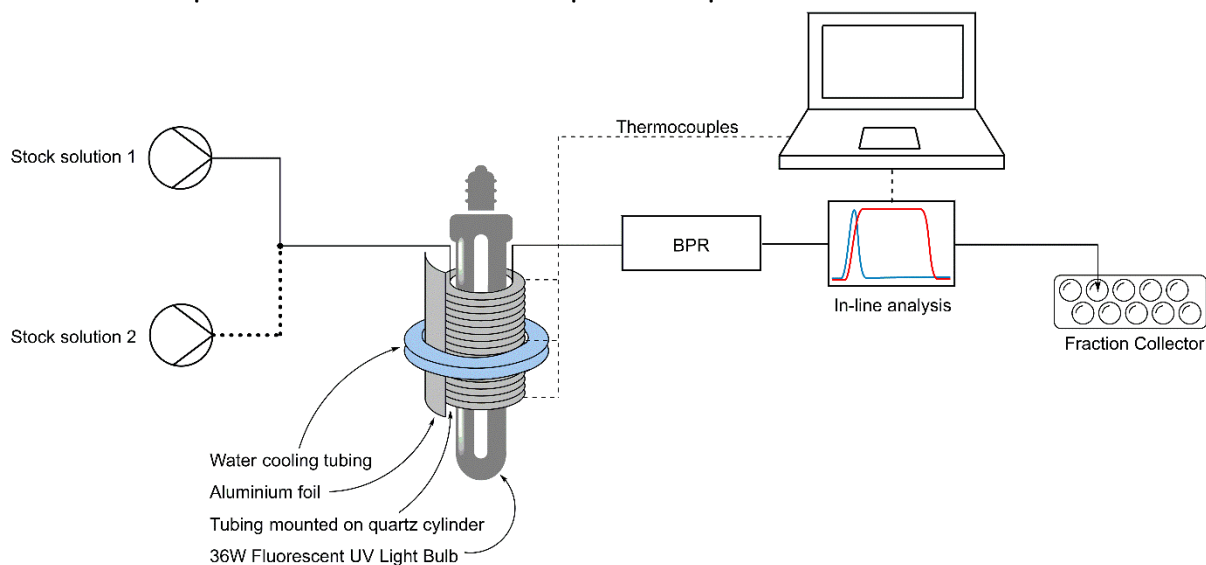

Figure S 4. Flow setup for the Switch Off experiments performed herein.

In a flask, the reagent A or the reagents A + B were mixed with an internal standard and the corresponding solvent (Stock solution 1). When indicated, in another flask, the reagent C was mixed with the corresponding solvent (Stock solution 2). Each flask was degassed by sonication whilst being saturated with nitrogen or, when indicated, with O<sub>2</sub>. Before starting the reaction, solvent was pumped at the indicated flow rate and the indicated UV light source was switched on and left to warm up for 30 minutes. The water cooling system was turned on. Once the system was stable, the feeding valves (pump A or, when indicated, pump A and B) were switched to the stock solutions. Once the UV reactor was entirely filled up with the stock solutions, the UV lamp was switched off, the feeding valves were returned to the solvent feed, the content of the UV reactor was pushed out and collected in vials, and then analysed via off-line GC experiments.

### 2. 2. [2+2] photocycloaddition of 3,4-dihydro-2H-pyran and diphenylacetylene

An example of GC chromatogram containing all studied components of the [2+2] photocycloaddition between 3,4-dihydro-2H-pyran and diphenylacetylene with their respective retention times is presented below (Figure S 5. GC chromatogram of a [2+2] photoreaction between 3,4-dihydro-2H-pyran and diphenylacetylene with studied components and their respective retention times.). Injection of pure **4** into GC gives the same shaped peak as observed on the GC chromatogram presented below, which may indicate isomerisation occurring at the injection port of the GC (which is heated to 300 °C during the measurement).

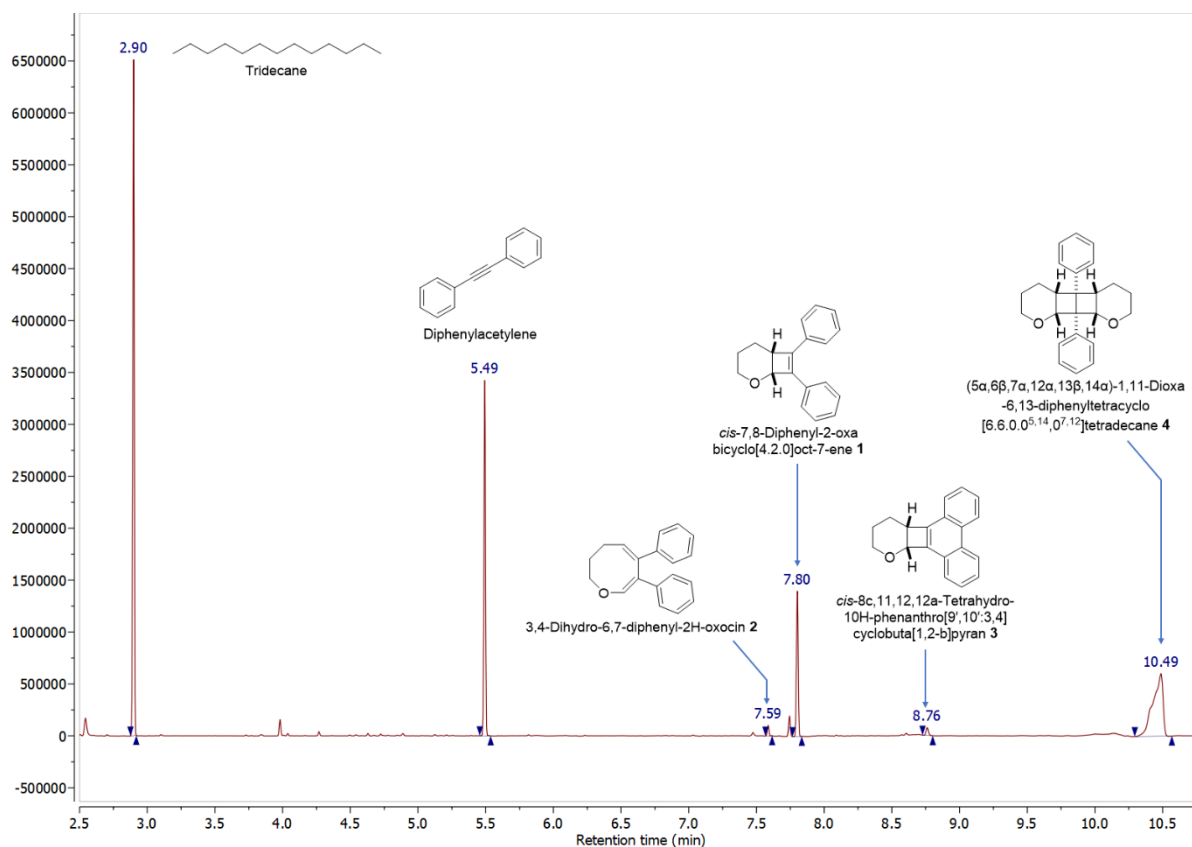

Figure S 5. GC chromatogram of a [2+2] photoreaction between 3,4-dihydro-2H-pyran and diphenylacetylene with studied components and their respective retention times.

### 2. 2. 1. Calibration curve for determination of reaction product yield using GC-FID monitoring:

Sample solutions of tridecane (internal standard) and 7,8-diphenyl-2-oxabicyclo[4.2.0]oct-7-ene (referred to as cyclobutene **1**, photocycloaddition product) were prepared accordingly to the table below and were then measured using GC-FID. Calibration curve was then prepared by plotting the ratios of cyclobutene **1** and IS areas against molar ratios of cyclobutene **1** and IS.

Table S 3. Calibration table of GC-FID for [2+2] photoreaction between 3,4-dihydro-2H-pyran and diphenylacetylene.

| Sample | Mass of cyclobutene <b>1</b> [mg] | Mass of IS (tridecane) [mg] | Moles of cyclobutene <b>1</b> [mol] | Moles of IS (tridecane) [mol] | Molar ratio of cyclobutene <b>1</b> / IS | Area of cyclobutene <b>1</b> peak | Area of IS peak (tridecane) | Area ratio of cyclobutene <b>1</b> / IS |
|--------|-----------------------------------|-----------------------------|-------------------------------------|-------------------------------|------------------------------------------|-----------------------------------|-----------------------------|-----------------------------------------|
| 1      | 4.1                               | 8.5                         | $1.56 \cdot 10^{-5}$                | $4.61 \cdot 10^{-5}$          | <b>0.338980</b>                          | 361.4                             | 1405.0                      | <b>0.257224</b>                         |
| 2      | 3.2                               | 17.0                        | $1.22 \cdot 10^{-5}$                | $9.22 \cdot 10^{-5}$          | <b>0.132285</b>                          | 257.6                             | 2520.9                      | <b>0.102186</b>                         |
| 3      | 2.9                               | 3.4                         | $1.11 \cdot 10^{-5}$                | $1.84 \cdot 10^{-5}$          | <b>0.599416</b>                          | 248.1                             | 485.7                       | <b>0.510809</b>                         |
| 4      | 8.9                               | 65.4                        | $3.39 \cdot 10^{-5}$                | $3.55 \cdot 10^{-4}$          | <b>0.095636</b>                          | 658.9                             | 9383                        | <b>0.070223</b>                         |

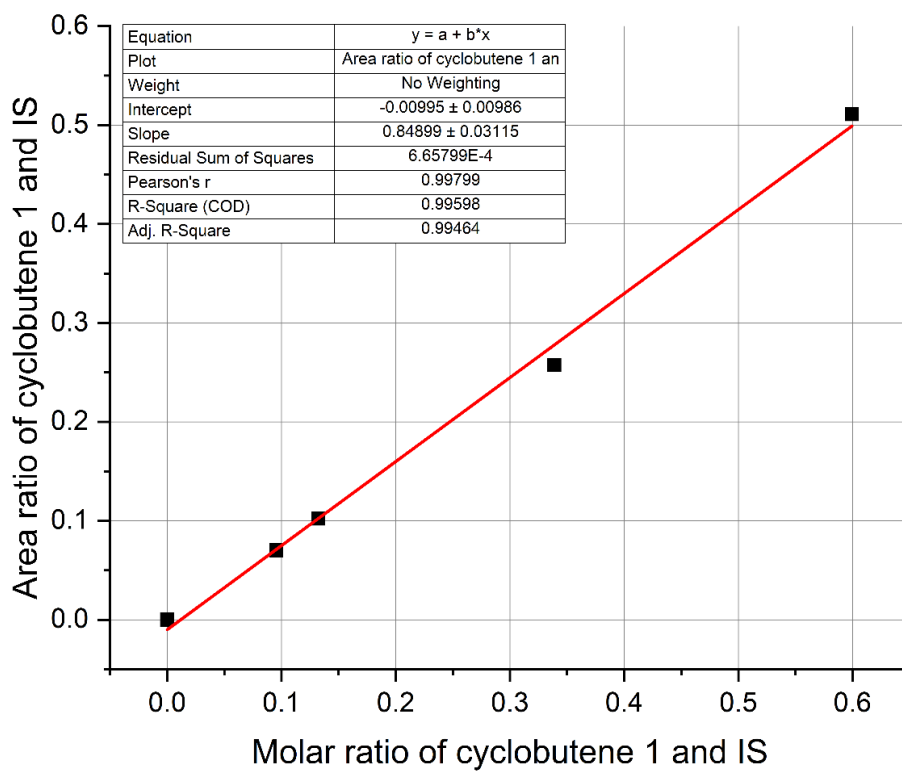

Figure S 6. GC-FID calibration curve of 7,8-diphenyl-2-oxabicyclo[4.2.0]oct-7-ene.

## 2. 2. 2. Diphenylacetylene and 3,4-dihydro-2H-pyran [2+2] photoreaction Switch-Off optimisations results:

### 2. 2. 2. 1. Switch-Off experiment results using UV-B light:

Diphenylacetylene (750.0 mg, 4.2 mmol, 1.0 eq., 56.1 mM solution) and veratrole (IS, 607.0 mg, 0.56 mL, 4.4 mmol, 1.05 eq., 58.6 mM solution) were dissolved in 3,4-dihydro-2H-pyran (75.0 mL, 100.0 vol.) and connected to a flow reagent stream. 3,4-Dihydro-2H-pyran was connected to a flow solvent stream. The UV-B lamp (Philips PL-L 36W/01/4P) and water cooling were then turned on and system was allowed to equilibrate for 30 minutes. Then reaction mixture was injected into the photoreactor (internal volume of 31.8 mL, 1.00 mm I.D., 1.60 mm O.D., PFA). Effective exposure time was set to 290 minutes (which corresponds to 0.100 mL/min flow rate). Once the photoreactor was filled with reaction mixture, the UV lamp was switched off, the pump was switched to solvent stream, the reaction mixture was eluted from the photoreactor via the flow UV-Vis monitoring cell and was collected into vials (0.5 mL of reaction mixture, diluted to 1.0 mL with acetone). Collected samples were then analysed using off-line GC.

Table S 4. Results of Switch-Off optimisation performed for [2+2] photocycloaddition of diphenylacetylene and 3,4-dihydro-2H-pyran using UV-B light.

| Vial | Residence time [min] | IS GC Area | Diphenylacetylene GC Area | Mono addition 1 GC Area | Phenanthrene 3 GC Area | Bisaddition 4 GC Area | Diphenyl acetylene/IS Area Ratio | Mono addition 1/IS Area Ratio | Phenanthrene /IS Area Ratio | Bis addition 4/IS Area Ratio | Datapoint included or excluded from analysis | Reactor volume [mL] | Effective reactor volume [mL] | Effective exposure time [min] | Conversion [%] | Yield [%] |
|------|----------------------|------------|---------------------------|-------------------------|------------------------|-----------------------|----------------------------------|-------------------------------|-----------------------------|------------------------------|----------------------------------------------|---------------------|-------------------------------|-------------------------------|----------------|-----------|
| 1    | 320                  | 560.9      | 4.0                       | 21.3                    | 18.8                   | 769.8                 | 0.00713                          | 0.0380                        | 0.0335                      | 1.37                         | Excluded                                     | 32.0                | N/A                           | N/A                           | 99.7           | 4.8       |
| 2    | 315                  | 587.3      | 4.2                       | 22.6                    | 19.6                   | 786.4                 | 0.00715                          | 0.0385                        | 0.0334                      | 1.34                         | Excluded                                     | 31.5                | N/A                           | N/A                           | 99.7           | 4.9       |
| 3    | 310                  | 588.7      | 4.4                       | 22.4                    | 19.8                   | 798.2                 | 0.00747                          | 0.0380                        | 0.0336                      | 1.36                         | Excluded                                     | 31.0                | N/A                           | N/A                           | 99.6           | 4.8       |
| 4    | 305                  | 579.6      | 4.5                       | 21.8                    | 19.6                   | 789.5                 | 0.00776                          | 0.0376                        | 0.0338                      | 1.36                         | Included                                     | 30.5                | 28.5                          | 285.0                         | 99.6           | 4.8       |
| 5    | 300                  | 597.4      | 5.0                       | 22.4                    | 20.3                   | 805.3                 | 0.00837                          | 0.0375                        | 0.0340                      | 1.35                         | Included                                     | 30.0                | 28.0                          | 280.0                         | 99.6           | 4.7       |
| 6    | 295                  | 649.9      | 5.9                       | 24.0                    | 21.2                   | 861.0                 | 0.00908                          | 0.0369                        | 0.0326                      | 1.32                         | Included                                     | 29.5                | 27.5                          | 275.0                         | 99.6           | 4.7       |
| 7    | 290                  | 648.0      | 6.6                       | 25.2                    | 21.2                   | 871.0                 | 0.0102                           | 0.0389                        | 0.0327                      | 1.34                         | Included                                     | 29.0                | 27.0                          | 270.0                         | 99.5           | 4.9       |
| 8    | 285                  | 655.3      | 7.6                       | 24.6                    | 21.3                   | 881.0                 | 0.0116                           | 0.0375                        | 0.0325                      | 1.34                         | Included                                     | 28.5                | 26.5                          | 265.0                         | 99.4           | 4.7       |
| 9    | 280                  | 638.0      | 8.6                       | 23.8                    | 20.8                   | 853.2                 | 0.0135                           | 0.0373                        | 0.0326                      | 1.34                         | Included                                     | 28.0                | 26.0                          | 260.0                         | 99.3           | 4.7       |
| 10   | 275                  | 642.0      | 10.0                      | 23.9                    | 21.1                   | 845.1                 | 0.0156                           | 0.0372                        | 0.0329                      | 1.32                         | Included                                     | 27.5                | 25.5                          | 255.0                         | 99.2           | 4.7       |
| 11   | 270                  | 649.5      | 11.7                      | 24.2                    | 20.9                   | 854.8                 | 0.0180                           | 0.0373                        | 0.0322                      | 1.32                         | Included                                     | 27.0                | 25.0                          | 250.0                         | 99.1           | 4.7       |
| 12   | 265                  | 651.9      | 13.6                      | 24.3                    | 20.6                   | 851.2                 | 0.0209                           | 0.0373                        | 0.0316                      | 1.31                         | Included                                     | 26.5                | 24.5                          | 245.0                         | 99.0           | 4.7       |
| 13   | 260                  | 739.7      | 17.7                      | 27.4                    | 22.9                   | 951.9                 | 0.0239                           | 0.0370                        | 0.0310                      | 1.29                         | Included                                     | 26.0                | 24.0                          | 240.0                         | 98.8           | 4.7       |
| 14   | 255                  | 643.9      | 17.7                      | 26.3                    | 20.4                   | 824.8                 | 0.0275                           | 0.0408                        | 0.0317                      | 1.28                         | Included                                     | 25.5                | 23.5                          | 235.0                         | 98.7           | 5.2       |

|    |     |       |       |       |      |       |        |        |        |       |          |      |      |       |      |      |
|----|-----|-------|-------|-------|------|-------|--------|--------|--------|-------|----------|------|------|-------|------|------|
| 15 | 250 | 650.5 | 20.6  | 29.6  | 20.2 | 828.6 | 0.0317 | 0.0455 | 0.0311 | 1.27  | Included | 25.0 | 23.0 | 230.0 | 98.5 | 5.8  |
| 16 | 245 | 664.2 | 24.0  | 33.7  | 20.5 | 839.3 | 0.0361 | 0.0507 | 0.0309 | 1.26  | Included | 24.5 | 22.5 | 225.0 | 98.3 | 6.4  |
| 17 | 240 | 679.3 | 27.7  | 38.1  | 20.9 | 848.7 | 0.0408 | 0.0561 | 0.0308 | 1.25  | Included | 24.0 | 22.0 | 220.0 | 98.0 | 7.1  |
| 18 | 235 | 680.0 | 31.6  | 42.2  | 20.9 | 845.6 | 0.0465 | 0.0621 | 0.0307 | 1.24  | Included | 23.5 | 21.5 | 215.0 | 97.8 | 7.8  |
| 19 | 230 | 663.6 | 34.8  | 45.3  | 20.1 | 814.0 | 0.0524 | 0.0683 | 0.0303 | 1.23  | Included | 23.0 | 21.0 | 210.0 | 97.5 | 8.6  |
| 20 | 225 | 710.4 | 42.1  | 53.0  | 21.5 | 860.8 | 0.0593 | 0.0746 | 0.0303 | 1.21  | Included | 22.5 | 20.5 | 205.0 | 97.1 | 9.4  |
| 21 | 220 | 705.7 | 47.0  | 57.4  | 20.7 | 841.9 | 0.0666 | 0.0813 | 0.0293 | 1.19  | Included | 22.0 | 20.0 | 200.0 | 96.8 | 10.3 |
| 22 | 215 | 691.3 | 51.8  | 61.4  | 20.4 | 813.1 | 0.0749 | 0.0888 | 0.0295 | 1.18  | Included | 21.5 | 19.5 | 195.0 | 96.4 | 11.2 |
| 23 | 210 | 726.8 | 60.8  | 69.5  | 20.8 | 841.5 | 0.0837 | 0.0956 | 0.0286 | 1.16  | Included | 21.0 | 19.0 | 190.0 | 96.0 | 12.1 |
| 24 | 205 | 756.0 | 70.6  | 78.2  | 21.7 | 857.9 | 0.0934 | 0.103  | 0.0287 | 1.13  | Included | 20.5 | 18.5 | 185.0 | 95.5 | 13.1 |
| 25 | 200 | 728.7 | 76.0  | 81.2  | 20.1 | 816.4 | 0.104  | 0.111  | 0.0276 | 1.12  | Included | 20.0 | 18.0 | 180.0 | 95.0 | 14.1 |
| 26 | 195 | 797.5 | 91.6  | 94.4  | 21.9 | 873.4 | 0.115  | 0.118  | 0.0275 | 1.10  | Included | 19.5 | 17.5 | 175.0 | 94.5 | 15.0 |
| 27 | 190 | 762.6 | 98.0  | 97.4  | 21.0 | 825.5 | 0.129  | 0.128  | 0.0275 | 1.08  | Included | 19.0 | 17.0 | 170.0 | 93.8 | 16.1 |
| 28 | 185 | 839.7 | 118.8 | 113.6 | 22.3 | 884.8 | 0.141  | 0.135  | 0.0266 | 1.05  | Included | 18.5 | 16.5 | 165.0 | 93.2 | 17.1 |
| 29 | 180 | 794.4 | 124.4 | 114.2 | 20.4 | 823.9 | 0.157  | 0.144  | 0.0257 | 1.04  | Included | 18.0 | 16.0 | 160.0 | 92.4 | 18.2 |
| 30 | 175 | 698.1 | 132.3 | 115.4 | 18.5 | 762.2 | 0.190  | 0.165  | 0.0265 | 1.09  | Included | 17.5 | 15.5 | 155.0 | 90.9 | 20.9 |
| 31 | 170 | 728.4 | 144.4 | 121.9 | 18.9 | 748.9 | 0.198  | 0.167  | 0.0259 | 1.03  | Included | 17.0 | 15.0 | 150.0 | 90.4 | 21.2 |
| 32 | 165 | 519.0 | 115.0 | 94.6  | 14.0 | 541.2 | 0.222  | 0.182  | 0.0270 | 1.04  | Included | 16.5 | 14.5 | 145.0 | 89.3 | 23.0 |
| 33 | 160 | 509.7 | 123.8 | 97.6  | 14.0 | 520.0 | 0.243  | 0.191  | 0.0275 | 1.02  | Included | 16.0 | 14.0 | 140.0 | 88.3 | 24.2 |
| 34 | 155 | 531.1 | 136.9 | 102.8 | 13.5 | 510.1 | 0.258  | 0.194  | 0.0254 | 0.960 | Included | 15.5 | 13.5 | 135.0 | 87.6 | 24.5 |
| 35 | 150 | 527.8 | 150.5 | 108.7 | 13.3 | 506.1 | 0.285  | 0.206  | 0.0252 | 0.959 | Included | 15.0 | 13.0 | 130.0 | 86.2 | 26.0 |
| 36 | 145 | 526.9 | 159.5 | 110.4 | 12.7 | 480.6 | 0.303  | 0.210  | 0.0241 | 0.912 | Included | 14.5 | 12.5 | 125.0 | 85.4 | 26.5 |
| 37 | 140 | 518.4 | 172.0 | 114.2 | 12.3 | 470.5 | 0.332  | 0.220  | 0.0237 | 0.908 | Included | 14.0 | 12.0 | 120.0 | 84.0 | 27.9 |
| 38 | 135 | 528.6 | 187.8 | 119.2 | 12.3 | 458.0 | 0.355  | 0.226  | 0.0233 | 0.866 | Included | 13.5 | 11.5 | 115.0 | 82.9 | 28.5 |
| 39 | 130 | 545.6 | 209.2 | 126.4 | 12.2 | 453.0 | 0.383  | 0.232  | 0.0224 | 0.830 | Included | 13.0 | 11.0 | 110.0 | 81.5 | 29.3 |
| 40 | 125 | 522.0 | 217.4 | 126.0 | 11.8 | 422.4 | 0.416  | 0.241  | 0.0226 | 0.809 | Included | 12.5 | 10.5 | 105.0 | 79.9 | 30.5 |
| 41 | 120 | 544.7 | 238.8 | 131.8 | 11.5 | 416.6 | 0.438  | 0.242  | 0.0211 | 0.765 | Included | 12.0 | 10.0 | 100.0 | 78.8 | 30.6 |



|    |     |       |        |       |      |       |       |        |        |        |          |      |     |      |      |      |
|----|-----|-------|--------|-------|------|-------|-------|--------|--------|--------|----------|------|-----|------|------|------|
| 42 | 115 | 513.9 | 242.8  | 127.5 | 10.6 | 377.9 | 0.472 | 0.248  | 0.0206 | 0.735  | Included | 11.5 | 9.5 | 95.0 | 77.2 | 31.4 |
| 43 | 110 | 527.8 | 269.1  | 134.7 | 10.7 | 378.0 | 0.510 | 0.255  | 0.0203 | 0.716  | Included | 11.0 | 9.0 | 90.0 | 75.4 | 32.3 |
| 44 | 105 | 577.5 | 310.4  | 147.3 | 11.1 | 386.3 | 0.537 | 0.255  | 0.0192 | 0.669  | Included | 10.5 | 8.5 | 85.0 | 74.1 | 32.2 |
| 45 | 100 | 615.8 | 358.5  | 161.6 | 11.7 | 398.8 | 0.582 | 0.262  | 0.0190 | 0.648  | Included | 10.0 | 8.0 | 80.0 | 71.9 | 33.2 |
| 46 | 95  | 584.5 | 365.5  | 154.7 | 10.8 | 355.5 | 0.625 | 0.265  | 0.0185 | 0.608  | Included | 9.5  | 7.5 | 75.0 | 69.8 | 33.5 |
| 47 | 90  | 559.8 | 373.0  | 149.2 | 10.0 | 321.0 | 0.666 | 0.267  | 0.0179 | 0.573  | Included | 9.0  | 7.0 | 70.0 | 67.8 | 33.7 |
| 48 | 85  | 547.9 | 389.6  | 145.8 | 9.3  | 294.1 | 0.711 | 0.266  | 0.0170 | 0.537  | Included | 8.5  | 6.5 | 65.0 | 65.7 | 33.6 |
| 49 | 80  | 547.2 | 419.8  | 147.3 | 8.9  | 276.7 | 0.767 | 0.269  | 0.0163 | 0.506  | Included | 8.0  | 6.0 | 60.0 | 63.0 | 34.0 |
| 50 | 75  | 561.7 | 460.9  | 151.4 | 8.8  | 264.6 | 0.821 | 0.270  | 0.0157 | 0.471  | Included | 7.5  | 5.5 | 55.0 | 60.4 | 34.1 |
| 51 | 70  | 568.5 | 507.6  | 154.3 | 8.5  | 248.5 | 0.893 | 0.271  | 0.0150 | 0.437  | Included | 7.0  | 5.0 | 50.0 | 56.9 | 34.3 |
| 52 | 65  | 554.5 | 522.4  | 145.9 | 7.5  | 218.6 | 0.942 | 0.263  | 0.0135 | 0.394  | Included | 6.5  | 4.5 | 45.0 | 54.5 | 33.3 |
| 53 | 60  | 568.1 | 574.1  | 147.7 | 7.2  | 200.9 | 1.01  | 0.260  | 0.0127 | 0.354  | Included | 6.0  | 4.0 | 40.0 | 51.2 | 32.9 |
| 54 | 55  | 584.9 | 649.0  | 152.8 | 6.9  | 189.4 | 1.11  | 0.261  | 0.0118 | 0.324  | Included | 5.5  | 3.5 | 35.0 | 46.4 | 33.0 |
| 55 | 50  | 562.4 | 677.3  | 143.9 | 6.0  | 161.7 | 1.20  | 0.256  | 0.0107 | 0.288  | Included | 5.0  | 3.0 | 30.0 | 41.9 | 32.3 |
| 56 | 45  | 591.9 | 761.3  | 143.2 | 5.5  | 141.4 | 1.29  | 0.242  | 0.0093 | 0.239  | Included | 4.5  | 2.5 | 25.0 | 37.9 | 30.6 |
| 57 | 40  | 560.9 | 782.7  | 129.8 | 4.5  | 111.6 | 1.40  | 0.231  | 0.0080 | 0.199  | Included | 4.0  | 2.0 | 20.0 | 32.6 | 29.3 |
| 58 | 35  | 547.0 | 824.5  | 119.3 | 3.7  | 87.1  | 1.51  | 0.218  | 0.0068 | 0.159  | Included | 3.5  | 1.5 | 15.0 | 27.2 | 27.6 |
| 59 | 30  | 568.4 | 916.8  | 112.2 | 2.9  | 68.6  | 1.61  | 0.197  | 0.0051 | 0.121  | Included | 3.0  | 1.0 | 10.0 | 22.1 | 25.0 |
| 60 | 25  | 557.8 | 969.1  | 96.8  | 2.6  | 48.8  | 1.74  | 0.174  | 0.0047 | 0.0875 | Included | 2.5  | 0.5 | 5.0  | 16.1 | 21.9 |
| 61 | 20  | 758.3 | 1380.7 | 105.4 | 2.5  | 42.4  | 1.82  | 0.139  | 0.0033 | 0.0559 | Included | 2.0  | 0.0 | 0.0  | 12.1 | 17.6 |
| 62 | 15  | 770.7 | 1481.1 | 79.1  | 1.3  | 25.3  | 1.92  | 0.103  | 0.0017 | 0.0328 | Excluded | 1.5  | N/A | N/A  | 7.2  | 13.0 |
| 63 | 10  | 709.9 | 1437.4 | 47.9  | 0.0  | 0.0   | 2.02  | 0.0675 | 0.00   | 0.00   | Excluded | 1.0  | N/A | N/A  | 2.3  | 8.5  |
| 64 | 5   | 583.1 | 1256.4 | 21.6  | 0.0  | 0.0   | 2.15  | 0.0370 | 0.00   | 0.00   | Excluded | 0.5  | N/A | N/A  | -4.0 | 4.7  |
| 65 | 0   | 571.0 | 1212.7 | 8.8   | 0.0  | 0.0   | 2.12  | 0.0154 | 0.00   | 0.00   | Excluded | 0.0  | N/A | N/A  | -2.5 | 1.9  |

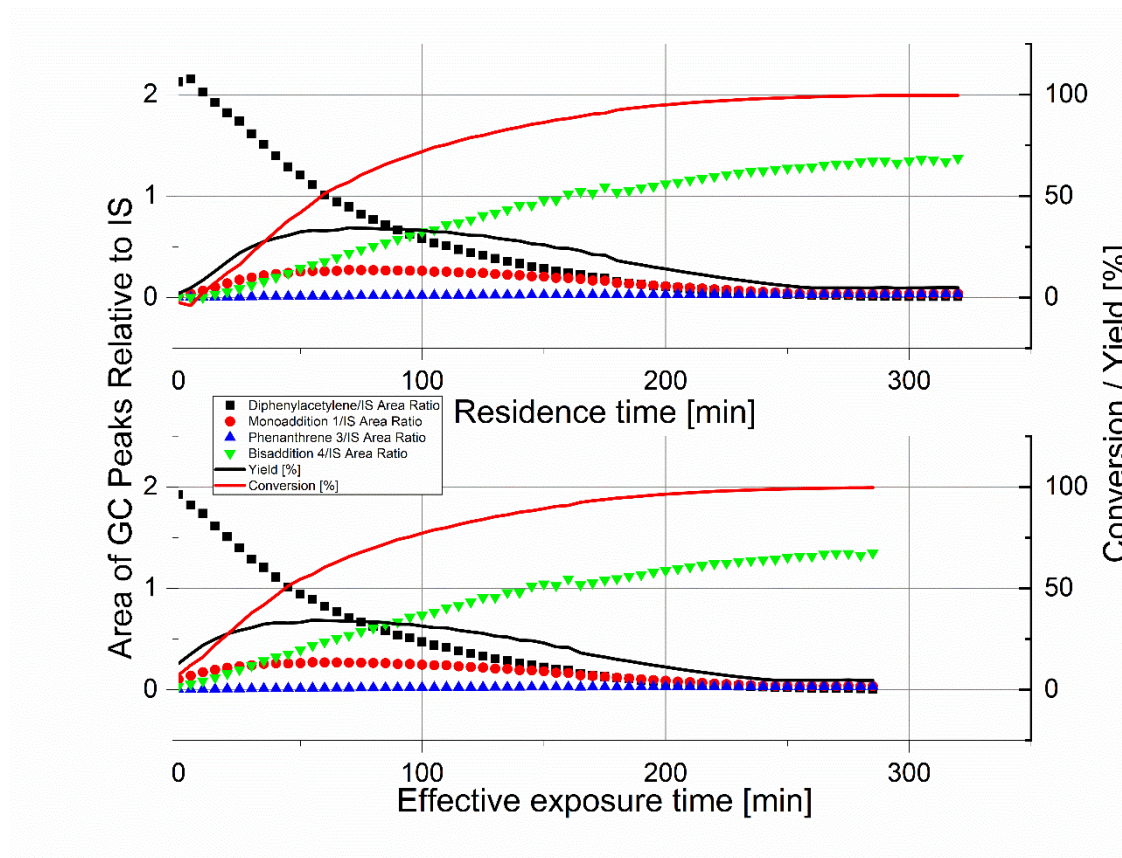

Figure S 7. Results of Switch-Off optimisation of [2+2] photoreaction using UV-B light. Top: Reaction components relative GC areas, conversion, and yield plotted against uncorrected residence time. Bottom: Reaction components GC areas, conversion, and yield plotted against exposure time, corrected for light inhomogeneity.

#### 2. 2. 2. 2. Switch-Off experiment results using UV-C light:

Diphenylacetylene (750.0 mg, 4.2 mmol, 1.0 eq., 56.1 mM solution) and veratrole (IS, 607.0 mg, 0.56 mL, 4.4 mmol, 1.05 eq., 58.6 mM solution) were dissolved in 3,4-dihydro-2H-pyran (75.0 mL, 100.0 vol.) and connected to a flow reagent stream. 3,4-Dihydro-2H-pyran was connected to a flow solvent stream. The UV-C lamp (PISCES PLL 36W) and water cooling were then turned on and system was allowed to equilibrate for 30 minutes. Then reaction mixture was injected

into the photoreactor (internal volume of 31.8 mL, 1.00 mm I.D., 1.60 mm O.D., PFA). Effective exposure time was set to 105 minutes (which corresponds to 0.277 mL/min flow rate). Once the photoreactor was filled with reaction mixture, the UV lamp was switched off, the pump was switched to solvent stream, the reaction mixture was eluted from the photoreactor, and was collected into vials (0.5 mL of reaction mixture, diluted to 1.0 mL with acetone). Collected samples were then analysed using off-line GC.

Table S 5. Results of Switch-Off optimisation performed for [2+2] photocycloaddition of diphenylacetylene and 3,4-dihydro-2H-pyran using UV-C light.

| Vial | Residence time [min] | IS GC Area | Diphenylacetylene GC Area | Mono addition 1 GC Area | Phenanthrene 3 GC Area | Bisaddition 4 GC Area | Diphenylacetylene/IS Area Ratio | Mono addition 1/IS Area Ratio | Phenanthrene /IS Area Ratio | Bis addition 4/IS Area Ratio | Datapoint included or excluded from analysis | React or volume [mL] | Effective reactor volume [mL] | Effective exposure time [min] | Conversion [%] | Yield [%] |
|------|----------------------|------------|---------------------------|-------------------------|------------------------|-----------------------|---------------------------------|-------------------------------|-----------------------------|------------------------------|----------------------------------------------|----------------------|-------------------------------|-------------------------------|----------------|-----------|
| 1    | 115.0                | 251.4      | 0.0                       | 226.6                   | 47.6                   | 2.7                   | 0.00                            | 0.901                         | 0.189                       | 0.0107                       | Excluded                                     | 31.86                | N/A                           | N/A                           | 97.2           | 61.3      |
| 2    | 113.4                | 188.0      | 0.0                       | 169.4                   | 37.7                   | 1.8                   | 0.00                            | 0.901                         | 0.201                       | 0.00957                      | Excluded                                     | 31.41                | N/A                           | N/A                           | 97.2           | 61.3      |
| 3    | 111.8                | 188.7      | 0.0                       | 170.9                   | 38.4                   | 2.1                   | 0.00                            | 0.906                         | 0.203                       | 0.0111                       | Excluded                                     | 30.97                | N/A                           | N/A                           | 97.2           | 61.6      |
| 4    | 110.2                | 207.5      | 0.0                       | 188.7                   | 42.9                   | 2.3                   | 0.00                            | 0.909                         | 0.207                       | 0.0111                       | Included                                     | 30.53                | 28.81                         | 104.00                        | 97.2           | 61.9      |
| 5    | 108.6                | 202.3      | 0.0                       | 188.1                   | 43.0                   | 2.4                   | 0.00                            | 0.930                         | 0.213                       | 0.0119                       | Included                                     | 30.08                | 28.36                         | 102.40                        | 97.2           | 63.3      |
| 6    | 107.0                | 213.7      | 0.0                       | 198.0                   | 45.0                   | 2.4                   | 0.00                            | 0.927                         | 0.211                       | 0.0112                       | Included                                     | 29.64                | 27.92                         | 100.80                        | 97.2           | 63.0      |
| 7    | 105.4                | 200.2      | 0.0                       | 186.1                   | 42.4                   | 2.3                   | 0.00                            | 0.930                         | 0.212                       | 0.0115                       | Included                                     | 29.20                | 27.48                         | 99.20                         | 97.2           | 63.2      |
| 8    | 103.8                | 220.8      | 0.0                       | 204.4                   | 47.3                   | 2.5                   | 0.00                            | 0.926                         | 0.214                       | 0.0113                       | Included                                     | 28.75                | 27.04                         | 97.60                         | 97.2           | 63.0      |
| 9    | 102.2                | 199.2      | 0.0                       | 186.3                   | 41.0                   | 2.2                   | 0.00                            | 0.935                         | 0.206                       | 0.0110                       | Included                                     | 28.31                | 26.59                         | 96.00                         | 97.2           | 63.6      |
| 10   | 100.6                | 213.7      | 0.0                       | 199.9                   | 44.5                   | 2.4                   | 0.00                            | 0.935                         | 0.208                       | 0.0112                       | Included                                     | 27.87                | 26.15                         | 94.40                         | 97.2           | 63.6      |
| 11   | 99.0                 | 227.2      | 0.0                       | 215.0                   | 46.7                   | 2.6                   | 0.00                            | 0.946                         | 0.206                       | 0.0114                       | Included                                     | 27.42                | 25.71                         | 92.80                         | 97.2           | 64.4      |
| 12   | 97.4                 | 220.3      | 0.0                       | 209.5                   | 45.6                   | 2.4                   | 0.00                            | 0.951                         | 0.207                       | 0.0109                       | Included                                     | 26.98                | 25.26                         | 91.20                         | 97.2           | 64.7      |
| 13   | 95.8                 | 244.0      | 0.0                       | 230.8                   | 49.4                   | 2.7                   | 0.00                            | 0.946                         | 0.202                       | 0.0111                       | Included                                     | 26.54                | 24.82                         | 89.60                         | 97.2           | 64.4      |
| 14   | 94.2                 | 237.6      | 0.0                       | 226.3                   | 48.2                   | 2.6                   | 0.00                            | 0.952                         | 0.203                       | 0.0109                       | Included                                     | 26.09                | 24.38                         | 88.00                         | 97.2           | 64.8      |
| 15   | 92.6                 | 227.7      | 0.0                       | 219.3                   | 45.3                   | 2.5                   | 0.00                            | 0.963                         | 0.199                       | 0.0110                       | Included                                     | 25.65                | 23.93                         | 86.40                         | 97.2           | 65.5      |
| 16   | 91.0                 | 246.1      | 0.0                       | 239.4                   | 49.2                   | 2.7                   | 0.00                            | 0.973                         | 0.200                       | 0.0110                       | Included                                     | 25.21                | 23.49                         | 84.80                         | 97.2           | 66.2      |
| 17   | 89.4                 | 230.6      | 1.3                       | 223.7                   | 46.0                   | 2.5                   | 0.00564                         | 0.970                         | 0.199                       | 0.0108                       | Included                                     | 24.76                | 23.05                         | 83.20                         | 96.7           | 66.0      |
| 18   | 87.8                 | 238.6      | 1.5                       | 232.9                   | 46.7                   | 2.5                   | 0.00629                         | 0.976                         | 0.196                       | 0.0105                       | Included                                     | 24.32                | 22.60                         | 81.60                         | 96.7           | 66.4      |
| 19   | 86.2                 | 261.2      | 1.8                       | 254.8                   | 49.8                   | 2.7                   | 0.00689                         | 0.975                         | 0.191                       | 0.0103                       | Included                                     | 23.88                | 22.16                         | 80.00                         | 96.6           | 66.4      |

|    |      |       |      |       |      |     |         |       |        |         |          |       |       |       |      |      |
|----|------|-------|------|-------|------|-----|---------|-------|--------|---------|----------|-------|-------|-------|------|------|
| 20 | 84.6 | 254.3 | 1.9  | 251.0 | 48.4 | 2.6 | 0.00747 | 0.987 | 0.190  | 0.0102  | Included | 23.43 | 21.72 | 78.40 | 96.6 | 67.2 |
| 21 | 83.0 | 250.7 | 2.0  | 250.5 | 46.8 | 2.6 | 0.00798 | 0.999 | 0.187  | 0.0104  | Included | 22.99 | 21.27 | 76.80 | 96.5 | 68.0 |
| 22 | 81.4 | 243.3 | 2.4  | 243.9 | 43.4 | 2.4 | 0.00986 | 1.00  | 0.178  | 0.00986 | Included | 22.55 | 20.83 | 75.20 | 96.4 | 68.2 |
| 23 | 79.8 | 247.6 | 2.6  | 250.5 | 44.0 | 2.4 | 0.0105  | 1.01  | 0.178  | 0.00969 | Included | 22.10 | 20.39 | 73.60 | 96.3 | 68.8 |
| 24 | 78.2 | 273.4 | 3.3  | 279.6 | 46.1 | 2.6 | 0.0121  | 1.02  | 0.169  | 0.00951 | Included | 21.66 | 19.94 | 72.00 | 96.2 | 69.6 |
| 25 | 76.6 | 256.2 | 3.4  | 265.3 | 43.2 | 2.3 | 0.0133  | 1.04  | 0.169  | 0.00898 | Included | 21.22 | 19.50 | 70.40 | 96.1 | 70.5 |
| 26 | 75.0 | 264.8 | 4.0  | 274.9 | 42.7 | 2.4 | 0.0151  | 1.04  | 0.161  | 0.00906 | Included | 20.78 | 19.06 | 68.80 | 95.9 | 70.6 |
| 27 | 73.4 | 231.8 | 4.0  | 242.5 | 36.2 | 2.0 | 0.0173  | 1.05  | 0.156  | 0.00863 | Included | 20.33 | 18.61 | 67.20 | 95.7 | 71.2 |
| 28 | 71.8 | 229.9 | 4.4  | 240.3 | 34.6 | 1.9 | 0.0191  | 1.05  | 0.151  | 0.00826 | Included | 19.89 | 18.17 | 65.60 | 95.5 | 71.1 |
| 29 | 70.2 | 235.6 | 5.1  | 249.2 | 34.7 | 1.9 | 0.0216  | 1.06  | 0.147  | 0.00806 | Included | 19.45 | 17.73 | 64.00 | 95.3 | 72.0 |
| 30 | 68.6 | 238.5 | 6.2  | 254.9 | 33.8 | 1.9 | 0.0260  | 1.07  | 0.142  | 0.00797 | Included | 19.00 | 17.28 | 62.40 | 94.9 | 72.7 |
| 31 | 67.0 | 243.3 | 7.0  | 258.6 | 32.8 | 1.8 | 0.0288  | 1.06  | 0.135  | 0.00740 | Included | 18.56 | 16.84 | 60.80 | 94.7 | 72.3 |
| 32 | 65.4 | 259.6 | 8.5  | 277.9 | 33.6 | 1.9 | 0.0327  | 1.07  | 0.129  | 0.00732 | Included | 18.12 | 16.40 | 59.20 | 94.3 | 72.8 |
| 33 | 63.8 | 277.2 | 10.5 | 300.4 | 34.2 | 1.9 | 0.0379  | 1.08  | 0.123  | 0.00685 | Included | 17.67 | 15.96 | 57.60 | 93.9 | 73.7 |
| 34 | 62.2 | 263.7 | 11.4 | 286.7 | 32.1 | 1.7 | 0.0432  | 1.09  | 0.122  | 0.00645 | Included | 17.23 | 15.51 | 56.00 | 93.4 | 74.0 |
| 35 | 60.6 | 258.6 | 12.4 | 279.5 | 29.9 | 1.6 | 0.0480  | 1.08  | 0.116  | 0.00619 | Included | 16.79 | 15.07 | 54.40 | 93.0 | 73.5 |
| 36 | 59.0 | 242.6 | 13.3 | 262.2 | 26.3 | 1.5 | 0.0548  | 1.08  | 0.108  | 0.00618 | Included | 16.34 | 14.63 | 52.80 | 92.4 | 73.5 |
| 37 | 57.4 | 262.7 | 15.9 | 281.8 | 26.9 | 1.5 | 0.0605  | 1.07  | 0.102  | 0.00571 | Included | 15.90 | 14.18 | 51.20 | 91.9 | 73.0 |
| 38 | 55.8 | 256.0 | 17.4 | 271.4 | 24.6 | 1.2 | 0.0680  | 1.06  | 0.0961 | 0.00469 | Included | 15.46 | 13.74 | 49.60 | 91.2 | 72.1 |
| 39 | 54.2 | 302.3 | 23.2 | 328.2 | 29.3 | 1.6 | 0.0767  | 1.09  | 0.0969 | 0.00529 | Included | 15.01 | 13.30 | 48.00 | 90.5 | 73.9 |
| 40 | 52.6 | 324.1 | 27.9 | 353.6 | 29.8 | 1.6 | 0.0861  | 1.09  | 0.0919 | 0.00494 | Included | 14.57 | 12.85 | 46.40 | 89.7 | 74.2 |
| 41 | 51.0 | 320.5 | 31.8 | 351.7 | 28.0 | 1.5 | 0.0992  | 1.10  | 0.0874 | 0.00468 | Included | 14.13 | 12.41 | 44.80 | 88.5 | 74.7 |
| 42 | 49.4 | 294.5 | 31.9 | 317.3 | 24.4 | 1.4 | 0.108   | 1.08  | 0.0829 | 0.00475 | Included | 13.68 | 11.97 | 43.20 | 87.7 | 73.3 |
| 43 | 47.8 | 295.4 | 35.0 | 317.7 | 23.6 | 1.2 | 0.118   | 1.08  | 0.0799 | 0.00406 | Included | 13.24 | 11.52 | 41.60 | 86.8 | 73.2 |
| 44 | 46.2 | 322.5 | 41.8 | 343.8 | 24.4 | 1.3 | 0.130   | 1.07  | 0.0757 | 0.00403 | Included | 12.80 | 11.08 | 40.00 | 85.8 | 72.5 |
| 45 | 44.6 | 304.5 | 42.9 | 319.8 | 22.0 | 1.2 | 0.141   | 1.05  | 0.0722 | 0.00394 | Included | 12.35 | 10.64 | 38.40 | 84.8 | 71.5 |
| 46 | 43.0 | 339.9 | 52.9 | 357.2 | 23.3 | 1.3 | 0.156   | 1.05  | 0.0685 | 0.00382 | Included | 11.91 | 10.19 | 36.80 | 83.5 | 71.5 |

|    |      |        |        |       |      |      |       |       |         |         |          |       |      |       |      |           |
|----|------|--------|--------|-------|------|------|-------|-------|---------|---------|----------|-------|------|-------|------|-----------|
| 47 | 41.4 | 298.8  | 51.2   | 307.2 | 19.5 | 1.1  | 0.171 | 1.03  | 0.0653  | 0.00368 | Included | 11.47 | 9.75 | 35.20 | 82.1 | 69.9      |
| 48 | 39.8 | 290.0  | 54.2   | 295.7 | 17.6 | 0.0  | 0.187 | 1.02  | 0.0607  | 0.00    | Included | 11.02 | 9.31 | 33.60 | 80.8 | 69.4      |
| 49 | 38.2 | 311.2  | 63.9   | 311.1 | 17.7 | 0.0  | 0.205 | 1.000 | 0.0569  | 0.00    | Included | 10.58 | 8.86 | 32.00 | 79.2 | 68.0      |
| 50 | 36.6 | 332.4  | 76.2   | 327.1 | 17.3 | 0.0  | 0.229 | 0.984 | 0.0520  | 0.00    | Included | 10.14 | 8.42 | 30.40 | 77.1 | 67.0      |
| 51 | 35.0 | 302.0  | 75.3   | 294.0 | 14.8 | 0.0  | 0.249 | 0.974 | 0.0490  | 0.00    | Included | 9.70  | 7.98 | 28.80 | 75.3 | 66.2      |
| 52 | 33.4 | 330.8  | 89.5   | 312.8 | 13.8 | 0.0  | 0.271 | 0.946 | 0.0417  | 0.00    | Included | 9.25  | 7.53 | 27.20 | 73.4 | 64.3      |
| 53 | 31.8 | 299.3  | 89.4   | 277.4 | 11.9 | 0.0  | 0.299 | 0.927 | 0.0398  | 0.00    | Included | 8.81  | 7.09 | 25.60 | 70.9 | 63.1      |
| 54 | 30.2 | 334.3  | 108.1  | 304.4 | 12.4 | 0.0  | 0.323 | 0.911 | 0.0371  | 0.00    | Included | 8.37  | 6.65 | 24.00 | 68.8 | 62.0      |
| 55 | 28.6 | 327.4  | 114.0  | 284.3 | 10.9 | 0.0  | 0.348 | 0.868 | 0.0333  | 0.00    | Included | 7.92  | 6.20 | 22.40 | 66.6 | 59.1      |
| 56 | 27.0 | 330.1  | 124.8  | 279.4 | 10.1 | 0.0  | 0.378 | 0.846 | 0.0306  | 0.00    | Included | 7.48  | 5.76 | 20.80 | 64.0 | 57.6      |
| 57 | 25.4 | 334.9  | 137.0  | 271.2 | 9.4  | 0.0  | 0.409 | 0.810 | 0.0281  | 0.00    | Included | 7.04  | 5.32 | 19.20 | 61.2 | 55.1      |
| 58 | 23.8 | 309.6  | 138.8  | 244.1 | 7.5  | 0.0  | 0.448 | 0.788 | 0.0242  | 0.00    | Included | 6.59  | 4.88 | 17.60 | 57.8 | 53.6      |
| 59 | 22.2 | 304.9  | 147.2  | 225.3 | 7.1  | 0.0  | 0.483 | 0.739 | 0.0233  | 0.00    | Included | 6.15  | 4.43 | 16.00 | 54.7 | 50.3      |
| 60 | 20.6 | 312.6  | 161.6  | 216.7 | 6.2  | 0.0  | 0.517 | 0.693 | 0.0198  | 0.00    | Included | 5.71  | 3.99 | 14.40 | 51.7 | 47.2      |
| 61 | 19.0 | 336.2  | 192.1  | 223.7 | 5.6  | 0.0  | 0.571 | 0.665 | 0.0167  | 0.00    | Included | 5.26  | 3.55 | 12.80 | 46.9 | 45.3      |
| 62 | 17.4 | 339.5  | 206.5  | 205.7 | 4.8  | 0.0  | 0.608 | 0.606 | 0.0141  | 0.00    | Included | 4.82  | 3.10 | 11.20 | 43.7 | 41.2<br>2 |
| 63 | 15.8 | 351.1  | 230.0  | 196.4 | 4.4  | 0.0  | 0.655 | 0.559 | 0.0125  | 0.00    | Included | 4.38  | 2.66 | 9.60  | 39.6 | 38.0<br>6 |
| 64 | 14.2 | 320.0  | 222.1  | 160.9 | 3.2  | 0.0  | 0.694 | 0.503 | 0.0100  | 0.00    | Included | 3.93  | 2.22 | 8.00  | 36.1 | 34.2<br>1 |
| 65 | 12.6 | 374.8  | 278.9  | 168.3 | 2.5  | 0.0  | 0.744 | 0.449 | 0.00667 | 0.00    | Included | 3.49  | 1.77 | 6.40  | 31.7 | 30.5<br>5 |
| 66 | 11.0 | 308.6  | 247.2  | 122.8 | 2.0  | 0.0  | 0.801 | 0.398 | 0.00648 | 0.00    | Included | 3.05  | 1.33 | 4.80  | 26.7 | 27.0<br>7 |
| 67 | 9.4  | 326.7  | 274.6  | 109.9 | 1.7  | 0.0  | 0.841 | 0.336 | 0.00520 | 0.00    | Included | 2.60  | 0.89 | 3.20  | 23.2 | 22.8<br>9 |
| 68 | 7.8  | 328.9  | 294.0  | 90.7  | 1.2  | 0.0  | 0.894 | 0.276 | 0.00365 | 0.00    | Included | 2.16  | 0.44 | 1.60  | 18.5 | 18.7<br>6 |
| 69 | 6.2  | 338.10 | 321.30 | 72.70 | 0.00 | 0.00 | 0.95  | 0.22  | 0.00    | 0.00    | Included | 1.72  | 0.00 | 0.00  | 13.6 | 14.6<br>3 |
| 70 | 4.6  | 349.70 | 346.50 | 56.20 | 0.00 | 0.00 | 0.99  | 0.16  | 0.00    | 0.00    | Excluded | 1.27  | N/A  | N/A   | 10.0 | 10.9<br>3 |
| 71 | 3.0  | 390.50 | 407.80 | 43.30 | 0.00 | 0.00 | 1.04  | 0.11  | 0.00    | 0.00    | Excluded | 0.83  | N/A  | N/A   | 5.3  | 7.54      |
| 72 | 1.4  | 297.30 | 319.90 | 21.40 | 0.00 | 0.00 | 1.08  | 0.07  | 0.00    | 0.00    | Excluded | 0.39  | N/A  | N/A   | 2.5  | 4.90      |

|    |      |        |        |       |      |      |      |      |      |      |          |       |     |     |     |      |
|----|------|--------|--------|-------|------|------|------|------|------|------|----------|-------|-----|-----|-----|------|
| 73 | -0.2 | 356.60 | 393.90 | 16.10 | 0.00 | 0.00 | 1.10 | 0.05 | 0.00 | 0.00 | Excluded | -0.06 | N/A | N/A | 0.0 | 3.07 |
|----|------|--------|--------|-------|------|------|------|------|------|------|----------|-------|-----|-----|-----|------|

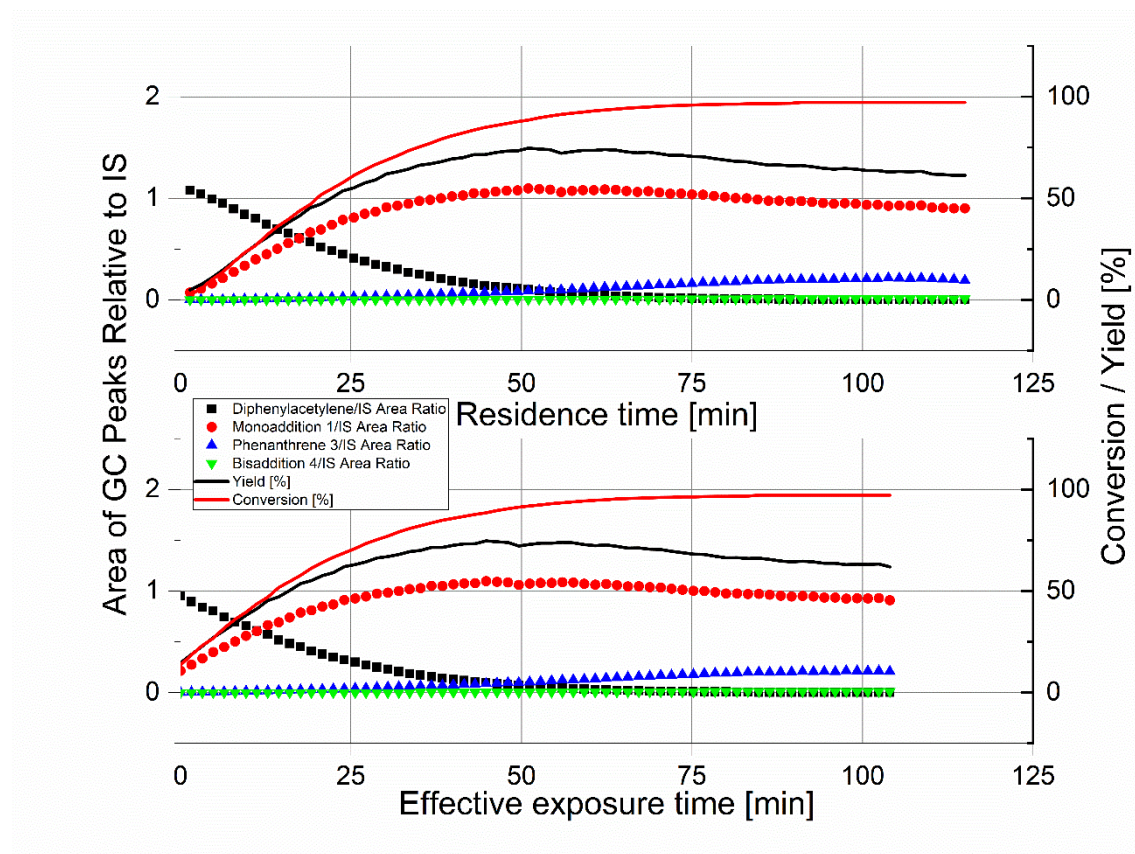

Figure S 8. Results of Switch-Off optimisation of [2+2] photoreaction using UV-C light. Top: Reaction components absolute GC areas, conversion, and yield plotted against uncorrected residence time. Bottom: Reaction components GC areas, conversion, and yield plotted against exposure time, corrected for light inhomogeneity.

### 2. 2. 3. Validation of Switch-Off results obtained in [2+2] photocycloaddition of 3,4-dihydro-2H-pyran and diphenylacetylene

Two validation experiments were performed, first utilizing UV-B light source and second utilizing UV-C light source with optimum effective exposure times of 50 minutes and 43 minutes, respectively, obtained from the switch-Off optimisation experiments.

#### 2. 2. 3. 1. Irradiation over 50 minutes of effective exposure time under UV-B light

Diphenylacetylene (250.0 mg, 1.40 mmol, 56.1 mM solution) was dissolved in 3,4-dihydro-2H-pyran (25.0 mL, 100.0 vol.) and the mixture was injected into photoreactor (internal volume of 31.8 mL, 1.00 mm I.D., 1.60 mm O.D., PFA) equipped with UV-B lamp (Philips PL-L 36W/01/4P). Irradiation over 50 minutes of effective exposure time was set (corresponding to 0.489 mL/min total flow rate). After injection of 20.0 mL, reaction mixture was eluted from photoreactor using pure 3,4-dihydro-2H-pyran, reaction mixture was then collected, solvent was removed, and obtained material was initially purified by column chromatography (SiO<sub>2</sub>; *n*-hexane:AcOEt 10:0 to 9:1). Fractions containing product were combined, solvent was removed, remaining residue was dried *in vacuo*, and 7,8-diphenyl-2-oxabicyclo[4.2.0]oct-7-ene was obtained as a yellow dense oil (134.5 mg, 0.52 mmol, 36.8% yield). NMR data was consistent with literature.<sup>1</sup>

#### 2. 2. 3. 2. Irradiation over 43 minutes of effective exposure time under UV-C light

Diphenylacetylene (1.51 g, 8.47 mmol, 0.056 M solution) was dissolved in 3,4-dihydro-2H-pyran (150.0 mL, 100.0 vol.) and the mixture was injected into photoreactor (internal volume of 31.8 mL, 1.00 mm I.D., 1.60 mm O.D., PFA) equipped with UV-C lamp (DuraBulb 36W UV-C 253.7 nm). Irradiation over 43 minutes of effective exposure time was set (corresponding to 0.670 mL/min total flow rate). After injection of 145.0 mL, reaction mixture was eluted from photoreactor using pure 3,4-dihydro-2H-pyran, reaction mixture was then collected, solvent was removed, and obtained material was initially purified by flash chromatography (SiO<sub>2</sub>; *n*-hexane:AcOEt 9:1), and then by automated column chromatography system (Biotage Selekt, Biotage HP-Sphere 25 micron). Fractions containing product were combined, solvent was removed, remaining residue was dried *in vacuo*, and 7,8-diphenyl-2-oxabicyclo[4.2.0]oct-7-ene was obtained as slightly yellow dense oil (1.521 g, 5.80 mmol, 70.8% yield). NMR data was consistent with literature.<sup>1</sup>

### 2. 3. [2+2] photocycloaddition of cyclohex-2-enone and 1,1,2,2-tetramethylethylene

An example of GC chromatogram containing all studied components of the [2+2] photocycloaddition between cyclohex-2-enone and tetramethylethylene with their respective retention times is presented below (Figure S 9. GC chromatogram of a [2+2] photoreaction between cyclohex-2-enone and tetramethylethylene with studied components and their respective retention times.).

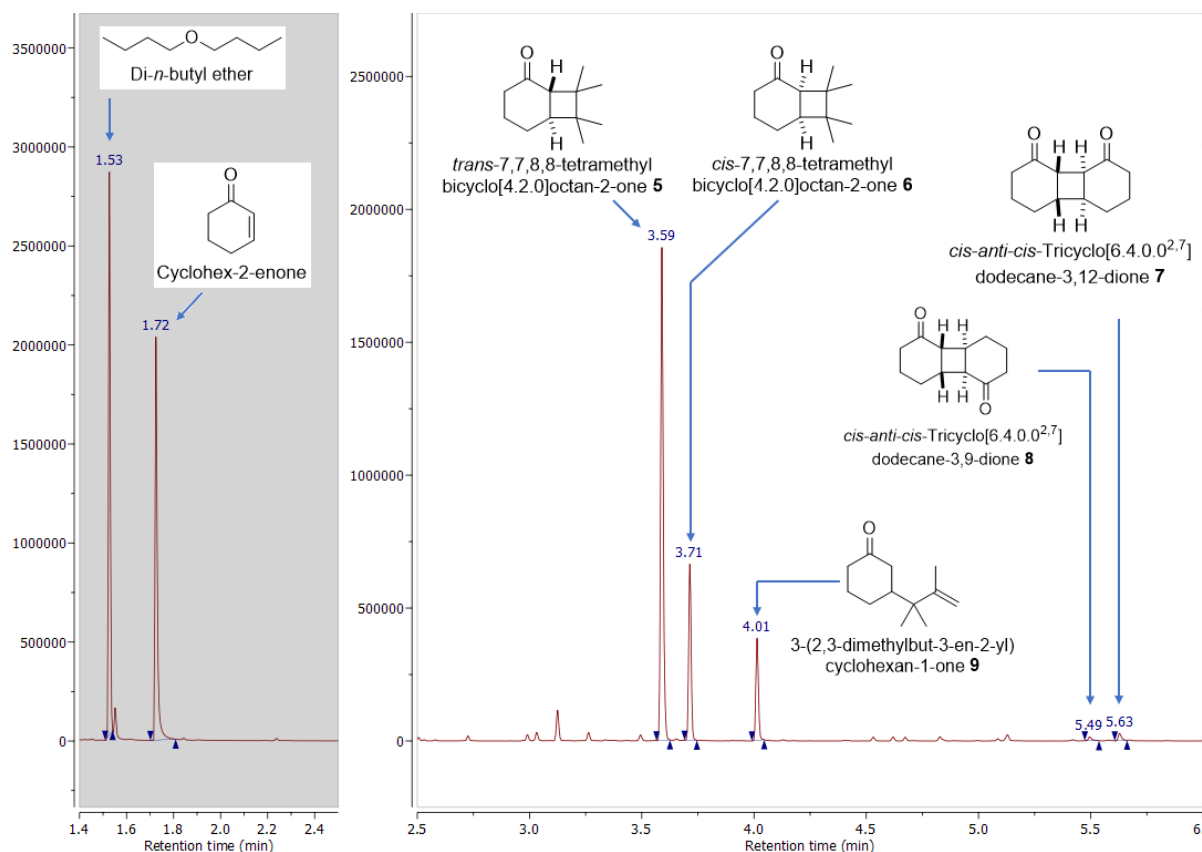

Figure S 9. GC chromatogram of a [2+2] photoreaction between cyclohex-2-enone and tetramethylethylene with studied components and their respective retention times.

**2. 3. 1. Calibration curve for determination of compounds 5 and 6 yields using GC-FID monitoring:** Sample solutions of dibutyl ether (internal standard) and 7,7,8,8-tetramethylbicyclo[4.2.0]octan-2-one (photocycloaddition products 5 and 6) were prepared accordingly to the table below and were then measured using GC-FID. Calibration curve was then prepared by plotting the ratios of phenanthrene and IS areas against molar ratios of phenanthrene and IS.

Table S 6. Calibration table of GC-FID for [2+2] photoreaction between cyclohex-2-enone and tetramethylethylene.

| Sample | Mass of diastereoisomers (5 and 6) [mg] | Mass of IS [mg] | Moles of diastereoisomers (5 and 6) [mol] | Moles of IS [mol]    | Molar ratio of diastereoisomers (5 and 6) and IS | Area of diastereoisomers (5 and 6) peak | Area of IS peak | Area ratio of diastereoisomers (5 and 6) and IS |
|--------|-----------------------------------------|-----------------|-------------------------------------------|----------------------|--------------------------------------------------|-----------------------------------------|-----------------|-------------------------------------------------|
| 1      | 3.9                                     | 3.0             | $2.15 \cdot 10^{-5}$                      | $2.33 \cdot 10^{-5}$ | <b>1.53616</b>                                   | 1072.73                                 | 698.32          | <b>0.92497</b>                                  |
| 2      | 3.6                                     | 1.6             | $1.97 \cdot 10^{-5}$                      | $1.21 \cdot 10^{-5}$ | <b>2.69157</b>                                   | 1004.28                                 | 373.12          | <b>1.63331</b>                                  |
| 3      | 1.3                                     | 2.9             | $7.38 \cdot 10^{-5}$                      | $2.22 \cdot 10^{-5}$ | <b>0.50536</b>                                   | 373.32                                  | 738.72          | <b>0.33242</b>                                  |
| 4      | 0.9                                     | 1.4             | $4.71 \cdot 10^{-5}$                      | $1.04 \cdot 10^{-5}$ | <b>0.75313</b>                                   | 246.53                                  | 327.34          | <b>0.45480</b>                                  |



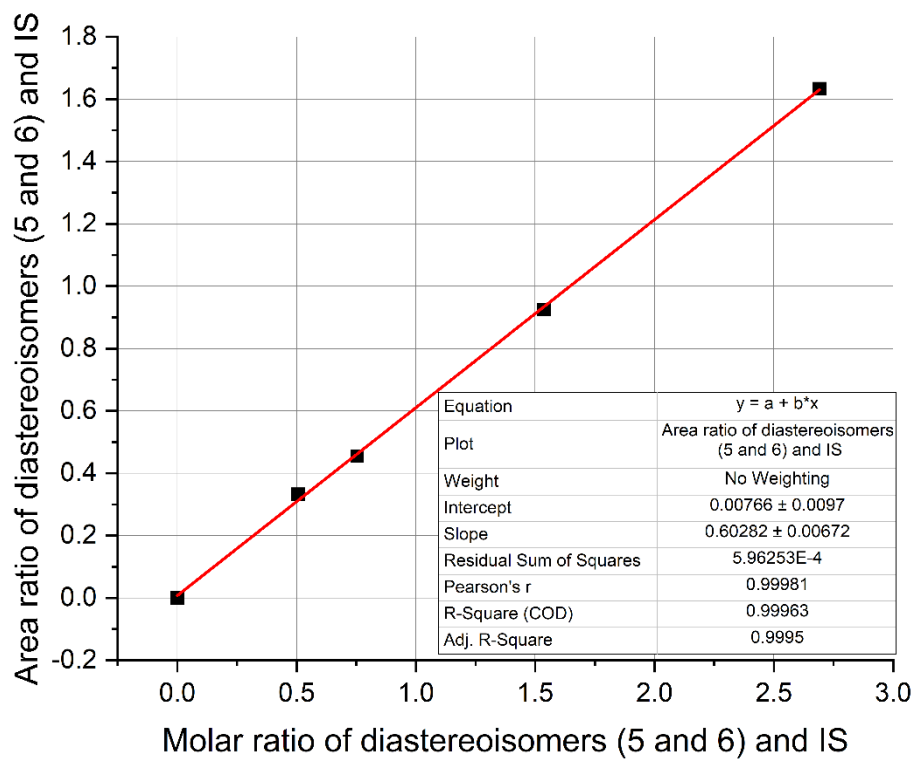

Figure S 10. GC-FID calibration curve of 7,7,8,8-tetramethylbicyclo[4.2.0]octan-2-one 5 and 6.

## 2. 3. 2. Cyclohex-2-enone and tetramethylethylene [2+2] photoreaction Switch-Off optimisations results

### 2. 3. 2. 1. Switch-Off experiment results using UV-A light

Cyclohex-2-enone (125.0  $\mu$ L, 124.0 mg, 1.3 mmol, 1.0 eq., 25.8 mM solution), dibutyl ether (0.19 mL, 146.0 mg, 1.1 mmol, 0.85 eq., 22.4 mmol solution), and tetramethylethylene (3.01 mL, 2.13 g, 25.3 mmol, 19.6 eq., 505.7 mM solution) were dissolved in anhydrous acetonitrile (47.9 mL, 386.3 vol.). Obtained solution was sonicated under high nitrogen flow for 30 minutes and was then connected to flow reagents stream. Anhydrous acetonitrile, sonicated under high nitrogen flow for 30 minutes, was connected to flow solvents stream. The UV-A lamp (Philips PLL 36W) and water cooling were then turned on and system was allowed to equilibrate for 30 minutes. Then reaction mixture was injected into the photoreactor (internal volume of 31.8 mL, 1.00 mm I.D., 1.60 mm O.D., PFA). Effective exposure time was set to 239 minutes (which corresponds to 0.133 mL/min flow rate). Once the photoreactor was filled with reaction mixture, the UV lamp was switched off, the pump was switched to solvent stream, the reaction mixture was eluted from the photoreactor, and was collected into vials (0.375 mL of reaction mixture, diluted to 1.0 mL with acetone). Collected samples were then analysed using off-line GC.

Table S 7. Results of Switch-Off optimisation performed for [2+2] photocycloaddition of cyclohex-2-enone and tetramethylethylene using UV-A light.

| Vial | Residence time | Cyclohex-2-enone GC Area | Diastereoisomer 5 GC Area | Diastereoisomer 6 GC Area | Norrish type II product 9 GC Area | Homodimers 7 and 8 GC Area | IS Area | Cyclohex-enone/IS Area ratio | Diastereoisomers 5 and 6/IS Area Ratio | Norrish type II product 9/IS Area Ratio | Homodimers 7 and 8/IS Area Ratio | Conversion [%] | Diastereoisomers 5 and 6 concentration [M] | Diastereoisomers 5 and 6 yield [%] | Lamp Efficiency [%] | Exposure time [min] |
|------|----------------|--------------------------|---------------------------|---------------------------|-----------------------------------|----------------------------|---------|------------------------------|----------------------------------------|-----------------------------------------|----------------------------------|----------------|--------------------------------------------|------------------------------------|---------------------|---------------------|
| 1    | 239.1          | 0.0                      | 127.3                     | 6.3                       | 27.2                              | 0.0                        | 146.6   | 0.00                         | 0.911                                  | 0.186                                   | 0.00                             | 100.0          | $3.28 \cdot 10^{-3}$                       | 47.7                               | 0.0                 | 235.7               |
| 2    | 236.3          | 0.0                      | 151.5                     | 7.6                       | 32.2                              | 0.0                        | 174.1   | 0.00                         | 0.914                                  | 0.185                                   | 0.00                             | 100.0          | $3.29 \cdot 10^{-3}$                       | 47.8                               | 3.4                 | 235.7               |
| 3    | 233.5          | 0.0                      | 147.4                     | 7.4                       | 31.6                              | 0.0                        | 169.0   | 0.00                         | 0.916                                  | 0.187                                   | 0.00                             | 100.0          | $3.30 \cdot 10^{-3}$                       | 48.0                               | 15.0                | 235.5               |
| 4    | 230.6          | 0.0                      | 165.2                     | 8.2                       | 35.1                              | 0.0                        | 199.6   | 0.00                         | 0.869                                  | 0.176                                   | 0.00                             | 100.0          | $3.13 \cdot 10^{-3}$                       | 45.5                               | 26.6                | 235.1               |
| 5    | 227.8          | 0.0                      | 146.2                     | 7.4                       | 31.3                              | 0.0                        | 183.4   | 0.00                         | 0.838                                  | 0.171                                   | 0.00                             | 100.0          | $3.02 \cdot 10^{-3}$                       | 43.8                               | 49.7                | 234.3               |
| 6    | 225.0          | 0.0                      | 155.3                     | 7.9                       | 33.4                              | 0.0                        | 196.2   | 0.00                         | 0.832                                  | 0.170                                   | 0.00                             | 100.0          | $2.99 \cdot 10^{-3}$                       | 43.5                               | 70.8                | 232.9               |
| 7    | 222.2          | 0.0                      | 157.8                     | 8.1                       | 34.0                              | 0.0                        | 194.4   | 0.00                         | 0.853                                  | 0.175                                   | 0.00                             | 100.0          | $3.07 \cdot 10^{-3}$                       | 44.7                               | 77.9                | 230.9               |
| 8    | 219.4          | 0.0                      | 157.2                     | 8.2                       | 34.1                              | 0.0                        | 194.1   | 0.00                         | 0.852                                  | 0.176                                   | 0.00                             | 100.0          | $3.07 \cdot 10^{-3}$                       | 44.6                               | 85.0                | 228.7               |
| 9    | 216.5          | 0.0                      | 156.5                     | 8.3                       | 33.7                              | 0.0                        | 192.8   | 0.00                         | 0.855                                  | 0.175                                   | 0.00                             | 100.0          | $3.08 \cdot 10^{-3}$                       | 44.7                               | 93.4                | 226.3               |
| 10   | 213.7          | 0.0                      | 159.1                     | 8.6                       | 34.3                              | 0.0                        | 193.7   | 0.00                         | 0.866                                  | 0.177                                   | 0.00                             | 100.0          | $3.12 \cdot 10^{-3}$                       | 45.3                               | 98.7                | 223.6               |
| 11   | 210.9          | 0.0                      | 156.2                     | 8.6                       | 34.0                              | 0.0                        | 178.7   | 0.00                         | 0.922                                  | 0.190                                   | 0.00                             | 100.0          | $3.32 \cdot 10^{-3}$                       | 48.3                               | 100.7               | 220.8               |
| 12   | 208.1          | 0.0                      | 160.0                     | 9.1                       | 34.9                              | 0.0                        | 183.5   | 0.00                         | 0.922                                  | 0.190                                   | 0.00                             | 100.0          | $3.32 \cdot 10^{-3}$                       | 48.2                               | 102.7               | 218.0               |
| 13   | 205.3          | 0.0                      | 169.0                     | 9.8                       | 36.9                              | 0.0                        | 192.2   | 0.00                         | 0.930                                  | 0.192                                   | 0.00                             | 100.0          | $3.35 \cdot 10^{-3}$                       | 48.7                               | 104.5               | 215.1               |
| 14   | 202.4          | 0.0                      | 155.3                     | 9.2                       | 34.0                              | 0.0                        | 175.6   | 0.00                         | 0.937                                  | 0.194                                   | 0.00                             | 100.0          | $3.37 \cdot 10^{-3}$                       | 49.0                               | 105.5               | 212.2               |
| 15   | 199.6          | 0.0                      | 169.6                     | 10.3                      | 36.9                              | 0.0                        | 189.8   | 0.00                         | 0.948                                  | 0.194                                   | 0.00                             | 100.0          | $3.41 \cdot 10^{-3}$                       | 49.6                               | 105.1               | 209.2               |
| 16   | 196.8          | 0.0                      | 158.9                     | 9.8                       | 34.7                              | 0.0                        | 181.6   | 0.00                         | 0.929                                  | 0.191                                   | 0.00                             | 100.0          | $3.34 \cdot 10^{-3}$                       | 48.6                               | 104.7               | 206.2               |

|    |       |     |       |      |      |     |       |      |       |       |         |       |                       |      |       |       |
|----|-------|-----|-------|------|------|-----|-------|------|-------|-------|---------|-------|-----------------------|------|-------|-------|
| 17 | 194.0 | 0.0 | 180.4 | 11.5 | 39.3 | 0.0 | 200.9 | 0.00 | 0.955 | 0.196 | 0.00    | 100.0 | 3.44·10 <sup>-3</sup> | 50.0 | 103.7 | 203.3 |
| 18 | 191.2 | 0.0 | 167.5 | 10.9 | 36.9 | 0.0 | 186.5 | 0.00 | 0.957 | 0.198 | 0.00    | 100.0 | 3.44·10 <sup>-3</sup> | 50.1 | 104.8 | 200.3 |
| 19 | 188.3 | 0.0 | 164.5 | 11.0 | 36.1 | 0.0 | 185.2 | 0.00 | 0.948 | 0.195 | 0.00    | 100.0 | 3.41·10 <sup>-3</sup> | 49.6 | 106.2 | 197.4 |
| 20 | 185.5 | 0.0 | 169.5 | 11.8 | 37.3 | 0.0 | 189.6 | 0.00 | 0.956 | 0.197 | 0.00    | 100.0 | 3.44·10 <sup>-3</sup> | 50.1 | 107.5 | 194.4 |
| 21 | 182.7 | 0.0 | 171.5 | 12.3 | 37.6 | 1.2 | 191.0 | 0.00 | 0.962 | 0.197 | 0.00628 | 100.0 | 3.46·10 <sup>-3</sup> | 50.4 | 109.6 | 191.4 |
| 22 | 179.9 | 0.0 | 170.6 | 12.6 | 37.7 | 1.3 | 189.9 | 0.00 | 0.965 | 0.199 | 0.00685 | 100.0 | 3.47·10 <sup>-3</sup> | 50.5 | 111.1 | 188.3 |
| 23 | 177.1 | 0.0 | 169.9 | 13.0 | 37.5 | 1.1 | 198.1 | 0.00 | 0.923 | 0.189 | 0.00555 | 100.0 | 3.32·10 <sup>-3</sup> | 48.3 | 111.4 | 185.1 |
| 24 | 174.2 | 0.0 | 191.7 | 15.2 | 42.1 | 1.4 | 220.0 | 0.00 | 0.940 | 0.191 | 0.00636 | 100.0 | 3.39·10 <sup>-3</sup> | 49.2 | 111.8 | 182.0 |
| 25 | 171.4 | 0.0 | 173.7 | 14.2 | 38.5 | 1.3 | 200.0 | 0.00 | 0.940 | 0.193 | 0.00650 | 100.0 | 3.38·10 <sup>-3</sup> | 49.2 | 112.6 | 178.9 |
| 26 | 168.6 | 0.0 | 163.5 | 13.8 | 36.1 | 1.2 | 191.0 | 0.00 | 0.928 | 0.189 | 0.00628 | 100.0 | 3.34·10 <sup>-3</sup> | 48.6 | 113.0 | 175.7 |
| 27 | 165.8 | 0.0 | 177.1 | 15.6 | 39.4 | 1.4 | 204.8 | 0.00 | 0.941 | 0.192 | 0.00684 | 100.0 | 3.39·10 <sup>-3</sup> | 49.3 | 113.2 | 172.5 |
| 28 | 163.0 | 0.0 | 178.2 | 16.2 | 39.3 | 1.4 | 208.2 | 0.00 | 0.934 | 0.189 | 0.00672 | 100.0 | 3.36·10 <sup>-3</sup> | 48.9 | 113.4 | 169.3 |
| 29 | 160.2 | 0.0 | 177.3 | 16.8 | 39.2 | 1.4 | 205.4 | 0.00 | 0.945 | 0.191 | 0.00682 | 100.0 | 3.40·10 <sup>-3</sup> | 49.5 | 113.5 | 166.1 |
| 30 | 157.3 | 0.0 | 174.3 | 17.1 | 38.6 | 1.4 | 200.0 | 0.00 | 0.957 | 0.193 | 0.00700 | 100.0 | 3.45·10 <sup>-3</sup> | 50.1 | 113.6 | 162.9 |
| 31 | 154.5 | 0.0 | 187.8 | 19.1 | 41.4 | 1.6 | 215.0 | 0.00 | 0.962 | 0.193 | 0.00744 | 100.0 | 3.46·10 <sup>-3</sup> | 50.4 | 113.8 | 159.7 |
| 32 | 151.7 | 0.0 | 175.7 | 18.5 | 38.8 | 1.6 | 201.1 | 0.00 | 0.966 | 0.193 | 0.00796 | 100.0 | 3.48·10 <sup>-3</sup> | 50.6 | 114.0 | 156.5 |
| 33 | 148.9 | 0.0 | 178.9 | 19.6 | 39.4 | 1.6 | 203.2 | 0.00 | 0.977 | 0.194 | 0.00787 | 100.0 | 3.52·10 <sup>-3</sup> | 51.1 | 114.1 | 153.3 |
| 34 | 146.1 | 0.0 | 180.0 | 20.5 | 39.9 | 1.7 | 205.0 | 0.00 | 0.978 | 0.195 | 0.00829 | 100.0 | 3.52·10 <sup>-3</sup> | 51.2 | 114.2 | 150.1 |
| 35 | 143.2 | 0.0 | 179.8 | 21.2 | 39.6 | 1.7 | 205.7 | 0.00 | 0.977 | 0.193 | 0.00826 | 100.0 | 3.52·10 <sup>-3</sup> | 51.2 | 114.3 | 146.9 |
| 36 | 140.4 | 0.0 | 189.7 | 23.4 | 41.7 | 1.9 | 215.0 | 0.00 | 0.991 | 0.194 | 0.00884 | 100.0 | 3.57·10 <sup>-3</sup> | 51.9 | 114.1 | 143.7 |
| 37 | 137.6 | 0.0 | 190.5 | 24.3 | 42.0 | 2.0 | 215.0 | 0.00 | 0.999 | 0.195 | 0.00930 | 100.0 | 3.60·10 <sup>-3</sup> | 52.3 | 114.7 | 140.5 |
| 38 | 134.8 | 0.0 | 182.4 | 24.2 | 40.1 | 1.9 | 205.0 | 0.00 | 1.01  | 0.196 | 0.00927 | 100.0 | 3.63·10 <sup>-3</sup> | 52.8 | 114.7 | 137.3 |
| 39 | 132.0 | 0.0 | 176.2 | 24.3 | 38.6 | 1.9 | 200.0 | 0.00 | 1.00  | 0.193 | 0.00950 | 100.0 | 3.61·10 <sup>-3</sup> | 52.5 | 114.8 | 134.0 |
| 40 | 129.1 | 0.0 | 190.9 | 27.4 | 41.7 | 2.0 | 215.0 | 0.00 | 1.02  | 0.194 | 0.00930 | 100.0 | 3.66·10 <sup>-3</sup> | 53.2 | 114.6 | 130.8 |
| 41 | 126.3 | 0.0 | 200.2 | 30.0 | 43.6 | 2.2 | 222.4 | 0.00 | 1.04  | 0.196 | 0.00989 | 100.0 | 3.73·10 <sup>-3</sup> | 54.2 | 114.6 | 127.6 |
| 42 | 123.5 | 0.0 | 193.2 | 30.1 | 42.0 | 2.2 | 214.0 | 0.00 | 1.04  | 0.196 | 0.0103  | 100.0 | 3.76·10 <sup>-3</sup> | 54.6 | 114.8 | 124.4 |
| 43 | 120.7 | 0.0 | 182.8 | 29.7 | 39.7 | 2.2 | 204.8 | 0.00 | 1.04  | 0.194 | 0.0107  | 100.0 | 3.74·10 <sup>-3</sup> | 54.3 | 114.9 | 121.1 |
| 44 | 117.9 | 0.0 | 195.1 | 33.0 | 42.2 | 2.3 | 216.0 | 0.00 | 1.06  | 0.195 | 0.0106  | 100.0 | 3.80·10 <sup>-3</sup> | 55.3 | 114.8 | 117.9 |
| 45 | 115.0 | 0.0 | 182.9 | 32.2 | 39.5 | 2.2 | 205.8 | 0.00 | 1.05  | 0.192 | 0.0107  | 100.0 | 3.76·10 <sup>-3</sup> | 54.7 | 114.8 | 114.7 |

|    |       |      |       |      |      |     |       |        |       |       |        |       |                       |      |       |       |
|----|-------|------|-------|------|------|-----|-------|--------|-------|-------|--------|-------|-----------------------|------|-------|-------|
| 46 | 112.2 | 0.0  | 183.0 | 33.6 | 39.3 | 2.3 | 203.2 | 0.00   | 1.07  | 0.193 | 0.0113 | 100.0 | 3.84·10 <sup>-3</sup> | 55.8 | 114.9 | 111.5 |
| 47 | 109.4 | 0.0  | 186.9 | 35.7 | 40.0 | 2.4 | 207.3 | 0.00   | 1.07  | 0.193 | 0.0116 | 100.0 | 3.87·10 <sup>-3</sup> | 56.2 | 115.0 | 108.2 |
| 48 | 106.6 | 0.0  | 193.0 | 38.4 | 41.4 | 4.2 | 213.1 | 0.00   | 1.09  | 0.194 | 0.0197 | 100.0 | 3.91·10 <sup>-3</sup> | 56.8 | 114.4 | 105.0 |
| 49 | 103.8 | 0.0  | 184.9 | 38.3 | 39.1 | 4.0 | 205.1 | 0.00   | 1.09  | 0.191 | 0.0195 | 100.0 | 3.92·10 <sup>-3</sup> | 57.0 | 115.0 | 101.8 |
| 50 | 100.9 | 0.0  | 180.6 | 39.0 | 38.4 | 2.5 | 200.3 | 0.00   | 1.10  | 0.192 | 0.0125 | 100.0 | 3.95·10 <sup>-3</sup> | 57.4 | 115.0 | 98.6  |
| 51 | 98.1  | 0.0  | 198.4 | 44.6 | 42.1 | 4.4 | 216.6 | 0.00   | 1.12  | 0.194 | 0.0203 | 100.0 | 4.04·10 <sup>-3</sup> | 58.7 | 114.9 | 95.3  |
| 52 | 95.3  | 0.0  | 182.5 | 42.7 | 38.2 | 4.2 | 200.9 | 0.00   | 1.12  | 0.190 | 0.0209 | 100.0 | 4.04·10 <sup>-3</sup> | 58.7 | 114.8 | 92.1  |
| 53 | 92.5  | 0.0  | 189.3 | 46.1 | 40.0 | 4.6 | 205.0 | 0.00   | 1.15  | 0.195 | 0.0224 | 100.0 | 4.13·10 <sup>-3</sup> | 60.1 | 114.8 | 88.9  |
| 54 | 89.7  | 0.0  | 199.2 | 50.6 | 41.7 | 4.9 | 215.0 | 0.00   | 1.16  | 0.194 | 0.0228 | 100.0 | 4.18·10 <sup>-3</sup> | 60.8 | 114.7 | 85.7  |
| 55 | 86.8  | 0.0  | 188.1 | 49.9 | 39.7 | 4.7 | 204.3 | 0.00   | 1.16  | 0.194 | 0.0230 | 100.0 | 4.19·10 <sup>-3</sup> | 61.0 | 114.6 | 82.5  |
| 56 | 84.0  | 0.0  | 184.8 | 51.1 | 39.1 | 4.7 | 201.4 | 0.00   | 1.17  | 0.194 | 0.0233 | 100.0 | 4.22·10 <sup>-3</sup> | 61.3 | 114.7 | 79.3  |
| 57 | 81.2  | 0.0  | 192.3 | 55.3 | 39.4 | 5.0 | 210.7 | 0.00   | 1.18  | 0.187 | 0.0237 | 100.0 | 4.23·10 <sup>-3</sup> | 61.5 | 114.7 | 76.0  |
| 58 | 78.4  | 0.0  | 189.9 | 56.9 | 39.0 | 5.0 | 206.3 | 0.00   | 1.20  | 0.189 | 0.0242 | 100.0 | 4.31·10 <sup>-3</sup> | 62.6 | 114.5 | 72.8  |
| 59 | 75.6  | 0.0  | 191.3 | 59.6 | 39.8 | 5.3 | 208.4 | 0.00   | 1.20  | 0.191 | 0.0254 | 100.0 | 4.33·10 <sup>-3</sup> | 63.0 | 114.3 | 69.6  |
| 60 | 72.7  | 0.0  | 192.5 | 62.6 | 39.8 | 5.3 | 207.0 | 0.00   | 1.23  | 0.192 | 0.0256 | 100.0 | 4.44·10 <sup>-3</sup> | 64.5 | 114.1 | 66.4  |
| 61 | 69.9  | 0.0  | 195.7 | 66.3 | 40.2 | 5.6 | 212.8 | 0.00   | 1.23  | 0.189 | 0.0263 | 100.0 | 4.43·10 <sup>-3</sup> | 64.5 | 113.8 | 63.3  |
| 62 | 67.1  | 0.0  | 187.1 | 65.7 | 38.1 | 5.4 | 206.8 | 0.00   | 1.22  | 0.184 | 0.0261 | 100.0 | 4.40·10 <sup>-3</sup> | 64.0 | 113.4 | 60.1  |
| 63 | 64.3  | 2.4  | 192.9 | 70.5 | 39.2 | 5.8 | 213.6 | 0.0112 | 1.23  | 0.184 | 0.0272 | 98.8  | 4.44·10 <sup>-3</sup> | 64.6 | 112.7 | 56.9  |
| 64 | 61.5  | 3.3  | 190.7 | 72.2 | 38.4 | 5.8 | 209.7 | 0.0157 | 1.25  | 0.183 | 0.0277 | 98.3  | 4.51·10 <sup>-3</sup> | 65.6 | 111.6 | 53.8  |
| 65 | 58.6  | 4.2  | 182.4 | 71.4 | 36.6 | 5.8 | 200.0 | 0.0210 | 1.27  | 0.183 | 0.0290 | 97.7  | 4.57·10 <sup>-3</sup> | 66.4 | 110.7 | 50.7  |
| 66 | 55.8  | 6.2  | 189.9 | 76.7 | 37.9 | 6.3 | 216.4 | 0.0287 | 1.23  | 0.175 | 0.0291 | 96.8  | 4.44·10 <sup>-3</sup> | 64.5 | 109.8 | 47.6  |
| 67 | 53.0  | 8.1  | 186.0 | 77.5 | 36.9 | 6.3 | 209.9 | 0.0386 | 1.26  | 0.176 | 0.0300 | 95.7  | 4.52·10 <sup>-3</sup> | 65.7 | 108.9 | 44.5  |
| 68 | 50.2  | 11.8 | 201.9 | 86.4 | 40.0 | 7.3 | 230.0 | 0.0513 | 1.25  | 0.174 | 0.0317 | 94.3  | 4.51·10 <sup>-3</sup> | 65.6 | 109.4 | 41.5  |
| 69 | 47.4  | 14.3 | 180.6 | 79.0 | 35.5 | 6.8 | 213.5 | 0.0670 | 1.22  | 0.166 | 0.0319 | 92.6  | 4.38·10 <sup>-3</sup> | 63.7 | 110.4 | 38.5  |
| 70 | 44.5  | 18.2 | 171.1 | 76.7 | 33.6 | 6.5 | 207.4 | 0.0878 | 1.19  | 0.162 | 0.0313 | 90.3  | 4.30·10 <sup>-3</sup> | 62.5 | 110.1 | 35.4  |
| 71 | 41.7  | 24.1 | 167.1 | 76.5 | 32.7 | 6.6 | 217.7 | 0.111  | 1.12  | 0.150 | 0.0303 | 87.7  | 4.03·10 <sup>-3</sup> | 58.6 | 111.3 | 32.4  |
| 72 | 38.9  | 34.1 | 171.9 | 80.3 | 33.9 | 7.2 | 229.5 | 0.149  | 1.10  | 0.148 | 0.0314 | 83.5  | 3.96·10 <sup>-3</sup> | 57.5 | 111.4 | 29.3  |
| 73 | 36.1  | 37.9 | 141.5 | 67.1 | 27.6 | 6.0 | 205.0 | 0.185  | 1.02  | 0.135 | 0.0293 | 79.5  | 3.66·10 <sup>-3</sup> | 53.3 | 111.1 | 26.3  |
| 74 | 33.3  | 48.1 | 130.9 | 63.1 | 25.7 | 6.0 | 205.0 | 0.235  | 0.946 | 0.125 | 0.0293 | 73.9  | 3.41·10 <sup>-3</sup> | 49.5 | 110.7 | 23.2  |

|    |      |       |       |      |      |     |       |       |         |         |         |      |                       |      |       |      |
|----|------|-------|-------|------|------|-----|-------|-------|---------|---------|---------|------|-----------------------|------|-------|------|
| 75 | 30.5 | 62.9  | 119.4 | 58.2 | 23.2 | 5.5 | 212.6 | 0.296 | 0.835   | 0.109   | 0.0259  | 67.1 | 3.01·10 <sup>-3</sup> | 43.7 | 109.0 | 20.2 |
| 76 | 27.6 | 73.1  | 100.7 | 49.7 | 19.7 | 4.8 | 209.2 | 0.349 | 0.719   | 0.0942  | 0.0229  | 61.2 | 2.59·10 <sup>-3</sup> | 37.6 | 105.9 | 17.3 |
| 77 | 24.8 | 86.8  | 83.9  | 41.6 | 16.6 | 2.6 | 206.4 | 0.421 | 0.608   | 0.0804  | 0.0126  | 53.3 | 2.19·10 <sup>-3</sup> | 31.8 | 103.0 | 14.4 |
| 78 | 22.0 | 106.3 | 71.6  | 35.7 | 14.2 | 2.3 | 198.3 | 0.536 | 0.541   | 0.0716  | 0.0116  | 40.5 | 1.95·10 <sup>-3</sup> | 28.3 | 100.1 | 11.7 |
| 79 | 19.2 | 127.5 | 56.9  | 28.6 | 11.2 | 1.8 | 224.6 | 0.568 | 0.381   | 0.0499  | 0.00801 | 36.9 | 1.37·10 <sup>-3</sup> | 19.9 | 91.5  | 9.1  |
| 80 | 16.4 | 140.0 | 41.0  | 20.8 | 8.2  | 0.0 | 216.1 | 0.648 | 0.286   | 0.0379  | 0.00    | 28.0 | 1.03·10 <sup>-3</sup> | 15.0 | 78.3  | 6.7  |
| 81 | 13.5 | 141.1 | 24.7  | 12.5 | 4.8  | 0.0 | 204.6 | 0.690 | 0.182   | 0.0235  | 0.00    | 23.4 | 6.55·10 <sup>-4</sup> | 9.5  | 69.4  | 4.7  |
| 82 | 10.7 | 162.4 | 15.8  | 8.0  | 3.2  | 0.0 | 213.7 | 0.760 | 0.111   | 0.0150  | 0.00    | 15.6 | 4.01·10 <sup>-4</sup> | 5.8  | 60.5  | 3.0  |
| 83 | 7.9  | 173.6 | 8.3   | 4.2  | 1.7  | 0.0 | 222.2 | 0.781 | 0.0563  | 0.00765 | 0.00    | 13.2 | 2.03·10 <sup>-4</sup> | 2.9  | 48.0  | 1.6  |
| 84 | 5.1  | 165.7 | 3.6   | 1.8  | 0.0  | 0.0 | 191.7 | 0.864 | 0.0282  | 0.00    | 0.00    | 4.0  | 1.01·10 <sup>-4</sup> | 1.5  | 16.7  | 0.5  |
| 85 | 2.3  | 175.4 | 1.5   | 0.0  | 0.0  | 0.0 | 212.7 | 0.825 | 0.00705 | 0.00    | 0.00    | 8.4  | 2.54·10 <sup>-5</sup> | 0.4  | 10.4  | 0.2  |
| 86 | -0.6 | 168.1 | 0.0   | 0.0  | 0.0  | 0.0 | 204.9 | 0.820 | 0.00    | 0.00    | 0.00    | 8.9  | 0.00                  | 0.0  | 4.0   | 0.0  |

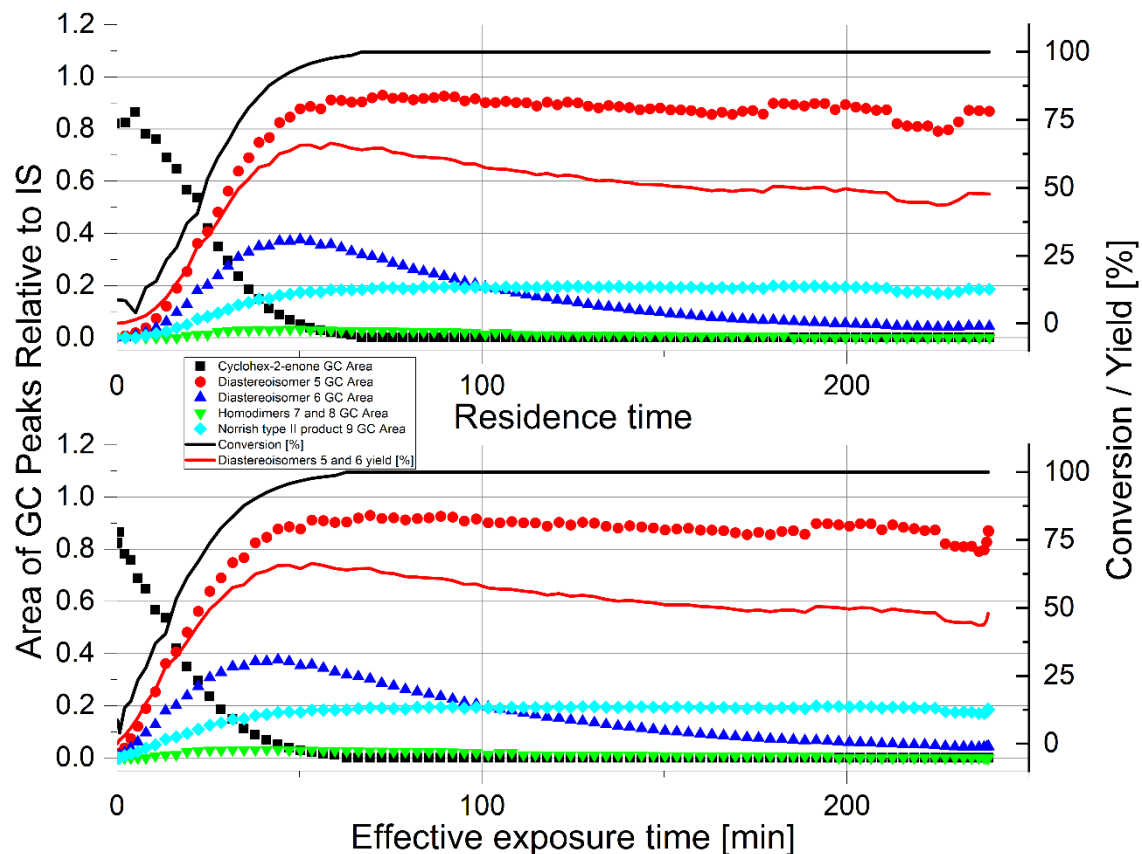

Figure S 11. Results of Switch-Off optimisation of [2+2] photoreaction using UV-A light. Top: Reaction components absolute GC areas, conversion, and yield plotted against uncorrected residence time. Bottom: Reaction components GC areas, conversion, and yield plotted against exposure time, corrected for light inhomogeneity.

### 2. 3. 2. 2. Switch-Off experiment results using UV-B light

Cyclohex-2-enone (125.0  $\mu\text{L}$ , 124.0 mg, 1.3 mmol, 1.0 eq., 25.8 mM solution), dibutyl ether (0.19 mL, 146.0 mg, 1.1 mmol, 0.85 eq., 22.4 mmol solution), and tetramethylethylene (3.01 mL, 2.13 g, 25.3 mmol, 19.6 eq., 505.7 mM solution) were dissolved in anhydrous acetonitrile (47.9 mL, 386.3 vol.). Obtained solution was sonicated under high nitrogen flow for 30 minutes and was then connected to flow reagents stream. Anhydrous acetonitrile, sonicated under high nitrogen flow for 30 minutes, was connected to flow solvents stream. The UV-B lamp (Philips PL-L 36W/01/4P) and water cooling were then turned on and system was allowed to equilibrate for 30 minutes. Then reaction mixture was injected into the photoreactor (internal volume of 31.8 mL, 1.00 mm I.D., 1.60 mm O.D., PFA). Effective exposure time was set to 239 minutes (which corresponds to 0.133 mL/min flow rate). Once the photoreactor was filled with reaction mixture, the UV lamp was switched off, the pump was switched to solvent

stream, the reaction mixture was eluted from the photoreactor, and was collected into vials (0.375 mL of reaction mixture, diluted to 1.0 mL with acetone). Collected samples were then analysed using off-line GC.

Table S 8. Results of Switch-Off optimisation performed for [2+2] photocycloaddition of cyclohex-2-enone and tetramethylethylene using UV-B light.

| Vial | Residence time | Cyclohex-2-enone GC Area | Diastereoisomer 5 GC Area | Diastereoisomer 6 GC Area | Norrish type II product 9 GC Area | Homodimers 7 and 8 GC Area | IS Area | Cyclohex-enone/IS Area ratio | Diastereoisomers 5 and 6/IS Area Ratio | Norrish type II product 9/IS Area Ratio | Homodimers 7 and 8/IS Area Ratio | Conversion [%] | Diastereoisomers 5 and 6 concentration [M] | Diastereoisomers 5 and 6 yield [%] | Datapoint included or excluded from analysis | Reactor Volume [mL] | Effective Reactor Volume [mL] | Effective Exposure Time [min] |
|------|----------------|--------------------------|---------------------------|---------------------------|-----------------------------------|----------------------------|---------|------------------------------|----------------------------------------|-----------------------------------------|----------------------------------|----------------|--------------------------------------------|------------------------------------|----------------------------------------------|---------------------|-------------------------------|-------------------------------|
| 1    | 239.1          | 0.0                      | 0.0                       | 0.0                       | 0.0                               | 0.0                        | 145.6   | 0.00                         | 0.00                                   | 0.00                                    | 0.00                             | 100.0          | 0.00                                       | 0.0                                | Excluded                                     | 31.80               | N/A                           | N/A                           |
| 2    | 236.3          | 0.0                      | 0.0                       | 0.0                       | 1.2                               | 0.0                        | 199.7   | 0.00                         | 0.00                                   | 0.00601                                 | 0.00                             | 100.0          | 0.00                                       | 0.0                                | Excluded                                     | 31.43               | N/A                           | N/A                           |
| 3    | 233.5          | 0.0                      | 0.0                       | 0.0                       | 0.0                               | 0.0                        | 191.6   | 0.00                         | 0.00                                   | 0.00                                    | 0.00                             | 100.0          | 0.00                                       | 0.0                                | Excluded                                     | 31.05               | N/A                           | N/A                           |
| 4    | 230.6          | 0.0                      | 0.0                       | 0.0                       | 1.2                               | 0.0                        | 190.7   | 0.00                         | 0.00                                   | 0.00629                                 | 0.00                             | 100.0          | 0.00                                       | 0.0                                | Excluded                                     | 30.68               | N/A                           | N/A                           |
| 5    | 227.8          | 0.0                      | 0.0                       | 0.0                       | 1.2                               | 0.0                        | 189.9   | 0.00                         | 0.00                                   | 0.00632                                 | 0.00                             | 100.0          | 0.00                                       | 0.0                                | Excluded                                     | 30.30               | N/A                           | N/A                           |
| 6    | 225.0          | 0.0                      | 0.0                       | 0.0                       | 1.3                               | 0.0                        | 197.1   | 0.00                         | 0.00                                   | 0.00660                                 | 0.00                             | 100.0          | 0.00                                       | 0.0                                | Included                                     | 29.93               | 28.500                        | 214.3                         |
| 7    | 222.2          | 0.0                      | 0.0                       | 0.0                       | 1.4                               | 0.0                        | 192.3   | 0.00                         | 0.00                                   | 0.00728                                 | 0.00                             | 100.0          | 0.00                                       | 0.0                                | Included                                     | 29.55               | 28.125                        | 211.5                         |
| 8    | 219.4          | 0.0                      | 0.0                       | 0.0                       | 1.4                               | 0.0                        | 189.8   | 0.00                         | 0.00                                   | 0.00738                                 | 0.00                             | 100.0          | 0.00                                       | 0.0                                | Included                                     | 29.18               | 27.750                        | 208.6                         |
| 9    | 216.5          | 0.0                      | 0.0                       | 0.0                       | 1.5                               | 0.0                        | 188.1   | 0.00                         | 0.00                                   | 0.00797                                 | 0.00                             | 100.0          | 0.00                                       | 0.0                                | Included                                     | 28.80               | 27.375                        | 205.8                         |
| 10   | 213.7          | 0.0                      | 0.0                       | 0.0                       | 1.8                               | 0.0                        | 201.3   | 0.00                         | 0.00                                   | 0.00894                                 | 0.00                             | 100.0          | 0.00                                       | 0.0                                | Included                                     | 28.43               | 27.000                        | 203.0                         |
| 11   | 210.9          | 0.0                      | 0.0                       | 0.0                       | 1.8                               | 0.0                        | 192.4   | 0.00                         | 0.00                                   | 0.00936                                 | 0.00                             | 100.0          | 0.00                                       | 0.0                                | Included                                     | 28.05               | 26.625                        | 200.2                         |
| 12   | 208.1          | 0.0                      | 0.0                       | 0.0                       | 2.0                               | 0.0                        | 196.9   | 0.00                         | 0.00                                   | 0.0102                                  | 0.00                             | 100.0          | 0.00                                       | 0.0                                | Included                                     | 27.68               | 26.250                        | 197.4                         |
| 13   | 205.3          | 0.0                      | 0.0                       | 0.0                       | 2.1                               | 0.0                        | 198.1   | 0.00                         | 0.00                                   | 0.0106                                  | 0.00                             | 100.0          | 0.00                                       | 0.0                                | Included                                     | 27.30               | 25.875                        | 194.5                         |
| 14   | 202.4          | 0.0                      | 0.0                       | 0.0                       | 2.1                               | 0.0                        | 183.5   | 0.00                         | 0.00                                   | 0.0114                                  | 0.00                             | 100.0          | 0.00                                       | 0.0                                | Included                                     | 26.93               | 25.500                        | 191.7                         |
| 15   | 199.6          | 0.0                      | 0.0                       | 0.0                       | 2.4                               | 0.0                        | 202.0   | 0.00                         | 0.00                                   | 0.0119                                  | 0.00                             | 100.0          | 0.00                                       | 0.0                                | Included                                     | 26.55               | 25.125                        | 188.9                         |
| 16   | 196.8          | 0.0                      | 0.0                       | 0.0                       | 2.3                               | 0.0                        | 190.6   | 0.00                         | 0.00                                   | 0.0121                                  | 0.00                             | 100.0          | 0.00                                       | 0.0                                | Included                                     | 26.18               | 24.750                        | 186.1                         |
| 17   | 194.0          | 0.0                      | 0.0                       | 0.0                       | 2.7                               | 0.0                        | 205.7   | 0.00                         | 0.00                                   | 0.0131                                  | 0.00                             | 100.0          | 0.00                                       | 0.0                                | Included                                     | 25.80               | 24.375                        | 183.3                         |
| 18   | 191.2          | 0.0                      | 0.0                       | 0.0                       | 2.6                               | 0.0                        | 194.2   | 0.00                         | 0.00                                   | 0.0134                                  | 0.00                             | 100.0          | 0.00                                       | 0.0                                | Included                                     | 25.43               | 24.000                        | 180.5                         |
| 19   | 188.3          | 0.0                      | 0.0                       | 0.0                       | 2.8                               | 0.0                        | 195.0   | 0.00                         | 0.00                                   | 0.0144                                  | 0.00                             | 100.0          | 0.00                                       | 0.0                                | Included                                     | 25.05               | 23.625                        | 177.6                         |
| 20   | 185.5          | 0.0                      | 0.0                       | 0.0                       | 2.9                               | 0.0                        | 199.4   | 0.00                         | 0.00                                   | 0.0145                                  | 0.00                             | 100.0          | 0.00                                       | 0.0                                | Included                                     | 24.68               | 23.250                        | 174.8                         |
| 21   | 182.7          | 0.0                      | 0.0                       | 0.0                       | 3.3                               | 0.0                        | 194.2   | 0.00                         | 0.00                                   | 0.0170                                  | 0.00                             | 100.0          | 0.00                                       | 0.0                                | Included                                     | 24.30               | 22.875                        | 172.0                         |
| 22   | 179.9          | 0.0                      | 0.0                       | 0.0                       | 3.4                               | 0.0                        | 205.5   | 0.00                         | 0.00                                   | 0.0165                                  | 0.00                             | 100.0          | 0.00                                       | 0.0                                | Included                                     | 23.93               | 22.500                        | 169.2                         |
| 23   | 177.1          | 0.0                      | 0.0                       | 0.0                       | 3.4                               | 0.0                        | 195.9   | 0.00                         | 0.00                                   | 0.0174                                  | 0.00                             | 100.0          | 0.00                                       | 0.0                                | Included                                     | 23.55               | 22.125                        | 166.4                         |

|    |       |     |     |     |      |     |       |      |        |        |      |       |                       |     |          |       |        |       |
|----|-------|-----|-----|-----|------|-----|-------|------|--------|--------|------|-------|-----------------------|-----|----------|-------|--------|-------|
| 24 | 174.2 | 0.0 | 0.0 | 0.0 | 3.6  | 0.0 | 203.7 | 0.00 | 0.00   | 0.0177 | 0.00 | 100.0 | 0.00                  | 0.0 | Included | 23.18 | 21.750 | 163.5 |
| 25 | 171.4 | 0.0 | 0.0 | 0.0 | 3.8  | 0.0 | 198.0 | 0.00 | 0.00   | 0.0192 | 0.00 | 100.0 | 0.00                  | 0.0 | Included | 22.80 | 21.375 | 160.7 |
| 26 | 168.6 | 0.0 | 0.0 | 0.0 | 3.9  | 0.0 | 203.5 | 0.00 | 0.00   | 0.0192 | 0.00 | 100.0 | 0.00                  | 0.0 | Included | 22.43 | 21.000 | 157.9 |
| 27 | 165.8 | 0.0 | 0.0 | 0.0 | 3.9  | 0.0 | 198.7 | 0.00 | 0.00   | 0.0196 | 0.00 | 100.0 | 0.00                  | 0.0 | Included | 22.05 | 20.625 | 155.1 |
| 28 | 163.0 | 0.0 | 0.0 | 0.0 | 4.5  | 0.0 | 206.1 | 0.00 | 0.00   | 0.0218 | 0.00 | 100.0 | 0.00                  | 0.0 | Included | 21.68 | 20.250 | 152.3 |
| 29 | 160.2 | 0.0 | 0.0 | 0.0 | 4.2  | 0.0 | 196.6 | 0.00 | 0.00   | 0.0214 | 0.00 | 100.0 | 0.00                  | 0.0 | Included | 21.30 | 19.875 | 149.4 |
| 30 | 157.3 | 0.0 | 0.0 | 0.0 | 4.5  | 0.0 | 203.9 | 0.00 | 0.00   | 0.0221 | 0.00 | 100.0 | 0.00                  | 0.0 | Included | 20.93 | 19.500 | 146.6 |
| 31 | 154.5 | 0.0 | 0.0 | 0.0 | 4.5  | 0.0 | 197.8 | 0.00 | 0.00   | 0.0228 | 0.00 | 100.0 | 0.00                  | 0.0 | Included | 20.55 | 19.125 | 143.8 |
| 32 | 151.7 | 0.0 | 0.0 | 0.0 | 4.8  | 0.0 | 199.4 | 0.00 | 0.00   | 0.0241 | 0.00 | 100.0 | 0.00                  | 0.0 | Included | 20.18 | 18.750 | 141.0 |
| 33 | 148.9 | 0.0 | 0.0 | 0.0 | 5.1  | 0.0 | 201.7 | 0.00 | 0.00   | 0.0253 | 0.00 | 100.0 | 0.00                  | 0.0 | Included | 19.80 | 18.375 | 138.2 |
| 34 | 146.1 | 0.0 | 0.0 | 0.0 | 5.6  | 0.0 | 214.9 | 0.00 | 0.00   | 0.0261 | 0.00 | 100.0 | 0.00                  | 0.0 | Included | 19.43 | 18.000 | 135.3 |
| 35 | 143.2 | 0.0 | 0.0 | 0.0 | 5.4  | 0.0 | 201.8 | 0.00 | 0.00   | 0.0268 | 0.00 | 100.0 | 0.00                  | 0.0 | Included | 19.05 | 17.625 | 132.5 |
| 36 | 140.4 | 0.0 | 0.0 | 0.0 | 5.7  | 0.0 | 206.9 | 0.00 | 0.00   | 0.0275 | 0.00 | 100.0 | 0.00                  | 0.0 | Included | 18.68 | 17.250 | 129.7 |
| 37 | 137.6 | 0.0 | 0.0 | 0.0 | 6.3  | 0.0 | 211.4 | 0.00 | 0.00   | 0.0298 | 0.00 | 100.0 | 0.00                  | 0.0 | Included | 18.30 | 16.875 | 126.9 |
| 38 | 134.8 | 0.0 | 0.0 | 0.0 | 5.9  | 0.0 | 198.7 | 0.00 | 0.00   | 0.0297 | 0.00 | 100.0 | 0.00                  | 0.0 | Included | 17.93 | 16.500 | 124.1 |
| 39 | 132.0 | 0.0 | 0.0 | 0.0 | 6.5  | 0.0 | 203.2 | 0.00 | 0.00   | 0.0320 | 0.00 | 100.0 | 0.00                  | 0.0 | Included | 17.55 | 16.125 | 121.2 |
| 40 | 129.1 | 0.0 | 0.0 | 0.0 | 6.5  | 0.0 | 201.3 | 0.00 | 0.00   | 0.0323 | 0.00 | 100.0 | 0.00                  | 0.0 | Included | 17.18 | 15.750 | 118.4 |
| 41 | 126.3 | 0.0 | 5.0 | 0.0 | 7.1  | 0.0 | 204.9 | 0.00 | 0.0244 | 0.0347 | 0.00 | 100.0 | 8.78·10 <sup>-5</sup> | 1.3 | Included | 16.80 | 15.375 | 115.6 |
| 42 | 123.5 | 0.0 | 5.3 | 0.0 | 7.8  | 0.0 | 218.3 | 0.00 | 0.0243 | 0.0357 | 0.00 | 100.0 | 8.74·10 <sup>-5</sup> | 1.3 | Included | 16.43 | 15.000 | 112.8 |
| 43 | 120.7 | 0.0 | 2.2 | 0.0 | 7.6  | 0.0 | 200.9 | 0.00 | 0.0110 | 0.0378 | 0.00 | 100.0 | 3.94·10 <sup>-5</sup> | 0.6 | Included | 16.05 | 14.625 | 110.0 |
| 44 | 117.9 | 0.0 | 2.5 | 0.0 | 7.8  | 0.0 | 200.3 | 0.00 | 0.0125 | 0.0389 | 0.00 | 100.0 | 4.49·10 <sup>-5</sup> | 0.7 | Included | 15.68 | 14.250 | 107.1 |
| 45 | 115.0 | 0.0 | 6.2 | 0.0 | 9.2  | 0.0 | 216.8 | 0.00 | 0.0286 | 0.0424 | 0.00 | 100.0 | 1.03·10 <sup>-4</sup> | 1.5 | Included | 15.30 | 13.875 | 104.3 |
| 46 | 112.2 | 0.0 | 3.3 | 0.0 | 8.6  | 0.0 | 208.9 | 0.00 | 0.0158 | 0.0412 | 0.00 | 100.0 | 5.69·10 <sup>-5</sup> | 0.8 | Included | 14.93 | 13.500 | 101.5 |
| 47 | 109.4 | 0.0 | 7.3 | 0.0 | 10.1 | 0.0 | 217.6 | 0.00 | 0.0335 | 0.0464 | 0.00 | 100.0 | 1.21·10 <sup>-4</sup> | 1.8 | Included | 14.55 | 13.125 | 98.7  |
| 48 | 106.6 | 0.0 | 4.1 | 1.6 | 10.2 | 0.0 | 214.5 | 0.00 | 0.0266 | 0.0476 | 0.00 | 100.0 | 9.57·10 <sup>-5</sup> | 1.4 | Included | 14.18 | 12.750 | 95.9  |
| 49 | 103.8 | 0.0 | 5.1 | 1.8 | 10.9 | 0.0 | 198.7 | 0.00 | 0.0347 | 0.0549 | 0.00 | 100.0 | 1.25·10 <sup>-4</sup> | 1.8 | Included | 13.80 | 12.375 | 93.0  |
| 50 | 100.9 | 0.0 | 5.7 | 1.9 | 10.8 | 0.0 | 194.2 | 0.00 | 0.0391 | 0.0556 | 0.00 | 100.0 | 1.41·10 <sup>-4</sup> | 2.0 | Included | 13.43 | 12.000 | 90.2  |
| 51 | 98.1  | 0.0 | 6.9 | 1.7 | 11.8 | 0.0 | 205.3 | 0.00 | 0.0419 | 0.0575 | 0.00 | 100.0 | 1.51·10 <sup>-4</sup> | 2.2 | Included | 13.05 | 11.625 | 87.4  |
| 52 | 95.3  | 0.0 | 9.2 | 2.6 | 12.7 | 0.0 | 209.7 | 0.00 | 0.0563 | 0.0606 | 0.00 | 100.0 | 2.03·10 <sup>-4</sup> | 2.9 | Included | 12.68 | 11.250 | 84.6  |



|    |      |       |      |      |      |     |       |         |        |        |      |       |                       |      |          |       |        |      |
|----|------|-------|------|------|------|-----|-------|---------|--------|--------|------|-------|-----------------------|------|----------|-------|--------|------|
| 53 | 92.5 | 0.0   | 9.4  | 2.3  | 13.2 | 0.0 | 193.2 | 0.00    | 0.0606 | 0.0683 | 0.00 | 100.0 | 2.18·10 <sup>-4</sup> | 3.2  | Included | 12.30 | 10.875 | 81.8 |
| 54 | 89.7 | 0.0   | 14.3 | 3.0  | 14.8 | 0.0 | 215.6 | 0.00    | 0.0802 | 0.0686 | 0.00 | 100.0 | 2.89·10 <sup>-4</sup> | 4.2  | Included | 11.93 | 10.500 | 78.9 |
| 55 | 86.8 | 0.0   | 14.1 | 4.0  | 14.6 | 0.0 | 201.4 | 0.00    | 0.0899 | 0.0725 | 0.00 | 100.0 | 3.24·10 <sup>-4</sup> | 4.7  | Included | 11.55 | 10.125 | 76.1 |
| 56 | 84.0 | 1.6   | 16.1 | 4.7  | 15.2 | 0.0 | 191.1 | 0.00837 | 0.109  | 0.0795 | 0.00 | 99.1  | 3.92·10 <sup>-4</sup> | 5.7  | Included | 11.18 | 9.750  | 73.3 |
| 57 | 81.2 | 2.3   | 19.2 | 5.3  | 18.1 | 0.0 | 216.2 | 0.0106  | 0.113  | 0.0837 | 0.00 | 98.9  | 4.08·10 <sup>-4</sup> | 5.9  | Included | 10.80 | 9.375  | 70.5 |
| 58 | 78.4 | 3.3   | 25.8 | 7.2  | 20.6 | 0.0 | 233.3 | 0.0141  | 0.141  | 0.0883 | 0.00 | 98.5  | 5.09·10 <sup>-4</sup> | 7.4  | Included | 10.43 | 9.000  | 67.7 |
| 59 | 75.6 | 3.2   | 24.0 | 6.9  | 17.8 | 0.0 | 190.6 | 0.0168  | 0.162  | 0.0934 | 0.00 | 98.2  | 5.84·10 <sup>-4</sup> | 8.5  | Included | 10.05 | 8.625  | 64.8 |
| 60 | 72.7 | 4.4   | 28.4 | 9.1  | 20.0 | 0.0 | 201.1 | 0.0219  | 0.186  | 0.0995 | 0.00 | 97.7  | 6.71·10 <sup>-4</sup> | 9.8  | Included | 9.68  | 8.250  | 62.0 |
| 61 | 69.9 | 5.2   | 30.5 | 10.3 | 19.4 | 0.0 | 189.5 | 0.0274  | 0.215  | 0.102  | 0.00 | 97.1  | 7.75·10 <sup>-4</sup> | 11.3 | Included | 9.30  | 7.875  | 59.2 |
| 62 | 67.1 | 7.5   | 39.0 | 13.3 | 22.2 | 0.0 | 206.4 | 0.0363  | 0.253  | 0.108  | 0.00 | 96.2  | 9.12·10 <sup>-4</sup> | 13.3 | Included | 8.93  | 7.500  | 56.4 |
| 63 | 64.3 | 9.3   | 42.9 | 15.8 | 22.5 | 0.0 | 199.5 | 0.0466  | 0.294  | 0.113  | 0.00 | 95.1  | 1.06·10 <sup>-3</sup> | 15.4 | Included | 8.55  | 7.125  | 53.6 |
| 64 | 61.5 | 11.7  | 48.2 | 18.6 | 23.5 | 0.0 | 210.4 | 0.0556  | 0.317  | 0.112  | 0.00 | 94.1  | 1.14·10 <sup>-3</sup> | 16.6 | Included | 8.18  | 6.750  | 50.8 |
| 65 | 58.6 | 13.8  | 50.0 | 20.6 | 23.0 | 0.0 | 196.0 | 0.0704  | 0.360  | 0.117  | 0.00 | 92.6  | 1.30·10 <sup>-3</sup> | 18.9 | Included | 7.80  | 6.375  | 47.9 |
| 66 | 55.8 | 17.5  | 56.0 | 24.1 | 23.7 | 0.0 | 196.5 | 0.0891  | 0.408  | 0.121  | 0.00 | 90.6  | 1.47·10 <sup>-3</sup> | 21.3 | Included | 7.43  | 6.000  | 45.1 |
| 67 | 53.0 | 20.5  | 58.7 | 26.2 | 23.0 | 0.0 | 192.7 | 0.106   | 0.441  | 0.119  | 0.00 | 88.8  | 1.59·10 <sup>-3</sup> | 23.1 | Included | 7.05  | 5.625  | 42.3 |
| 68 | 50.2 | 25.0  | 63.8 | 29.5 | 23.4 | 0.0 | 195.3 | 0.128   | 0.478  | 0.120  | 0.00 | 86.5  | 1.72·10 <sup>-3</sup> | 25.0 | Included | 6.68  | 5.250  | 39.5 |
| 69 | 47.4 | 31.0  | 69.6 | 33.4 | 24.1 | 0.0 | 196.6 | 0.158   | 0.524  | 0.123  | 0.00 | 83.4  | 1.89·10 <sup>-3</sup> | 27.4 | Included | 6.30  | 4.875  | 36.7 |
| 70 | 44.5 | 33.2  | 66.6 | 32.9 | 21.9 | 0.0 | 178.6 | 0.186   | 0.557  | 0.123  | 0.00 | 80.4  | 2.01·10 <sup>-3</sup> | 29.2 | Included | 5.93  | 4.500  | 33.8 |
| 71 | 41.7 | 43.5  | 75.1 | 38.2 | 23.3 | 0.0 | 197.5 | 0.220   | 0.574  | 0.118  | 0.00 | 76.8  | 2.07·10 <sup>-3</sup> | 30.0 | Included | 5.55  | 4.125  | 31.0 |
| 72 | 38.9 | 48.7  | 72.6 | 37.7 | 21.4 | 0.0 | 192.0 | 0.254   | 0.574  | 0.111  | 0.00 | 73.3  | 2.07·10 <sup>-3</sup> | 30.1 | Included | 5.18  | 3.750  | 28.2 |
| 73 | 36.1 | 62.3  | 77.8 | 41.5 | 21.9 | 0.0 | 205.0 | 0.304   | 0.582  | 0.107  | 0.00 | 68.0  | 2.10·10 <sup>-3</sup> | 30.5 | Included | 4.80  | 3.375  | 25.4 |
| 74 | 33.3 | 66.2  | 69.3 | 37.3 | 18.6 | 0.0 | 186.6 | 0.355   | 0.571  | 0.0997 | 0.00 | 62.6  | 2.06·10 <sup>-3</sup> | 29.9 | Included | 4.43  | 3.000  | 22.6 |
| 75 | 30.5 | 81.5  | 69.5 | 37.7 | 17.6 | 0.0 | 198.6 | 0.410   | 0.540  | 0.0886 | 0.00 | 56.8  | 1.94·10 <sup>-3</sup> | 28.3 | Included | 4.05  | 2.625  | 19.7 |
| 76 | 27.6 | 92.3  | 62.4 | 34.1 | 15.4 | 0.0 | 193.3 | 0.477   | 0.499  | 0.0797 | 0.00 | 49.7  | 1.80·10 <sup>-3</sup> | 26.1 | Included | 3.68  | 2.250  | 16.9 |
| 77 | 24.8 | 109.1 | 57.2 | 31.2 | 13.4 | 0.0 | 192.8 | 0.566   | 0.459  | 0.0695 | 0.00 | 40.4  | 1.65·10 <sup>-3</sup> | 24.0 | Included | 3.30  | 1.875  | 14.1 |
| 78 | 22.0 | 126.0 | 50.1 | 27.1 | 11.4 | 0.0 | 203.0 | 0.621   | 0.380  | 0.0562 | 0.00 | 34.6  | 1.37·10 <sup>-3</sup> | 19.9 | Included | 2.93  | 1.500  | 11.3 |
| 79 | 19.2 | 127.2 | 36.8 | 19.7 | 8.1  | 0.0 | 191.1 | 0.666   | 0.296  | 0.0424 | 0.00 | 29.9  | 1.06·10 <sup>-3</sup> | 15.5 | Included | 2.55  | 1.125  | 8.5  |
| 80 | 16.4 | 143.0 | 28.5 | 15.2 | 6.1  | 0.0 | 195.0 | 0.733   | 0.224  | 0.0313 | 0.00 | 22.8  | 8.07·10 <sup>-3</sup> | 11.7 | Included | 2.18  | 0.750  | 5.6  |
| 81 | 13.5 | 153.6 | 19.8 | 10.4 | 4.3  | 0.0 | 199.2 | 0.771   | 0.152  | 0.0216 | 0.00 | 18.8  | 5.46·10 <sup>-3</sup> | 7.9  | Included | 1.80  | 0.375  | 2.8  |

|    |      |       |      |     |     |     |       |       |         |         |      |      |                      |     |          |       |       |     |
|----|------|-------|------|-----|-----|-----|-------|-------|---------|---------|------|------|----------------------|-----|----------|-------|-------|-----|
| 82 | 10.7 | 157.2 | 12.1 | 6.4 | 2.6 | 0.0 | 186.8 | 0.842 | 0.0990  | 0.0139  | 0.00 | 11.4 | $3.57 \cdot 10^{-3}$ | 5.2 | Included | 1.43  | 0.000 | 0.0 |
| 83 | 7.9  | 148.8 | 6.5  | 3.4 | 1.4 | 0.0 | 175.5 | 0.848 | 0.0564  | 0.00798 | 0.00 | 10.7 | $2.03 \cdot 10^{-3}$ | 3.0 | Excluded | 1.05  | N/A   | N/A |
| 84 | 5.1  | 162.9 | 3.7  | 1.9 | 0.0 | 0.0 | 177.6 | 0.917 | 0.0315  | 0.00    | 0.00 | 3.4  | $1.14 \cdot 10^{-3}$ | 1.7 | Excluded | 0.68  | N/A   | N/A |
| 85 | 2.3  | 198.6 | 1.9  | 0.0 | 0.0 | 0.0 | 213.2 | 0.932 | 0.00891 | 0.00    | 0.00 | 1.9  | $3.21 \cdot 10^{-3}$ | 0.5 | Excluded | 0.30  | N/A   | N/A |
| 86 | -0.6 | 180.8 | 0.0  | 0.0 | 0.0 | 0.0 | 198.3 | 0.912 | 0.00    | 0.00    | 0.00 | 4.0  | 0.00                 | 0.0 | Excluded | -0.07 | N/A   | N/A |

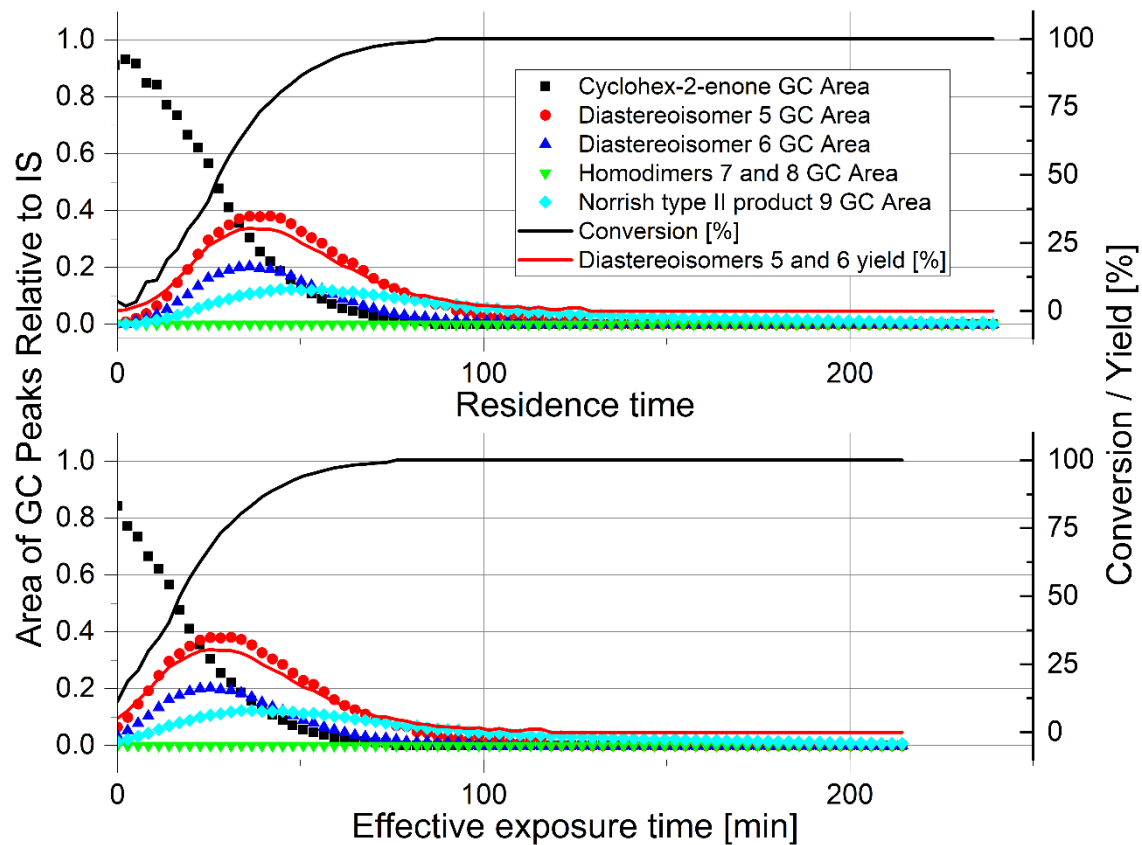

Figure S 12. Results of Switch-Off optimisation of [2+2] photoreaction using UV-B light. Top: Reaction components absolute GC areas, conversion, and yield plotted against uncorrected residence time. Bottom: Reaction components GC areas, conversion, and yield plotted against exposure time, corrected for light inhomogeneity.

### 2. 3. 2. 3. Switch-Off experiment results using UV-C light

Cyclohex-2-enone (125.0  $\mu$ L, 124.0 mg, 1.3 mmol, 1.0 eq., 25.8 mM solution), dibutyl ether (0.19 mL, 146.0 mg, 1.1 mmol, 0.85 eq., 22.4 mmol solution), and tetramethylethylene (3.01 mL, 2.13 g, 25.3 mmol, 19.6 eq., 505.7 mM solution) were dissolved in anhydrous acetonitrile (47.9 mL, 386.3 vol.). Obtained solution was sonicated under high nitrogen flow for 30 minutes and was then connected to flow reagents stream. Anhydrous acetonitrile, sonicated under high nitrogen flow for 30 minutes, was connected to flow solvents stream. The UV-C lamp (PISCES PLL 36W) and water cooling were then turned on and system was allowed to equilibrate for 30 minutes. Then reaction mixture was injected into the photoreactor (internal volume of 31.8 mL, 1.00 mm I.D., 1.60 mm O.D., PFA). Effective exposure time was set to 239 minutes (which corresponds to 0.133 mL/min flow rate). Once the photoreactor was filled with reaction mixture, the UV lamp was switched off, the pump was switched to solvent stream, the reaction mixture was eluted from the photoreactor, and was collected into vials (0.375 mL of reaction mixture, diluted to 1.0 mL with acetone). Collected samples were then analysed using off-line GC.

Table S 9. Results of Switch-Off optimisation performed for [2+2] photocycloaddition of cyclohex-2-enone and tetramethylethylene using UV-C light.

| Vial | Residence time | Cyclohex-2-enone GC Area | Diastereoisomer 5 GC Area | Diastereoisomer 6 GC Area | Norrish type II product 9 GC Area | Homodimers 7 and 8 GC Area | IS Area | Cyclohex-enone/IS Area ratio | Diastereoisomers 5 and 6/IS Area Ratio | Norrish type II product 9/IS Area Ratio | Homodimers 7 and 8/IS Area Ratio | Conversion [%] | Diastereoisomers 5 and 6 concentration [M] | Diastereoisomers 5 and 6 yield [%] | Datapoint included or excluded from analysis | Reactor Volume [mL] | Effective Reactor Volume [mL] | Effective Exposure Time [min] |
|------|----------------|--------------------------|---------------------------|---------------------------|-----------------------------------|----------------------------|---------|------------------------------|----------------------------------------|-----------------------------------------|----------------------------------|----------------|--------------------------------------------|------------------------------------|----------------------------------------------|---------------------|-------------------------------|-------------------------------|
| 1    | 239.1          | 0.0                      | 4.0                       | 0.0                       | 3.5                               | 0.0                        | 196.1   | 0.00                         | 0.0204                                 | 0.0178                                  | 0.00                             | 100.0%         | $7.43 \cdot 10^{-5}$                       | 1.1                                | Excluded                                     | 31.80               | N/A                           | N/A                           |
| 2    | 236.3          | 0.0                      | 4.0                       | 0.0                       | 4.3                               | 0.0                        | 246.3   | 0.00                         | 0.0162                                 | 0.0175                                  | 0.00                             | 100.0%         | $5.91 \cdot 10^{-5}$                       | 0.8                                | Excluded                                     | 31.43               | N/A                           | N/A                           |
| 3    | 233.5          | 0.0                      | 6.8                       | 0.0                       | 4.7                               | 0.0                        | 257.4   | 0.00                         | 0.0264                                 | 0.0183                                  | 0.00                             | 100.0%         | $9.62 \cdot 10^{-5}$                       | 1.4                                | Excluded                                     | 31.05               | N/A                           | N/A                           |
| 4    | 230.6          | 0.0                      | 5.8                       | 0.0                       | 4.6                               | 0.0                        | 249.5   | 0.00                         | 0.0232                                 | 0.0184                                  | 0.00                             | 100.0%         | $8.47 \cdot 10^{-5}$                       | 1.2                                | Excluded                                     | 30.68               | N/A                           | N/A                           |
| 5    | 227.8          | 0.0                      | 6.1                       | 0.0                       | 6.2                               | 0.0                        | 258.2   | 0.00                         | 0.0236                                 | 0.0240                                  | 0.00                             | 100.0%         | $8.60 \cdot 10^{-5}$                       | 1.2                                | Excluded                                     | 30.30               | N/A                           | N/A                           |
| 6    | 225.0          | 0.0                      | 6.0                       | 0.0                       | 6.1                               | 0.0                        | 251.5   | 0.00                         | 0.0239                                 | 0.0243                                  | 0.00                             | 100.0%         | $8.69 \cdot 10^{-5}$                       | 1.2                                | Included                                     | 29.93               | 28.500                        | 214.3                         |
| 7    | 222.2          | 0.0                      | 6.7                       | 0.0                       | 6.6                               | 0.0                        | 265.0   | 0.00                         | 0.0253                                 | 0.0249                                  | 0.00                             | 100.0%         | $9.21 \cdot 10^{-5}$                       | 1.3                                | Included                                     | 29.55               | 28.125                        | 211.5                         |
| 8    | 219.4          | 0.0                      | 6.8                       | 0.0                       | 6.7                               | 0.0                        | 264.7   | 0.00                         | 0.0257                                 | 0.0253                                  | 0.00                             | 100.0%         | $9.36 \cdot 10^{-5}$                       | 1.3                                | Included                                     | 29.18               | 27.750                        | 208.6                         |
| 9    | 216.5          | 0.0                      | 7.8                       | 0.0                       | 7.1                               | 0.0                        | 280.8   | 0.00                         | 0.0278                                 | 0.0253                                  | 0.00                             | 100.0%         | $1.01 \cdot 10^{-4}$                       | 1.4                                | Included                                     | 28.80               | 27.375                        | 205.8                         |
| 10   | 213.7          | 0.0                      | 7.9                       | 0.0                       | 7.2                               | 0.0                        | 273.8   | 0.00                         | 0.0289                                 | 0.0263                                  | 0.00                             | 100.0%         | $1.05 \cdot 10^{-4}$                       | 1.5                                | Included                                     | 28.43               | 27.000                        | 203.0                         |
| 11   | 210.9          | 0.0                      | 7.8                       | 0.0                       | 7.4                               | 0.0                        | 276.0   | 0.00                         | 0.0283                                 | 0.0268                                  | 0.00                             | 100.0%         | $1.03 \cdot 10^{-4}$                       | 1.5                                | Included                                     | 28.05               | 26.625                        | 200.2                         |
| 12   | 208.1          | 0.0                      | 8.7                       | 0.0                       | 7.9                               | 0.0                        | 294.0   | 0.00                         | 0.0296                                 | 0.0269                                  | 0.00                             | 100.0%         | $1.08 \cdot 10^{-4}$                       | 1.5                                | Included                                     | 27.68               | 26.250                        | 197.4                         |
| 13   | 205.3          | 0.0                      | 8.5                       | 0.0                       | 7.5                               | 0.0                        | 275.1   | 0.00                         | 0.0309                                 | 0.0273                                  | 0.00                             | 100.0%         | $1.13 \cdot 10^{-4}$                       | 1.6                                | Included                                     | 27.30               | 25.875                        | 194.5                         |
| 14   | 202.4          | 0.0                      | 9.8                       | 0.0                       | 8.1                               | 0.0                        | 282.7   | 0.00                         | 0.0347                                 | 0.0287                                  | 0.00                             | 100.0%         | $1.26 \cdot 10^{-4}$                       | 1.8                                | Included                                     | 26.93               | 25.500                        | 191.7                         |
| 15   | 199.6          | 0.0                      | 9.7                       | 0.0                       | 8.7                               | 0.0                        | 290.1   | 0.00                         | 0.0334                                 | 0.0300                                  | 0.00                             | 100.0%         | $1.22 \cdot 10^{-4}$                       | 1.7                                | Included                                     | 26.55               | 25.125                        | 188.9                         |
| 16   | 196.8          | 0.0                      | 9.7                       | 0.0                       | 8.6                               | 0.0                        | 280.9   | 0.00                         | 0.0345                                 | 0.0306                                  | 0.00                             | 100.0%         | $1.26 \cdot 10^{-4}$                       | 1.8                                | Included                                     | 26.18               | 24.750                        | 186.1                         |
| 17   | 194.0          | 0.0                      | 11.8                      | 0.0                       | 9.3                               | 0.0                        | 294.9   | 0.00                         | 0.0400                                 | 0.0315                                  | 0.00                             | 100.0%         | $1.46 \cdot 10^{-4}$                       | 2.1                                | Included                                     | 25.80               | 24.375                        | 183.3                         |

|    |       |     |      |     |      |     |       |      |        |        |      |        |                       |     |          |       |        |       |
|----|-------|-----|------|-----|------|-----|-------|------|--------|--------|------|--------|-----------------------|-----|----------|-------|--------|-------|
| 18 | 191.2 | 0.0 | 12.2 | 0.0 | 9.3  | 0.0 | 295.4 | 0.00 | 0.0413 | 0.0315 | 0.00 | 100.0% | 1.50·10 <sup>-4</sup> | 2.1 | Included | 25.43 | 24.000 | 180.5 |
| 19 | 188.3 | 0.0 | 12.7 | 0.0 | 9.4  | 0.0 | 287.7 | 0.00 | 0.0441 | 0.0327 | 0.00 | 100.0% | 1.61·10 <sup>-4</sup> | 2.3 | Included | 25.05 | 23.625 | 177.6 |
| 20 | 185.5 | 0.0 | 12.2 | 0.0 | 10.1 | 0.0 | 302.8 | 0.00 | 0.0403 | 0.0334 | 0.00 | 100.0% | 1.47·10 <sup>-4</sup> | 2.1 | Included | 24.68 | 23.250 | 174.8 |
| 21 | 182.7 | 0.0 | 13.0 | 0.0 | 8.4  | 0.0 | 285.3 | 0.00 | 0.0456 | 0.0294 | 0.00 | 100.0% | 1.66·10 <sup>-4</sup> | 2.4 | Included | 24.30 | 22.875 | 172.0 |
| 22 | 179.9 | 0.0 | 14.1 | 0.0 | 11.0 | 0.0 | 304.3 | 0.00 | 0.0463 | 0.0361 | 0.00 | 100.0% | 1.69·10 <sup>-4</sup> | 2.4 | Included | 23.93 | 22.500 | 169.2 |
| 23 | 177.1 | 0.0 | 13.8 | 0.0 | 10.8 | 0.0 | 289.9 | 0.00 | 0.0476 | 0.0373 | 0.00 | 100.0% | 1.73·10 <sup>-4</sup> | 2.5 | Included | 23.55 | 22.125 | 166.4 |
| 24 | 174.2 | 0.0 | 13.1 | 0.0 | 10.7 | 0.0 | 287.3 | 0.00 | 0.0456 | 0.0372 | 0.00 | 100.0% | 1.66·10 <sup>-4</sup> | 2.4 | Included | 23.18 | 21.750 | 163.5 |
| 25 | 171.4 | 0.0 | 14.6 | 0.0 | 9.6  | 0.0 | 288.5 | 0.00 | 0.0506 | 0.0333 | 0.00 | 100.0% | 1.84·10 <sup>-4</sup> | 2.6 | Included | 22.80 | 21.375 | 160.7 |
| 26 | 168.6 | 0.0 | 15.0 | 0.0 | 11.6 | 0.0 | 289.0 | 0.00 | 0.0519 | 0.0401 | 0.00 | 100.0% | 1.89·10 <sup>-4</sup> | 2.7 | Included | 22.43 | 21.000 | 157.9 |
| 27 | 165.8 | 0.0 | 16.4 | 0.0 | 12.7 | 0.0 | 306.2 | 0.00 | 0.0536 | 0.0415 | 0.00 | 100.0% | 1.95·10 <sup>-4</sup> | 2.8 | Included | 22.05 | 20.625 | 155.1 |
| 28 | 163.0 | 0.0 | 16.4 | 0.0 | 12.4 | 0.0 | 285.2 | 0.00 | 0.0575 | 0.0435 | 0.00 | 100.0% | 2.09·10 <sup>-4</sup> | 3.0 | Included | 21.68 | 20.250 | 152.3 |
| 29 | 160.2 | 0.0 | 16.2 | 0.0 | 12.8 | 0.0 | 283.4 | 0.00 | 0.0572 | 0.0452 | 0.00 | 100.0% | 2.08·10 <sup>-4</sup> | 3.0 | Included | 21.30 | 19.875 | 149.4 |
| 30 | 157.3 | 0.0 | 17.7 | 0.0 | 13.7 | 0.0 | 296.5 | 0.00 | 0.0597 | 0.0462 | 0.00 | 100.0% | 2.17·10 <sup>-4</sup> | 3.1 | Included | 20.93 | 19.500 | 146.6 |
| 31 | 154.5 | 0.0 | 17.8 | 1.1 | 13.4 | 0.0 | 286.5 | 0.00 | 0.0660 | 0.0468 | 0.00 | 100.0% | 2.40·10 <sup>-4</sup> | 3.4 | Included | 20.55 | 19.125 | 143.8 |
| 32 | 151.7 | 0.0 | 18.9 | 1.1 | 14.1 | 0.0 | 297.3 | 0.00 | 0.0673 | 0.0474 | 0.00 | 100.0% | 2.45·10 <sup>-4</sup> | 3.5 | Included | 20.18 | 18.750 | 141.0 |
| 33 | 148.9 | 0.0 | 18.3 | 1.3 | 14.6 | 0.0 | 296.0 | 0.00 | 0.0662 | 0.0493 | 0.00 | 100.0% | 2.41·10 <sup>-4</sup> | 3.4 | Included | 19.80 | 18.375 | 138.2 |
| 34 | 146.1 | 0.0 | 20.1 | 1.4 | 15.3 | 0.0 | 300.6 | 0.00 | 0.0715 | 0.0509 | 0.00 | 100.0% | 2.60·10 <sup>-4</sup> | 3.7 | Included | 19.43 | 18.000 | 135.3 |
| 35 | 143.2 | 0.0 | 18.8 | 1.4 | 14.8 | 0.0 | 289.6 | 0.00 | 0.0698 | 0.0511 | 0.00 | 100.0% | 2.54·10 <sup>-4</sup> | 3.6 | Included | 19.05 | 17.625 | 132.5 |
| 36 | 140.4 | 0.0 | 20.0 | 1.6 | 15.7 | 0.0 | 294.9 | 0.00 | 0.0732 | 0.0532 | 0.00 | 100.0% | 2.67·10 <sup>-4</sup> | 3.8 | Included | 18.68 | 17.250 | 129.7 |
| 37 | 137.6 | 0.0 | 20.7 | 1.8 | 15.7 | 0.0 | 281.4 | 0.00 | 0.0800 | 0.0558 | 0.00 | 100.0% | 2.91·10 <sup>-4</sup> | 4.1 | Included | 18.30 | 16.875 | 126.9 |
| 38 | 134.8 | 0.0 | 21.6 | 1.9 | 16.2 | 0.0 | 288.2 | 0.00 | 0.0815 | 0.0562 | 0.00 | 100.0% | 2.97·10 <sup>-4</sup> | 4.2 | Included | 17.93 | 16.500 | 124.1 |
| 39 | 132.0 | 0.0 | 21.7 | 2.1 | 16.6 | 0.0 | 288.0 | 0.00 | 0.0826 | 0.0576 | 0.00 | 100.0% | 3.01·10 <sup>-4</sup> | 4.3 | Included | 17.55 | 16.125 | 121.2 |
| 40 | 129.1 | 0.0 | 21.1 | 2.2 | 16.0 | 0.0 | 274.3 | 0.00 | 0.0849 | 0.0583 | 0.00 | 100.0% | 3.09·10 <sup>-4</sup> | 4.4 | Included | 17.18 | 15.750 | 118.4 |
| 41 | 126.3 | 0.0 | 24.3 | 2.7 | 18.3 | 0.0 | 309.8 | 0.00 | 0.0872 | 0.0591 | 0.00 | 100.0% | 3.17·10 <sup>-4</sup> | 4.5 | Included | 16.80 | 15.375 | 115.6 |
| 42 | 123.5 | 0.0 | 22.8 | 2.7 | 17.5 | 0.0 | 279.6 | 0.00 | 0.0912 | 0.0626 | 0.00 | 100.0% | 3.32·10 <sup>-4</sup> | 4.7 | Included | 16.43 | 15.000 | 112.8 |
| 43 | 120.7 | 0.0 | 22.8 | 2.9 | 14.8 | 0.0 | 245.6 | 0.00 | 0.105  | 0.0603 | 0.00 | 100.0% | 3.81·10 <sup>-4</sup> | 5.4 | Included | 16.05 | 14.625 | 110.0 |
| 44 | 117.9 | 0.0 | 25.0 | 3.4 | 18.6 | 0.0 | 292.2 | 0.00 | 0.0972 | 0.0637 | 0.00 | 100.0% | 3.54·10 <sup>-4</sup> | 5.0 | Included | 15.68 | 14.250 | 107.1 |
| 45 | 115.0 | 0.0 | 25.5 | 3.7 | 18.8 | 0.0 | 283.9 | 0.00 | 0.103  | 0.0662 | 0.00 | 100.0% | 3.75·10 <sup>-4</sup> | 5.3 | Included | 15.30 | 13.875 | 104.3 |
| 46 | 112.2 | 0.0 | 26.0 | 4.0 | 19.0 | 0.0 | 281.4 | 0.00 | 0.107  | 0.0675 | 0.00 | 100.0% | 3.88·10 <sup>-4</sup> | 5.5 | Included | 14.93 | 13.500 | 101.5 |

|    |       |      |      |      |      |     |       |         |       |        |      |        |                       |      |          |       |        |      |
|----|-------|------|------|------|------|-----|-------|---------|-------|--------|------|--------|-----------------------|------|----------|-------|--------|------|
| 47 | 109.4 | 0.0  | 30.1 | 4.9  | 22.3 | 0.0 | 317.1 | 0.00    | 0.110 | 0.0703 | 0.00 | 100.0% | 4.02·10 <sup>-4</sup> | 5.7  | Included | 14.55 | 13.125 | 98.7 |
| 48 | 106.6 | 0.0  | 28.4 | 5.0  | 20.5 | 0.0 | 288.0 | 0.00    | 0.116 | 0.0712 | 0.00 | 100.0% | 4.22·10 <sup>-4</sup> | 6.0  | Included | 14.18 | 12.750 | 95.9 |
| 49 | 103.8 | 0.0  | 28.8 | 5.4  | 20.5 | 0.0 | 283.2 | 0.00    | 0.121 | 0.0724 | 0.00 | 100.0% | 4.40·10 <sup>-4</sup> | 6.2  | Included | 13.80 | 12.375 | 93.0 |
| 50 | 100.9 | 0.0  | 28.1 | 5.6  | 19.7 | 0.0 | 262.7 | 0.00    | 0.128 | 0.0750 | 0.00 | 100.0% | 4.67·10 <sup>-4</sup> | 6.6  | Included | 13.43 | 12.000 | 90.2 |
| 51 | 98.1  | 0.0  | 32.4 | 6.8  | 22.4 | 0.0 | 298.1 | 0.00    | 0.131 | 0.0751 | 0.00 | 100.0% | 4.79·10 <sup>-4</sup> | 6.8  | Included | 13.05 | 11.625 | 87.4 |
| 52 | 95.3  | 0.0  | 32.1 | 7.2  | 22.1 | 0.0 | 290.2 | 0.00    | 0.135 | 0.0762 | 0.00 | 100.0% | 4.93·10 <sup>-4</sup> | 7.0  | Included | 12.68 | 11.250 | 84.6 |
| 53 | 92.5  | 0.0  | 34.0 | 8.0  | 22.5 | 0.0 | 289.8 | 0.00    | 0.145 | 0.0776 | 0.00 | 100.0% | 5.28·10 <sup>-4</sup> | 7.5  | Included | 12.30 | 10.875 | 81.8 |
| 54 | 89.7  | 0.0  | 36.2 | 9.1  | 25.1 | 0.0 | 299.1 | 0.00    | 0.151 | 0.0839 | 0.00 | 100.0% | 5.52·10 <sup>-4</sup> | 7.8  | Included | 11.93 | 10.500 | 78.9 |
| 55 | 86.8  | 0.0  | 34.1 | 9.2  | 20.9 | 0.0 | 276.6 | 0.00    | 0.157 | 0.0756 | 0.00 | 100.0% | 5.70·10 <sup>-4</sup> | 8.1  | Included | 11.55 | 10.125 | 76.1 |
| 56 | 84.0  | 0.0  | 37.1 | 10.5 | 24.1 | 0.0 | 285.8 | 0.00    | 0.167 | 0.0843 | 0.00 | 100.0% | 6.07·10 <sup>-4</sup> | 8.6  | Included | 11.18 | 9.750  | 73.3 |
| 57 | 81.2  | 0.0  | 38.6 | 11.5 | 25.6 | 0.0 | 286.5 | 0.00    | 0.175 | 0.0894 | 0.00 | 100.0% | 6.37·10 <sup>-4</sup> | 9.0  | Included | 10.80 | 9.375  | 70.5 |
| 58 | 78.4  | 0.0  | 39.5 | 12.5 | 25.6 | 0.0 | 292.6 | 0.00    | 0.178 | 0.0875 | 0.00 | 100.0% | 6.47·10 <sup>-4</sup> | 9.2  | Included | 10.43 | 9.000  | 67.7 |
| 59 | 75.6  | 0.0  | 41.6 | 13.9 | 27.4 | 0.0 | 293.2 | 0.00    | 0.189 | 0.0935 | 0.00 | 100.0% | 6.89·10 <sup>-4</sup> | 9.8  | Included | 10.05 | 8.625  | 64.8 |
| 60 | 72.7  | 0.0  | 41.5 | 14.7 | 25.0 | 0.0 | 287.6 | 0.00    | 0.195 | 0.0869 | 0.00 | 100.0% | 7.12·10 <sup>-4</sup> | 10.1 | Included | 9.68  | 8.250  | 62.0 |
| 61 | 69.9  | 0.0  | 43.9 | 16.5 | 25.9 | 0.0 | 292.2 | 0.00    | 0.207 | 0.0886 | 0.00 | 100.0% | 7.53·10 <sup>-4</sup> | 10.7 | Included | 9.30  | 7.875  | 59.2 |
| 62 | 67.1  | 0.0  | 44.8 | 17.5 | 26.8 | 0.0 | 281.3 | 0.00    | 0.221 | 0.0953 | 0.00 | 100.0% | 8.07·10 <sup>-4</sup> | 11.5 | Included | 8.93  | 7.500  | 56.4 |
| 63 | 64.3  | 0.0  | 38.2 | 16.2 | 22.2 | 0.0 | 233.3 | 0.00    | 0.233 | 0.0952 | 0.00 | 100.0% | 8.49·10 <sup>-4</sup> | 12.1 | Included | 8.55  | 7.125  | 53.6 |
| 64 | 61.5  | 0.0  | 51.8 | 22.6 | 29.2 | 0.0 | 292.6 | 0.00    | 0.254 | 0.0998 | 0.00 | 100.0% | 9.26·10 <sup>-4</sup> | 13.2 | Included | 8.18  | 6.750  | 50.8 |
| 65 | 58.6  | 0.0  | 40.6 | 18.9 | 21.5 | 0.0 | 232.0 | 0.00    | 0.256 | 0.0927 | 0.00 | 100.0% | 9.34·10 <sup>-4</sup> | 13.3 | Included | 7.80  | 6.375  | 47.9 |
| 66 | 55.8  | 0.0  | 52.3 | 25.2 | 28.0 | 0.0 | 285.3 | 0.00    | 0.272 | 0.0981 | 0.00 | 99.2%  | 9.89·10 <sup>-4</sup> | 14.1 | Included | 7.43  | 6.000  | 45.1 |
| 67 | 53.0  | 1.9  | 53.4 | 27.3 | 27.3 | 0.0 | 282.2 | 0.00673 | 0.286 | 0.0967 | 0.00 | 99.3%  | 1.04·10 <sup>-3</sup> | 14.8 | Included | 7.05  | 5.625  | 42.3 |
| 68 | 50.2  | 1.7  | 52.1 | 27.8 | 27.1 | 0.0 | 261.0 | 0.00651 | 0.306 | 0.104  | 0.00 | 99.0%  | 1.11·10 <sup>-3</sup> | 15.8 | Included | 6.68  | 5.250  | 39.5 |
| 69 | 47.4  | 2.2  | 48.8 | 27.2 | 24.0 | 0.0 | 239.3 | 0.00919 | 0.318 | 0.100  | 0.00 | 99.1%  | 1.16·10 <sup>-3</sup> | 16.4 | Included | 6.30  | 4.875  | 36.7 |
| 70 | 44.5  | 2.3  | 61.3 | 35.3 | 28.3 | 0.0 | 290.3 | 0.00792 | 0.333 | 0.0975 | 0.00 | 98.4%  | 1.21·10 <sup>-3</sup> | 17.2 | Included | 5.93  | 4.500  | 33.8 |
| 71 | 41.7  | 4.0  | 62.7 | 37.2 | 28.0 | 0.0 | 281.8 | 0.0142  | 0.355 | 0.0994 | 0.00 | 97.4%  | 1.29·10 <sup>-3</sup> | 18.3 | Included | 5.55  | 4.125  | 31.0 |
| 72 | 38.9  | 5.4  | 54.8 | 33.3 | 23.8 | 0.0 | 231.5 | 0.0233  | 0.381 | 0.103  | 0.00 | 96.0%  | 1.39·10 <sup>-3</sup> | 19.7 | Included | 5.18  | 3.750  | 28.2 |
| 73 | 36.1  | 10.1 | 68.6 | 42.1 | 28.7 | 0.0 | 282.3 | 0.0358  | 0.392 | 0.102  | 0.00 | 93.3%  | 1.43·10 <sup>-3</sup> | 20.3 | Included | 4.80  | 3.375  | 25.4 |
| 74 | 33.3  | 16.5 | 67.5 | 41.5 | 27.4 | 0.0 | 275.7 | 0.0598  | 0.395 | 0.0994 | 0.00 | 88.0%  | 1.44·10 <sup>-3</sup> | 20.5 | Included | 4.43  | 3.000  | 22.6 |
| 75 | 30.5  | 25.2 | 61.8 | 37.9 | 24.8 | 0.0 | 234.1 | 0.108   | 0.426 | 0.106  | 0.00 | 82.2%  | 1.55·10 <sup>-3</sup> | 22.0 | Included | 4.05  | 2.625  | 19.7 |

|    |      |       |      |      |      |     |       |       |        |         |      |       |                       |      |          |      |       |      |
|----|------|-------|------|------|------|-----|-------|-------|--------|---------|------|-------|-----------------------|------|----------|------|-------|------|
| 76 | 27.6 | 42.9  | 70.4 | 42.5 | 27.7 | 0.0 | 269.9 | 0.159 | 0.418  | 0.103   | 0.00 | 75.5% | 1.52·10 <sup>-3</sup> | 21.6 | Included | 3.68 | 2.250 | 16.9 |
| 77 | 24.8 | 61.1  | 65.4 | 38.8 | 25.4 | 0.0 | 278.6 | 0.219 | 0.374  | 0.0912  | 0.00 | 65.7% | 1.36·10 <sup>-3</sup> | 19.3 | Included | 3.30 | 1.875 | 14.1 |
| 78 | 22.0 | 80.7  | 58.0 | 33.8 | 21.7 | 0.0 | 263.3 | 0.306 | 0.349  | 0.0824  | 0.00 | 54.8% | 1.27·10 <sup>-3</sup> | 18.0 | Included | 2.93 | 1.500 | 11.3 |
| 79 | 19.2 | 101.7 | 50.1 | 28.7 | 18.4 | 0.0 | 252.0 | 0.404 | 0.313  | 0.0730  | 0.00 | 43.7% | 1.14·10 <sup>-3</sup> | 16.2 | Included | 2.55 | 1.125 | 8.5  |
| 80 | 16.4 | 154.5 | 57.8 | 28.9 | 19.0 | 0.0 | 307.1 | 0.503 | 0.282  | 0.0619  | 0.00 | 33.5% | 1.03·10 <sup>-3</sup> | 14.6 | Included | 2.18 | 0.750 | 5.6  |
| 81 | 13.5 | 164.2 | 37.0 | 20.5 | 13.7 | 0.0 | 276.3 | 0.594 | 0.208  | 0.0496  | 0.00 | 22.0% | 7.58·10 <sup>-4</sup> | 10.8 | Included | 1.80 | 0.375 | 2.8  |
| 82 | 10.7 | 156.5 | 23.7 | 13.0 | 8.7  | 0.0 | 224.5 | 0.697 | 0.163  | 0.0388  | 0.00 | 13.2% | 5.95·10 <sup>-4</sup> | 8.5  | Included | 1.43 | 0.000 | 0.0  |
| 83 | 7.9  | 219.8 | 23.6 | 11.4 | 7.3  | 0.0 | 283.5 | 0.775 | 0.123  | 0.0257  | 0.00 | 9.5%  | 4.50·10 <sup>-4</sup> | 6.4  | Excluded | 1.05 | N/A   | N/A  |
| 84 | 5.1  | 241.8 | 15.2 | 7.3  | 4.7  | 0.0 | 299.0 | 0.809 | 0.0753 | 0.0157  | 0.00 | 2.5%  | 2.74·10 <sup>-4</sup> | 3.9  | Excluded | 0.68 | N/A   | N/A  |
| 85 | 2.3  | 267.8 | 9.3  | 4.4  | 2.9  | 0.0 | 307.5 | 0.871 | 0.0446 | 0.00943 | 0.00 | 2.9%  | 1.62·10 <sup>-4</sup> | 2.3  | Excluded | 0.30 | N/A   | N/A  |
| 86 | -0.6 | 255.4 | 4.1  | 2.0  | 1.3  | 0.0 | 294.2 | 0.868 | 0.0207 | 0.00442 | 0.00 | 1.1%  | 7.55·10 <sup>-5</sup> | 1.1  | Excluded | 0.00 | N/A   | N/A  |

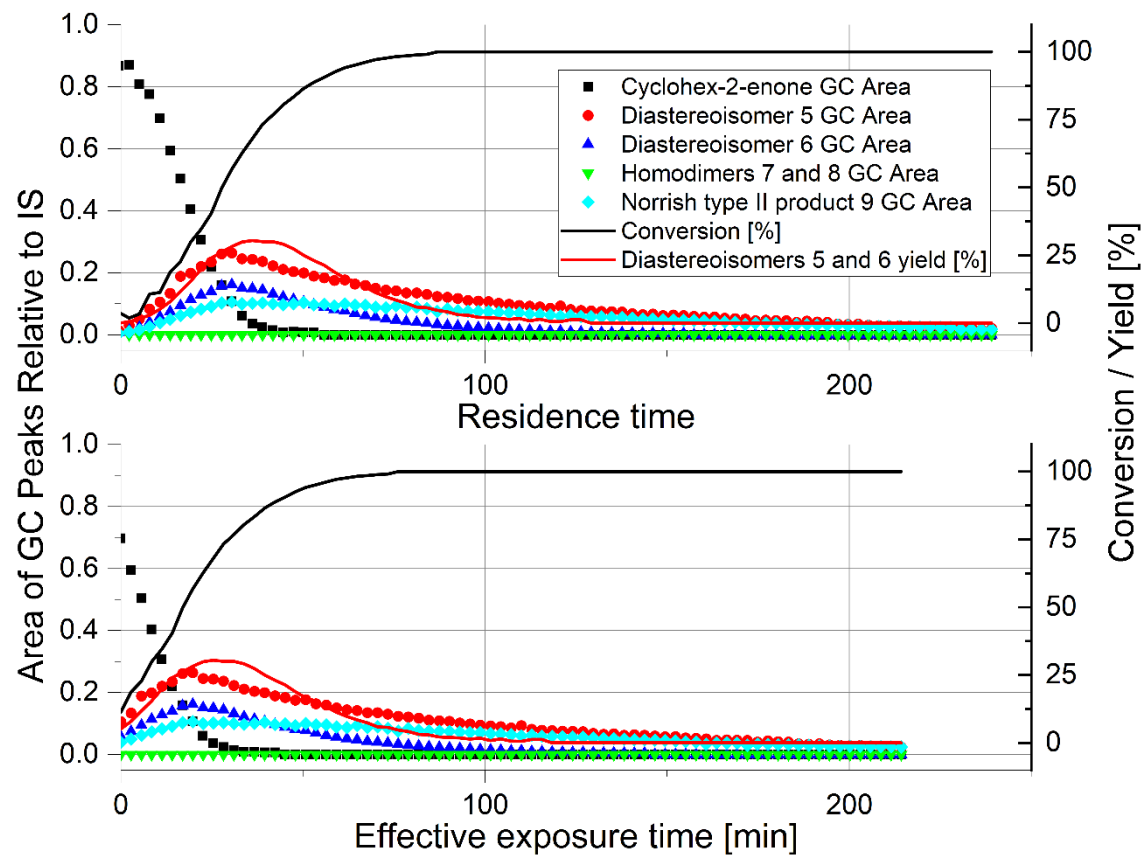

Figure S 13. Results of Switch-Off optimisation of [2+2] photoreaction using UV-C light. Top: Reaction components absolute GC areas, conversion, and yield plotted against uncorrected residence time. Bottom: Reaction components GC areas, conversion, and yield plotted against exposure time, corrected for light inhomogeneity.

### 2. 3. 3. Validation of Switch-Off results obtained in [2+2] photocycloaddition cyclohex-2-enone and tetramethylethylene

A reaction utilizing UV-A irradiation and 50 minutes of effective exposure time was performed in order to validate results obtained from the Switch-Off optimisation and perform full characterisation of reaction products.

To a 250.0 mL round-bottom flask flushed with nitrogen, cyclohex-2-enone (536.5 mg, 532.4  $\mu$ L, 5.58 mmol, 1.0 eq., 25.4 mM solution), tetramethylethylene (9.2451 g, 13.0673 mL, 109.85 mmol, 19.7 eq., 499.3 mM solution), dibutyl ether (internal standard, 628.9 mg, 816.8  $\mu$ L, 4.83 mmol, 0.87 eq., 22.0 mM solution) and anhydrous acetonitrile (205.6 mL, 383.2 vol.) were added and resulting mixture was sonicated under high nitrogen flow for 15 minutes in order to remove oxygen from solution. Effective exposure time of 50 minutes was set (corresponding to 0.569 mL/min total flow rate) and mixture was injected into the photoreactor (31.8 mL internal volume, 1.00 mm ID, 1.60 mm OD, PFA) equipped with UV-A lamp (Philips PLL 36W). Once the 195.0 mL of the mixture was entirely injected, it was eluted using acetonitrile (anhydrous and deoxygenated) out of the flow system. After collection of reaction mixture, solvent was removed, obtained residue was purified by column chromatography ( $\text{SiO}_2$ ; toluene: $\text{Et}_2\text{O}$  100:0 to 75:25 then  $\text{Et}_2\text{O}$ , then pure  $\text{Et}_2\text{O}$ ) and then by automated column chromatography system (Biotage Selekt, Biotage HP-Sphere 25 micron). Following products were obtained:

- *trans*-7,7,8,8-Tetramethylbicyclo[4.2.0]octan-2-one (**5**): 404.1 mg (2.24 mmol, 45.3% yield)
- *cis*-7,7,8,8-Tetramethylbicyclo[4.2.0]octan-2-one (**6**): 153.1 mg (0.85 mmol, 17.1% yield)
- *cis-anti-cis*-Tricyclo[6.4.0.0<sup>2,7</sup>]dodecane-3,12-dione (**7**): 27.9 mg (0.15 mmol, 2.9% yield)
- *cis-anti-cis*-Tricyclo[6.4.0.0<sup>2,7</sup>]dodecane-3,9-dione (**8**): 17.2 mg (0.09 mmol, 1.8% yield)
- 3-(1,1,2-Trimethyl-2-propen-1-yl)cyclohexanone (**9**): 67.4 mg (0.37 mmol, 7.5% yield)

Additionally, crude  $^1\text{H}$  NMR showed traces of Norrish type I products and traces of additional unknown byproducts. Full characterisation data of the compounds **5**, **6**, **7**, **8**, and **9** can be found in section 3. 2. Procedure for synthesis of compounds 5, 6, 7, 8, and 9: of this document.

### 2. 4. Mallory photocyclization of *cis*-stilbene

An example of GC chromatogram containing all studied Mallory photoreaction components with their respective retention times is presented below (Figure S 14. GC chromatogram of a Mallory photoreaction components with their respective retention times.).



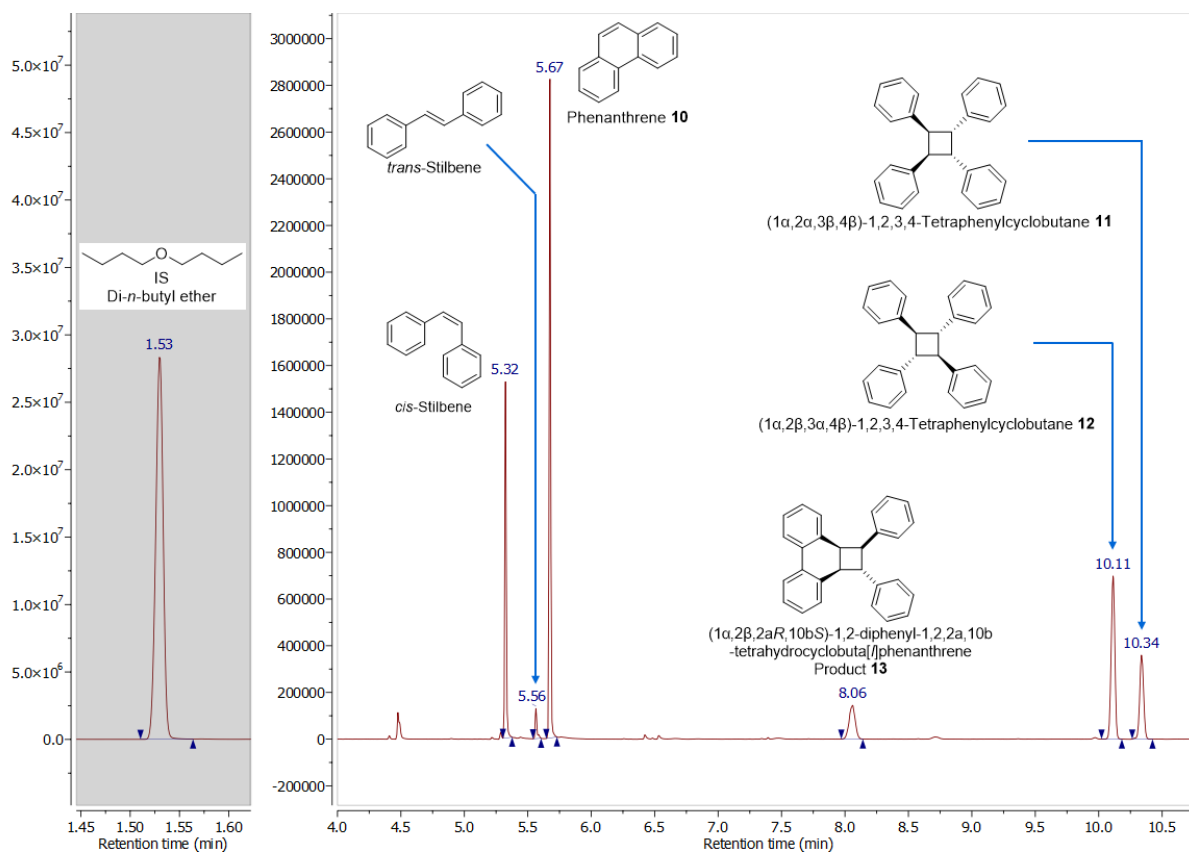

Figure S 14. GC chromatogram of a Mallory photoreaction components with their respective retention times.

#### 2. 4. 1. Calibration curve for determination of phenanthrene yield using GC-FID monitoring:

Sample solutions of dibutyl ether (internal standard) and phenanthrene 10 (photocycloaddition product) were prepared accordingly to the table below and were then measured using GC-FID. Calibration curve was then prepared by plotting the ratios of phenanthrene and IS areas against molar ratios of phenanthrene and IS.

Table S 10. Calibration table of GC-FID for Mallory photoreaction.

| Sam<br>ple | Mass of phenanth<br>rene [mg] | Mass of IS<br>[mg] | Moles of phenanth<br>rene<br>[mol] | Moles of IS<br>[mol] | Molar ratio of<br>phenanthrene<br>/IS | Area of phenanth<br>rene peak | Area of IS<br>peak | Area ratio of<br>phenanthrene<br>/IS |
|------------|-------------------------------|--------------------|------------------------------------|----------------------|---------------------------------------|-------------------------------|--------------------|--------------------------------------|
| 1          | 1.00                          | 3.10               | $5.61 \cdot 10^{-6}$               | $2.38 \cdot 10^{-5}$ | <b>0.235705</b>                       | 174.80                        | 481.70             | <b>0.362881</b>                      |
| 2          | 1.02                          | 5.45               | $5.72 \cdot 10^{-6}$               | $4.18 \cdot 10^{-5}$ | <b>0.136752</b>                       | 253.90                        | 1233.70            | <b>0.205804</b>                      |
| 3          | 1.40                          | 5.57               | $7.86 \cdot 10^{-6}$               | $4.28 \cdot 10^{-5}$ | <b>0.183655</b>                       | 365.00                        | 1336.20            | <b>0.273163</b>                      |
| 4          | 1.00                          | 3.50               | $5.61 \cdot 10^{-6}$               | $2.69 \cdot 10^{-5}$ | <b>0.208767</b>                       | 207.50                        | 654.70             | <b>0.316939</b>                      |

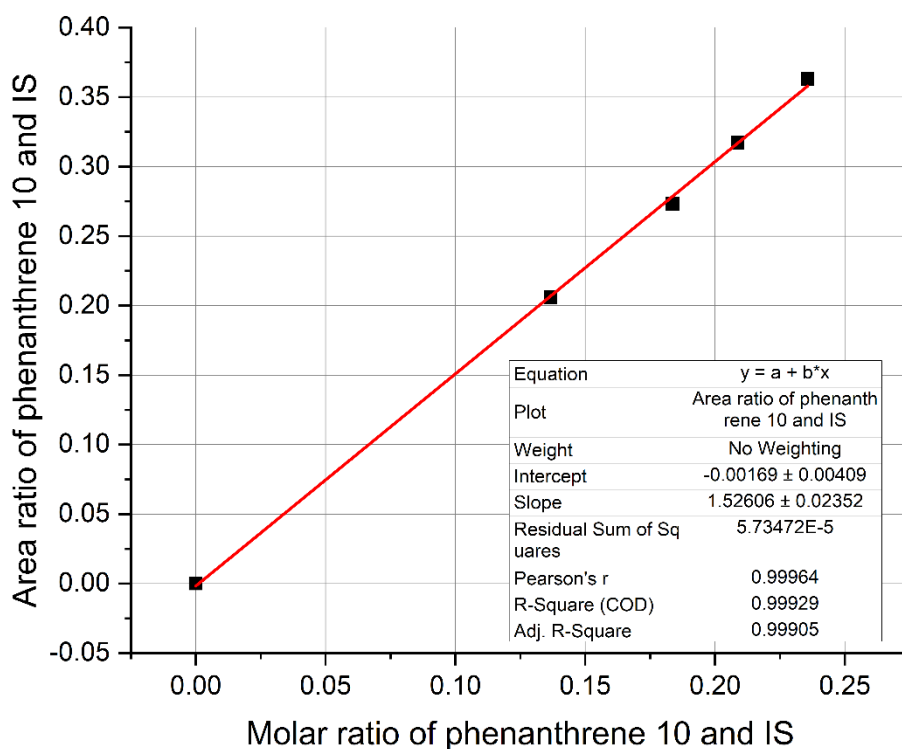

Figure S 15. GC-FID calibration curve of phenanthrene.

The FID detector is a mass sensitive detector and its response factor for simple hydrocarbons is generally proportional to the number of carbons in the measured molecule, thus the yields of dimers **11**, **12** and phenanthrene-stilbene photoaddition product **13** were determined using the phenanthrene **10** calibration curve, but since the compounds **11**, **12**, and **13** possess twice the number of carbons, the calculated dimers concentrations were additionally divided by half.

## 2. 4. 2. Mallory photoreaction Switch-Off optimisations results

### 2. 4. 2. 1. Switch-Off experiment results using UV-A light and 5.0 mM stilbene concentration

*Cis*-stilbene (44.5  $\mu$ L, 45.0 mg, 0.25 mmol, 1.0 eq., 5.0 mM solution), iodine (6.3 mg, 0.025 mmol, 0.1 eq., 0.5 mM solution), and dibutyl ether (0.15 mL, 117.1 mg, 0.90 mmol, 3.6 eq., 18.0 mM solution) were dissolved in cyclohexane (50.0 mL, 1111.1 vol.), obtained solution was saturated with oxygen by bubbling gaseous O<sub>2</sub> for 15 minutes, and then connected to flow reagents stream. Cyclohexane was connected to flow solvents stream. The UV-A lamp (Philips PLL 36W) and water cooling were then turned on and system was allowed to equilibrate for 30 minutes. Then reaction mixture was injected into the photoreactor (internal volume of 31.8 mL, 1.00 mm I.D., 1.60 mm O.D., PFA). Effective exposure time was set to 45 minutes (which corresponds to 0.707 mL/min flow rate). Once the photoreactor was filled with reaction mixture, the UV lamp was switched off, the pump was switched to solvent stream, the reaction mixture was eluted from the photoreactor, and was collected into vials (0.375 mL of reaction mixture, diluted to 1.0 mL with acetone). Collected samples were then analysed using off-line GC.

Table S 11. Results of Switch-Off optimisation performed for Mallory reaction of *cis*-stilbene using UV-A light and 5.0 mM stilbene concentration.

| #  | Residence time [min] | Light output [%] | Effective exposure time [min] | IS GC Area | Area Ratio <i>cis</i> -Stilbene/IS | Area Ratio <i>trans</i> -Stilbene/IS | Area Ratio Phenanthrene 10/IS | Area Ratio Dimer ABAB 12/IS | Area Ratio Dimer AABB 11/IS | Area Ratio Product 13/IS | Phenanthrene yield [%] | Dimer 12 yield [%] | Dimer 11 yield [%] | Product 13 yield [%] | <i>trans</i> -Stilbene yield [%] | Remaining <i>cis</i> -Stilbene [%] |
|----|----------------------|------------------|-------------------------------|------------|------------------------------------|--------------------------------------|-------------------------------|-----------------------------|-----------------------------|--------------------------|------------------------|--------------------|--------------------|----------------------|----------------------------------|------------------------------------|
| 1  | 45.0                 | 0.0              | 44.3                          | 48403      | 1.45·10 <sup>-4</sup>              | 0.00                                 | 4.49·10 <sup>-1</sup>         | 3.33·10 <sup>-3</sup>       | 1.45·10 <sup>-3</sup>       | 7.65·10 <sup>-5</sup>    | 98.5%                  | 0.77%              | 0.34%              | 0.02%                | 0.00%                            | 0.03%                              |
| 2  | 44.4                 | 3.4              | 44.3                          | 46903      | 1.07·10 <sup>-4</sup>              | 0.00                                 | 4.53·10 <sup>-1</sup>         | 3.39·10 <sup>-3</sup>       | 1.51·10 <sup>-3</sup>       | 0.00                     | 99.2%                  | 0.79%              | 0.35%              | 0.00%                | 0.00%                            | 0.02%                              |
| 3  | 43.9                 | 15.0             | 44.3                          | 47070      | 1.49·10 <sup>-4</sup>              | 0.00                                 | 4.51·10 <sup>-1</sup>         | 3.42·10 <sup>-3</sup>       | 1.59·10 <sup>-3</sup>       | 2.36·10 <sup>-4</sup>    | 98.8%                  | 0.79%              | 0.37%              | 0.05%                | 0.00%                            | 0.03%                              |
| 4  | 43.4                 | 26.6             | 44.2                          | 47110      | 2.12·10 <sup>-4</sup>              | 0.00                                 | 4.51·10 <sup>-1</sup>         | 3.31·10 <sup>-3</sup>       | 1.42·10 <sup>-3</sup>       | 0.00                     | 98.9%                  | 0.77%              | 0.33%              | 0.00%                | 0.00%                            | 0.05%                              |
| 5  | 42.9                 | 49.7             | 44.1                          | 49412      | 2.02·10 <sup>-4</sup>              | 0.00                                 | 4.52·10 <sup>-1</sup>         | 3.3·10 <sup>-3</sup>        | 1.48·10 <sup>-3</sup>       | 1.50·10 <sup>-4</sup>    | 99.0%                  | 0.78%              | 0.34%              | 0.03%                | 0.00%                            | 0.04%                              |
| 6  | 42.3                 | 70.8             | 43.8                          | 46756      | 1.92·10 <sup>-4</sup>              | 0.00                                 | 4.49·10 <sup>-1</sup>         | 3.38·10 <sup>-3</sup>       | 1.60·10 <sup>-3</sup>       | 1.58·10 <sup>-4</sup>    | 98.4%                  | 0.78%              | 0.37%              | 0.04%                | 0.00%                            | 0.04%                              |
| 7  | 41.8                 | 77.9             | 43.4                          | 50112      | 2.79·10 <sup>-4</sup>              | 0.00                                 | 4.51·10 <sup>-1</sup>         | 3.31·10 <sup>-3</sup>       | 1.52·10 <sup>-3</sup>       | 2.22·10 <sup>-4</sup>    | 98.9%                  | 0.77%              | 0.35%              | 0.05%                | 0.00%                            | 0.06%                              |
| 8  | 41.3                 | 85.0             | 43.0                          | 47022      | 2.55·10 <sup>-4</sup>              | 0.00                                 | 4.48·10 <sup>-1</sup>         | 3.32·10 <sup>-3</sup>       | 1.45·10 <sup>-3</sup>       | 3.15·10 <sup>-4</sup>    | 98.2%                  | 0.77%              | 0.34%              | 0.07%                | 0.00%                            | 0.05%                              |
| 9  | 40.7                 | 93.4             | 42.6                          | 49078      | 1.83·10 <sup>-4</sup>              | 0.00                                 | 4.51·10 <sup>-1</sup>         | 3.44·10 <sup>-3</sup>       | 1.69·10 <sup>-3</sup>       | 1.51·10 <sup>-4</sup>    | 98.8%                  | 0.80%              | 0.39%              | 0.04%                | 0.00%                            | 0.04%                              |
| 10 | 40.2                 | 98.7             | 42.1                          | 49104      | 2.24·10 <sup>-4</sup>              | 0.00                                 | 4.52·10 <sup>-1</sup>         | 3.32·10 <sup>-3</sup>       | 1.61·10 <sup>-3</sup>       | 7.54·10 <sup>-5</sup>    | 99.0%                  | 0.77%              | 0.37%              | 0.02%                | 0.00%                            | 0.05%                              |
| 11 | 39.7                 | 100.7            | 41.5                          | 51079      | 1.76·10 <sup>-4</sup>              | 0.00                                 | 4.50·10 <sup>-1</sup>         | 3.31·10 <sup>-3</sup>       | 1.51·10 <sup>-3</sup>       | 3.63·10 <sup>-4</sup>    | 98.6%                  | 0.77%              | 0.35%              | 0.08%                | 0.00%                            | 0.04%                              |
| 12 | 39.1                 | 102.7            | 41.0                          | 49857      | 2.41·10 <sup>-4</sup>              | 0.00                                 | 4.51·10 <sup>-1</sup>         | 3.59·10 <sup>-3</sup>       | 1.58·10 <sup>-3</sup>       | 5.20·10 <sup>-4</sup>    | 98.9%                  | 0.83%              | 0.37%              | 0.12%                | 0.00%                            | 0.05%                              |
| 13 | 38.6                 | 104.5            | 40.5                          | 49520      | 2.83·10 <sup>-4</sup>              | 0.00                                 | 4.52·10 <sup>-1</sup>         | 3.63·10 <sup>-3</sup>       | 1.55·10 <sup>-3</sup>       | 4.49·10 <sup>-4</sup>    | 99.0%                  | 0.84%              | 0.36%              | 0.10%                | 0.00%                            | 0.06%                              |
| 14 | 38.1                 | 105.5            | 39.9                          | 51819      | 1.54·10 <sup>-4</sup>              | 0.00                                 | 4.54·10 <sup>-1</sup>         | 3.45·10 <sup>-3</sup>       | 1.52·10 <sup>-3</sup>       | 1.43·10 <sup>-4</sup>    | 99.5%                  | 0.80%              | 0.35%              | 0.03%                | 0.00%                            | 0.03%                              |

|    |      |       |      |       |                       |      |                       |                       |                       |                       |       |       |       |       |       |       |
|----|------|-------|------|-------|-----------------------|------|-----------------------|-----------------------|-----------------------|-----------------------|-------|-------|-------|-------|-------|-------|
| 15 | 37.6 | 105.1 | 39.4 | 49709 | 1.41·10 <sup>-4</sup> | 0.00 | 4.49·10 <sup>-1</sup> | 3.40·10 <sup>-3</sup> | 1.55·10 <sup>-3</sup> | 2.24·10 <sup>-4</sup> | 98.5% | 0.79% | 0.36% | 0.05% | 0.00% | 0.03% |
| 16 | 37.0 | 104.7 | 38.8 | 52539 | 3.81·10 <sup>-4</sup> | 0.00 | 4.54·10 <sup>-1</sup> | 3.52·10 <sup>-3</sup> | 1.75·10 <sup>-3</sup> | 2.11·10 <sup>-4</sup> | 99.4% | 0.82% | 0.41% | 0.05% | 0.00% | 0.08% |
| 17 | 36.5 | 103.7 | 38.2 | 53398 | 2.81·10 <sup>-4</sup> | 0.00 | 4.53·10 <sup>-1</sup> | 3.52·10 <sup>-3</sup> | 1.48·10 <sup>-3</sup> | 2.77·10 <sup>-4</sup> | 99.3% | 0.82% | 0.34% | 0.06% | 0.00% | 0.06% |
| 18 | 36.0 | 104.8 | 37.7 | 52033 | 2.69·10 <sup>-4</sup> | 0.00 | 4.54·10 <sup>-1</sup> | 3.40·10 <sup>-3</sup> | 1.69·10 <sup>-3</sup> | 7.12·10 <sup>-5</sup> | 99.5% | 0.79% | 0.39% | 0.02% | 0.00% | 0.06% |
| 19 | 35.4 | 106.2 | 37.1 | 50800 | 2.95·10 <sup>-4</sup> | 0.00 | 4.52·10 <sup>-1</sup> | 3.44·10 <sup>-3</sup> | 1.44·10 <sup>-3</sup> | 3.65·10 <sup>-4</sup> | 99.0% | 0.80% | 0.33% | 0.08% | 0.00% | 0.06% |
| 20 | 34.9 | 107.5 | 36.6 | 53892 | 2.78·10 <sup>-4</sup> | 0.00 | 4.56·10 <sup>-1</sup> | 3.27·10 <sup>-3</sup> | 1.47·10 <sup>-3</sup> | 6.87·10 <sup>-5</sup> | 99.8% | 0.76% | 0.34% | 0.02% | 0.00% | 0.06% |
| 21 | 34.4 | 109.6 | 36.0 | 49351 | 4.26·10 <sup>-4</sup> | 0.00 | 4.51·10 <sup>-1</sup> | 3.55·10 <sup>-3</sup> | 1.60·10 <sup>-3</sup> | 7.50·10 <sup>-4</sup> | 98.7% | 0.82% | 0.37% | 0.17% | 0.00% | 0.09% |
| 22 | 33.8 | 111.1 | 35.4 | 55057 | 3.27·10 <sup>-4</sup> | 0.00 | 4.44·10 <sup>-1</sup> | 3.51·10 <sup>-3</sup> | 1.69·10 <sup>-3</sup> | 1.28·10 <sup>-3</sup> | 97.4% | 0.81% | 0.39% | 0.30% | 0.00% | 0.07% |
| 23 | 33.3 | 111.4 | 34.8 | 59990 | 3.33·10 <sup>-4</sup> | 0.00 | 4.50·10 <sup>-1</sup> | 3.50·10 <sup>-3</sup> | 1.52·10 <sup>-3</sup> | 9.88·10 <sup>-4</sup> | 98.6% | 0.81% | 0.35% | 0.23% | 0.00% | 0.07% |
| 24 | 32.8 | 111.8 | 34.2 | 57889 | 3.80·10 <sup>-4</sup> | 0.00 | 4.50·10 <sup>-1</sup> | 3.30·10 <sup>-3</sup> | 1.55·10 <sup>-3</sup> | 7.68·10 <sup>-4</sup> | 98.6% | 0.77% | 0.36% | 0.18% | 0.00% | 0.08% |
| 25 | 32.2 | 112.6 | 33.6 | 57054 | 3.15·10 <sup>-4</sup> | 0.00 | 4.53·10 <sup>-1</sup> | 3.51·10 <sup>-3</sup> | 1.65·10 <sup>-3</sup> | 1.49·10 <sup>-3</sup> | 99.3% | 0.81% | 0.38% | 0.35% | 0.00% | 0.07% |
| 26 | 31.7 | 113.0 | 33.1 | 52932 | 4.35·10 <sup>-4</sup> | 0.00 | 4.51·10 <sup>-1</sup> | 3.40·10 <sup>-3</sup> | 1.68·10 <sup>-3</sup> | 1.47·10 <sup>-3</sup> | 98.9% | 0.79% | 0.39% | 0.34% | 0.00% | 0.09% |
| 27 | 31.2 | 113.2 | 32.5 | 57162 | 3.15·10 <sup>-4</sup> | 0.00 | 4.56·10 <sup>-1</sup> | 3.43·10 <sup>-3</sup> | 1.61·10 <sup>-3</sup> | 1.62·10 <sup>-3</sup> | 100%  | 0.80% | 0.37% | 0.38% | 0.00% | 0.07% |
| 28 | 30.7 | 113.4 | 31.9 | 56929 | 4.04·10 <sup>-4</sup> | 0.00 | 4.52·10 <sup>-1</sup> | 3.58·10 <sup>-3</sup> | 1.60·10 <sup>-3</sup> | 1.95·10 <sup>-3</sup> | 99.0% | 0.83% | 0.37% | 0.45% | 0.00% | 0.08% |
| 29 | 30.1 | 113.5 | 31.3 | 52722 | 4.93·10 <sup>-4</sup> | 0.00 | 4.55·10 <sup>-1</sup> | 3.47·10 <sup>-3</sup> | 1.65·10 <sup>-3</sup> | 2.81·10 <sup>-3</sup> | 99.7% | 0.81% | 0.38% | 0.65% | 0.00% | 0.10% |
| 30 | 29.6 | 113.6 | 30.7 | 53077 | 5.46·10 <sup>-4</sup> | 0.00 | 4.46·10 <sup>-1</sup> | 3.39·10 <sup>-3</sup> | 1.53·10 <sup>-3</sup> | 2.16·10 <sup>-3</sup> | 97.7% | 0.79% | 0.35% | 0.50% | 0.00% | 0.11% |
| 31 | 29.1 | 113.8 | 30.0 | 59100 | 5.75·10 <sup>-4</sup> | 0.00 | 4.53·10 <sup>-1</sup> | 3.42·10 <sup>-3</sup> | 1.68·10 <sup>-3</sup> | 2.69·10 <sup>-3</sup> | 99.3% | 0.79% | 0.39% | 0.63% | 0.00% | 0.12% |
| 32 | 28.5 | 114.0 | 29.4 | 51767 | 5.99·10 <sup>-4</sup> | 0.00 | 4.54·10 <sup>-1</sup> | 3.42·10 <sup>-3</sup> | 1.64·10 <sup>-3</sup> | 3.79·10 <sup>-3</sup> | 99.5% | 0.79% | 0.38% | 0.88% | 0.00% | 0.12% |
| 33 | 28.0 | 114.1 | 28.8 | 51488 | 5.24·10 <sup>-4</sup> | 0.00 | 4.50·10 <sup>-1</sup> | 3.65·10 <sup>-3</sup> | 1.67·10 <sup>-3</sup> | 3.38·10 <sup>-3</sup> | 98.5% | 0.85% | 0.39% | 0.78% | 0.00% | 0.11% |
| 34 | 27.5 | 114.2 | 28.2 | 54492 | 7.71·10 <sup>-4</sup> | 0.00 | 4.49·10 <sup>-1</sup> | 3.58·10 <sup>-3</sup> | 1.61·10 <sup>-3</sup> | 3.67·10 <sup>-3</sup> | 98.5% | 0.83% | 0.37% | 0.85% | 0.00% | 0.16% |
| 35 | 26.9 | 114.3 | 27.6 | 54503 | 7.71·10 <sup>-4</sup> | 0.00 | 4.47·10 <sup>-1</sup> | 3.56·10 <sup>-3</sup> | 1.67·10 <sup>-3</sup> | 4.62·10 <sup>-3</sup> | 97.9% | 0.83% | 0.39% | 1.07% | 0.00% | 0.16% |
| 36 | 26.4 | 114.1 | 27.0 | 52996 | 3.40·10 <sup>-4</sup> | 0.00 | 4.49·10 <sup>-1</sup> | 3.70·10 <sup>-3</sup> | 1.72·10 <sup>-3</sup> | 5.10·10 <sup>-3</sup> | 98.5% | 0.86% | 0.40% | 1.18% | 0.00% | 0.07% |
| 37 | 25.9 | 114.7 | 26.4 | 53263 | 1.07·10 <sup>-3</sup> | 0.00 | 4.50·10 <sup>-1</sup> | 3.68·10 <sup>-3</sup> | 1.50·10 <sup>-3</sup> | 5.08·10 <sup>-3</sup> | 98.5% | 0.85% | 0.35% | 1.18% | 0.00% | 0.22% |
| 38 | 25.4 | 114.7 | 25.8 | 57265 | 1.33·10 <sup>-3</sup> | 0.00 | 4.50·10 <sup>-1</sup> | 3.54·10 <sup>-3</sup> | 1.61·10 <sup>-3</sup> | 5.82·10 <sup>-3</sup> | 98.5% | 0.82% | 0.37% | 1.35% | 0.00% | 0.27% |
| 39 | 24.8 | 114.8 | 25.2 | 55861 | 1.58·10 <sup>-3</sup> | 0.00 | 4.53·10 <sup>-1</sup> | 3.63·10 <sup>-3</sup> | 1.63·10 <sup>-3</sup> | 6.83·10 <sup>-3</sup> | 99.3% | 0.84% | 0.38% | 1.59% | 0.00% | 0.32% |
| 40 | 24.3 | 114.6 | 24.6 | 61756 | 1.75·10 <sup>-3</sup> | 0.00 | 4.52·10 <sup>-1</sup> | 3.53·10 <sup>-3</sup> | 1.64·10 <sup>-3</sup> | 7.26·10 <sup>-3</sup> | 99.0% | 0.82% | 0.38% | 1.68% | 0.00% | 0.36% |
| 41 | 23.8 | 114.6 | 24.0 | 62196 | 2.04·10 <sup>-3</sup> | 0.00 | 4.52·10 <sup>-1</sup> | 3.52·10 <sup>-3</sup> | 1.74·10 <sup>-3</sup> | 8.04·10 <sup>-3</sup> | 99.1% | 0.82% | 0.40% | 1.87% | 0.00% | 0.42% |
| 42 | 23.2 | 114.8 | 23.4 | 65062 | 2.31·10 <sup>-3</sup> | 0.00 | 4.49·10 <sup>-1</sup> | 3.43·10 <sup>-3</sup> | 1.64·10 <sup>-3</sup> | 9.22·10 <sup>-3</sup> | 98.3% | 0.80% | 0.38% | 2.14% | 0.00% | 0.47% |
| 43 | 22.7 | 114.9 | 22.8 | 68364 | 2.72·10 <sup>-3</sup> | 0.00 | 4.49·10 <sup>-1</sup> | 3.60·10 <sup>-3</sup> | 1.70·10 <sup>-3</sup> | 9.97·10 <sup>-3</sup> | 98.4% | 0.84% | 0.39% | 2.31% | 0.00% | 0.55% |
| 44 | 22.2 | 114.8 | 22.2 | 62834 | 3.14·10 <sup>-3</sup> | 0.00 | 4.49·10 <sup>-1</sup> | 3.60·10 <sup>-3</sup> | 1.54·10 <sup>-3</sup> | 1.18·10 <sup>-2</sup> | 98.4% | 0.84% | 0.36% | 2.74% | 0.00% | 0.64% |

|    |      |       |      |       |                      |      |                      |                      |                      |                      |       |       |       |       |       |       |
|----|------|-------|------|-------|----------------------|------|----------------------|----------------------|----------------------|----------------------|-------|-------|-------|-------|-------|-------|
| 45 | 21.6 | 114.8 | 21.6 | 59440 | $3.57 \cdot 10^{-3}$ | 0.00 | $4.47 \cdot 10^{-1}$ | $3.68 \cdot 10^{-3}$ | $1.70 \cdot 10^{-3}$ | $1.37 \cdot 10^{-2}$ | 98.0% | 0.86% | 0.39% | 3.18% | 0.00% | 0.73% |
| 46 | 21.1 | 114.9 | 21.0 | 63840 | $4.14 \cdot 10^{-3}$ | 0.00 | $4.44 \cdot 10^{-1}$ | $3.68 \cdot 10^{-3}$ | $1.71 \cdot 10^{-3}$ | $1.28 \cdot 10^{-2}$ | 97.2% | 0.85% | 0.40% | 2.96% | 0.00% | 0.84% |
| 47 | 20.6 | 115.0 | 20.4 | 61408 | $4.79 \cdot 10^{-3}$ | 0.00 | $4.44 \cdot 10^{-1}$ | $3.76 \cdot 10^{-3}$ | $1.6 \cdot 10^{-3}$  | $1.56 \cdot 10^{-2}$ | 97.3% | 0.87% | 0.39% | 3.61% | 0.00% | 0.97% |
| 48 | 20.0 | 114.4 | 19.8 | 70740 | $5.63 \cdot 10^{-3}$ | 0.00 | $4.49 \cdot 10^{-1}$ | $3.77 \cdot 10^{-3}$ | $1.68 \cdot 10^{-3}$ | $1.40 \cdot 10^{-2}$ | 98.5% | 0.88% | 0.39% | 3.26% | 0.00% | 1.14% |
| 49 | 19.5 | 115.0 | 19.1 | 61459 | $6.49 \cdot 10^{-3}$ | 0.00 | $4.38 \cdot 10^{-1}$ | $3.63 \cdot 10^{-3}$ | $1.74 \cdot 10^{-3}$ | $2.02 \cdot 10^{-2}$ | 95.9% | 0.84% | 0.40% | 4.70% | 0.00% | 1.32% |
| 50 | 19.0 | 115.0 | 18.5 | 57916 | $7.32 \cdot 10^{-3}$ | 0.00 | $4.37 \cdot 10^{-1}$ | $3.70 \cdot 10^{-3}$ | $1.69 \cdot 10^{-3}$ | $2.03 \cdot 10^{-2}$ | 95.8% | 0.86% | 0.39% | 4.72% | 0.00% | 1.48% |
| 51 | 18.5 | 114.9 | 17.9 | 65937 | $8.93 \cdot 10^{-3}$ | 0.00 | $4.44 \cdot 10^{-1}$ | $3.72 \cdot 10^{-3}$ | $1.70 \cdot 10^{-3}$ | $1.79 \cdot 10^{-2}$ | 97.4% | 0.86% | 0.39% | 4.16% | 0.00% | 1.81% |
| 52 | 17.9 | 114.8 | 17.3 | 60322 | $1.03 \cdot 10^{-2}$ | 0.00 | $4.34 \cdot 10^{-1}$ | $3.75 \cdot 10^{-3}$ | $1.61 \cdot 10^{-3}$ | $2.53 \cdot 10^{-2}$ | 95.1% | 0.87% | 0.37% | 5.87% | 0.00% | 2.09% |
| 53 | 17.4 | 114.8 | 16.7 | 57789 | $1.20 \cdot 10^{-2}$ | 0.00 | $4.28 \cdot 10^{-1}$ | $3.82 \cdot 10^{-3}$ | $1.71 \cdot 10^{-3}$ | $2.55 \cdot 10^{-2}$ | 93.8% | 0.89% | 0.40% | 5.92% | 0.00% | 2.44% |
| 54 | 16.9 | 114.7 | 16.1 | 62647 | $1.44 \cdot 10^{-2}$ | 0.00 | $4.29 \cdot 10^{-1}$ | $3.54 \cdot 10^{-3}$ | $1.55 \cdot 10^{-3}$ | $2.39 \cdot 10^{-2}$ | 94.0% | 0.82% | 0.36% | 5.56% | 0.00% | 2.93% |
| 55 | 16.3 | 114.6 | 15.5 | 68150 | $1.78 \cdot 10^{-2}$ | 0.00 | $4.33 \cdot 10^{-1}$ | $3.82 \cdot 10^{-3}$ | $1.67 \cdot 10^{-3}$ | $2.50 \cdot 10^{-2}$ | 94.9% | 0.89% | 0.39% | 5.80% | 0.00% | 3.61% |
| 56 | 15.8 | 114.7 | 14.9 | 59007 | $2.06 \cdot 10^{-2}$ | 0.00 | $4.21 \cdot 10^{-1}$ | $3.53 \cdot 10^{-3}$ | $1.71 \cdot 10^{-3}$ | $3.31 \cdot 10^{-2}$ | 92.3% | 0.82% | 0.40% | 7.69% | 0.00% | 4.17% |
| 57 | 15.3 | 114.7 | 14.3 | 71837 | $2.42 \cdot 10^{-2}$ | 0.00 | $4.24 \cdot 10^{-1}$ | $3.79 \cdot 10^{-3}$ | $1.66 \cdot 10^{-3}$ | $2.45 \cdot 10^{-2}$ | 93.0% | 0.88% | 0.38% | 5.70% | 0.00% | 4.91% |
| 58 | 14.7 | 114.5 | 13.7 | 55471 | $2.89 \cdot 10^{-2}$ | 0.00 | $4.13 \cdot 10^{-1}$ | $3.77 \cdot 10^{-3}$ | $1.57 \cdot 10^{-3}$ | $4.01 \cdot 10^{-2}$ | 90.6% | 0.87% | 0.36% | 9.30% | 0.00% | 5.84% |
| 59 | 14.2 | 114.3 | 13.1 | 57730 | $3.19 \cdot 10^{-2}$ | 0.00 | $4.10 \cdot 10^{-1}$ | $3.71 \cdot 10^{-3}$ | $1.73 \cdot 10^{-3}$ | $3.10 \cdot 10^{-2}$ | 89.8% | 0.86% | 0.40% | 7.19% | 0.00% | 6.45% |
| 60 | 13.7 | 114.1 | 12.5 | 87754 | $3.74 \cdot 10^{-2}$ | 0.00 | $4.15 \cdot 10^{-1}$ | $3.73 \cdot 10^{-3}$ | $1.83 \cdot 10^{-3}$ | $2.22 \cdot 10^{-2}$ | 91.0% | 0.87% | 0.43% | 5.16% | 0.00% | 7.57% |
| 61 | 13.2 | 113.8 | 11.9 | 61657 | $4.00 \cdot 10^{-2}$ | 0.00 | $3.99 \cdot 10^{-1}$ | $3.67 \cdot 10^{-3}$ | $1.67 \cdot 10^{-3}$ | $4.95 \cdot 10^{-2}$ | 87.5% | 0.85% | 0.39% | 11.5% | 0.00% | 8.09% |
| 62 | 12.6 | 113.4 | 11.3 | 68217 | $5.27 \cdot 10^{-2}$ | 0.00 | $3.91 \cdot 10^{-1}$ | $3.87 \cdot 10^{-3}$ | $1.64 \cdot 10^{-3}$ | $3.14 \cdot 10^{-2}$ | 85.7% | 0.90% | 0.38% | 7.29% | 0.00% | 10.7% |
| 63 | 12.1 | 112.7 | 10.7 | 25380 | $5.85 \cdot 10^{-2}$ | 0.00 | $3.82 \cdot 10^{-1}$ | $3.78 \cdot 10^{-3}$ | $2.01 \cdot 10^{-3}$ | $9.49 \cdot 10^{-2}$ | 83.8% | 0.88% | 0.47% | 22.0% | 0.00% | 11.8% |
| 64 | 11.6 | 111.6 | 10.1 | 95461 | $5.85 \cdot 10^{-2}$ | 0.00 | $3.81 \cdot 10^{-1}$ | $3.75 \cdot 10^{-3}$ | $1.66 \cdot 10^{-3}$ | $9.47 \cdot 10^{-3}$ | 83.6% | 0.87% | 0.38% | 2.20% | 0.00% | 11.9% |
| 65 | 11.0 | 110.7 | 9.5  | 57755 | $6.51 \cdot 10^{-2}$ | 0.00 | $3.62 \cdot 10^{-1}$ | $3.64 \cdot 10^{-3}$ | $1.66 \cdot 10^{-3}$ | $5.76 \cdot 10^{-2}$ | 79.4% | 0.84% | 0.39% | 13.4% | 0.00% | 13.2% |
| 66 | 10.5 | 109.8 | 9.0  | 61381 | $7.90 \cdot 10^{-2}$ | 0.00 | $3.53 \cdot 10^{-1}$ | $3.60 \cdot 10^{-3}$ | $1.76 \cdot 10^{-3}$ | $3.28 \cdot 10^{-2}$ | 77.4% | 0.84% | 0.41% | 7.62% | 0.00% | 16.0% |
| 67 | 10.0 | 108.9 | 8.4  | 56826 | $8.02 \cdot 10^{-2}$ | 0.00 | $3.38 \cdot 10^{-1}$ | $3.45 \cdot 10^{-3}$ | $1.67 \cdot 10^{-3}$ | $3.69 \cdot 10^{-2}$ | 74.1% | 0.80% | 0.39% | 8.56% | 0.00% | 16.2% |
| 68 | 9.4  | 109.4 | 7.8  | 62722 | $8.67 \cdot 10^{-2}$ | 0.00 | $3.27 \cdot 10^{-1}$ | $3.59 \cdot 10^{-3}$ | $1.64 \cdot 10^{-3}$ | $2.98 \cdot 10^{-2}$ | 71.6% | 0.83% | 0.38% | 6.91% | 0.00% | 17.5% |
| 69 | 8.9  | 110.4 | 7.2  | 72433 | $1.43 \cdot 10^{-1}$ | 0.00 | $3.07 \cdot 10^{-1}$ | $3.48 \cdot 10^{-3}$ | $1.70 \cdot 10^{-3}$ | $2.74 \cdot 10^{-2}$ | 67.3% | 0.81% | 0.39% | 6.36% | 0.00% | 29.0% |
| 70 | 8.4  | 110.1 | 6.7  | 80708 | $1.68 \cdot 10^{-1}$ | 0.00 | $2.92 \cdot 10^{-1}$ | $3.64 \cdot 10^{-3}$ | $1.67 \cdot 10^{-3}$ | $2.55 \cdot 10^{-2}$ | 64.0% | 0.85% | 0.39% | 5.92% | 0.00% | 34.1% |
| 71 | 7.9  | 111.3 | 6.1  | 81057 | $1.96 \cdot 10^{-1}$ | 0.00 | $2.70 \cdot 10^{-1}$ | $3.53 \cdot 10^{-3}$ | $1.57 \cdot 10^{-3}$ | $2.70 \cdot 10^{-2}$ | 59.2% | 0.82% | 0.36% | 6.27% | 0.00% | 39.6% |
| 72 | 7.3  | 111.4 | 5.5  | 82470 | $2.19 \cdot 10^{-1}$ | 0.00 | $2.44 \cdot 10^{-1}$ | $3.48 \cdot 10^{-3}$ | $1.46 \cdot 10^{-3}$ | $2.40 \cdot 10^{-2}$ | 53.6% | 0.81% | 0.34% | 5.57% | 0.00% | 44.3% |
| 73 | 6.8  | 111.1 | 4.9  | 87451 | $2.52 \cdot 10^{-1}$ | 0.00 | $2.17 \cdot 10^{-1}$ | $3.14 \cdot 10^{-3}$ | $1.50 \cdot 10^{-3}$ | $2.10 \cdot 10^{-2}$ | 47.6% | 0.73% | 0.35% | 4.89% | 0.00% | 51.0% |
| 74 | 6.3  | 110.7 | 4.4  | 55707 | $2.75 \cdot 10^{-1}$ | 0.00 | $1.83 \cdot 10^{-1}$ | $2.96 \cdot 10^{-3}$ | $1.42 \cdot 10^{-3}$ | $2.94 \cdot 10^{-2}$ | 40.3% | 0.69% | 0.33% | 6.82% | 0.00% | 55.7% |

|    |     |       |     |        |                      |      |                      |                      |                      |                      |       |       |       |       |       |        |
|----|-----|-------|-----|--------|----------------------|------|----------------------|----------------------|----------------------|----------------------|-------|-------|-------|-------|-------|--------|
| 75 | 5.7 | 109.0 | 3.8 | 75364  | $3.17 \cdot 10^{-1}$ | 0.00 | $1.59 \cdot 10^{-1}$ | $2.72 \cdot 10^{-3}$ | $1.35 \cdot 10^{-3}$ | $1.21 \cdot 10^{-2}$ | 35.1% | 0.63% | 0.31% | 2.82% | 0.00% | 64.2%  |
| 76 | 5.2 | 105.9 | 3.2 | 68641  | $3.41 \cdot 10^{-1}$ | 0.00 | $1.28 \cdot 10^{-1}$ | $2.36 \cdot 10^{-3}$ | $1.34 \cdot 10^{-3}$ | $1.46 \cdot 10^{-2}$ | 28.1% | 0.55% | 0.31% | 3.38% | 0.00% | 69.0%  |
| 77 | 4.7 | 103.0 | 2.7 | 100513 | $3.79 \cdot 10^{-1}$ | 0.00 | $1.06 \cdot 10^{-1}$ | $2.11 \cdot 10^{-3}$ | $1.06 \cdot 10^{-3}$ | $7.74 \cdot 10^{-3}$ | 23.3% | 0.49% | 0.25% | 1.80% | 0.00% | 76.7%  |
| 78 | 4.1 | 100.1 | 2.2 | 57436  | $3.92 \cdot 10^{-1}$ | 0.00 | $8.04 \cdot 10^{-2}$ | $1.93 \cdot 10^{-3}$ | $8.18 \cdot 10^{-3}$ | $1.39 \cdot 10^{-2}$ | 17.8% | 0.45% | 0.19% | 3.22% | 0.00% | 79.4%  |
| 79 | 3.6 | 91.5  | 1.7 | 74038  | $4.18 \cdot 10^{-1}$ | 0.00 | $6.28 \cdot 10^{-2}$ | $1.66 \cdot 10^{-3}$ | $1.04 \cdot 10^{-4}$ | $4.65 \cdot 10^{-3}$ | 13.9% | 0.39% | 0.24% | 1.08% | 0.00% | 84.7%  |
| 80 | 3.1 | 78.3  | 1.3 | 72249  | $4.37 \cdot 10^{-1}$ | 0.00 | $4.87 \cdot 10^{-2}$ | $1.38 \cdot 10^{-3}$ | $7.47 \cdot 10^{-4}$ | $4.97 \cdot 10^{-2}$ | 10.8% | 0.32% | 0.17% | 1.15% | 0.00% | 88.5%  |
| 81 | 2.5 | 69.4  | 0.9 | 63430  | $4.51 \cdot 10^{-1}$ | 0.00 | $3.74 \cdot 10^{-2}$ | $1.25 \cdot 10^{-3}$ | $6.78 \cdot 10^{-4}$ | $4.32 \cdot 10^{-2}$ | 8.36% | 0.29% | 0.16% | 1.00% | 0.00% | 91.2%  |
| 82 | 2.0 | 60.5  | 0.6 | 38607  | $4.48 \cdot 10^{-1}$ | 0.00 | $2.73 \cdot 10^{-2}$ | $1.24 \cdot 10^{-3}$ | $4.92 \cdot 10^{-4}$ | $4.22 \cdot 10^{-2}$ | 6.16% | 0.29% | 0.11% | 0.98% | 0.00% | 90.7%  |
| 83 | 1.5 | 48.0  | 0.3 | 32956  | $4.62 \cdot 10^{-1}$ | 0.00 | $2.17 \cdot 10^{-2}$ | $1.03 \cdot 10^{-3}$ | $3.94 \cdot 10^{-4}$ | $3.15 \cdot 10^{-2}$ | 4.92% | 0.24% | 0.09% | 0.73% | 0.00% | 93.6%  |
| 84 | 1.0 | 16.7  | 0.1 | 36695  | $4.93 \cdot 10^{-1}$ | 0.00 | $1.80 \cdot 10^{-2}$ | $9.81 \cdot 10^{-4}$ | $4.63 \cdot 10^{-4}$ | $2.22 \cdot 10^{-2}$ | 4.11% | 0.23% | 0.11% | 0.52% | 0.00% | 99.8%  |
| 85 | 0.4 | 10.4  | 0.0 | 16720  | $4.94 \cdot 10^{-1}$ | 0.00 | $1.34 \cdot 10^{-2}$ | $1.38 \cdot 10^{-3}$ | $4.78 \cdot 10^{-4}$ | $5.76 \cdot 10^{-2}$ | 3.11% | 0.32% | 0.11% | 1.34% | 0.00% | 100.0% |

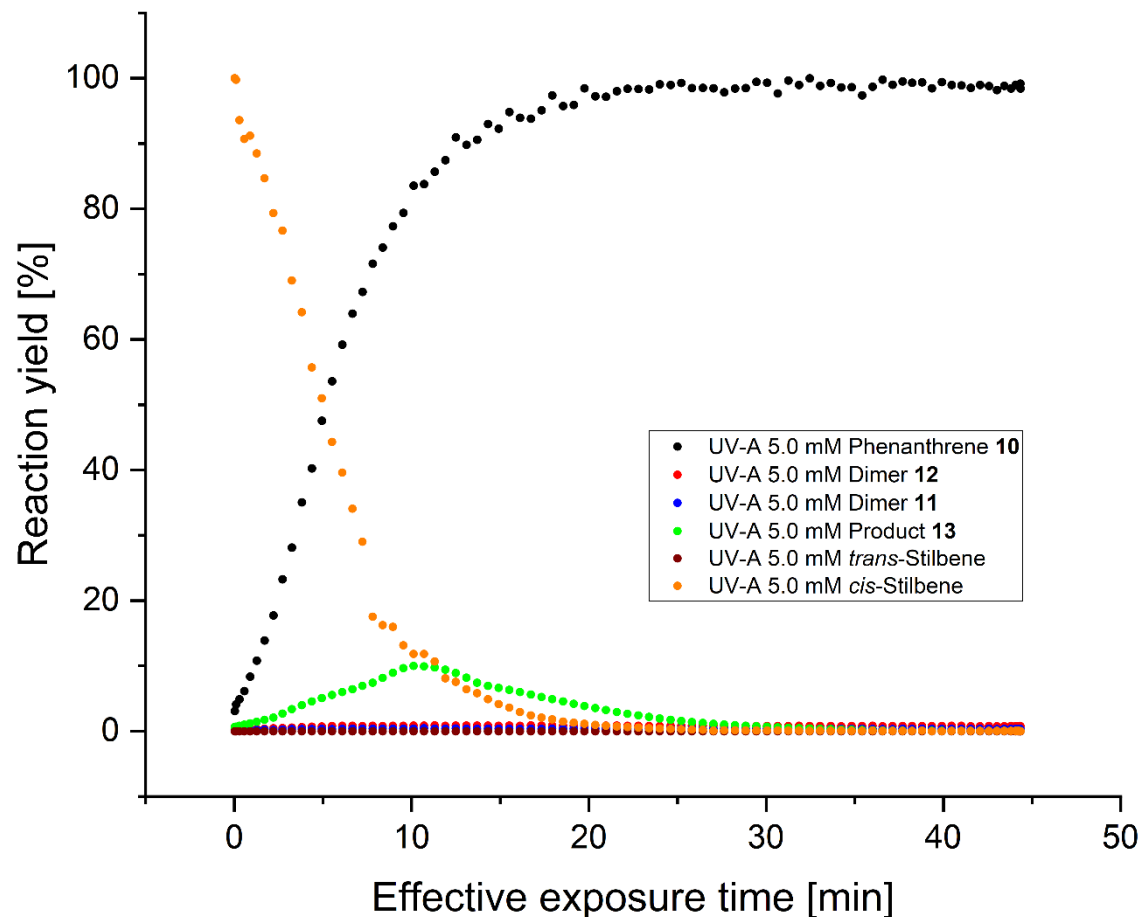

Figure S 16. Results of Switch-Off optimisation of Mallory photoreaction using UV-A light and 5.0 mM stilbene concentration. Top: Reaction components GC areas, conversion, and yield plotted against uncorrected residence time. Bottom: Reaction components GC areas, conversion, and yield plotted against exposure time, corrected for light inhomogeneity.

#### 2. 4. 2. 2. Switch-Off experiment results using UV-A light and 50.0 mM stilbene concentration

*Cis*-stilbene (445.0  $\mu\text{L}$ , 450.2 mg, 2.50 mmol, 1.0 eq., 50.0 mM solution), iodine (63.0 mg, 0.25 mmol, 0.1 eq., 5.0 mM solution), and dibutyl ether (1.5 mL, 1.17 g, 9.0 mmol, 3.6 eq., 180.0 mM solution) were dissolved in cyclohexane (48.0 mL, 106.6 vol.), obtained solution was saturated with oxygen by bubbling gaseous  $\text{O}_2$  for 15 minutes, and then connected to flow reagents stream. Cyclohexane was connected to flow solvents stream. The UV-A lamp (Philips PLL 36W) and water cooling were then turned on and system was allowed to equilibrate for 30 minutes. Then reaction mixture was injected into the photoreactor (internal volume of 31.8 mL, 1.00 mm I.D., 1.60 mm O.D., PFA). Effective exposure time was set to 180 minutes (which corresponds to 0.177 mL/min flow rate). Once the photoreactor was filled with reaction mixture, the UV lamp was

switched off, the pump was switched to solvent stream, the reaction mixture was eluted from the photoreactor, and was collected into vials (0.375 mL of reaction mixture, diluted to 1.0 mL with acetone). Collected samples were then analysed using off-line GC.

Table S 12. Results of Switch-Off optimisation performed for Mallory reaction of *cis*-stilbene using UV-A light and 50.0 mM stilbene concentration.

| #  | Residence time [min] | Light output [%] | Effective exposure time [min] | IS GC Area | Area Ratio <i>cis</i> -Stilbene/IS | Area Ratio <i>trans</i> -Stilbene/IS | Area Ratio Phenanthrene 10/IS | Area Ratio Dimer ABAB 12/IS | Area Ratio Dimer AABB 11/IS | Area Ratio Product 13/IS | Phenanthrene yield [%] | Dimer 12 yield [%] | Dimer 11 yield [%] | Product 13 yield [%] | <i>trans</i> -Stilbene yield [%] | Remaining <i>cis</i> -Stilbene [%] |
|----|----------------------|------------------|-------------------------------|------------|------------------------------------|--------------------------------------|-------------------------------|-----------------------------|-----------------------------|--------------------------|------------------------|--------------------|--------------------|----------------------|----------------------------------|------------------------------------|
| 1  | 179.7                | 0.0              | 177.4                         | 109081     | 1.92·10 <sup>-3</sup>              | 1.92·10 <sup>-2</sup>                | 2.54·10 <sup>-1</sup>         | 8.62·10 <sup>-2</sup>       | 4.70·10 <sup>-2</sup>       | 2.36·10 <sup>-2</sup>    | 59.0%                  | 10.0%              | 5.45%              | 3.21%                | 4.47%                            | 0.44%                              |
| 2  | 177.5                | 3.4              | 177.3                         | 154826     | 2.38·10 <sup>-3</sup>              | 1.94·10 <sup>-2</sup>                | 2.56·10 <sup>-1</sup>         | 8.78·10 <sup>-2</sup>       | 4.81·10 <sup>-2</sup>       | 1.66·10 <sup>-2</sup>    | 59.3%                  | 10.2%              | 5.58%              | 2.26%                | 4.50%                            | 0.54%                              |
| 3  | 175.4                | 15.0             | 177.2                         | 209235     | 2.57·10 <sup>-3</sup>              | 1.93·10 <sup>-2</sup>                | 2.55·10 <sup>-1</sup>         | 8.98·10 <sup>-2</sup>       | 4.93·10 <sup>-2</sup>       | 1.97·10 <sup>-2</sup>    | 59.2%                  | 10.4%              | 5.72%              | 2.68%                | 4.48%                            | 0.57%                              |
| 4  | 173.3                | 26.6             | 176.9                         | 195908     | 2.74·10 <sup>-3</sup>              | 1.92·10 <sup>-2</sup>                | 2.54·10 <sup>-1</sup>         | 8.86·10 <sup>-2</sup>       | 4.83·10 <sup>-2</sup>       | 2.96·10 <sup>-2</sup>    | 58.9%                  | 10.3%              | 5.61%              | 4.04%                | 4.46%                            | 0.61%                              |
| 5  | 171.2                | 49.7             | 176.3                         | 210482     | 2.79·10 <sup>-3</sup>              | 1.93·10 <sup>-2</sup>                | 2.55·10 <sup>-1</sup>         | 9.01·10 <sup>-2</sup>       | 4.93·10 <sup>-2</sup>       | 2.58·10 <sup>-2</sup>    | 59.3%                  | 10.5%              | 5.72%              | 3.52%                | 4.49%                            | 0.62%                              |
| 6  | 169.1                | 70.8             | 175.2                         | 200347     | 2.73·10 <sup>-3</sup>              | 1.94·10 <sup>-2</sup>                | 2.57·10 <sup>-1</sup>         | 9.02·10 <sup>-2</sup>       | 4.95·10 <sup>-2</sup>       | 3.01·10 <sup>-2</sup>    | 59.6%                  | 10.5%              | 5.75%              | 4.10%                | 4.51%                            | 0.60%                              |
| 7  | 166.9                | 77.9             | 173.7                         | 212641     | 2.86·10 <sup>-3</sup>              | 1.95·10 <sup>-2</sup>                | 2.56·10 <sup>-1</sup>         | 8.94·10 <sup>-2</sup>       | 4.91·10 <sup>-2</sup>       | 2.75·10 <sup>-2</sup>    | 59.4%                  | 10.4%              | 5.69%              | 3.74%                | 4.52%                            | 0.63%                              |
| 8  | 164.8                | 85.0             | 172.1                         | 214566     | 2.84·10 <sup>-3</sup>              | 1.95·10 <sup>-2</sup>                | 2.55·10 <sup>-1</sup>         | 9.09·10 <sup>-2</sup>       | 4.98·10 <sup>-2</sup>       | 2.92·10 <sup>-2</sup>    | 59.1%                  | 10.5%              | 5.77%              | 3.98%                | 4.53%                            | 0.63%                              |
| 9  | 162.7                | 93.4             | 170.2                         | 209322     | 2.92·10 <sup>-3</sup>              | 1.96·10 <sup>-2</sup>                | 2.55·10 <sup>-1</sup>         | 9.10·10 <sup>-2</sup>       | 4.99·10 <sup>-2</sup>       | 3.21·10 <sup>-2</sup>    | 59.3%                  | 10.6%              | 5.79%              | 4.38%                | 4.56%                            | 0.64%                              |
| 10 | 160.6                | 98.7             | 168.3                         | 213270     | 2.98·10 <sup>-3</sup>              | 1.95·10 <sup>-2</sup>                | 2.52·10 <sup>-1</sup>         | 9.07·10 <sup>-2</sup>       | 4.97·10 <sup>-2</sup>       | 3.21·10 <sup>-2</sup>    | 58.6%                  | 10.5%              | 5.77%              | 4.38%                | 4.53%                            | 0.65%                              |
| 11 | 158.5                | 100.7            | 166.2                         | 206376     | 3.10·10 <sup>-3</sup>              | 1.98·10 <sup>-2</sup>                | 2.54·10 <sup>-1</sup>         | 9.17·10 <sup>-2</sup>       | 5.00·10 <sup>-2</sup>       | 3.54·10 <sup>-2</sup>    | 59.0%                  | 10.6%              | 5.80%              | 4.82%                | 4.60%                            | 0.68%                              |
| 12 | 156.4                | 102.7            | 164.0                         | 206074     | 3.26·10 <sup>-3</sup>              | 1.99·10 <sup>-2</sup>                | 2.53·10 <sup>-1</sup>         | 9.09·10 <sup>-2</sup>       | 4.97·10 <sup>-2</sup>       | 3.62·10 <sup>-2</sup>    | 58.7%                  | 10.6%              | 5.77%              | 4.93%                | 4.63%                            | 0.71%                              |
| 13 | 154.2                | 104.5            | 161.8                         | 232378     | 3.45·10 <sup>-3</sup>              | 1.99·10 <sup>-2</sup>                | 2.50·10 <sup>-1</sup>         | 9.17·10 <sup>-2</sup>       | 5.00·10 <sup>-2</sup>       | 3.38·10 <sup>-2</sup>    | 57.9%                  | 10.6%              | 5.80%              | 4.60%                | 4.61%                            | 0.75%                              |
| 14 | 152.1                | 105.5            | 159.6                         | 264955     | 3.69·10 <sup>-3</sup>              | 2.01·10 <sup>-2</sup>                | 2.49·10 <sup>-1</sup>         | 9.40·10 <sup>-2</sup>       | 5.15·10 <sup>-2</sup>       | 3.57·10 <sup>-2</sup>    | 57.9%                  | 10.9%              | 5.97%              | 4.86%                | 4.67%                            | 0.79%                              |
| 15 | 150.0                | 105.1            | 157.4                         | 220090     | 3.91·10 <sup>-3</sup>              | 2.03·10 <sup>-2</sup>                | 2.49·10 <sup>-1</sup>         | 9.31·10 <sup>-2</sup>       | 5.09·10 <sup>-2</sup>       | 5.39·10 <sup>-2</sup>    | 57.7%                  | 10.8%              | 5.90%              | 7.34%                | 4.71%                            | 0.84%                              |
| 16 | 147.9                | 104.7            | 155.2                         | 213868     | 4.21·10 <sup>-3</sup>              | 2.05·10 <sup>-2</sup>                | 2.48·10 <sup>-1</sup>         | 9.31·10 <sup>-2</sup>       | 5.07·10 <sup>-2</sup>       | 4.87·10 <sup>-2</sup>    | 57.5%                  | 10.8%              | 5.89%              | 6.63%                | 4.75%                            | 0.89%                              |
| 17 | 145.8                | 103.7            | 152.9                         | 227018     | 4.51·10 <sup>-3</sup>              | 2.05·10 <sup>-2</sup>                | 2.44·10 <sup>-1</sup>         | 9.24·10 <sup>-2</sup>       | 5.05·10 <sup>-2</sup>       | 4.68·10 <sup>-2</sup>    | 56.6%                  | 10.7%              | 5.86%              | 6.38%                | 4.75%                            | 0.95%                              |
| 18 | 143.6                | 104.8            | 150.7                         | 208912     | 4.80·10 <sup>-3</sup>              | 2.05·10 <sup>-2</sup>                | 2.42·10 <sup>-1</sup>         | 9.15·10 <sup>-2</sup>       | 4.99·10 <sup>-2</sup>       | 5.73·10 <sup>-2</sup>    | 56.1%                  | 10.6%              | 5.80%              | 7.80%                | 4.76%                            | 1.01%                              |
| 19 | 141.5                | 106.2            | 148.5                         | 219769     | 5.05·10 <sup>-3</sup>              | 2.05·10 <sup>-2</sup>                | 2.39·10 <sup>-1</sup>         | 9.18·10 <sup>-2</sup>       | 5.01·10 <sup>-2</sup>       | 5.23·10 <sup>-2</sup>    | 55.6%                  | 10.7%              | 5.81%              | 7.13%                | 4.77%                            | 1.06%                              |
| 20 | 139.4                | 107.5            | 146.3                         | 226213     | 5.37·10 <sup>-3</sup>              | 2.08·10 <sup>-2</sup>                | 2.39·10 <sup>-1</sup>         | 9.29·10 <sup>-2</sup>       | 5.08·10 <sup>-2</sup>       | 5.67·10 <sup>-2</sup>    | 55.6%                  | 10.8%              | 5.90%              | 7.72%                | 4.82%                            | 1.12%                              |
| 21 | 137.3                | 109.6            | 144.0                         | 234498     | 5.74·10 <sup>-3</sup>              | 2.09·10 <sup>-2</sup>                | 2.38·10 <sup>-1</sup>         | 9.20·10 <sup>-2</sup>       | 5.03·10 <sup>-2</sup>       | 5.99·10 <sup>-2</sup>    | 55.2%                  | 10.7%              | 5.84%              | 8.15%                | 4.85%                            | 1.20%                              |
| 22 | 135.2                | 111.1            | 141.7                         | 62733      | 4.53·10 <sup>-3</sup>              | 2.07·10 <sup>-2</sup>                | 2.35·10 <sup>-1</sup>         | 8.90·10 <sup>-2</sup>       | 4.85·10 <sup>-2</sup>       | 2.41·10 <sup>-1</sup>    | 54.7%                  | 10.3%              | 5.63%              | -                    | 4.81%                            | 0.96%                              |



|    |       |       |       |        |                       |                       |                       |                       |                       |                       |       |       |       |       |       |       |
|----|-------|-------|-------|--------|-----------------------|-----------------------|-----------------------|-----------------------|-----------------------|-----------------------|-------|-------|-------|-------|-------|-------|
| 23 | 133.1 | 111.4 | 139.3 | 220717 | 6.01·10 <sup>-3</sup> | 2.11·10 <sup>-2</sup> | 2.34·10 <sup>-1</sup> | 9.26·10 <sup>-2</sup> | 5.05·10 <sup>-2</sup> | 1.83·10 <sup>-2</sup> | 54.3% | 10.7% | 5.87% | -     | 4.89% | 1.25% |
| 24 | 130.9 | 111.8 | 136.9 | 225538 | 6.50·10 <sup>-3</sup> | 2.12·10 <sup>-2</sup> | 2.33·10 <sup>-1</sup> | 9.26·10 <sup>-2</sup> | 5.05·10 <sup>-2</sup> | 7.05·10 <sup>-2</sup> | 54.1% | 10.7% | 5.86% | 9.60% | 4.92% | 1.34% |
| 25 | 128.8 | 112.6 | 134.6 | 228320 | 6.75·10 <sup>-3</sup> | 2.10·10 <sup>-2</sup> | 2.29·10 <sup>-1</sup> | 9.29·10 <sup>-2</sup> | 5.06·10 <sup>-2</sup> | 7.46·10 <sup>-2</sup> | 53.1% | 10.8% | 5.87% | 10.2% | 4.88% | 1.39% |
| 26 | 126.7 | 113.0 | 132.2 | 252598 | 7.30·10 <sup>-3</sup> | 2.12·10 <sup>-2</sup> | 2.28·10 <sup>-1</sup> | 9.33·10 <sup>-2</sup> | 5.09·10 <sup>-2</sup> | 7.20·10 <sup>-2</sup> | 53.0% | 10.8% | 5.91% | 9.81% | 4.92% | 1.50% |
| 27 | 124.6 | 113.2 | 129.8 | 233113 | 7.78·10 <sup>-3</sup> | 2.12·10 <sup>-2</sup> | 2.26·10 <sup>-1</sup> | 9.33·10 <sup>-2</sup> | 5.10·10 <sup>-2</sup> | 9.11·10 <sup>-2</sup> | 52.5% | 10.8% | 5.92% | 12.4% | 4.92% | 1.60% |
| 28 | 122.5 | 113.4 | 127.4 | 238504 | 8.26·10 <sup>-3</sup> | 2.10·10 <sup>-2</sup> | 2.23·10 <sup>-1</sup> | 9.22·10 <sup>-2</sup> | 5.03·10 <sup>-2</sup> | 8.59·10 <sup>-2</sup> | 51.7% | 10.7% | 5.84% | 11.7% | 4.88% | 1.69% |
| 29 | 120.3 | 113.5 | 125.0 | 227079 | 9.10·10 <sup>-3</sup> | 2.08·10 <sup>-2</sup> | 2.19·10 <sup>-1</sup> | 9.15·10 <sup>-2</sup> | 4.99·10 <sup>-2</sup> | 9.48·10 <sup>-2</sup> | 50.7% | 10.6% | 5.79% | 12.9% | 4.84% | 1.86% |
| 30 | 118.2 | 113.6 | 122.6 | 235982 | 9.48·10 <sup>-3</sup> | 2.08·10 <sup>-2</sup> | 2.17·10 <sup>-1</sup> | 9.24·10 <sup>-2</sup> | 5.04·10 <sup>-2</sup> | 8.95·10 <sup>-2</sup> | 50.4% | 10.7% | 5.85% | 12.2% | 4.82% | 1.93% |
| 31 | 116.1 | 113.8 | 120.2 | 246683 | 1.16·10 <sup>-2</sup> | 2.04·10 <sup>-2</sup> | 2.12·10 <sup>-1</sup> | 9.41·10 <sup>-2</sup> | 5.12·10 <sup>-2</sup> | 9.35·10 <sup>-2</sup> | 49.2% | 10.9% | 5.94% | 12.7% | 4.74% | 2.34% |
| 32 | 114.0 | 114.0 | 117.8 | 236289 | 1.03·10 <sup>-2</sup> | 2.08·10 <sup>-2</sup> | 2.16·10 <sup>-1</sup> | 9.36·10 <sup>-2</sup> | 5.11·10 <sup>-2</sup> | 1.12·10 <sup>-1</sup> | 50.2% | 10.9% | 5.93% | 15.2% | 4.83% | 2.10% |
| 33 | 111.9 | 114.1 | 115.4 | 220826 | 1.31·10 <sup>-2</sup> | 2.03·10 <sup>-2</sup> | 2.10·10 <sup>-1</sup> | 9.23·10 <sup>-2</sup> | 5.02·10 <sup>-2</sup> | 1.10·10 <sup>-1</sup> | 48.7% | 10.7% | 5.83% | 15.0% | 4.70% | 2.64% |
| 34 | 109.7 | 114.2 | 112.9 | 254450 | 1.43·10 <sup>-2</sup> | 2.00·10 <sup>-2</sup> | 2.08·10 <sup>-1</sup> | 9.36·10 <sup>-2</sup> | 5.11·10 <sup>-2</sup> | 9.34·10 <sup>-2</sup> | 48.3% | 10.9% | 5.93% | 12.7% | 4.64% | 2.87% |
| 35 | 107.6 | 114.3 | 110.5 | 221751 | 1.56·10 <sup>-2</sup> | 1.95·10 <sup>-2</sup> | 2.05·10 <sup>-1</sup> | 9.28·10 <sup>-2</sup> | 5.05·10 <sup>-2</sup> | 1.30·10 <sup>-1</sup> | 47.6% | 10.8% | 5.86% | 17.7% | 4.52% | 3.12% |
| 36 | 105.5 | 114.1 | 108.1 | 233204 | 1.68·10 <sup>-2</sup> | 1.91·10 <sup>-2</sup> | 2.03·10 <sup>-1</sup> | 9.31·10 <sup>-2</sup> | 5.06·10 <sup>-2</sup> | 1.09·10 <sup>-1</sup> | 47.1% | 10.8% | 5.87% | 14.8% | 4.44% | 3.36% |
| 37 | 103.4 | 114.7 | 105.7 | 259630 | 2.00·10 <sup>-2</sup> | 1.86·10 <sup>-2</sup> | 2.01·10 <sup>-1</sup> | 9.57·10 <sup>-2</sup> | 5.21·10 <sup>-2</sup> | 1.06·10 <sup>-1</sup> | 46.7% | 11.1% | 6.05% | 14.4% | 4.32% | 3.99% |
| 38 | 101.3 | 114.7 | 103.3 | 243198 | 2.50·10 <sup>-2</sup> | 1.78·10 <sup>-2</sup> | 1.96·10 <sup>-1</sup> | 9.50·10 <sup>-2</sup> | 5.18·10 <sup>-2</sup> | 1.33·10 <sup>-1</sup> | 45.5% | 11.0% | 6.01% | 18.1% | 4.12% | 4.98% |
| 39 | 99.2  | 114.8 | 100.8 | 227043 | 3.02·10 <sup>-2</sup> | 1.69·10 <sup>-2</sup> | 1.92·10 <sup>-1</sup> | 9.39·10 <sup>-2</sup> | 5.11·10 <sup>-2</sup> | 1.34·10 <sup>-1</sup> | 44.6% | 10.9% | 5.93% | 18.3% | 3.92% | 5.99% |
| 40 | 97.0  | 114.6 | 98.4  | 220435 | 3.52·10 <sup>-2</sup> | 1.60·10 <sup>-2</sup> | 1.88·10 <sup>-1</sup> | 9.45·10 <sup>-2</sup> | 5.14·10 <sup>-2</sup> | 1.29·10 <sup>-1</sup> | 43.7% | 11.0% | 5.96% | 17.6% | 3.71% | 6.99% |
| 41 | 94.9  | 114.6 | 96.0  | 231694 | 3.98·10 <sup>-2</sup> | 1.51·10 <sup>-2</sup> | 1.84·10 <sup>-1</sup> | 9.35·10 <sup>-2</sup> | 5.07·10 <sup>-2</sup> | 1.22·10 <sup>-1</sup> | 42.7% | 10.8% | 5.89% | 16.6% | 3.50% | 7.88% |
| 42 | 92.8  | 114.8 | 93.6  | 281435 | 4.75·10 <sup>-2</sup> | 1.40·10 <sup>-2</sup> | 1.81·10 <sup>-1</sup> | 9.69·10 <sup>-2</sup> | 5.29·10 <sup>-2</sup> | 1.05·10 <sup>-1</sup> | 42.0% | 11.2% | 6.14% | 14.4% | 3.25% | 9.40% |
| 43 | 90.7  | 114.9 | 91.1  | 239149 | 5.64·10 <sup>-2</sup> | 1.20·10 <sup>-2</sup> | 1.71·10 <sup>-1</sup> | 9.25·10 <sup>-2</sup> | 5.03·10 <sup>-2</sup> | 1.58·10 <sup>-1</sup> | 39.8% | 10.7% | 5.84% | 21.5% | 2.79% | 11.2% |
| 44 | 88.6  | 114.8 | 88.7  | 255763 | 6.39·10 <sup>-2</sup> | 1.11·10 <sup>-2</sup> | 1.70·10 <sup>-1</sup> | 9.56·10 <sup>-2</sup> | 5.21·10 <sup>-2</sup> | 1.20·10 <sup>-1</sup> | 39.5% | 11.1% | 6.04% | 16.3% | 2.58% | 12.6% |
| 45 | 86.4  | 114.8 | 86.3  | 229396 | 7.19·10 <sup>-2</sup> | 9.70·10 <sup>-3</sup> | 1.64·10 <sup>-1</sup> | 9.42·10 <sup>-2</sup> | 5.12·10 <sup>-2</sup> | 1.48·10 <sup>-1</sup> | 38.0% | 10.9% | 5.94% | 20.1% | 2.25% | 14.2% |
| 46 | 84.3  | 114.9 | 83.8  | 249088 | 8.21·10 <sup>-2</sup> | 8.21·10 <sup>-3</sup> | 1.59·10 <sup>-1</sup> | 9.49·10 <sup>-2</sup> | 5.17·10 <sup>-2</sup> | 1.20·10 <sup>-1</sup> | 36.9% | 11.0% | 5.99% | 16.3% | 1.90% | 16.2% |
| 47 | 82.2  | 115.0 | 81.4  | 244605 | 9.53·10 <sup>-2</sup> | 6.57·10 <sup>-3</sup> | 1.53·10 <sup>-1</sup> | 9.54·10 <sup>-2</sup> | 5.20·10 <sup>-2</sup> | 1.32·10 <sup>-1</sup> | 35.5% | 11.1% | 6.03% | 18.0% | 1.52% | 18.8% |
| 48 | 80.1  | 114.4 | 79.0  | 225833 | 1.04·10 <sup>-1</sup> | 5.43·10 <sup>-3</sup> | 1.45·10 <sup>-1</sup> | 9.19·10 <sup>-2</sup> | 4.99·10 <sup>-2</sup> | 1.38·10 <sup>-1</sup> | 33.7% | 10.7% | 5.79% | 18.8% | 1.26% | 20.5% |
| 49 | 78.0  | 115.0 | 76.6  | 286773 | 1.17·10 <sup>-1</sup> | 4.45·10 <sup>-3</sup> | 1.42·10 <sup>-1</sup> | 9.69·10 <sup>-2</sup> | 5.28·10 <sup>-2</sup> | 9.52·10 <sup>-2</sup> | 32.9% | 11.2% | 6.12% | 13.0% | 1.03% | 23.1% |
| 50 | 75.8  | 115.0 | 74.1  | 250257 | 1.35·10 <sup>-1</sup> | 2.99·10 <sup>-3</sup> | 1.32·10 <sup>-1</sup> | 9.38·10 <sup>-2</sup> | 5.09·10 <sup>-2</sup> | 1.46·10 <sup>-1</sup> | 30.7% | 10.9% | 5.91% | 19.8% | 0.69% | 26.5% |
| 51 | 73.7  | 114.9 | 71.7  | 237633 | 1.55·10 <sup>-1</sup> | 1.56·10 <sup>-3</sup> | 1.21·10 <sup>-1</sup> | 9.24·10 <sup>-2</sup> | 5.02·10 <sup>-2</sup> | 1.26·10 <sup>-1</sup> | 28.1% | 10.7% | 5.82% | 17.1% | 0.36% | 30.5% |
| 52 | 71.6  | 114.8 | 69.3  | 253777 | 1.66·10 <sup>-1</sup> | 1.12·10 <sup>-3</sup> | 1.15·10 <sup>-1</sup> | 9.33·10 <sup>-2</sup> | 5.08·10 <sup>-2</sup> | 1.05·10 <sup>-1</sup> | 26.8% | 10.8% | 5.89% | 14.3% | 0.26% | 32.6% |

|    |      |       |      |        |                      |                      |                      |                      |                      |                      |       |       |       |       |       |       |
|----|------|-------|------|--------|----------------------|----------------------|----------------------|----------------------|----------------------|----------------------|-------|-------|-------|-------|-------|-------|
| 53 | 69.5 | 114.8 | 66.9 | 278634 | $1.77 \cdot 10^{-1}$ | $6.89 \cdot 10^{-4}$ | $1.09 \cdot 10^{-1}$ | $9.43 \cdot 10^{-2}$ | $5.13 \cdot 10^{-2}$ | $1.03 \cdot 10^{-1}$ | 25.3% | 10.9% | 5.95% | 14.0% | 0.16% | 34.9% |
| 54 | 67.4 | 114.7 | 64.4 | 276581 | $1.91 \cdot 10^{-1}$ | $3.58 \cdot 10^{-4}$ | $1.02 \cdot 10^{-1}$ | $9.34 \cdot 10^{-2}$ | $5.08 \cdot 10^{-2}$ | $1.13 \cdot 10^{-1}$ | 23.8% | 10.8% | 5.90% | 15.4% | 0.08% | 37.5% |
| 55 | 65.3 | 114.6 | 62.0 | 237512 | $1.92 \cdot 10^{-1}$ | $2.53 \cdot 10^{-4}$ | $9.79 \cdot 10^{-2}$ | $9.25 \cdot 10^{-2}$ | $5.02 \cdot 10^{-2}$ | $1.26 \cdot 10^{-1}$ | 22.7% | 10.7% | 5.83% | 17.2% | 0.06% | 37.8% |
| 56 | 63.1 | 114.7 | 59.6 | 236712 | $2.03 \cdot 10^{-1}$ | $1.44 \cdot 10^{-4}$ | $9.24 \cdot 10^{-2}$ | $9.15 \cdot 10^{-2}$ | $4.97 \cdot 10^{-2}$ | $1.07 \cdot 10^{-1}$ | 21.4% | 10.6% | 5.76% | 14.6% | 0.03% | 40.0% |
| 57 | 61.0 | 114.7 | 57.2 | 238023 | $2.09 \cdot 10^{-1}$ | $3.36 \cdot 10^{-5}$ | $8.63 \cdot 10^{-2}$ | $8.97 \cdot 10^{-2}$ | $4.86 \cdot 10^{-2}$ | $1.03 \cdot 10^{-1}$ | 20.0% | 10.4% | 5.64% | 14.0% | 0.01% | 41.1% |
| 58 | 58.9 | 114.5 | 54.8 | 268091 | $2.24 \cdot 10^{-1}$ | $2.61 \cdot 10^{-5}$ | $8.08 \cdot 10^{-2}$ | $8.99 \cdot 10^{-2}$ | $4.88 \cdot 10^{-2}$ | $8.86 \cdot 10^{-2}$ | 18.8% | 10.4% | 5.66% | 12.1% | 0.01% | 44.1% |
| 59 | 56.8 | 114.3 | 52.4 | 250037 | $2.27 \cdot 10^{-1}$ | $1.20 \cdot 10^{-5}$ | $7.64 \cdot 10^{-2}$ | $8.77 \cdot 10^{-2}$ | $4.76 \cdot 10^{-2}$ | $1.04 \cdot 10^{-1}$ | 17.7% | 10.2% | 5.52% | 14.2% | 0.00% | 44.6% |
| 60 | 54.7 | 114.1 | 50.0 | 260607 | $2.34 \cdot 10^{-1}$ | $1.15 \cdot 10^{-5}$ | $7.51 \cdot 10^{-2}$ | $8.84 \cdot 10^{-2}$ | $4.81 \cdot 10^{-2}$ | $8.95 \cdot 10^{-2}$ | 17.4% | 10.3% | 5.58% | 12.2% | 0.00% | 46.0% |
| 61 | 52.5 | 113.8 | 47.6 | 276793 | $2.43 \cdot 10^{-1}$ | $3.61 \cdot 10^{-6}$ | $7.14 \cdot 10^{-2}$ | $8.62 \cdot 10^{-2}$ | $4.68 \cdot 10^{-2}$ | $8.80 \cdot 10^{-2}$ | 16.6% | 10.0% | 5.43% | 12.0% | 0.00% | 47.8% |
| 62 | 50.4 | 113.4 | 45.2 | 238283 | $2.47 \cdot 10^{-1}$ | 0.00                 | $6.84 \cdot 10^{-2}$ | $8.27 \cdot 10^{-2}$ | $4.50 \cdot 10^{-2}$ | $1.01 \cdot 10^{-1}$ | 15.9% | 9.60% | 5.22% | 13.8% | 0.00% | 48.6% |
| 63 | 48.3 | 112.7 | 42.8 | 226196 | $2.61 \cdot 10^{-1}$ | 0.00                 | $6.48 \cdot 10^{-2}$ | $8.02 \cdot 10^{-2}$ | $4.36 \cdot 10^{-2}$ | $8.57 \cdot 10^{-2}$ | 15.0% | 9.30% | 5.06% | 11.7% | 0.00% | 51.3% |
| 64 | 46.2 | 111.6 | 40.4 | 285215 | $2.67 \cdot 10^{-1}$ | 0.00                 | $6.29 \cdot 10^{-2}$ | $8.01 \cdot 10^{-2}$ | $4.37 \cdot 10^{-2}$ | $5.92 \cdot 10^{-2}$ | 14.6% | 9.29% | 5.07% | 8.07% | 0.00% | 52.6% |
| 65 | 44.1 | 110.7 | 38.1 | 294821 | $2.77 \cdot 10^{-1}$ | 0.00                 | $6.29 \cdot 10^{-2}$ | $8.04 \cdot 10^{-2}$ | $4.39 \cdot 10^{-2}$ | $7.00 \cdot 10^{-2}$ | 14.6% | 9.34% | 5.09% | 9.54% | 0.00% | 54.5% |
| 66 | 41.9 | 109.8 | 35.8 | 316725 | $2.83 \cdot 10^{-1}$ | 0.00                 | $5.77 \cdot 10^{-2}$ | $7.34 \cdot 10^{-2}$ | $4.01 \cdot 10^{-2}$ | $6.59 \cdot 10^{-2}$ | 13.4% | 8.51% | 4.65% | 8.98% | 0.00% | 55.7% |
| 67 | 39.8 | 108.9 | 33.5 | 270764 | $3.00 \cdot 10^{-1}$ | 0.00                 | $5.58 \cdot 10^{-2}$ | $7.22 \cdot 10^{-2}$ | $3.94 \cdot 10^{-2}$ | $6.94 \cdot 10^{-2}$ | 13.0% | 8.38% | 4.58% | 9.45% | 0.00% | 58.9% |
| 68 | 37.7 | 109.4 | 31.2 | 231788 | $3.05 \cdot 10^{-1}$ | 0.00                 | $5.27 \cdot 10^{-2}$ | $6.88 \cdot 10^{-2}$ | $3.76 \cdot 10^{-2}$ | $6.36 \cdot 10^{-2}$ | 12.2% | 7.98% | 4.37% | 8.67% | 0.00% | 60.0% |
| 69 | 35.6 | 110.4 | 28.9 | 254380 | $3.13 \cdot 10^{-1}$ | 0.00                 | $4.98 \cdot 10^{-2}$ | $6.58 \cdot 10^{-2}$ | $3.61 \cdot 10^{-2}$ | $4.57 \cdot 10^{-2}$ | 11.6% | 7.64% | 4.19% | 6.23% | 0.00% | 61.6% |
| 70 | 33.5 | 110.1 | 26.6 | 273213 | $3.26 \cdot 10^{-1}$ | 0.00                 | $4.72 \cdot 10^{-2}$ | $6.36 \cdot 10^{-2}$ | $3.49 \cdot 10^{-2}$ | $4.26 \cdot 10^{-2}$ | 11.0% | 7.38% | 4.05% | 5.80% | 0.00% | 64.2% |
| 71 | 31.4 | 111.3 | 24.3 | 266261 | $3.39 \cdot 10^{-1}$ | 0.00                 | $4.37 \cdot 10^{-2}$ | $5.95 \cdot 10^{-2}$ | $3.27 \cdot 10^{-2}$ | $4.23 \cdot 10^{-2}$ | 10.1% | 6.90% | 3.80% | 5.76% | 0.00% | 66.6% |
| 72 | 29.2 | 111.4 | 22.0 | 258217 | $3.49 \cdot 10^{-1}$ | 0.00                 | $4.00 \cdot 10^{-2}$ | $5.58 \cdot 10^{-2}$ | $3.07 \cdot 10^{-2}$ | $3.68 \cdot 10^{-2}$ | 9.29% | 6.48% | 3.56% | 5.01% | 0.00% | 68.7% |
| 73 | 27.1 | 111.1 | 19.7 | 287101 | $3.62 \cdot 10^{-1}$ | 0.00                 | $3.60 \cdot 10^{-2}$ | $5.15 \cdot 10^{-2}$ | $2.84 \cdot 10^{-2}$ | $2.84 \cdot 10^{-2}$ | 8.35% | 5.98% | 3.30% | 3.87% | 0.00% | 71.3% |
| 74 | 25.0 | 110.7 | 17.5 | 283057 | $3.80 \cdot 10^{-1}$ | 0.00                 | $3.22 \cdot 10^{-2}$ | $4.80 \cdot 10^{-2}$ | $2.65 \cdot 10^{-2}$ | $2.69 \cdot 10^{-2}$ | 7.47% | 5.57% | 3.08% | 3.67% | 0.00% | 74.6% |
| 75 | 22.9 | 109.0 | 15.2 | 239673 | $3.90 \cdot 10^{-1}$ | 0.00                 | $2.80 \cdot 10^{-2}$ | $4.34 \cdot 10^{-2}$ | $2.41 \cdot 10^{-2}$ | $2.65 \cdot 10^{-2}$ | 6.49% | 5.04% | 2.79% | 3.61% | 0.00% | 76.7% |
| 76 | 20.8 | 105.9 | 13.0 | 238391 | $4.11 \cdot 10^{-1}$ | 0.00                 | $2.23 \cdot 10^{-2}$ | $3.63 \cdot 10^{-2}$ | $2.02 \cdot 10^{-2}$ | $1.86 \cdot 10^{-2}$ | 5.17% | 4.21% | 2.34% | 2.53% | 0.00% | 80.7% |
| 77 | 18.6 | 103.0 | 10.9 | 237222 | $4.25 \cdot 10^{-1}$ | 0.00                 | $1.75 \cdot 10^{-2}$ | $3.05 \cdot 10^{-2}$ | $1.70 \cdot 10^{-2}$ | $1.34 \cdot 10^{-2}$ | 4.06% | 3.53% | 1.98% | 1.82% | 0.00% | 83.6% |
| 78 | 16.5 | 100.1 | 8.8  | 276563 | $4.38 \cdot 10^{-1}$ | 0.00                 | $1.40 \cdot 10^{-2}$ | $2.61 \cdot 10^{-2}$ | $1.46 \cdot 10^{-2}$ | $8.37 \cdot 10^{-3}$ | 3.26% | 3.03% | 1.70% | 1.14% | 0.00% | 86.1% |
| 79 | 14.4 | 91.5  | 6.8  | 319017 | $4.44 \cdot 10^{-1}$ | 0.00                 | $1.05 \cdot 10^{-2}$ | $2.13 \cdot 10^{-2}$ | $1.20 \cdot 10^{-2}$ | $6.46 \cdot 10^{-3}$ | 2.43% | 2.48% | 1.39% | 0.88% | 0.00% | 87.2% |
| 80 | 12.3 | 78.3  | 5.0  | 318741 | $4.60 \cdot 10^{-1}$ | 0.00                 | $7.56 \cdot 10^{-3}$ | $1.77 \cdot 10^{-2}$ | $9.96 \cdot 10^{-3}$ | $5.21 \cdot 10^{-3}$ | 1.75% | 2.05% | 1.16% | 0.71% | 0.00% | 90.5% |
| 81 | 10.2 | 69.4  | 3.5  | 243650 | $4.76 \cdot 10^{-1}$ | 0.00                 | $5.09 \cdot 10^{-3}$ | $1.40 \cdot 10^{-2}$ | $7.96 \cdot 10^{-3}$ | $4.89 \cdot 10^{-3}$ | 1.18% | 1.62% | 0.92% | 0.67% | 0.00% | 93.6% |
| 82 | 8.1  | 60.5  | 2.2  | 255433 | $4.87 \cdot 10^{-1}$ | 0.00                 | $3.23 \cdot 10^{-3}$ | $1.07 \cdot 10^{-2}$ | $6.08 \cdot 10^{-3}$ | $2.52 \cdot 10^{-3}$ | 0.75% | 1.24% | 0.71% | 0.34% | 0.00% | 95.8% |

|    |     |      |     |        |                      |      |                      |                      |                      |                      |       |       |       |       |       |       |
|----|-----|------|-----|--------|----------------------|------|----------------------|----------------------|----------------------|----------------------|-------|-------|-------|-------|-------|-------|
| 83 | 5.9 | 48.0 | 1.2 | 280209 | $4.87 \cdot 10^{-1}$ | 0.00 | $1.87 \cdot 10^{-3}$ | $7.58 \cdot 10^{-3}$ | $4.31 \cdot 10^{-3}$ | $1.59 \cdot 10^{-3}$ | 0.43% | 0.88% | 0.50% | 0.22% | 0.00% | 95.7% |
| 84 | 3.8 | 16.7 | 0.4 | 304730 | $4.97 \cdot 10^{-1}$ | 0.00 | $1.14 \cdot 10^{-3}$ | $5.48 \cdot 10^{-3}$ | $3.16 \cdot 10^{-3}$ | $1.08 \cdot 10^{-3}$ | 0.26% | 0.64% | 0.37% | 0.15% | 0.00% | 97.7% |
| 85 | 1.7 | 10.4 | 0.1 | 300733 | $5.01 \cdot 10^{-1}$ | 0.00 | $7.08 \cdot 10^{-4}$ | $3.53 \cdot 10^{-3}$ | $2.05 \cdot 10^{-3}$ | $6.90 \cdot 10^{-4}$ | 0.16% | 0.41% | 0.24% | 0.09% | 0.00% | 98.4% |
| 86 | 0.0 | 4.0  | 0.0 | 267768 | $5.09 \cdot 10^{-1}$ | 0.00 | $3.77 \cdot 10^{-4}$ | $2.22 \cdot 10^{-3}$ | $1.29 \cdot 10^{-3}$ | $5.39 \cdot 10^{-4}$ | 0.09% | 0.26% | 0.15% | 0.07% | 0.00% | 99.3% |

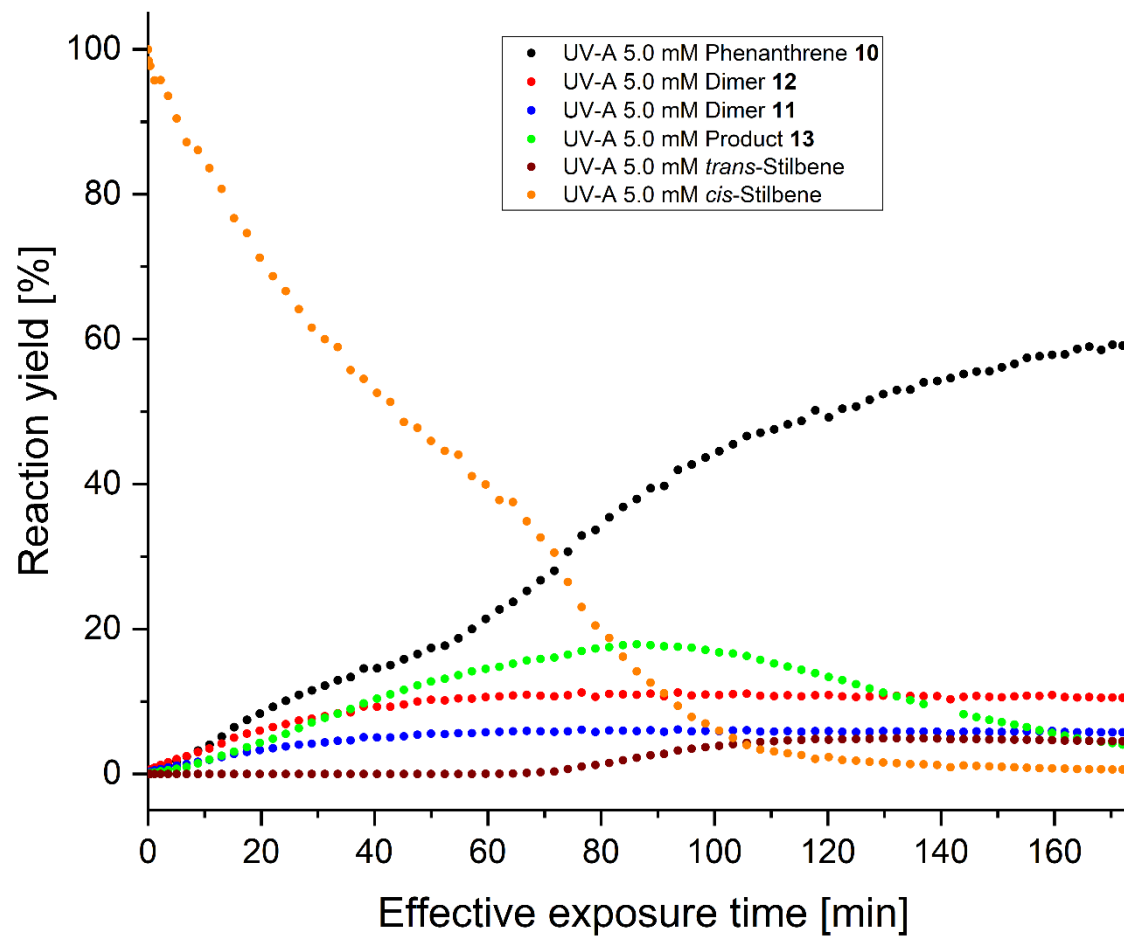

Figure S 17. Results of Switch-Off optimisation of Mallory photoreaction using UV-A light and 50.0 mM stilbene concentration. Top: Reaction components GC areas, conversion, and yield plotted against uncorrected residence time. Bottom: Reaction components GC areas, conversion, and yield plotted against exposure time, corrected for light inhomogeneity.

### 2. 4. 2. 3. Switch-Off experiment results using UV-B light and 5.0 mM stilbene concentration

*Cis*-stilbene (44.5  $\mu$ L, 45.0 mg, 0.25 mmol, 1.0 eq., 5.0 mM solution), iodine (6.3 mg, 0.025 mmol, 0.1 eq., 0.5 mM solution), and dibutyl ether (0.15 mL, 117.1 mg, 0.90 mmol, 3.6 eq., 18.0 mM solution) were dissolved in cyclohexane (50.0 mL, 1111.1 vol.), obtained solution was saturated with oxygen by bubbling gaseous O<sub>2</sub> for 15 minutes, and then connected to flow reagents stream. Cyclohexane was connected to flow solvents stream. The UV-B lamp (Philips PL-L 36W/01/4P) and water cooling were then turned on and system was allowed to equilibrate for 30 minutes. Then reaction mixture was injected into the photoreactor (internal volume of 31.8 mL, 1.00 mm I.D., 1.60 mm O.D., PFA). Effective exposure time was set to 45 minutes (which corresponds to 0.707 mL/min flow rate). Once the photoreactor was filled with reaction mixture, the UV lamp was switched off, the pump was switched to solvent stream, the reaction mixture was eluted from the photoreactor, and was collected into vials (0.375 mL of reaction mixture, diluted to 1.0 mL with acetone). Collected samples were then analysed using off-line GC.

Table S 13. Results of Switch-Off optimisation performed for Mallory reaction of *cis*-stilbene using UV-B light and 5.0 mM stilbene concentration.

| #  | Residence time [min] | Included/Excluded | Reactor volume [mL] | Effective Reactor Volume [mL] | Effective exposure time [min] | IS GC Area | Area Ratio <i>cis</i> -Stilbene/IS | Area Ratio <i>trans</i> -Stilbene/IS | Area Ratio Phenanthrene 10/IS | Area Ratio Dimer ABAB 12/IS | Area Ratio Dimer AABB 11/IS | Area Ratio Product 13/IS | Phenanthrene yield [%] | Dimer 12 yield [%] | Dimer 11 yield [%] | Product 13 yield [%] | <i>trans</i> -Stilbene yield [%] | Remaining <i>cis</i> -Stilbene [%] |
|----|----------------------|-------------------|---------------------|-------------------------------|-------------------------------|------------|------------------------------------|--------------------------------------|-------------------------------|-----------------------------|-----------------------------|--------------------------|------------------------|--------------------|--------------------|----------------------|----------------------------------|------------------------------------|
| 1  | 45.0                 | Excluded          | 31.8                | -                             | -                             | -          | -                                  | -                                    | -                             | -                           | -                           | -                        | -                      | -                  | -                  | -                    | -                                | -                                  |
| 2  | 44.4                 | Excluded          | 31.4                | -                             | -                             | -          | -                                  | -                                    | -                             | -                           | -                           | -                        | -                      | -                  | -                  | -                    | -                                | -                                  |
| 3  | 43.9                 | Excluded          | 31.1                | -                             | -                             | -          | -                                  | -                                    | -                             | -                           | -                           | -                        | -                      | -                  | -                  | -                    | -                                | -                                  |
| 4  | 43.4                 | Excluded          | 30.7                | -                             | -                             | -          | -                                  | -                                    | -                             | -                           | -                           | -                        | -                      | -                  | -                  | -                    | -                                | -                                  |
| 5  | 42.9                 | Excluded          | 30.3                | -                             | -                             | -          | -                                  | -                                    | -                             | -                           | -                           | -                        | -                      | -                  | -                  | -                    | -                                | -                                  |
| 6  | 42.3                 | Included          | 29.9                | 28.5                          | 40.3                          | 214976     | 0.00                               | 5.65·10 <sup>-2</sup>                | 3.08·10 <sup>-1</sup>         | 4.14·10 <sup>-2</sup>       | 2.05·10 <sup>-2</sup>       | 1.90·10 <sup>-4</sup>    | 71.4%                  | 4.80%              | 4.75%              | 0.04%                | 13.1%                            | 0.00%                              |
| 7  | 41.8                 | Included          | 29.6                | 28.1                          | 39.8                          | 208518     | 0.00                               | 5.61·10 <sup>-2</sup>                | 3.06·10 <sup>-1</sup>         | 4.08·10 <sup>-2</sup>       | 2.02·10 <sup>-2</sup>       | 2.13·10 <sup>-4</sup>    | 71.1%                  | 4.73%              | 4.68%              | 0.05%                | 13.0%                            | 0.00%                              |
| 8  | 41.3                 | Included          | 29.2                | 27.8                          | 39.3                          | 215194     | 0.00                               | 5.65·10 <sup>-2</sup>                | 3.06·10 <sup>-1</sup>         | 4.05·10 <sup>-2</sup>       | 2.01·10 <sup>-2</sup>       | 3.44·10 <sup>-4</sup>    | 71.0%                  | 4.70%              | 4.65%              | 0.08%                | 13.1%                            | 0.00%                              |
| 9  | 40.7                 | Included          | 28.8                | 27.4                          | 38.7                          | 210371     | 0.00                               | 5.52·10 <sup>-2</sup>                | 3.04·10 <sup>-1</sup>         | 4.00·10 <sup>-2</sup>       | 1.98·10 <sup>-2</sup>       | 1.76·10 <sup>-4</sup>    | 70.5%                  | 4.64%              | 4.59%              | 0.04%                | 12.8%                            | 0.00%                              |
| 10 | 40.2                 | Included          | 28.4                | 27.0                          | 38.2                          | 204481     | 0.00                               | 5.69·10 <sup>-2</sup>                | 3.09·10 <sup>-1</sup>         | 4.12·10 <sup>-2</sup>       | 2.04·10 <sup>-2</sup>       | 1.81·10 <sup>-4</sup>    | 71.8%                  | 4.78%              | 4.73%              | 0.04%                | 13.2%                            | 0.00%                              |
| 11 | 39.7                 | Included          | 28.1                | 26.6                          | 37.7                          | 210276     | 0.00                               | 5.76·10 <sup>-2</sup>                | 3.12·10 <sup>-1</sup>         | 4.18·10 <sup>-2</sup>       | 2.06·10 <sup>-2</sup>       | 2.99·10 <sup>-4</sup>    | 72.3%                  | 4.85%              | 4.78%              | 0.07%                | 13.4%                            | 0.00%                              |
| 12 | 39.1                 | Included          | 27.7                | 26.3                          | 37.1                          | 208870     | 0.00                               | 5.68·10 <sup>-2</sup>                | 3.07·10 <sup>-1</sup>         | 4.09·10 <sup>-2</sup>       | 2.02·10 <sup>-2</sup>       | 2.31·10 <sup>-4</sup>    | 71.3%                  | 4.75%              | 4.69%              | 0.05%                | 13.2%                            | 0.00%                              |
| 13 | 38.6                 | Included          | 27.3                | 25.9                          | 36.6                          | 283342     | 0.00                               | 5.80·10 <sup>-2</sup>                | 3.09·10 <sup>-1</sup>         | 4.19·10 <sup>-2</sup>       | 2.07·10 <sup>-2</sup>       | 2.09·10 <sup>-4</sup>    | 71.8%                  | 4.86%              | 4.80%              | 0.05%                | 13.5%                            | 0.00%                              |
| 14 | 38.1                 | Included          | 26.9                | 25.5                          | 36.1                          | 212297     | 0.00                               | 5.80·10 <sup>-2</sup>                | 3.06·10 <sup>-1</sup>         | 4.06·10 <sup>-2</sup>       | 2.01·10 <sup>-2</sup>       | 4.01·10 <sup>-4</sup>    | 70.9%                  | 4.71%              | 4.66%              | 0.09%                | 13.5%                            | 0.00%                              |
| 15 | 37.6                 | Included          | 26.6                | 25.1                          | 35.5                          | 201569     | 0.00                               | 5.92·10 <sup>-2</sup>                | 3.18·10 <sup>-1</sup>         | 4.20·10 <sup>-2</sup>       | 2.07·10 <sup>-2</sup>       | 3.67·10 <sup>-4</sup>    | 73.8%                  | 4.88%              | 4.80%              | 0.09%                | 13.7%                            | 0.00%                              |
| 16 | 37.0                 | Included          | 26.2                | 24.8                          | 35.0                          | 226519     | 0.00                               | 5.99·10 <sup>-2</sup>                | 3.14·10 <sup>-1</sup>         | 4.18·10 <sup>-2</sup>       | 2.06·10 <sup>-2</sup>       | 3.11·10 <sup>-4</sup>    | 72.9%                  | 4.85%              | 4.78%              | 0.07%                | 13.9%                            | 0.00%                              |

|    |      |          |      |      |      |        |      |                       |                       |                       |                       |                       |       |       |       |       |       |       |
|----|------|----------|------|------|------|--------|------|-----------------------|-----------------------|-----------------------|-----------------------|-----------------------|-------|-------|-------|-------|-------|-------|
| 17 | 36.5 | Included | 25.8 | 24.4 | 34.5 | 211318 | 0.00 | 5.89·10 <sup>-2</sup> | 3.09·10 <sup>-1</sup> | 4.11·10 <sup>-2</sup> | 2.03·10 <sup>-2</sup> | 8.76·10 <sup>-4</sup> | 71.7% | 0.48% | 4.71% | 0.02% | 13.7% | 0.00% |
| 18 | 36.0 | Included | 25.4 | 24.0 | 33.9 | 204693 | 0.00 | 5.86·10 <sup>-2</sup> | 3.06·10 <sup>-1</sup> | 4.08·10 <sup>-2</sup> | 2.01·10 <sup>-2</sup> | 2.90·10 <sup>-4</sup> | 70.9% | 4.74% | 4.66% | 0.07% | 13.6% | 0.00% |
| 19 | 35.4 | Included | 25.1 | 23.6 | 33.4 | 210676 | 0.00 | 5.95·10 <sup>-2</sup> | 3.07·10 <sup>-1</sup> | 4.11·10 <sup>-2</sup> | 2.02·10 <sup>-2</sup> | 1.23·10 <sup>-4</sup> | 71.3% | 4.76% | 4.68% | 0.03% | 13.8% | 0.00% |
| 20 | 34.9 | Included | 24.7 | 23.3 | 32.9 | 254726 | 0.00 | 5.89·10 <sup>-2</sup> | 3.06·10 <sup>-1</sup> | 4.09·10 <sup>-2</sup> | 2.02·10 <sup>-2</sup> | 2.76·10 <sup>-4</sup> | 71.0% | 4.74% | 4.68% | 0.06% | 13.7% | 0.00% |
| 21 | 34.4 | Included | 24.3 | 22.9 | 32.4 | 223956 | 0.00 | 5.97·10 <sup>-2</sup> | 3.06·10 <sup>-1</sup> | 4.14·10 <sup>-2</sup> | 2.04·10 <sup>-2</sup> | 1.16·10 <sup>-4</sup> | 71.1% | 4.81% | 4.74% | 0.03% | 13.8% | 0.00% |
| 22 | 33.8 | Included | 23.9 | 22.5 | 31.8 | 179275 | 0.00 | 6.05·10 <sup>-2</sup> | 3.07·10 <sup>-1</sup> | 4.09·10 <sup>-2</sup> | 2.02·10 <sup>-2</sup> | 2.27·10 <sup>-4</sup> | 71.3% | 4.75% | 4.68% | 0.05% | 14.1% | 0.00% |
| 23 | 33.3 | Included | 23.6 | 22.1 | 31.3 | 325872 | 0.00 | 6.06·10 <sup>-2</sup> | 3.05·10 <sup>-1</sup> | 4.21·10 <sup>-2</sup> | 2.08·10 <sup>-2</sup> | 6.82·10 <sup>-5</sup> | 70.8% | 4.89% | 4.83% | 0.02% | 14.1% | 0.00% |
| 24 | 32.8 | Included | 23.2 | 21.8 | 30.8 | 185317 | 0.00 | 6.03·10 <sup>-2</sup> | 3.00·10 <sup>-1</sup> | 3.96·10 <sup>-2</sup> | 1.95·10 <sup>-2</sup> | 7.99·10 <sup>-5</sup> | 69.7% | 4.59% | 4.52% | 0.02% | 14.0% | 0.00% |
| 25 | 32.2 | Included | 22.8 | 21.4 | 30.2 | 207678 | 0.00 | 6.19·10 <sup>-2</sup> | 3.07·10 <sup>-1</sup> | 4.11·10 <sup>-2</sup> | 2.02·10 <sup>-2</sup> | 3.39·10 <sup>-4</sup> | 71.3% | 4.77% | 4.69% | 0.08% | 14.4% | 0.00% |
| 26 | 31.7 | Included | 22.4 | 21.0 | 29.7 | 211265 | 0.00 | 6.15·10 <sup>-2</sup> | 3.04·10 <sup>-1</sup> | 4.08·10 <sup>-2</sup> | 2.01·10 <sup>-2</sup> | 1.40·10 <sup>-4</sup> | 70.6% | 4.73% | 4.66% | 0.03% | 14.3% | 0.00% |
| 27 | 31.2 | Included | 22.1 | 20.6 | 29.2 | 215651 | 0.00 | 6.19·10 <sup>-2</sup> | 3.04·10 <sup>-1</sup> | 4.06·10 <sup>-2</sup> | 2.00·10 <sup>-2</sup> | 4.12·10 <sup>-4</sup> | 70.6% | 4.72% | 4.64% | 0.10% | 14.4% | 0.00% |
| 28 | 30.7 | Included | 21.7 | 20.3 | 28.6 | 216570 | 0.00 | 6.18·10 <sup>-2</sup> | 3.04·10 <sup>-1</sup> | 4.08·10 <sup>-2</sup> | 2.01·10 <sup>-2</sup> | 3.08·10 <sup>-4</sup> | 70.5% | 4.73% | 4.67% | 0.07% | 14.3% | 0.00% |
| 29 | 30.1 | Included | 21.3 | 19.9 | 28.1 | 221545 | 0.00 | 6.23·10 <sup>-2</sup> | 3.03·10 <sup>-1</sup> | 4.06·10 <sup>-2</sup> | 1.99·10 <sup>-2</sup> | 2.51·10 <sup>-4</sup> | 70.2% | 4.71% | 4.62% | 0.06% | 14.5% | 0.00% |
| 30 | 29.6 | Included | 20.9 | 19.5 | 27.6 | 237433 | 0.00 | 6.41·10 <sup>-2</sup> | 3.11·10 <sup>-1</sup> | 4.18·10 <sup>-2</sup> | 2.06·10 <sup>-2</sup> | 2.96·10 <sup>-4</sup> | 72.2% | 4.85% | 4.78% | 0.07% | 14.9% | 0.00% |
| 31 | 29.1 | Included | 20.6 | 19.1 | 27.1 | 244175 | 0.00 | 6.26·10 <sup>-2</sup> | 3.02·10 <sup>-1</sup> | 4.03·10 <sup>-2</sup> | 1.99·10 <sup>-2</sup> | 9.10·10 <sup>-5</sup> | 70.2% | 4.68% | 4.62% | 0.02% | 14.5% | 0.00% |
| 32 | 28.5 | Included | 20.2 | 18.8 | 26.5 | 225254 | 0.00 | 6.27·10 <sup>-2</sup> | 3.02·10 <sup>-1</sup> | 4.03·10 <sup>-2</sup> | 1.98·10 <sup>-2</sup> | 2.14·10 <sup>-4</sup> | 70.0% | 4.67% | 4.60% | 0.05% | 14.6% | 0.00% |
| 33 | 28.0 | Included | 19.8 | 18.4 | 26.0 | 223877 | 0.00 | 6.41·10 <sup>-2</sup> | 3.02·10 <sup>-1</sup> | 4.01·10 <sup>-2</sup> | 1.97·10 <sup>-2</sup> | 3.64·10 <sup>-4</sup> | 70.2% | 4.66% | 4.57% | 0.08% | 14.9% | 0.00% |
| 34 | 27.5 | Included | 19.4 | 18.0 | 25.5 | 244633 | 0.00 | 6.46·10 <sup>-2</sup> | 3.03·10 <sup>-1</sup> | 4.04·10 <sup>-2</sup> | 1.98·10 <sup>-2</sup> | 1.97·10 <sup>-4</sup> | 70.3% | 4.69% | 4.60% | 0.05% | 15.0% | 0.00% |
| 35 | 26.9 | Included | 19.1 | 17.6 | 24.9 | 227477 | 0.00 | 6.73·10 <sup>-2</sup> | 3.09·10 <sup>-1</sup> | 4.14·10 <sup>-2</sup> | 2.03·10 <sup>-2</sup> | 1.30·10 <sup>-4</sup> | 71.8% | 4.81% | 4.72% | 0.03% | 15.6% | 0.00% |
| 36 | 26.4 | Included | 18.7 | 17.3 | 24.4 | 225827 | 0.00 | 6.55·10 <sup>-2</sup> | 3.02·10 <sup>-1</sup> | 4.07·10 <sup>-2</sup> | 2.00·10 <sup>-2</sup> | 9.84·10 <sup>-5</sup> | 70.0% | 4.72% | 4.64% | 0.02% | 15.2% | 0.00% |
| 37 | 25.9 | Included | 18.3 | 16.9 | 23.9 | 230547 | 0.00 | 6.47·10 <sup>-2</sup> | 3.02·10 <sup>-1</sup> | 4.03·10 <sup>-2</sup> | 1.98·10 <sup>-2</sup> | 2.73·10 <sup>-4</sup> | 70.1% | 4.67% | 4.59% | 0.06% | 15.0% | 0.00% |
| 38 | 25.4 | Included | 17.9 | 16.5 | 23.3 | 264884 | 0.00 | 6.64·10 <sup>-2</sup> | 3.03·10 <sup>-1</sup> | 4.09·10 <sup>-2</sup> | 2.01·10 <sup>-2</sup> | 2.52·10 <sup>-4</sup> | 70.4% | 4.75% | 4.65% | 0.06% | 15.4% | 0.00% |
| 39 | 24.8 | Included | 17.6 | 16.1 | 22.8 | 281395 | 0.00 | 6.64·10 <sup>-2</sup> | 3.03·10 <sup>-1</sup> | 4.14·10 <sup>-2</sup> | 2.03·10 <sup>-2</sup> | 2.50·10 <sup>-4</sup> | 70.3% | 4.80% | 4.72% | 0.06% | 15.4% | 0.00% |
| 40 | 24.3 | Included | 17.2 | 15.8 | 22.3 | 229265 | 0.00 | 6.71·10 <sup>-2</sup> | 3.03·10 <sup>-1</sup> | 3.97·10 <sup>-2</sup> | 1.95·10 <sup>-2</sup> | 2.26·10 <sup>-4</sup> | 70.4% | 4.60% | 4.53% | 0.05% | 15.6% | 0.00% |
| 41 | 23.8 | Included | 16.8 | 15.4 | 21.7 | 207086 | 0.00 | 6.86·10 <sup>-2</sup> | 3.06·10 <sup>-1</sup> | 3.91·10 <sup>-2</sup> | 1.93·10 <sup>-2</sup> | 5.19·10 <sup>-4</sup> | 71.0% | 4.54% | 4.47% | 0.12% | 15.9% | 0.00% |
| 42 | 23.2 | Included | 16.4 | 15.0 | 21.2 | 230576 | 0.00 | 6.74·10 <sup>-2</sup> | 3.02·10 <sup>-1</sup> | 3.90·10 <sup>-2</sup> | 1.92·10 <sup>-2</sup> | 2.57·10 <sup>-4</sup> | 70.1% | 4.53% | 4.46% | 0.06% | 15.6% | 0.00% |
| 43 | 22.7 | Included | 16.1 | 14.6 | 20.7 | 278317 | 0.00 | 6.91·10 <sup>-2</sup> | 3.04·10 <sup>-1</sup> | 3.94·10 <sup>-2</sup> | 1.94·10 <sup>-2</sup> | 3.19·10 <sup>-4</sup> | 70.5% | 4.57% | 4.50% | 0.07% | 16.0% | 0.00% |
| 44 | 22.2 | Included | 15.7 | 14.3 | 20.2 | 225406 | 0.00 | 6.98·10 <sup>-2</sup> | 3.03·10 <sup>-1</sup> | 3.95·10 <sup>-2</sup> | 1.94·10 <sup>-2</sup> | 3.61·10 <sup>-4</sup> | 70.3% | 4.58% | 4.50% | 0.08% | 16.2% | 0.00% |
| 45 | 21.6 | Included | 15.3 | 13.9 | 19.6 | 226576 | 0.00 | 6.81·10 <sup>-2</sup> | 3.00·10 <sup>-1</sup> | 3.91·10 <sup>-2</sup> | 1.92·10 <sup>-2</sup> | 1.63·10 <sup>-4</sup> | 69.6% | 4.54% | 4.46% | 0.04% | 15.8% | 0.00% |
| 46 | 21.1 | Included | 14.9 | 13.5 | 19.1 | 245171 | 0.00 | 7.01·10 <sup>-2</sup> | 3.02·10 <sup>-1</sup> | 3.97·10 <sup>-2</sup> | 1.95·10 <sup>-2</sup> | 3.17·10 <sup>-4</sup> | 70.1% | 4.61% | 4.53% | 0.07% | 16.3% | 0.00% |

|    |      |          |      |      |      |        |                       |                       |                       |                       |                       |                       |       |       |       |       |       |       |
|----|------|----------|------|------|------|--------|-----------------------|-----------------------|-----------------------|-----------------------|-----------------------|-----------------------|-------|-------|-------|-------|-------|-------|
| 47 | 20.6 | Included | 14.6 | 13.1 | 18.6 | 240746 | 0.00                  | 6.92·10 <sup>-2</sup> | 2.98·10 <sup>-1</sup> | 3.93·10 <sup>-2</sup> | 1.93·10 <sup>-2</sup> | 2.46·10 <sup>-4</sup> | 69.3% | 4.56% | 4.49% | 0.06% | 16.1% | 0.00% |
| 48 | 20.0 | Included | 14.2 | 12.8 | 18.0 | 227392 | 0.00                  | 6.88·10 <sup>-2</sup> | 2.98·10 <sup>-1</sup> | 3.90·10 <sup>-2</sup> | 1.92·10 <sup>-2</sup> | 3.09·10 <sup>-4</sup> | 69.1% | 4.53% | 4.45% | 0.07% | 16.0% | 0.00% |
| 49 | 19.5 | Included | 13.8 | 12.4 | 17.5 | 257592 | 0.00                  | 7.01·10 <sup>-2</sup> | 2.99·10 <sup>-1</sup> | 3.96·10 <sup>-2</sup> | 1.94·10 <sup>-2</sup> | 8.63·10 <sup>-5</sup> | 69.5% | 4.59% | 4.51% | 0.02% | 16.3% | 0.00% |
| 50 | 19.0 | Included | 13.4 | 12.0 | 17.0 | 229175 | 0.00                  | 7.04·10 <sup>-2</sup> | 3.05·10 <sup>-1</sup> | 4.05·10 <sup>-2</sup> | 1.98·10 <sup>-2</sup> | 1.78·10 <sup>-4</sup> | 70.9% | 4.70% | 4.59% | 0.04% | 16.3% | 0.00% |
| 51 | 18.5 | Included | 13.1 | 11.6 | 16.4 | 236139 | 0.00                  | 6.96·10 <sup>-2</sup> | 2.97·10 <sup>-1</sup> | 3.91·10 <sup>-2</sup> | 1.92·10 <sup>-2</sup> | 1.57·10 <sup>-4</sup> | 69.0% | 4.53% | 4.45% | 0.04% | 16.1% | 0.00% |
| 52 | 17.9 | Included | 12.7 | 11.3 | 15.9 | 252422 | 0.00                  | 7.05·10 <sup>-2</sup> | 3.01·10 <sup>-1</sup> | 3.98·10 <sup>-2</sup> | 1.95·10 <sup>-2</sup> | 3.08·10 <sup>-4</sup> | 69.8% | 4.62% | 4.53% | 0.07% | 16.4% | 0.00% |
| 53 | 17.4 | Included | 12.3 | 10.9 | 15.4 | 230908 | 0.00                  | 7.00·10 <sup>-2</sup> | 2.98·10 <sup>-1</sup> | 3.93·10 <sup>-2</sup> | 1.93·10 <sup>-2</sup> | 2.25·10 <sup>-4</sup> | 69.1% | 4.57% | 4.47% | 0.05% | 16.2% | 0.00% |
| 54 | 16.9 | Included | 11.9 | 10.5 | 14.9 | 231571 | 0.00                  | 6.88·10 <sup>-2</sup> | 2.96·10 <sup>-1</sup> | 3.96·10 <sup>-2</sup> | 1.94·10 <sup>-2</sup> | 1.44·10 <sup>-4</sup> | 68.8% | 4.59% | 4.50% | 0.03% | 16.0% | 0.00% |
| 55 | 16.3 | Included | 11.6 | 10.1 | 14.3 | 225298 | 0.00                  | 6.98·10 <sup>-2</sup> | 2.97·10 <sup>-1</sup> | 3.92·10 <sup>-2</sup> | 1.91·10 <sup>-2</sup> | 3.12·10 <sup>-4</sup> | 68.9% | 4.54% | 4.44% | 0.07% | 16.2% | 0.00% |
| 56 | 15.8 | Included | 11.2 | 9.8  | 13.8 | 242734 | 2.06·10 <sup>-5</sup> | 7.13·10 <sup>-2</sup> | 3.03·10 <sup>-1</sup> | 4.00·10 <sup>-2</sup> | 1.95·10 <sup>-2</sup> | 3.20·10 <sup>-4</sup> | 70.3% | 4.64% | 4.54% | 0.07% | 16.5% | 0.00% |
| 57 | 15.3 | Included | 10.8 | 9.4  | 13.3 | 240166 | 7.08·10 <sup>-5</sup> | 7.05·10 <sup>-2</sup> | 3.02·10 <sup>-1</sup> | 4.01·10 <sup>-2</sup> | 1.96·10 <sup>-2</sup> | 3.08·10 <sup>-4</sup> | 70.0% | 4.66% | 4.56% | 0.07% | 16.4% | 0.02% |
| 58 | 14.7 | Included | 10.4 | 9.0  | 12.7 | 238512 | 2.05·10 <sup>-4</sup> | 6.88·10 <sup>-2</sup> | 2.97·10 <sup>-1</sup> | 3.89·10 <sup>-2</sup> | 1.89·10 <sup>-2</sup> | 2.95·10 <sup>-4</sup> | 69.0% | 4.51% | 4.39% | 0.07% | 16.0% | 0.04% |
| 59 | 14.2 | Included | 10.1 | 8.6  | 12.2 | 243239 | 6.50·10 <sup>-4</sup> | 7.03·10 <sup>-2</sup> | 3.07·10 <sup>-1</sup> | 4.07·10 <sup>-2</sup> | 1.98·10 <sup>-2</sup> | 4.42·10 <sup>-4</sup> | 71.2% | 4.73% | 4.60% | 0.10% | 16.3% | 0.14% |
| 60 | 13.7 | Included | 9.7  | 8.3  | 11.7 | 231896 | 1.63·10 <sup>-3</sup> | 6.81·10 <sup>-2</sup> | 3.00·10 <sup>-1</sup> | 3.96·10 <sup>-2</sup> | 1.93·10 <sup>-2</sup> | 3.99·10 <sup>-4</sup> | 69.6% | 4.60% | 4.49% | 0.09% | 15.8% | 0.35% |
| 61 | 13.2 | Included | 9.3  | 7.9  | 11.1 | 221247 | 3.57·10 <sup>-3</sup> | 6.68·10 <sup>-2</sup> | 2.97·10 <sup>-1</sup> | 3.96·10 <sup>-2</sup> | 1.92·10 <sup>-2</sup> | 5.52·10 <sup>-4</sup> | 68.9% | 4.60% | 4.46% | 0.13% | 15.5% | 0.77% |
| 62 | 12.6 | Included | 8.9  | 7.5  | 10.6 | 282336 | 7.83·10 <sup>-3</sup> | 6.40·10 <sup>-2</sup> | 2.95·10 <sup>-1</sup> | 3.94·10 <sup>-2</sup> | 1.91·10 <sup>-2</sup> | 6.95·10 <sup>-4</sup> | 68.4% | 4.57% | 4.43% | 0.16% | 14.8% | 1.70% |
| 63 | 12.1 | Included | 8.6  | 7.1  | 10.1 | 246289 | 1.46·10 <sup>-2</sup> | 6.01·10 <sup>-2</sup> | 2.89·10 <sup>-1</sup> | 3.92·10 <sup>-2</sup> | 3.11·10 <sup>-2</sup> | 1.14·10 <sup>-3</sup> | 67.1% | 4.55% | 7.21% | 0.27% | 14.0% | 3.17% |
| 64 | 11.6 | Included | 8.2  | 6.8  | 9.5  | 239232 | 2.42                  | 5.66·10 <sup>-2</sup> | 2.83·10 <sup>-1</sup> | 3.92·10 <sup>-2</sup> | 1.88·10 <sup>-2</sup> | 1.63·10 <sup>-4</sup> | 65.6% | 4.55% | 4.36% | 0.38% | 13.1% | 5.25% |
| 65 | 11.0 | Included | 7.8  | 6.4  | 9.0  | 220087 | 3.66                  | 5.17·10 <sup>-2</sup> | 2.73·10 <sup>-1</sup> | 3.94·10 <sup>-2</sup> | 1.89·10 <sup>-2</sup> | 2.17·10 <sup>-4</sup> | 63.3% | 4.57% | 4.39% | 0.50% | 12.0% | 7.92% |
| 66 | 10.5 | Included | 7.4  | 6.0  | 8.5  | 228000 | 4.86                  | 4.71·10 <sup>-2</sup> | 2.66·10 <sup>-1</sup> | 3.99·10 <sup>-2</sup> | 1.91·10 <sup>-2</sup> | 2.65·10 <sup>-4</sup> | 61.7% | 4.63% | 4.42% | 0.61% | 10.9% | 10.5% |
| 67 | 10.0 | Included | 7.1  | 5.6  | 8.0  | 242781 | 7.05                  | 4.14·10 <sup>-2</sup> | 2.54·10 <sup>-1</sup> | 4.04·10 <sup>-2</sup> | 1.92·10 <sup>-2</sup> | 3.49·10 <sup>-4</sup> | 59.0% | 4.69% | 4.46% | 0.81% | 9.62% | 15.3% |
| 68 | 9.4  | Included | 6.7  | 5.3  | 7.4  | 282637 | 1.13·10 <sup>-1</sup> | 2.84·10 <sup>-2</sup> | 2.20·10 <sup>-1</sup> | 3.89·10 <sup>-2</sup> | 1.85·10 <sup>-2</sup> | 4.21·10 <sup>-4</sup> | 51.0% | 4.51% | 4.29% | 0.98% | 6.60% | 24.5% |
| 69 | 8.9  | Included | 6.3  | 4.9  | 6.9  | 266875 | 1.37                  | 2.38·10 <sup>-2</sup> | 2.09·10 <sup>-1</sup> | 3.90·10 <sup>-2</sup> | 1.85·10 <sup>-2</sup> | 6.31·10 <sup>-4</sup> | 48.4% | 4.53% | 4.28% | 1.47% | 5.52% | 29.7% |
| 70 | 8.4  | Included | 5.9  | 4.5  | 6.4  | 233358 | 1.62                  | 1.88·10 <sup>-2</sup> | 1.95·10 <sup>-1</sup> | 3.88·10 <sup>-2</sup> | 1.84·10 <sup>-2</sup> | 6.84·10 <sup>-4</sup> | 45.2% | 4.51% | 4.28% | 1.59% | 4.37% | 35.2% |
| 71 | 7.9  | Included | 5.6  | 4.1  | 5.8  | 319818 | 1.82                  | 1.57·10 <sup>-2</sup> | 1.85·10 <sup>-1</sup> | 4.00·10 <sup>-2</sup> | 1.90·10 <sup>-2</sup> | 5.35·10 <sup>-4</sup> | 43.0% | 4.64% | 4.40% | 1.24% | 3.65% | 39.5% |
| 72 | 7.3  | Included | 5.2  | 3.8  | 5.3  | 224186 | 2.03                  | 1.18·10 <sup>-2</sup> | 1.71·10 <sup>-1</sup> | 3.84·10 <sup>-2</sup> | 1.82·10 <sup>-2</sup> | 9.07·10 <sup>-4</sup> | 39.6% | 4.45% | 4.22% | 2.11% | 2.73% | 44.0% |
| 73 | 6.8  | Included | 4.8  | 3.4  | 4.8  | 280951 | 2.62                  | 6.34·10 <sup>-3</sup> | 1.38·10 <sup>-1</sup> | 3.70·10 <sup>-2</sup> | 1.76·10 <sup>-2</sup> | 6.10·10 <sup>-4</sup> | 32.0% | 4.30% | 4.08% | 1.42% | 1.47% | 56.9% |
| 74 | 6.3  | Included | 4.4  | 3.0  | 4.2  | 299063 | 3.03                  | 2.93·10 <sup>-3</sup> | 1.12·10 <sup>-1</sup> | 3.59·10 <sup>-2</sup> | 1.71·10 <sup>-2</sup> | 6.69·10 <sup>-4</sup> | 26.1% | 4.17% | 3.96% | 1.55% | 0.68% | 65.6% |
| 75 | 5.7  | Included | 4.1  | 2.6  | 3.7  | 277714 | 3.52                  | 1.26·10 <sup>-3</sup> | 8.36·10 <sup>-2</sup> | 3.16·10 <sup>-2</sup> | 1.52·10 <sup>-2</sup> | 7.01·10 <sup>-4</sup> | 19.4% | 3.67% | 3.52% | 1.63% | 0.29% | 76.2% |
| 76 | 5.2  | Included | 3.7  | 2.3  | 3.2  | 246315 | 3.83                  | 4.30·10 <sup>-4</sup> | 6.13·10 <sup>-2</sup> | 2.80·10 <sup>-2</sup> | 1.35·10 <sup>-2</sup> | 6.07·10 <sup>-4</sup> | 14.2% | 3.25% | 0.31% | 1.41% | 0.10% | 83.0% |

|    |     |          |     |     |     |        |      |                      |                      |                      |                      |                      |       |       |       |       |       |       |
|----|-----|----------|-----|-----|-----|--------|------|----------------------|----------------------|----------------------|----------------------|----------------------|-------|-------|-------|-------|-------|-------|
| 77 | 4.7 | Included | 3.3 | 1.9 | 2.7 | 257447 | 4.01 | $1.98 \cdot 10^{-4}$ | $4.93 \cdot 10^{-2}$ | $2.58 \cdot 10^{-2}$ | $1.25 \cdot 10^{-2}$ | $4.42 \cdot 10^{-4}$ | 11.4% | 3.00% | 2.90% | 1.03% | 0.05% | 86.9% |
| 78 | 4.1 | Included | 2.9 | 1.5 | 2.1 | 235113 | 4.16 | $6.81 \cdot 10^{-5}$ | $3.84 \cdot 10^{-2}$ | $2.32 \cdot 10^{-2}$ | $1.13 \cdot 10^{-2}$ | $4.22 \cdot 10^{-4}$ | 8.91% | 2.69% | 2.62% | 0.98% | 0.02% | 90.2% |
| 79 | 3.6 | Included | 2.6 | 1.1 | 1.6 | 267421 | 4.25 | $4.49 \cdot 10^{-5}$ | $2.92 \cdot 10^{-2}$ | $1.98 \cdot 10^{-2}$ | $9.71 \cdot 10^{-3}$ | $3.19 \cdot 10^{-4}$ | 6.78% | 2.30% | 2.25% | 0.74% | 0.01% | 92.1% |
| 80 | 3.1 | Included | 2.2 | 0.8 | 1.1 | 270800 | 4.44 | $6.28 \cdot 10^{-5}$ | $2.29 \cdot 10^{-2}$ | $1.78 \cdot 10^{-2}$ | $8.76 \cdot 10^{-3}$ | $2.65 \cdot 10^{-4}$ | 5.31% | 2.07% | 2.03% | 0.62% | 0.01% | 96.3% |
| 81 | 2.5 | Included | 1.8 | 0.4 | 0.5 | 247315 | 4.60 | $2.02 \cdot 10^{-5}$ | $1.65 \cdot 10^{-2}$ | $1.49 \cdot 10^{-2}$ | $7.33 \cdot 10^{-3}$ | $2.41 \cdot 10^{-4}$ | 3.84% | 1.73% | 1.70% | 0.56% | 0.00% | 99.7% |
| 82 | 2.0 | Included | 1.4 | 0.0 | 0.0 | 366489 | 4.62 | $3.00 \cdot 10^{-5}$ | $1.09 \cdot 10^{-2}$ | $1.15 \cdot 10^{-2}$ | $5.70 \cdot 10^{-3}$ | $1.13 \cdot 10^{-4}$ | 2.53% | 1.33% | 1.32% | 0.26% | 0.01% | 99.9% |
| 83 | 1.5 | Excluded | 1.1 | -   | -   | -      | -    | -                    | -                    | -                    | -                    | -                    | -     | -     | -     | -     | -     | -     |
| 84 | 1.0 | Excluded | 0.7 | -   | -   | -      | -    | -                    | -                    | -                    | -                    | -                    | -     | -     | -     | -     | -     | -     |
| 85 | 0.4 | Excluded | 0.3 | -   | -   | -      | -    | -                    | -                    | -                    | -                    | -                    | -     | -     | -     | -     | -     | -     |
| 86 | 0.0 | Excluded | 0.0 | -   | -   | -      | -    | -                    | -                    | -                    | -                    | -                    | -     | -     | -     | -     | -     | -     |

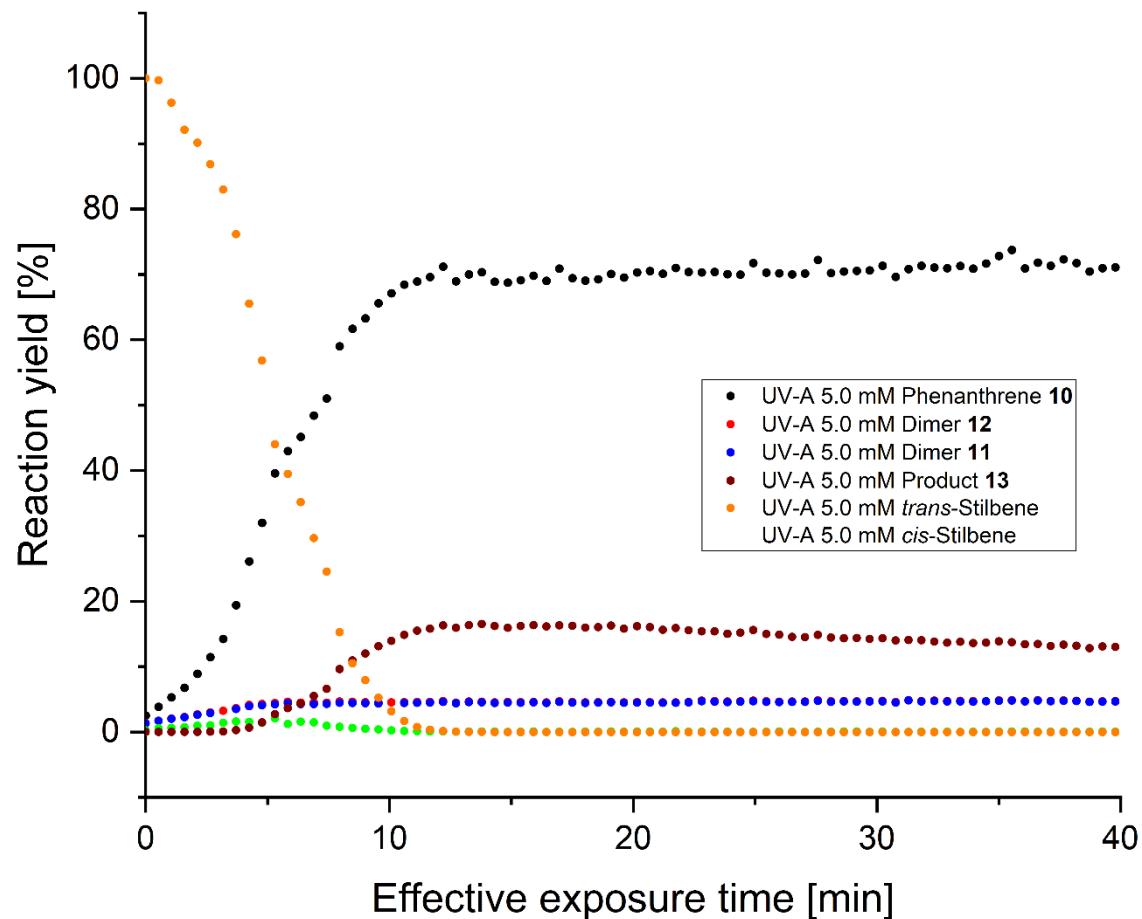

Figure S 18. Results of Switch-Off optimisation of Mallory photoreaction using UV-B light and 5.0 mM stilbene concentration. Top: Reaction components GC areas, conversion, and yield plotted against uncorrected residence time. Bottom: Reaction components GC areas, conversion, and yield plotted against exposure time, corrected for light inhomogeneity.

#### 2. 4. 2. 4. Switch-Off experiment results using UV-B light and 50.0 mM stilbene concentration

*Cis*-stilbene (445.0  $\mu$ L, 450.2 mg, 2.50 mmol, 1.0 eq., 50.0 mM solution), iodine (63.0 mg, 0.25 mmol, 0.1 eq., 5.0 mM solution), and dibutyl ether (1.5 mL, 1.17 g, 9.0 mmol, 3.6 eq., 180.0 mM solution) were dissolved in cyclohexane (48.0 mL, 106.6 vol.), obtained solution was saturated with oxygen by bubbling gaseous O<sub>2</sub> for 15 minutes, and then connected to flow reagents stream. Cyclohexane was connected to flow solvents stream. The UV-B lamp (Philips PL-L 36W/01/4P) and water cooling were then turned on and system was allowed to equilibrate for 30 minutes. Then reaction mixture was injected into the photoreactor (internal volume of 31.8 mL, 1.00 mm I.D., 1.60 mm O.D.,



PFA). Effective exposure time was set to 180 minutes (which corresponds to 0.177 mL/min flow rate). Once the photoreactor was filled with reaction mixture, the UV lamp was switched off, the pump was switched to solvent stream, the reaction mixture was eluted from the photoreactor, and was collected into vials (0.375 mL of reaction mixture, diluted to 1.0 mL with acetone). Collected samples were then analysed using off-line GC.

Table S 14. Results of Switch-Off optimisation performed for Mallory reaction of cis-stilbene using UV-B light and 50.0 mM stilbene concentration.

| #  | Residence time [min] | Included/Excluded | Reactor volume [mL] | Effective Reactor Volume [mL] | Effective exposure time [min] | IS GC Area | Area Ratio cis-Stilbene/IS | Area Ratio trans-Stilbene/IS | Area Ratio Phenanthrene 10/IS | Area Ratio Dimer ABAB 12/IS | Area Ratio Dimer AABB 11/IS | Area Ratio Product 13/IS | Phenanthrene yield [%] | Dimer 12 yield [%] | Dimer 11 yield [%] | Product 13 yield [%] | trans-Stilbene yield [%] | Remaining cis-Stilbene [%] |
|----|----------------------|-------------------|---------------------|-------------------------------|-------------------------------|------------|----------------------------|------------------------------|-------------------------------|-----------------------------|-----------------------------|--------------------------|------------------------|--------------------|--------------------|----------------------|--------------------------|----------------------------|
| 1  | 174.0                | Excluded          | 30.8                | -                             | -                             | -          | -                          | -                            | -                             | -                           | -                           | -                        | -                      | -                  | -                  | -                    | -                        | -                          |
| 2  | 171.9                | Excluded          | 30.4                | -                             | -                             | -          | -                          | -                            | -                             | -                           | -                           | -                        | -                      | -                  | -                  | -                    | -                        | -                          |
| 3  | 169.8                | Excluded          | 30.1                | -                             | -                             | -          | -                          | -                            | -                             | -                           | -                           | -                        | -                      | -                  | -                  | -                    | -                        | -                          |
| 4  | 167.7                | Excluded          | 29.7                | -                             | -                             | -          | -                          | -                            | -                             | -                           | -                           | -                        | -                      | -                  | -                  | -                    | -                        | -                          |
| 5  | 165.5                | Included          | 29.3                | 27.8                          | 156.8                         | 87536      | 0.00                       | 5.48·10 <sup>-2</sup>        | 3.00·10 <sup>-1</sup>         | 4.01·10 <sup>-2</sup>       | 1.88·10 <sup>-2</sup>       | 2.33·10 <sup>-2</sup>    | 69.6%                  | 4.65%              | 2.18%              | 3.18%                | 12.7%                    | 0.00%                      |
| 6  | 163.4                | Included          | 28.9                | 27.4                          | 154.7                         | 215570     | 4.64·10 <sup>-6</sup>      | 5.62·10 <sup>-2</sup>        | 3.06·10 <sup>-1</sup>         | 4.18·10 <sup>-2</sup>       | 1.95·10 <sup>-2</sup>       | 4.40·10 <sup>-3</sup>    | 71.0%                  | 4.85%              | 2.27%              | 0.60%                | 13.0%                    | 0.00%                      |
| 7  | 161.3                | Included          | 28.6                | 27.0                          | 152.5                         | 209302     | 1.43·10 <sup>-5</sup>      | 5.59·10 <sup>-2</sup>        | 3.04·10 <sup>-1</sup>         | 4.10·10 <sup>-2</sup>       | 1.92·10 <sup>-2</sup>       | 1.08·10 <sup>-2</sup>    | 70.7%                  | 4.76%              | 2.23%              | 1.48%                | 13.0%                    | 0.00%                      |
| 8  | 159.2                | Included          | 28.2                | 26.6                          | 150.4                         | 215947     | 1.39·10 <sup>-5</sup>      | 5.61·10 <sup>-2</sup>        | 3.04·10 <sup>-1</sup>         | 4.09·10 <sup>-2</sup>       | 1.91·10 <sup>-2</sup>       | 1.02·10 <sup>-2</sup>    | 70.6%                  | 4.75%              | 2.22%              | 1.39%                | 13.0%                    | 0.00%                      |
| 9  | 157.1                | Included          | 27.8                | 26.3                          | 148.3                         | 211077     | 3.32·10 <sup>-5</sup>      | 5.58·10 <sup>-2</sup>        | 3.02·10 <sup>-1</sup>         | 4.04·10 <sup>-2</sup>       | 1.89·10 <sup>-2</sup>       | 1.08·10 <sup>-2</sup>    | 70.1%                  | 4.68%              | 2.19%              | 1.47%                | 13.0%                    | 0.01%                      |
| 10 | 154.9                | Included          | 27.4                | 25.9                          | 146.2                         | 205224     | 2.44·10 <sup>-5</sup>      | 5.69·10 <sup>-2</sup>        | 3.07·10 <sup>-1</sup>         | 4.15·10 <sup>-2</sup>       | 1.94·10 <sup>-2</sup>       | 1.08·10 <sup>-2</sup>    | 71.3%                  | 4.81%              | 2.25%              | 1.47%                | 13.2%                    | 0.01%                      |
| 11 | 152.8                | Included          | 27.1                | 25.5                          | 144.1                         | 211052     | 2.37·10 <sup>-5</sup>      | 5.77·10 <sup>-2</sup>        | 3.10·10 <sup>-1</sup>         | 4.21·10 <sup>-2</sup>       | 1.97·10 <sup>-2</sup>       | 1.06·10 <sup>-2</sup>    | 71.9%                  | 4.88%              | 2.28%              | 1.45%                | 13.4%                    | 0.00%                      |
| 12 | 150.7                | Included          | 26.7                | 25.1                          | 141.9                         | 209613     | 2.39·10 <sup>-5</sup>      | 5.71·10 <sup>-2</sup>        | 3.06·10 <sup>-1</sup>         | 4.12·10 <sup>-2</sup>       | 1.93·10 <sup>-2</sup>       | 1.11·10 <sup>-2</sup>    | 70.9%                  | 4.78%              | 2.24%              | 1.52%                | 13.3%                    | 0.00%                      |
| 13 | 148.6                | Included          | 26.3                | 24.8                          | 139.8                         | 284324     | 2.81·10 <sup>-5</sup>      | 5.79·10 <sup>-2</sup>        | 3.08·10 <sup>-1</sup>         | 4.21·10 <sup>-2</sup>       | 1.97·10 <sup>-2</sup>       | 8.28·10 <sup>-2</sup>    | 71.5%                  | 4.89%              | 2.29%              | 1.13%                | 13.4%                    | 0.01%                      |
| 14 | 146.5                | Included          | 25.9                | 24.4                          | 137.7                         | 213074     | 1.88·10 <sup>-5</sup>      | 5.73·10 <sup>-2</sup>        | 3.04·10 <sup>-1</sup>         | 4.09·10 <sup>-2</sup>       | 1.92·10 <sup>-2</sup>       | 1.51·10 <sup>-2</sup>    | 70.5%                  | 4.74%              | 2.22%              | 2.05%                | 13.3%                    | 0.00%                      |
| 15 | 144.4                | Included          | 25.6                | 24.0                          | 135.6                         | 202303     | 3.95·10 <sup>-5</sup>      | 6.01·10 <sup>-2</sup>        | 3.16·10 <sup>-1</sup>         | 4.25·10 <sup>-2</sup>       | 1.97·10 <sup>-2</sup>       | 1.19·10 <sup>-2</sup>    | 73.3%                  | 4.93%              | 2.28%              | 1.62%                | 14.0%                    | 0.01%                      |
| 16 | 142.2                | Included          | 25.2                | 23.6                          | 133.5                         | 227340     | 3.52·10 <sup>-5</sup>      | 5.97·10 <sup>-2</sup>        | 3.12·10 <sup>-1</sup>         | 4.21·10 <sup>-2</sup>       | 1.96·10 <sup>-2</sup>       | 1.04·10 <sup>-2</sup>    | 72.5%                  | 4.89%              | 2.28%              | 1.42%                | 13.9%                    | 0.01%                      |
| 17 | 140.1                | Included          | 24.8                | 23.3                          | 131.4                         | 212058     | 3.77·10 <sup>-5</sup>      | 5.89·10 <sup>-2</sup>        | 3.07·10 <sup>-1</sup>         | 4.15·10 <sup>-2</sup>       | 1.94·10 <sup>-2</sup>       | 1.27·10 <sup>-2</sup>    | 71.3%                  | 4.82%              | 2.25%              | 1.73%                | 13.7%                    | 0.01%                      |
| 18 | 138.0                | Included          | 24.4                | 22.9                          | 129.2                         | 205409     | 2.92·10 <sup>-5</sup>      | 5.85·10 <sup>-2</sup>        | 3.04·10 <sup>-1</sup>         | 4.11·10 <sup>-2</sup>       | 1.92·10 <sup>-2</sup>       | 1.21·10 <sup>-2</sup>    | 70.5%                  | 4.77%              | 2.23%              | 1.65%                | 13.6%                    | 0.01%                      |
| 19 | 135.9                | Included          | 24.1                | 22.5                          | 127.1                         | 211439     | 2.84·10 <sup>-5</sup>      | 5.90·10 <sup>-2</sup>        | 3.06·10 <sup>-1</sup>         | 4.13·10 <sup>-2</sup>       | 1.93·10 <sup>-2</sup>       | 1.15·10 <sup>-2</sup>    | 70.9%                  | 4.79%              | 2.24%              | 1.56%                | 13.7%                    | 0.01%                      |
| 20 | 133.8                | Included          | 23.7                | 22.1                          | 125.0                         | 255518     | 4.30·10 <sup>-5</sup>      | 5.92·10 <sup>-2</sup>        | 3.04·10 <sup>-1</sup>         | 4.13·10 <sup>-2</sup>       | 1.93·10 <sup>-2</sup>       | 1.01·10 <sup>-2</sup>    | 70.6%                  | 4.80%              | 2.24%              | 1.38%                | 13.7%                    | 0.01%                      |
| 21 | 131.6                | Included          | 23.3                | 21.8                          | 122.9                         | 224739     | 4.00·10 <sup>-5</sup>      | 5.94·10 <sup>-2</sup>        | 3.05·10 <sup>-1</sup>         | 4.17·10 <sup>-2</sup>       | 1.95·10 <sup>-2</sup>       | 1.34·10 <sup>-2</sup>    | 70.7%                  | 4.84%              | 2.26%              | 1.83%                | 13.8%                    | 0.01%                      |

|    |       |          |      |      |       |        |                       |                       |                       |                       |                       |                       |       |       |       |       |       |       |
|----|-------|----------|------|------|-------|--------|-----------------------|-----------------------|-----------------------|-----------------------|-----------------------|-----------------------|-------|-------|-------|-------|-------|-------|
| 22 | 129.5 | Included | 22.9 | 21.4 | 120.8 | 179956 | 2.22·10 <sup>-5</sup> | 5.98·10 <sup>-2</sup> | 3.05·10 <sup>-1</sup> | 4.13·10 <sup>-2</sup> | 1.93·10 <sup>-2</sup> | 1.50·10 <sup>-2</sup> | 70.9% | 4.79% | 2.24% | 2.04% | 13.9% | 0.00% |
| 23 | 127.4 | Included | 22.6 | 21.0 | 118.6 | 326953 | 4.28·10 <sup>-5</sup> | 6.01·10 <sup>-2</sup> | 3.04·10 <sup>-1</sup> | 4.25·10 <sup>-2</sup> | 1.99·10 <sup>-2</sup> | 6.88·10 <sup>-3</sup> | 70.4% | 4.94% | 2.31% | 0.94% | 14.0% | 0.01% |
| 24 | 125.3 | Included | 22.2 | 20.6 | 116.5 | 185934 | 3.76·10 <sup>-5</sup> | 5.98·10 <sup>-2</sup> | 2.99·10 <sup>-1</sup> | 3.99·10 <sup>-2</sup> | 1.86·10 <sup>-2</sup> | 2.20·10 <sup>-2</sup> | 69.3% | 4.63% | 2.16% | 3.00% | 13.9% | 0.01% |
| 25 | 123.2 | Included | 21.8 | 20.3 | 114.4 | 208392 | 4.32·10 <sup>-5</sup> | 6.16·10 <sup>-2</sup> | 3.06·10 <sup>-1</sup> | 4.14·10 <sup>-2</sup> | 1.93·10 <sup>-2</sup> | 1.10·10 <sup>-2</sup> | 71.0% | 4.80% | 2.24% | 1.50% | 14.3% | 0.01% |
| 26 | 121.0 | Included | 21.4 | 19.9 | 112.3 | 212004 | 2.36·10 <sup>-5</sup> | 6.13·10 <sup>-2</sup> | 3.03·10 <sup>-1</sup> | 4.12·10 <sup>-2</sup> | 1.91·10 <sup>-2</sup> | 1.27·10 <sup>-2</sup> | 70.3% | 4.78% | 2.22% | 1.73% | 14.2% | 0.00% |
| 27 | 118.9 | Included | 21.1 | 19.5 | 110.2 | 216437 | 2.31·10 <sup>-5</sup> | 6.14·10 <sup>-2</sup> | 3.02·10 <sup>-1</sup> | 4.09·10 <sup>-2</sup> | 1.91·10 <sup>-2</sup> | 1.26·10 <sup>-2</sup> | 70.2% | 4.74% | 2.21% | 1.72% | 14.3% | 0.00% |
| 28 | 116.8 | Included | 20.7 | 19.1 | 108.1 | 217317 | 3.22·10 <sup>-5</sup> | 6.18·10 <sup>-2</sup> | 3.02·10 <sup>-1</sup> | 4.13·10 <sup>-2</sup> | 1.92·10 <sup>-2</sup> | 1.31·10 <sup>-2</sup> | 70.1% | 4.80% | 2.23% | 1.79% | 14.3% | 0.01% |
| 29 | 114.7 | Included | 20.3 | 18.8 | 105.9 | 222326 | 3.15·10 <sup>-5</sup> | 6.17·10 <sup>-2</sup> | 3.01·10 <sup>-1</sup> | 4.09·10 <sup>-2</sup> | 1.91·10 <sup>-2</sup> | 1.33·10 <sup>-2</sup> | 69.8% | 4.75% | 2.22% | 1.81% | 14.3% | 0.01% |
| 30 | 112.6 | Included | 19.9 | 18.4 | 103.8 | 238276 | 4.20·10 <sup>-5</sup> | 6.40·10 <sup>-2</sup> | 3.09·10 <sup>-1</sup> | 4.23·10 <sup>-2</sup> | 2.04·10 <sup>-2</sup> | 1.28·10 <sup>-2</sup> | 71.8% | 4.91% | 2.37% | 1.75% | 14.9% | 0.01% |
| 31 | 110.5 | Included | 19.6 | 18.0 | 101.7 | 244990 | 4.08·10 <sup>-5</sup> | 6.27·10 <sup>-2</sup> | 3.01·10 <sup>-1</sup> | 4.08·10 <sup>-2</sup> | 1.90·10 <sup>-2</sup> | 1.41·10 <sup>-2</sup> | 69.8% | 4.73% | 2.20% | 1.92% | 14.5% | 0.01% |
| 32 | 108.3 | Included | 19.2 | 17.6 | 99.6  | 226005 | 3.98·10 <sup>-5</sup> | 6.31·10 <sup>-2</sup> | 3.00·10 <sup>-1</sup> | 4.07·10 <sup>-2</sup> | 1.89·10 <sup>-2</sup> | 1.54·10 <sup>-2</sup> | 69.7% | 4.72% | 2.20% | 2.10% | 14.6% | 0.01% |
| 33 | 106.2 | Included | 18.8 | 17.3 | 97.5  | 224658 | 3.12·10 <sup>-5</sup> | 6.37·10 <sup>-2</sup> | 3.01·10 <sup>-1</sup> | 4.05·10 <sup>-2</sup> | 1.88·10 <sup>-2</sup> | 1.44·10 <sup>-2</sup> | 69.8% | 4.70% | 2.18% | 1.97% | 14.8% | 0.01% |
| 34 | 104.1 | Included | 18.4 | 16.9 | 95.3  | 245450 | 4.07·10 <sup>-5</sup> | 6.45·10 <sup>-2</sup> | 3.01·10 <sup>-1</sup> | 4.08·10 <sup>-2</sup> | 1.90·10 <sup>-2</sup> | 1.33·10 <sup>-2</sup> | 69.9% | 4.73% | 2.20% | 1.81% | 15.0% | 0.01% |
| 35 | 102.0 | Included | 18.1 | 16.5 | 93.2  | 228351 | 3.07·10 <sup>-5</sup> | 6.63·10 <sup>-2</sup> | 3.07·10 <sup>-1</sup> | 4.18·10 <sup>-2</sup> | 1.95·10 <sup>-2</sup> | 1.55·10 <sup>-2</sup> | 71.3% | 4.85% | 2.26% | 2.12% | 15.4% | 0.01% |
| 36 | 99.9  | Included | 17.7 | 16.1 | 91.1  | 226575 | 2.21·10 <sup>-5</sup> | 6.54·10 <sup>-2</sup> | 3.00·10 <sup>-1</sup> | 4.10·10 <sup>-2</sup> | 1.91·10 <sup>-2</sup> | 1.48·10 <sup>-2</sup> | 69.6% | 4.76% | 2.22% | 2.01% | 15.2% | 0.00% |
| 37 | 97.7  | Included | 17.3 | 15.8 | 89.0  | 231280 | 4.32·10 <sup>-5</sup> | 6.58·10 <sup>-2</sup> | 3.00·10 <sup>-1</sup> | 4.08·10 <sup>-2</sup> | 1.89·10 <sup>-2</sup> | 1.41·10 <sup>-2</sup> | 69.7% | 4.74% | 2.20% | 1.92% | 15.3% | 0.01% |
| 38 | 95.6  | Included | 16.9 | 15.4 | 86.9  | 265778 | 4.14·10 <sup>-5</sup> | 6.61·10 <sup>-2</sup> | 3.02·10 <sup>-1</sup> | 4.12·10 <sup>-2</sup> | 1.92·10 <sup>-2</sup> | 1.26·10 <sup>-2</sup> | 70.1% | 4.79% | 2.23% | 1.72% | 15.3% | 0.01% |
| 39 | 93.5  | Included | 16.6 | 15.0 | 84.7  | 282347 | 4.25·10 <sup>-5</sup> | 6.60·10 <sup>-2</sup> | 3.01·10 <sup>-1</sup> | 4.18·10 <sup>-2</sup> | 1.95·10 <sup>-2</sup> | 1.40·10 <sup>-2</sup> | 70.0% | 4.86% | 2.26% | 1.90% | 15.3% | 0.01% |
| 40 | 91.4  | Included | 16.2 | 14.6 | 82.6  | 230054 | 4.78·10 <sup>-5</sup> | 6.65·10 <sup>-2</sup> | 3.02·10 <sup>-1</sup> | 4.02·10 <sup>-2</sup> | 1.87·10 <sup>-2</sup> | 1.81·10 <sup>-2</sup> | 70.0% | 4.66% | 2.16% | 2.47% | 15.4% | 0.01% |
| 41 | 89.3  | Included | 15.8 | 14.3 | 80.5  | 207830 | 3.37·10 <sup>-5</sup> | 6.78·10 <sup>-2</sup> | 3.04·10 <sup>-1</sup> | 3.97·10 <sup>-2</sup> | 1.84·10 <sup>-2</sup> | 1.64·10 <sup>-2</sup> | 70.6% | 4.60% | 2.14% | 2.24% | 15.7% | 0.01% |
| 42 | 87.1  | Included | 15.4 | 13.9 | 78.4  | 231287 | 3.46·10 <sup>-5</sup> | 6.76·10 <sup>-2</sup> | 3.01·10 <sup>-1</sup> | 3.96·10 <sup>-2</sup> | 1.85·10 <sup>-2</sup> | 1.39·10 <sup>-2</sup> | 69.8% | 4.59% | 2.14% | 1.90% | 15.7% | 0.01% |
| 43 | 85.0  | Included | 15.1 | 13.5 | 76.3  | 279235 | 4.30·10 <sup>-5</sup> | 6.87·10 <sup>-2</sup> | 3.02·10 <sup>-1</sup> | 4.01·10 <sup>-2</sup> | 1.86·10 <sup>-2</sup> | 1.27·10 <sup>-2</sup> | 70.2% | 4.65% | 2.16% | 1.74% | 15.9% | 0.01% |
| 44 | 82.9  | Included | 14.7 | 13.1 | 74.2  | 226204 | 3.98·10 <sup>-5</sup> | 6.87·10 <sup>-2</sup> | 3.01·10 <sup>-1</sup> | 4.00·10 <sup>-2</sup> | 1.86·10 <sup>-2</sup> | 1.92·10 <sup>-2</sup> | 69.9% | 4.64% | 2.16% | 2.61% | 15.9% | 0.01% |
| 45 | 80.8  | Included | 14.3 | 12.8 | 72.0  | 227278 | 5.28·10 <sup>-5</sup> | 6.87·10 <sup>-2</sup> | 2.98·10 <sup>-1</sup> | 3.97·10 <sup>-2</sup> | 1.84·10 <sup>-2</sup> | 1.58·10 <sup>-2</sup> | 69.2% | 4.61% | 2.14% | 2.15% | 15.9% | 0.01% |
| 46 | 78.7  | Included | 13.9 | 12.4 | 69.9  | 246016 | 5.28·10 <sup>-5</sup> | 6.94·10 <sup>-2</sup> | 3.00·10 <sup>-1</sup> | 4.02·10 <sup>-2</sup> | 1.87·10 <sup>-2</sup> | 1.47·10 <sup>-2</sup> | 69.7% | 4.67% | 2.17% | 2.00% | 16.1% | 0.01% |
| 47 | 76.6  | Included | 13.6 | 12.0 | 67.8  | 241549 | 6.62·10 <sup>-5</sup> | 6.89·10 <sup>-2</sup> | 2.97·10 <sup>-1</sup> | 3.99·10 <sup>-2</sup> | 1.85·10 <sup>-2</sup> | 1.64·10 <sup>-2</sup> | 68.9% | 4.63% | 2.15% | 2.24% | 16.0% | 0.01% |
| 48 | 74.4  | Included | 13.2 | 11.6 | 65.7  | 228163 | 4.38·10 <sup>-5</sup> | 6.87·10 <sup>-2</sup> | 2.96·10 <sup>-1</sup> | 3.96·10 <sup>-2</sup> | 1.84·10 <sup>-2</sup> | 1.71·10 <sup>-2</sup> | 68.7% | 4.60% | 2.13% | 2.32% | 16.0% | 0.01% |
| 49 | 72.3  | Included | 12.8 | 11.3 | 63.6  | 258473 | 5.03·10 <sup>-5</sup> | 6.93·10 <sup>-2</sup> | 2.98·10 <sup>-1</sup> | 4.02·10 <sup>-2</sup> | 1.86·10 <sup>-2</sup> | 1.46·10 <sup>-2</sup> | 69.1% | 4.67% | 2.16% | 1.99% | 16.1% | 0.01% |
| 50 | 70.2  | Included | 12.4 | 10.9 | 61.4  | 229954 | 6.52·10 <sup>-5</sup> | 7.10·10 <sup>-2</sup> | 3.04·10 <sup>-1</sup> | 4.11·10 <sup>-2</sup> | 1.89·10 <sup>-2</sup> | 1.85·10 <sup>-2</sup> | 70.5% | 4.77% | 2.20% | 2.53% | 16.5% | 0.01% |
| 51 | 68.1  | Included | 12.1 | 10.5 | 59.3  | 236963 | 3.38·10 <sup>-5</sup> | 6.90·10 <sup>-2</sup> | 2.96·10 <sup>-1</sup> | 3.97·10 <sup>-2</sup> | 1.84·10 <sup>-2</sup> | 1.64·10 <sup>-2</sup> | 68.7% | 4.61% | 2.14% | 2.23% | 16.0% | 0.01% |

|    |      |          |      |      |      |        |                       |                       |                       |                       |                       |                       |       |       |       |       |       |       |
|----|------|----------|------|------|------|--------|-----------------------|-----------------------|-----------------------|-----------------------|-----------------------|-----------------------|-------|-------|-------|-------|-------|-------|
| 52 | 66.0 | Included | 11.7 | 10.1 | 57.2 | 253319 | 4.74·10 <sup>-5</sup> | 7.00·10 <sup>-2</sup> | 2.99·10 <sup>-1</sup> | 4.05·10 <sup>-2</sup> | 1.87·10 <sup>-2</sup> | 1.60·10 <sup>-2</sup> | 69.4% | 4.70% | 2.17% | 2.17% | 16.2% | 0.01% |
| 53 | 63.8 | Included | 11.3 | 9.8  | 55.1 | 231719 | 4.75·10 <sup>-5</sup> | 6.95·10 <sup>-2</sup> | 2.96·10 <sup>-1</sup> | 4.00·10 <sup>-2</sup> | 1.85·10 <sup>-2</sup> | 1.86·10 <sup>-2</sup> | 68.8% | 4.64% | 2.15% | 2.54% | 16.1% | 0.01% |
| 54 | 61.7 | Included | 10.9 | 9.4  | 53.0 | 232313 | 6.89·10 <sup>-5</sup> | 6.93·10 <sup>-2</sup> | 2.95·10 <sup>-1</sup> | 4.02·10 <sup>-2</sup> | 1.86·10 <sup>-2</sup> | 1.74·10 <sup>-2</sup> | 68.4% | 4.67% | 2.16% | 2.37% | 16.1% | 0.01% |
| 55 | 59.6 | Included | 10.6 | 9.0  | 50.8 | 226058 | 5.75·10 <sup>-5</sup> | 6.94·10 <sup>-2</sup> | 2.95·10 <sup>-1</sup> | 3.97·10 <sup>-2</sup> | 1.84·10 <sup>-2</sup> | 1.84·10 <sup>-2</sup> | 68.6% | 4.61% | 2.13% | 2.51% | 16.1% | 0.01% |
| 56 | 57.5 | Included | 10.2 | 8.6  | 48.7 | 243604 | 9.44·10 <sup>-5</sup> | 7.08·10 <sup>-2</sup> | 3.01·10 <sup>-1</sup> | 4.07·10 <sup>-2</sup> | 1.88·10 <sup>-2</sup> | 1.65·10 <sup>-2</sup> | 70.0% | 4.72% | 2.18% | 2.25% | 16.4% | 0.02% |
| 57 | 55.4 | Included | 9.8  | 8.3  | 46.6 | 240998 | 1.54·10 <sup>-4</sup> | 7.04·10 <sup>-2</sup> | 3.00·10 <sup>-1</sup> | 4.09·10 <sup>-2</sup> | 1.89·10 <sup>-2</sup> | 1.86·10 <sup>-2</sup> | 69.6% | 4.75% | 2.19% | 2.54% | 16.3% | 0.03% |
| 58 | 53.2 | Included | 9.4  | 7.9  | 44.5 | 239311 | 3.13·10 <sup>-4</sup> | 6.89·10 <sup>-2</sup> | 2.96·10 <sup>-1</sup> | 3.19·10 <sup>-2</sup> | 1.83·10 <sup>-2</sup> | 1.86·10 <sup>-2</sup> | 68.6% | 3.71% | 2.12% | 2.53% | 16.0% | 0.07% |
| 59 | 51.1 | Included | 9.1  | 7.5  | 42.4 | 244122 | 7.86·10 <sup>-4</sup> | 7.02·10 <sup>-2</sup> | 3.05·10 <sup>-1</sup> | 4.13·10 <sup>-2</sup> | 1.91·10 <sup>-2</sup> | 1.80·10 <sup>-2</sup> | 70.8% | 4.80% | 2.22% | 2.45% | 16.3% | 0.16% |
| 60 | 49.0 | Included | 8.7  | 7.1  | 40.3 | 237214 | 1.79·10 <sup>-3</sup> | 6.63·10 <sup>-2</sup> | 2.93·10 <sup>-1</sup> | 3.94·10 <sup>-2</sup> | 1.83·10 <sup>-2</sup> | 1.97·10 <sup>-2</sup> | 67.9% | 4.58% | 2.12% | 2.68% | 15.4% | 0.37% |
| 61 | 46.9 | Included | 8.3  | 6.8  | 38.1 | 222033 | 3.84·10 <sup>-3</sup> | 6.51·10 <sup>-2</sup> | 2.95·10 <sup>-1</sup> | 4.01·10 <sup>-2</sup> | 1.86·10 <sup>-2</sup> | 1.99·10 <sup>-2</sup> | 68.6% | 4.66% | 2.15% | 2.71% | 15.1% | 0.80% |
| 62 | 44.8 | Included | 7.9  | 6.4  | 36.0 | 283267 | 8.12·10 <sup>-3</sup> | 6.29·10 <sup>-2</sup> | 2.93·10 <sup>-1</sup> | 3.98·10 <sup>-2</sup> | 1.84·10 <sup>-2</sup> | 1.50·10 <sup>-2</sup> | 68.1% | 4.62% | 2.14% | 2.05% | 14.6% | 1.70% |
| 63 | 42.7 | Included | 7.6  | 6.0  | 33.9 | 247047 | 1.48·10 <sup>-2</sup> | 5.89·10 <sup>-2</sup> | 2.88·10 <sup>-1</sup> | 3.96·10 <sup>-2</sup> | 1.83·10 <sup>-2</sup> | 2.15·10 <sup>-2</sup> | 66.8% | 4.59% | 2.13% | 2.92% | 13.7% | 3.10% |
| 64 | 40.5 | Included | 7.2  | 5.6  | 31.8 | 240042 | 2.44·10 <sup>-2</sup> | 5.40·10 <sup>-2</sup> | 2.81·10 <sup>-1</sup> | 3.94·10 <sup>-2</sup> | 1.83·10 <sup>-2</sup> | 1.93·10 <sup>-2</sup> | 65.2% | 4.58% | 2.12% | 2.63% | 12.5% | 5.10% |
| 65 | 38.4 | Included | 6.8  | 5.3  | 29.7 | 220839 | 3.67·10 <sup>-2</sup> | 4.78·10 <sup>-2</sup> | 2.71·10 <sup>-1</sup> | 3.96·10 <sup>-2</sup> | 1.83·10 <sup>-2</sup> | 1.97·10 <sup>-2</sup> | 62.9% | 4.60% | 2.12% | 2.68% | 11.1% | 7.68% |
| 66 | 36.3 | Included | 6.4  | 4.9  | 27.5 | 228822 | 4.87·10 <sup>-2</sup> | 4.16·10 <sup>-2</sup> | 2.64·10 <sup>-1</sup> | 4.00·10 <sup>-2</sup> | 1.85·10 <sup>-2</sup> | 1.72·10 <sup>-2</sup> | 61.3% | 4.64% | 2.15% | 2.34% | 9.66% | 10.2% |
| 67 | 34.2 | Included | 6.1  | 4.5  | 25.4 | 243644 | 7.05·10 <sup>-2</sup> | 3.52·10 <sup>-2</sup> | 2.53·10 <sup>-1</sup> | 4.03·10 <sup>-2</sup> | 1.87·10 <sup>-2</sup> | 1.61·10 <sup>-2</sup> | 58.7% | 4.67% | 2.16% | 2.20% | 8.16% | 14.8% |
| 68 | 32.1 | Included | 5.7  | 4.1  | 23.3 | 283566 | 1.13·10 <sup>-1</sup> | 2.02·10 <sup>-2</sup> | 2.19·10 <sup>-1</sup> | 3.87·10 <sup>-2</sup> | 1.80·10 <sup>-2</sup> | 1.39·10 <sup>-2</sup> | 50.8% | 4.49% | 2.09% | 1.89% | 4.69% | 23.7% |
| 69 | 29.9 | Included | 5.3  | 3.8  | 21.2 | 267764 | 1.37·10 <sup>-1</sup> | 1.59·10 <sup>-2</sup> | 2.08·10 <sup>-1</sup> | 3.86·10 <sup>-2</sup> | 1.80·10 <sup>-2</sup> | 1.33·10 <sup>-2</sup> | 48.2% | 4.48% | 2.09% | 1.81% | 3.68% | 28.6% |
| 70 | 27.8 | Included | 4.9  | 3.4  | 19.1 | 234160 | 1.62·10 <sup>-1</sup> | 1.20·10 <sup>-2</sup> | 1.93·10 <sup>-1</sup> | 3.84·10 <sup>-2</sup> | 1.79·10 <sup>-2</sup> | 1.31·10 <sup>-2</sup> | 44.9% | 4.46% | 2.08% | 1.78% | 2.79% | 34.0% |
| 71 | 25.7 | Included | 4.6  | 3.0  | 16.9 | 320922 | 1.82·10 <sup>-1</sup> | 1.64·10 <sup>-2</sup> | 1.84·10 <sup>-1</sup> | 3.97·10 <sup>-2</sup> | 1.85·10 <sup>-2</sup> | 7.50·10 <sup>-3</sup> | 42.7% | 4.60% | 2.14% | 1.02% | 3.80% | 38.1% |
| 72 | 23.6 | Included | 4.2  | 2.6  | 14.8 | 224904 | 2.03·10 <sup>-1</sup> | 6.14·10 <sup>-3</sup> | 1.70·10 <sup>-1</sup> | 3.79·10 <sup>-2</sup> | 1.77·10 <sup>-2</sup> | 1.24·10 <sup>-2</sup> | 39.4% | 4.40% | 2.06% | 1.69% | 1.42% | 42.5% |
| 73 | 21.5 | Included | 3.8  | 2.3  | 12.7 | 281904 | 2.62·10 <sup>-1</sup> | 3.18·10 <sup>-3</sup> | 1.37·10 <sup>-1</sup> | 3.67·10 <sup>-2</sup> | 1.72·10 <sup>-2</sup> | 6.37·10 <sup>-3</sup> | 31.8% | 4.25% | 2.00% | 0.87% | 0.74% | 54.8% |
| 74 | 19.4 | Included | 3.4  | 1.9  | 10.6 | 299973 | 3.02·10 <sup>-1</sup> | 1.20·10 <sup>-3</sup> | 1.12·10 <sup>-1</sup> | 3.55·10 <sup>-2</sup> | 1.68·10 <sup>-2</sup> | 4.46·10 <sup>-3</sup> | 25.9% | 4.13% | 1.95% | 0.61% | 0.28% | 63.3% |
| 75 | 17.2 | Included | 3.1  | 1.5  | 8.5  | 278622 | 3.51·10 <sup>-1</sup> | 4.74·10 <sup>-4</sup> | 8.30·10 <sup>-2</sup> | 3.13·10 <sup>-2</sup> | 1.50·10 <sup>-2</sup> | 2.78·10 <sup>-3</sup> | 19.3% | 3.64% | 1.74% | 0.38% | 0.11% | 73.4% |
| 76 | 15.1 | Included | 2.7  | 1.1  | 6.4  | 247173 | 3.83·10 <sup>-1</sup> | 1.74·10 <sup>-4</sup> | 6.08·10 <sup>-2</sup> | 2.77·10 <sup>-2</sup> | 1.33·10 <sup>-2</sup> | 1.32·10 <sup>-3</sup> | 14.1% | 3.22% | 1.55% | 0.18% | 0.04% | 80.1% |
| 77 | 13.0 | Included | 2.3  | 0.8  | 4.2  | 258338 | 4.00·10 <sup>-1</sup> | 0.00                  | 4.89·10 <sup>-2</sup> | 2.56·10 <sup>-2</sup> | 1.23·10 <sup>-2</sup> | 5.45·10 <sup>-4</sup> | 11.4% | 2.97% | 1.43% | 0.07% | 0.00% | 83.8% |
| 78 | 10.9 | Included | 1.9  | 0.4  | 2.1  | 235992 | 4.15·10 <sup>-1</sup> | 3.81·10 <sup>-5</sup> | 3.80·10 <sup>-2</sup> | 2.29·10 <sup>-2</sup> | 1.11·10 <sup>-2</sup> | 4.24·10 <sup>-4</sup> | 8.83% | 2.66% | 1.29% | 0.06% | 0.01% | 86.9% |
| 79 | 8.8  | Included | 1.6  | 0.0  | 0.0  | 268291 | 4.25·10 <sup>-1</sup> | 2.61·10 <sup>-5</sup> | 2.89·10 <sup>-2</sup> | 1.96·10 <sup>-2</sup> | 9.57·10 <sup>-3</sup> | 2.07·10 <sup>-4</sup> | 6.70% | 2.28% | 1.11% | 0.03% | 0.01% | 88.9% |
| 80 | 6.6  | Excluded | 1.2  | -    | -    | -      | -                     | -                     | -                     | -                     | -                     | -                     | -     | -     | -     | -     | -     | -     |
| 81 | 4.5  | Excluded | 0.8  | -    | -    | -      | -                     | -                     | -                     | -                     | -                     | -                     | -     | -     | -     | -     | -     | -     |

|    |     |          |     |   |   |   |   |   |   |   |   |   |   |   |   |   |   |   |
|----|-----|----------|-----|---|---|---|---|---|---|---|---|---|---|---|---|---|---|---|
| 82 | 2.4 | Excluded | 0.4 | - | - | - | - | - | - | - | - | - | - | - | - | - | - | - |
| 83 | 0.3 | Excluded | 0.1 | - | - | - | - | - | - | - | - | - | - | - | - | - | - | - |

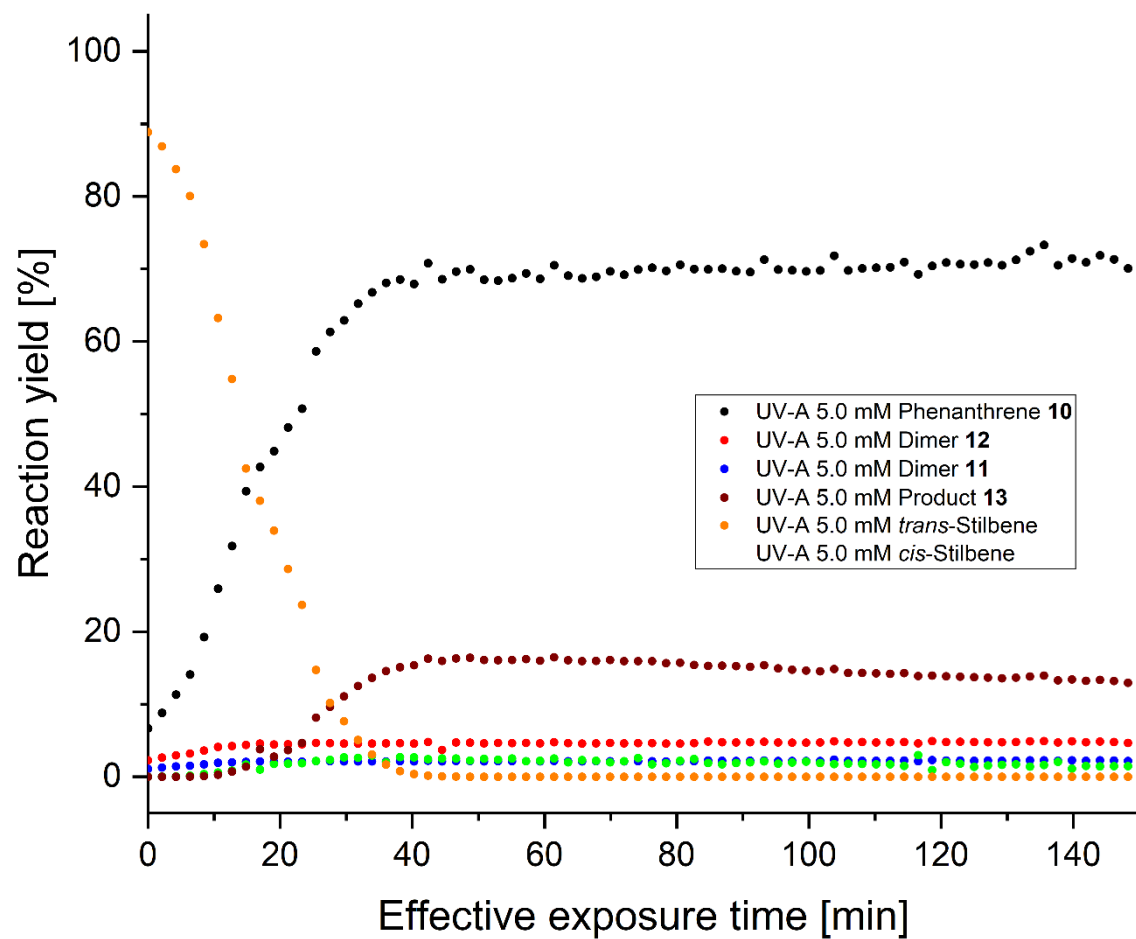

Figure S 19. Results of Switch-Off optimisation of Mallory photoreaction using UV-B light and 50.0 mM stilbene concentration. Top: Reaction components GC areas, conversion, and yield plotted against uncorrected residence time. Bottom: Reaction components GC areas, conversion, and yield plotted against exposure time, corrected for light inhomogeneity.

#### 2. 4. 2. 5. Switch-Off experiment results using UV-C light and 5.0 mM stilbene concentration

*Cis*-stilbene (44.5  $\mu$ L, 45.0 mg, 0.25 mmol, 1.0 eq., 5.0 mM solution), iodine (6.3 mg, 0.025 mmol, 0.1 eq., 0.5 mM solution), and dibutyl ether (0.15 mL, 117.1 mg, 0.90 mmol, 3.6 eq., 18.0 mM solution) were dissolved in cyclohexane (50.0 mL, 1111.1 vol.), obtained solution was saturated with oxygen by bubbling gaseous O<sub>2</sub> for 15 minutes, and then connected to flow reagents stream. Cyclohexane was connected to flow solvents stream. The UV-A lamp (PISCES PLL 36W) and water cooling were then turned on and system was allowed to equilibrate for 30 minutes. Then reaction mixture was injected into the photoreactor (internal volume of 31.8 mL, 1.00 mm I.D., 1.60 mm O.D., PFA). Effective exposure time was set to 45 minutes (which corresponds to 0.707 mL/min flow rate). Once the photoreactor was filled with reaction mixture, the UV lamp was switched off, the pump was switched to solvent stream, the reaction mixture was eluted from the photoreactor, and was collected into vials (0.375 mL of reaction mixture, diluted to 1.0 mL with acetone). Collected samples were then analysed using off-line GC.

Table S 15. Results of Switch-Off optimisation performed for Mallory reaction of *cis*-stilbene using UV-C light and 5.0 mM stilbene concentration.

| #  | Residence time [min] | Included/Excluded | Reactor volume [mL] | Effective Reactor Volume [mL] | Effective exposure time [min] | IS GC Area | Area Ratio <i>cis</i> -Stilbene/IS | Area Ratio <i>trans</i> -Stilbene/IS | Area Ratio Phenanthrene 10/IS | Area Ratio Dimer ABAB 12/IS | Area Ratio Dimer AABB 11/IS | Area Ratio Product 13/IS | Phenanthrene yield [%] | Dimer 12 yield [%] | Dimer 11 yield [%] | Product 13 yield [%] | <i>trans</i> -Stilbene yield [%] | Remaining <i>cis</i> -Stilbene [%] |
|----|----------------------|-------------------|---------------------|-------------------------------|-------------------------------|------------|------------------------------------|--------------------------------------|-------------------------------|-----------------------------|-----------------------------|--------------------------|------------------------|--------------------|--------------------|----------------------|----------------------------------|------------------------------------|
| 1  | 45.0                 | Excluded          | 31.8                | -                             | -                             | -          | -                                  | -                                    | -                             | -                           | -                           | -                        | -                      | -                  | -                  | -                    | -                                | -                                  |
| 2  | 44.4                 | Excluded          | 31.4                | -                             | -                             | -          | -                                  | -                                    | -                             | -                           | -                           | -                        | -                      | -                  | -                  | -                    | -                                | -                                  |
| 3  | 43.9                 | Excluded          | 31.1                | -                             | -                             | -          | -                                  | -                                    | -                             | -                           | -                           | -                        | -                      | -                  | -                  | -                    | -                                | -                                  |
| 4  | 43.4                 | Excluded          | 30.7                | -                             | -                             | -          | -                                  | -                                    | -                             | -                           | -                           | -                        | -                      | -                  | -                  | -                    | -                                | -                                  |
| 5  | 42.9                 | Excluded          | 30.3                | -                             | -                             | -          | -                                  | -                                    | -                             | -                           | -                           | -                        | -                      | -                  | -                  | -                    | -                                | -                                  |
| 6  | 42.3                 | Included          | 29.9                | 28.5                          | 40.3                          | 51039      | 3.53·10 <sup>-4</sup>              | 1.53·10 <sup>-3</sup>                | 2.93·10 <sup>-1</sup>         | 0.00                        | 0.00                        | 0.00                     | 67.9%                  | 0.00%              | 0.00%              | 0.00%                | 0.35%                            | 0.08%                              |
| 7  | 41.8                 | Included          | 29.6                | 28.1                          | 39.8                          | 53524      | 3.36·10 <sup>-4</sup>              | 1.21·10 <sup>-3</sup>                | 2.98·10 <sup>-1</sup>         | 0.00                        | 0.00                        | 0.00                     | 69.3%                  | 0.00%              | 0.00%              | 0.00%                | 0.28%                            | 0.08%                              |
| 8  | 41.3                 | Included          | 29.2                | 27.8                          | 39.3                          | 50467      | 3.57·10 <sup>-4</sup>              | 1.41·10 <sup>-3</sup>                | 2.97·10 <sup>-1</sup>         | 0.00                        | 0.00                        | 0.00                     | 68.9%                  | 0.00%              | 0.00%              | 0.00%                | 0.33%                            | 0.08%                              |
| 9  | 40.7                 | Included          | 28.8                | 27.4                          | 38.7                          | 51280      | 3.51·10 <sup>-4</sup>              | 1.52·10 <sup>-3</sup>                | 2.97·10 <sup>-1</sup>         | 0.00                        | 0.00                        | 0.00                     | 69.0%                  | 0.00%              | 0.00%              | 0.00%                | 0.35%                            | 0.08%                              |
| 10 | 40.2                 | Included          | 28.4                | 27.0                          | 38.2                          | 53008      | 3.40·10 <sup>-4</sup>              | 1.34·10 <sup>-3</sup>                | 2.96·10 <sup>-1</sup>         | 0.00                        | 0.00                        | 0.00                     | 68.6%                  | 0.00%              | 0.00%              | 0.00%                | 0.31%                            | 0.08%                              |
| 11 | 39.7                 | Included          | 28.1                | 26.6                          | 37.7                          | 54139      | 3.88·10 <sup>-4</sup>              | 1.33·10 <sup>-3</sup>                | 2.98·10 <sup>-1</sup>         | 0.00                        | 0.00                        | 0.00                     | 69.1%                  | 0.00%              | 0.00%              | 0.00%                | 0.31%                            | 0.09%                              |
| 12 | 39.1                 | Included          | 27.7                | 26.3                          | 37.1                          | 54960      | 3.82·10 <sup>-4</sup>              | 1.22·10 <sup>-3</sup>                | 3.01·10 <sup>-1</sup>         | 0.00                        | 0.00                        | 0.00                     | 70.0%                  | 0.00%              | 0.00%              | 0.00%                | 0.28%                            | 0.09%                              |
| 13 | 38.6                 | Included          | 27.3                | 25.9                          | 36.6                          | 52551      | 4.00·10 <sup>-4</sup>              | 1.29·10 <sup>-3</sup>                | 3.07·10 <sup>-1</sup>         | 0.00                        | 0.00                        | 0.00                     | 71.1%                  | 0.00%              | 0.00%              | 0.00%                | 0.30%                            | 0.09%                              |
| 14 | 38.1                 | Included          | 26.9                | 25.5                          | 36.1                          | 55072      | 3.99·10 <sup>-4</sup>              | 1.33·10 <sup>-3</sup>                | 3.00·10 <sup>-1</sup>         | 0.00                        | 0.00                        | 0.00                     | 69.6%                  | 0.00%              | 0.00%              | 0.00%                | 0.31%                            | 0.09%                              |
| 15 | 37.6                 | Included          | 26.6                | 25.1                          | 35.5                          | 56342      | 4.44·10 <sup>-4</sup>              | 1.26·10 <sup>-3</sup>                | 3.10·10 <sup>-1</sup>         | 0.00                        | 0.00                        | 0.00                     | 72.0%                  | 0.00%              | 0.00%              | 0.00%                | 0.29%                            | 0.11%                              |
| 16 | 37.0                 | Included          | 26.2                | 24.8                          | 35.0                          | 55679      | 3.95·10 <sup>-4</sup>              | 1.33·10 <sup>-3</sup>                | 3.11·10 <sup>-1</sup>         | 0.00                        | 0.00                        | 0.00                     | 72.1%                  | 0.00%              | 0.00%              | 0.00%                | 0.31%                            | 0.09%                              |

|    |      |          |      |      |      |       |                       |                       |                       |                       |      |                       |       |       |       |       |       |       |
|----|------|----------|------|------|------|-------|-----------------------|-----------------------|-----------------------|-----------------------|------|-----------------------|-------|-------|-------|-------|-------|-------|
| 17 | 36.5 | Included | 25.8 | 24.4 | 34.5 | 55675 | 3.77·10 <sup>-4</sup> | 1.37·10 <sup>-3</sup> | 3.06·10 <sup>-1</sup> | 0.00                  | 0.00 | 0.00                  | 71.1% | 0.00% | 0.00% | 0.00% | 0.32% | 0.09% |
| 18 | 36.0 | Included | 25.4 | 24.0 | 33.9 | 56093 | 3.74·10 <sup>-4</sup> | 1.41·10 <sup>-3</sup> | 3.03·10 <sup>-1</sup> | 0.00                  | 0.00 | 0.00                  | 70.3% | 0.00% | 0.00% | 0.00% | 0.33% | 0.09% |
| 19 | 35.4 | Included | 25.1 | 23.6 | 33.4 | 62719 | 3.51·10 <sup>-4</sup> | 1.40·10 <sup>-3</sup> | 3.01·10 <sup>-1</sup> | 0.00                  | 0.00 | 0.00                  | 69.8% | 0.00% | 0.00% | 0.00% | 0.33% | 0.08% |
| 20 | 34.9 | Included | 24.7 | 23.3 | 32.9 | 57953 | 3.80·10 <sup>-4</sup> | 1.48·10 <sup>-3</sup> | 3.04·10 <sup>-1</sup> | 0.00                  | 0.00 | 0.00                  | 70.7% | 0.00% | 0.00% | 0.00% | 0.34% | 0.09% |
| 21 | 34.4 | Included | 24.3 | 22.9 | 32.4 | 53154 | 3.57·10 <sup>-4</sup> | 1.30·10 <sup>-3</sup> | 3.00·10 <sup>-1</sup> | 0.00                  | 0.00 | 0.00                  | 69.5% | 0.00% | 0.00% | 0.00% | 0.30% | 0.08% |
| 22 | 33.8 | Included | 23.9 | 22.5 | 31.8 | 57533 | 3.82·10 <sup>-4</sup> | 1.29·10 <sup>-3</sup> | 3.04·10 <sup>-1</sup> | 0.00                  | 0.00 | 0.00                  | 70.5% | 0.00% | 0.00% | 0.00% | 0.30% | 0.09% |
| 23 | 33.3 | Included | 23.6 | 22.1 | 31.3 | 53046 | 3.96·10 <sup>-4</sup> | 1.43·10 <sup>-3</sup> | 3.03·10 <sup>-1</sup> | 0.00                  | 0.00 | 0.00                  | 70.4% | 0.00% | 0.00% | 0.00% | 0.33% | 0.09% |
| 24 | 32.8 | Included | 23.2 | 21.8 | 30.8 | 59145 | 3.55·10 <sup>-4</sup> | 1.45·10 <sup>-3</sup> | 3.08·10 <sup>-1</sup> | 0.00                  | 0.00 | 0.00                  | 71.4% | 0.00% | 0.00% | 0.00% | 0.34% | 0.08% |
| 25 | 32.2 | Included | 22.8 | 21.4 | 30.2 | 55757 | 3.95·10 <sup>-4</sup> | 1.60·10 <sup>-3</sup> | 3.07·10 <sup>-1</sup> | 0.00                  | 0.00 | 0.00                  | 71.2% | 0.00% | 0.00% | 0.00% | 0.37% | 0.09% |
| 26 | 31.7 | Included | 22.4 | 21.0 | 29.7 | 55204 | 3.99·10 <sup>-4</sup> | 1.52·10 <sup>-3</sup> | 3.06·10 <sup>-1</sup> | 0.00                  | 0.00 | 0.00                  | 70.9% | 0.00% | 0.00% | 0.00% | 0.35% | 0.09% |
| 27 | 31.2 | Included | 22.1 | 20.6 | 29.2 | 56854 | 3.52·10 <sup>-4</sup> | 1.53·10 <sup>-3</sup> | 3.05·10 <sup>-1</sup> | 0.00                  | 0.00 | 0.00                  | 70.8% | 0.00% | 0.00% | 0.00% | 0.36% | 0.08% |
| 28 | 30.7 | Included | 21.7 | 20.3 | 28.6 | 55798 | 3.76·10 <sup>-4</sup> | 1.54·10 <sup>-3</sup> | 3.07·10 <sup>-1</sup> | 0.00                  | 0.00 | 0.00                  | 71.2% | 0.00% | 0.00% | 0.00% | 0.36% | 0.09% |
| 29 | 30.1 | Included | 21.3 | 19.9 | 28.1 | 58280 | 3.09·10 <sup>-4</sup> | 1.53·10 <sup>-3</sup> | 3.05·10 <sup>-1</sup> | 0.00                  | 0.00 | 0.00                  | 70.7% | 0.00% | 0.00% | 0.00% | 0.35% | 0.07% |
| 30 | 29.6 | Included | 20.9 | 19.5 | 27.6 | 68723 | 2.91·10 <sup>-4</sup> | 1.51·10 <sup>-3</sup> | 3.10·10 <sup>-1</sup> | 0.00                  | 0.00 | 0.00                  | 71.9% | 0.00% | 0.00% | 0.00% | 0.35% | 0.07% |
| 31 | 29.1 | Included | 20.6 | 19.1 | 27.1 | 58577 | 3.93·10 <sup>-4</sup> | 1.50·10 <sup>-3</sup> | 3.06·10 <sup>-1</sup> | 0.00                  | 0.00 | 0.00                  | 71.0% | 0.00% | 0.00% | 0.00% | 0.35% | 0.09% |
| 32 | 28.5 | Included | 20.2 | 18.8 | 26.5 | 56247 | 3.20·10 <sup>-4</sup> | 1.67·10 <sup>-3</sup> | 3.17·10 <sup>-1</sup> | 0.00                  | 0.00 | 0.00                  | 73.7% | 0.00% | 0.00% | 0.00% | 0.39% | 0.07% |
| 33 | 28.0 | Included | 19.8 | 18.4 | 26.0 | 57484 | 3.48·10 <sup>-4</sup> | 1.57·10 <sup>-3</sup> | 3.12·10 <sup>-1</sup> | 1.74·10 <sup>-4</sup> | 0.00 | 0.00                  | 72.5% | 0.02% | 0.00% | 0.00% | 0.36% | 0.08% |
| 34 | 27.5 | Included | 19.4 | 18.0 | 25.5 | 60465 | 3.47·10 <sup>-4</sup> | 1.54·10 <sup>-3</sup> | 3.10·10 <sup>-1</sup> | 0.00                  | 0.00 | 0.00                  | 71.9% | 0.00% | 0.00% | 0.00% | 0.36% | 0.08% |
| 35 | 26.9 | Included | 19.1 | 17.6 | 24.9 | 54922 | 2.91·10 <sup>-4</sup> | 1.68·10 <sup>-3</sup> | 3.08·10 <sup>-1</sup> | 0.00                  | 0.00 | 0.00                  | 71.4% | 0.00% | 0.00% | 0.00% | 0.39% | 0.07% |
| 36 | 26.4 | Included | 18.7 | 17.3 | 24.4 | 70297 | 3.13·10 <sup>-4</sup> | 1.58·10 <sup>-3</sup> | 3.20·10 <sup>-1</sup> | 0.00                  | 0.00 | 7.38·10 <sup>-4</sup> | 74.3% | 0.00% | 0.00% | 0.09% | 0.37% | 0.07% |
| 37 | 25.9 | Included | 18.3 | 16.9 | 23.9 | 64892 | 2.93·10 <sup>-4</sup> | 1.57·10 <sup>-3</sup> | 3.12·10 <sup>-1</sup> | 2.00·10 <sup>-4</sup> | 0.00 | 0.00                  | 72.3% | 0.02% | 0.00% | 0.00% | 0.36% | 0.07% |
| 38 | 25.4 | Included | 17.9 | 16.5 | 23.3 | 60772 | 2.96·10 <sup>-4</sup> | 1.68·10 <sup>-3</sup> | 3.18·10 <sup>-1</sup> | 0.00                  | 0.00 | 0.00                  | 73.8% | 0.00% | 0.00% | 0.00% | 0.39% | 0.07% |
| 39 | 24.8 | Included | 17.6 | 16.1 | 22.8 | 58752 | 3.06·10 <sup>-4</sup> | 1.65·10 <sup>-3</sup> | 3.17·10 <sup>-1</sup> | 2.55·10 <sup>-4</sup> | 0.00 | 0.00                  | 73.5% | 0.03% | 0.00% | 0.00% | 0.38% | 0.07% |
| 40 | 24.3 | Included | 17.2 | 15.8 | 22.3 | 63471 | 2.99·10 <sup>-4</sup> | 1.64·10 <sup>-3</sup> | 3.10·10 <sup>-1</sup> | 1.58·10 <sup>-4</sup> | 0.00 | 7.59·10 <sup>-4</sup> | 71.9% | 0.02% | 0.00% | 0.09% | 0.38% | 0.07% |
| 41 | 23.8 | Included | 16.8 | 15.4 | 21.7 | 57906 | 3.63·10 <sup>-4</sup> | 1.55·10 <sup>-3</sup> | 3.10·10 <sup>-1</sup> | 3.11·10 <sup>-4</sup> | 0.00 | 0.00                  | 71.9% | 0.04% | 0.00% | 0.00% | 0.36% | 0.09% |
| 42 | 23.2 | Included | 16.4 | 15.0 | 21.2 | 77791 | 3.09·10 <sup>-4</sup> | 1.68·10 <sup>-3</sup> | 3.06·10 <sup>-1</sup> | 2.06·10 <sup>-4</sup> | 0.00 | 0.00                  | 71.0% | 0.02% | 0.00% | 0.00% | 0.39% | 0.07% |
| 43 | 22.7 | Included | 16.1 | 14.6 | 20.7 | 57147 | 2.97·10 <sup>-4</sup> | 1.64·10 <sup>-3</sup> | 3.07·10 <sup>-1</sup> | 2.97·10 <sup>-4</sup> | 0.00 | 8.43·10 <sup>-4</sup> | 71.2% | 0.03% | 0.00% | 0.10% | 0.38% | 0.07% |
| 44 | 22.2 | Included | 15.7 | 14.3 | 20.2 | 56193 | 3.38·10 <sup>-4</sup> | 1.71·10 <sup>-3</sup> | 3.05·10 <sup>-1</sup> | 3.20·10 <sup>-4</sup> | 0.00 | 1.05·10 <sup>-3</sup> | 70.8% | 0.04% | 0.00% | 0.12% | 0.40% | 0.08% |
| 45 | 21.6 | Included | 15.3 | 13.9 | 19.6 | 64967 | 3.69·10 <sup>-4</sup> | 1.62·10 <sup>-3</sup> | 3.06·10 <sup>-1</sup> | 3.54·10 <sup>-4</sup> | 0.00 | 7.98·10 <sup>-4</sup> | 71.1% | 0.04% | 0.00% | 0.09% | 0.38% | 0.09% |
| 46 | 21.1 | Included | 14.9 | 13.5 | 19.1 | 67465 | 3.41·10 <sup>-4</sup> | 1.67·10 <sup>-3</sup> | 3.09·10 <sup>-1</sup> | 3.41·10 <sup>-4</sup> | 0.00 | 9.33·10 <sup>-4</sup> | 71.8% | 0.04% | 0.00% | 0.11% | 0.39% | 0.08% |

|    |      |          |      |      |      |       |                       |                       |                       |                       |                       |                       |       |       |       |       |       |       |
|----|------|----------|------|------|------|-------|-----------------------|-----------------------|-----------------------|-----------------------|-----------------------|-----------------------|-------|-------|-------|-------|-------|-------|
| 47 | 20.6 | Included | 14.6 | 13.1 | 18.6 | 81310 | 3.94·10 <sup>-4</sup> | 1.56·10 <sup>-3</sup> | 3.09·10 <sup>-1</sup> | 3.20·10 <sup>-4</sup> | 0.00                  | 1.00·10 <sup>-3</sup> | 71.7% | 0.04% | 0.00% | 0.12% | 0.36% | 0.09% |
| 48 | 20.0 | Included | 14.2 | 12.8 | 18.0 | 59129 | 4.23·10 <sup>-4</sup> | 1.56·10 <sup>-3</sup> | 3.14·10 <sup>-1</sup> | 4.23·10 <sup>-4</sup> | 0.00                  | 1.19·10 <sup>-3</sup> | 72.8% | 0.05% | 0.00% | 0.14% | 0.36% | 0.10% |
| 49 | 19.5 | Included | 13.8 | 12.4 | 17.5 | 58453 | 4.79·10 <sup>-4</sup> | 1.63·10 <sup>-3</sup> | 3.07·10 <sup>-1</sup> | 3.76·10 <sup>-4</sup> | 0.00                  | 1.65·10 <sup>-3</sup> | 71.2% | 0.04% | 0.00% | 0.19% | 0.38% | 0.11% |
| 50 | 19.0 | Included | 13.4 | 12.0 | 17.0 | 62446 | 6.09·10 <sup>-4</sup> | 1.52·10 <sup>-3</sup> | 3.04·10 <sup>-1</sup> | 4.16·10 <sup>-4</sup> | 0.00                  | 1.84·10 <sup>-3</sup> | 70.5% | 0.05% | 0.00% | 0.21% | 0.35% | 0.15% |
| 51 | 18.5 | Included | 13.1 | 11.6 | 16.4 | 80672 | 7.69·10 <sup>-4</sup> | 1.36·10 <sup>-3</sup> | 3.08·10 <sup>-1</sup> | 4.83·10 <sup>-4</sup> | 0.00                  | 1.97·10 <sup>-3</sup> | 71.5% | 0.06% | 0.00% | 0.23% | 0.32% | 0.19% |
| 52 | 17.9 | Included | 12.7 | 11.3 | 15.9 | 60667 | 9.23·10 <sup>-4</sup> | 1.48·10 <sup>-3</sup> | 3.04·10 <sup>-1</sup> | 3.96·10 <sup>-4</sup> | 0.00                  | 2.81·10 <sup>-3</sup> | 70.5% | 0.05% | 0.00% | 0.33% | 0.34% | 0.23% |
| 53 | 17.4 | Included | 12.3 | 10.9 | 15.4 | 57246 | 1.10·10 <sup>-3</sup> | 1.43·10 <sup>-3</sup> | 3.10·10 <sup>-1</sup> | 4.89·10 <sup>-4</sup> | 0.00                  | 2.85·10 <sup>-3</sup> | 71.9% | 0.06% | 0.00% | 0.33% | 0.33% | 0.27% |
| 54 | 16.9 | Included | 11.9 | 10.5 | 14.9 | 62404 | 1.31·10 <sup>-3</sup> | 1.35·10 <sup>-3</sup> | 3.09·10 <sup>-1</sup> | 4.81·10 <sup>-4</sup> | 0.00                  | 3.38·10 <sup>-3</sup> | 71.7% | 0.06% | 0.00% | 0.39% | 0.31% | 0.32% |
| 55 | 16.3 | Included | 11.6 | 10.1 | 14.3 | 60555 | 1.50·10 <sup>-3</sup> | 1.26·10 <sup>-3</sup> | 3.00·10 <sup>-1</sup> | 5.12·10 <sup>-4</sup> | 0.00                  | 5.44·10 <sup>-3</sup> | 69.6% | 0.06% | 0.00% | 0.63% | 0.29% | 0.37% |
| 56 | 15.8 | Included | 11.2 | 9.8  | 13.8 | 64184 | 1.95·10 <sup>-3</sup> | 1.29·10 <sup>-3</sup> | 3.00·10 <sup>-1</sup> | 5.76·10 <sup>-4</sup> | 0.00                  | 5.77·10 <sup>-3</sup> | 69.6% | 0.07% | 0.00% | 0.67% | 0.30% | 0.48% |
| 57 | 15.3 | Included | 10.8 | 9.4  | 13.3 | 71704 | 2.51·10 <sup>-3</sup> | 1.37·10 <sup>-3</sup> | 3.16·10 <sup>-1</sup> | 6.55·10 <sup>-4</sup> | 0.00                  | 6.82·10 <sup>-3</sup> | 73.3% | 0.08% | 0.00% | 0.79% | 0.32% | 0.62% |
| 58 | 14.7 | Included | 10.4 | 9.0  | 12.7 | 57831 | 2.89·10 <sup>-3</sup> | 9.68·10 <sup>-3</sup> | 3.01·10 <sup>-1</sup> | 5.53·10 <sup>-4</sup> | 1.73·10 <sup>-4</sup> | 1.04·10 <sup>-2</sup> | 69.9% | 0.06% | 0.02% | 1.20% | 0.22% | 0.72% |
| 59 | 14.2 | Included | 10.1 | 8.6  | 12.2 | 70903 | 3.88·10 <sup>-3</sup> | 1.09·10 <sup>-3</sup> | 3.10·10 <sup>-1</sup> | 6.21·10 <sup>-4</sup> | 1.69·10 <sup>-4</sup> | 8.93·10 <sup>-3</sup> | 71.9% | 0.07% | 0.02% | 1.04% | 0.25% | 0.97% |
| 60 | 13.7 | Included | 9.7  | 8.3  | 11.7 | 59325 | 4.48·10 <sup>-3</sup> | 1.18·10 <sup>-3</sup> | 2.92·10 <sup>-1</sup> | 6.24·10 <sup>-4</sup> | 2.02·10 <sup>-4</sup> | 1.10·10 <sup>-2</sup> | 67.9% | 0.07% | 0.02% | 1.28% | 0.27% | 1.12% |
| 61 | 13.2 | Included | 9.3  | 7.9  | 11.1 | 59735 | 5.68·10 <sup>-3</sup> | 1.12·10 <sup>-3</sup> | 2.98·10 <sup>-1</sup> | 7.20·10 <sup>-4</sup> | 2.01·10 <sup>-4</sup> | 1.20·10 <sup>-2</sup> | 69.2% | 0.08% | 0.02% | 1.39% | 0.26% | 1.41% |
| 62 | 12.6 | Included | 8.9  | 7.5  | 10.6 | 65230 | 7.42·10 <sup>-3</sup> | 9.81·10 <sup>-4</sup> | 2.98·10 <sup>-1</sup> | 7.51·10 <sup>-4</sup> | 2.30·10 <sup>-4</sup> | 1.30·10 <sup>-2</sup> | 69.2% | 0.09% | 0.03% | 1.51% | 0.23% | 1.85% |
| 63 | 12.1 | Included | 8.6  | 7.1  | 10.1 | 62585 | 9.08·10 <sup>-3</sup> | 8.79·10 <sup>-4</sup> | 2.88·10 <sup>-1</sup> | 6.39·10 <sup>-4</sup> | 2.08·10 <sup>-4</sup> | 1.56·10 <sup>-2</sup> | 66.8% | 0.07% | 0.02% | 1.81% | 0.20% | 2.27% |
| 64 | 11.6 | Included | 8.2  | 6.8  | 9.5  | 61799 | 1.22·10 <sup>-2</sup> | 7.77·10 <sup>-4</sup> | 2.90·10 <sup>-1</sup> | 8.41·10 <sup>-4</sup> | 2.91·10 <sup>-4</sup> | 1.64·10 <sup>-2</sup> | 67.3% | 0.10% | 0.03% | 1.91% | 0.18% | 3.05% |
| 65 | 11.0 | Included | 7.8  | 6.4  | 9.0  | 51540 | 1.40·10 <sup>-2</sup> | 5.82·10 <sup>-4</sup> | 2.78·10 <sup>-1</sup> | 9.31·10 <sup>-4</sup> | 3.30·10 <sup>-4</sup> | 2.03·10 <sup>-2</sup> | 64.5% | 0.11% | 0.04% | 2.36% | 0.14% | 3.50% |
| 66 | 10.5 | Included | 7.4  | 6.0  | 8.5  | 86737 | 2.04·10 <sup>-2</sup> | 4.96·10 <sup>-4</sup> | 2.84·10 <sup>-1</sup> | 1.03·10 <sup>-3</sup> | 4.04·10 <sup>-4</sup> | 1.40·10 <sup>-2</sup> | 66.0% | 0.12% | 0.05% | 1.62% | 0.12% | 5.11% |
| 67 | 10.0 | Included | 7.1  | 5.6  | 8.0  | 70852 | 2.16·10 <sup>-2</sup> | 4.52·10 <sup>-4</sup> | 2.71·10 <sup>-1</sup> | 1.07·10 <sup>-3</sup> | 4.80·10 <sup>-4</sup> | 2.43·10 <sup>-2</sup> | 63.0% | 0.12% | 0.06% | 2.81% | 0.10% | 5.40% |
| 68 | 9.4  | Included | 6.7  | 5.3  | 7.4  | 57139 | 3.39·10 <sup>-2</sup> | 3.15·10 <sup>-4</sup> | 2.60·10 <sup>-1</sup> | 1.16·10 <sup>-3</sup> | 6.65·10 <sup>-4</sup> | 1.29·10 <sup>-2</sup> | 60.4% | 0.13% | 0.08% | 1.50% | 0.07% | 8.48% |
| 69 | 8.9  | Included | 6.3  | 4.9  | 6.9  | 58569 | 5.34·10 <sup>-2</sup> | 1.71·10 <sup>-4</sup> | 2.54·10 <sup>-1</sup> | 1.18·10 <sup>-3</sup> | 5.12·10 <sup>-4</sup> | 2.24·10 <sup>-2</sup> | 58.9% | 0.14% | 0.06% | 2.61% | 0.04% | 13.4% |
| 70 | 8.4  | Included | 5.9  | 4.5  | 6.4  | 68803 | 7.30·10 <sup>-2</sup> | 0.00                  | 2.42·10 <sup>-1</sup> | 1.24·10 <sup>-3</sup> | 5.52·10 <sup>-4</sup> | 1.99·10 <sup>-2</sup> | 56.2% | 0.14% | 0.06% | 2.31% | 0.00% | 18.3% |
| 71 | 7.9  | Included | 5.6  | 4.1  | 5.8  | 69290 | 9.28·10 <sup>-2</sup> | 0.00                  | 2.37·10 <sup>-1</sup> | 1.34·10 <sup>-3</sup> | 6.78·10 <sup>-4</sup> | 2.16·10 <sup>-2</sup> | 55.0% | 0.16% | 0.08% | 2.51% | 0.00% | 23.2% |
| 72 | 7.3  | Included | 5.2  | 3.8  | 5.3  | 63072 | 1.05·10 <sup>-1</sup> | 0.00                  | 2.31·10 <sup>-1</sup> | 1.28·10 <sup>-3</sup> | 6.02·10 <sup>-4</sup> | 2.38·10 <sup>-2</sup> | 53.7% | 0.15% | 0.07% | 2.77% | 0.00% | 26.3% |
| 73 | 6.8  | Included | 4.8  | 3.4  | 4.8  | 59122 | 1.27·10 <sup>-1</sup> | 0.00                  | 2.20·10 <sup>-1</sup> | 1.54·10 <sup>-3</sup> | 6.09·10 <sup>-4</sup> | 2.26·10 <sup>-2</sup> | 51.0% | 0.18% | 0.07% | 2.62% | 0.00% | 31.7% |
| 74 | 6.3  | Included | 4.4  | 3.0  | 4.2  | 61874 | 1.51·10 <sup>-1</sup> | 0.00                  | 2.08·10 <sup>-1</sup> | 1.37·10 <sup>-3</sup> | 7.11·10 <sup>-4</sup> | 1.98·10 <sup>-2</sup> | 48.3% | 0.16% | 0.08% | 2.30% | 0.00% | 37.7% |
| 75 | 5.7  | Included | 4.1  | 2.6  | 3.7  | 62742 | 1.75·10 <sup>-1</sup> | 0.00                  | 1.93·10 <sup>-1</sup> | 1.59·10 <sup>-3</sup> | 9.24·10 <sup>-4</sup> | 1.91·10 <sup>-2</sup> | 44.7% | 0.18% | 0.11% | 2.21% | 0.00% | 43.8% |
| 76 | 5.2  | Included | 3.7  | 2.3  | 3.2  | 63366 | 2.03·10 <sup>-1</sup> | 0.00                  | 1.76·10 <sup>-1</sup> | 1.37·10 <sup>-3</sup> | 6.94·10 <sup>-4</sup> | 1.84·10 <sup>-2</sup> | 40.9% | 0.16% | 0.08% | 2.13% | 0.00% | 50.9% |

|    |     |          |     |     |     |       |                      |      |                      |                      |                      |                      |       |       |       |       |       |        |
|----|-----|----------|-----|-----|-----|-------|----------------------|------|----------------------|----------------------|----------------------|----------------------|-------|-------|-------|-------|-------|--------|
| 77 | 4.7 | Included | 3.3 | 1.9 | 2.7 | 64692 | $2.38 \cdot 10^{-1}$ | 0.00 | $1.59 \cdot 10^{-1}$ | $1.33 \cdot 10^{-3}$ | $7.73 \cdot 10^{-4}$ | $1.70 \cdot 10^{-2}$ | 36.9% | 0.15% | 0.09% | 1.97% | 0.00% | 59.4%  |
| 78 | 4.1 | Included | 2.9 | 1.5 | 2.1 | 71239 | $2.71 \cdot 10^{-1}$ | 0.00 | $1.37 \cdot 10^{-1}$ | $1.21 \cdot 10^{-3}$ | $6.60 \cdot 10^{-4}$ | $1.33 \cdot 10^{-2}$ | 31.8% | 0.14% | 0.08% | 1.54% | 0.00% | 67.9%  |
| 79 | 3.6 | Included | 2.6 | 1.1 | 1.6 | 72199 | $3.14 \cdot 10^{-1}$ | 0.00 | $1.17 \cdot 10^{-1}$ | $1.14 \cdot 10^{-3}$ | $7.20 \cdot 10^{-4}$ | $1.34 \cdot 10^{-2}$ | 27.3% | 0.13% | 0.08% | 1.56% | 0.00% | 78.5%  |
| 80 | 3.1 | Included | 2.2 | 0.8 | 1.1 | 65174 | $3.33 \cdot 10^{-1}$ | 0.00 | $9.05 \cdot 10^{-2}$ | $9.36 \cdot 10^{-4}$ | $4.45 \cdot 10^{-4}$ | $1.20 \cdot 10^{-2}$ | 21.0% | 0.11% | 0.05% | 1.40% | 0.00% | 83.2%  |
| 81 | 2.5 | Included | 1.8 | 0.4 | 0.5 | 83434 | $3.70 \cdot 10^{-1}$ | 0.00 | $7.07 \cdot 10^{-2}$ | $9.35 \cdot 10^{-4}$ | $4.31 \cdot 10^{-4}$ | $6.84 \cdot 10^{-3}$ | 16.4% | 0.11% | 0.05% | 0.79% | 0.00% | 92.7%  |
| 82 | 2.0 | Included | 1.4 | 0.0 | 0.0 | 90107 | $4.00 \cdot 10^{-1}$ | 0.00 | $5.15 \cdot 10^{-2}$ | $8.77 \cdot 10^{-4}$ | $4.55 \cdot 10^{-4}$ | $7.69 \cdot 10^{-3}$ | 12.0% | 0.10% | 0.05% | 0.89% | 0.00% | 100.0% |
| 83 | 1.5 | Excluded | 1.1 | -   | -   | -     | -                    | -    | -                    | -                    | -                    | -                    | -     | -     | -     | -     | -     | -      |
| 84 | 1.0 | Excluded | 0.7 | -   | -   | -     | -                    | -    | -                    | -                    | -                    | -                    | -     | -     | -     | -     | -     | -      |
| 85 | 0.4 | Excluded | 0.3 | -   | -   | -     | -                    | -    | -                    | -                    | -                    | -                    | -     | -     | -     | -     | -     | -      |
| 86 | 0.0 | Excluded | 0.0 | -   | -   | -     | -                    | -    | -                    | -                    | -                    | -                    | -     | -     | -     | -     | -     | -      |



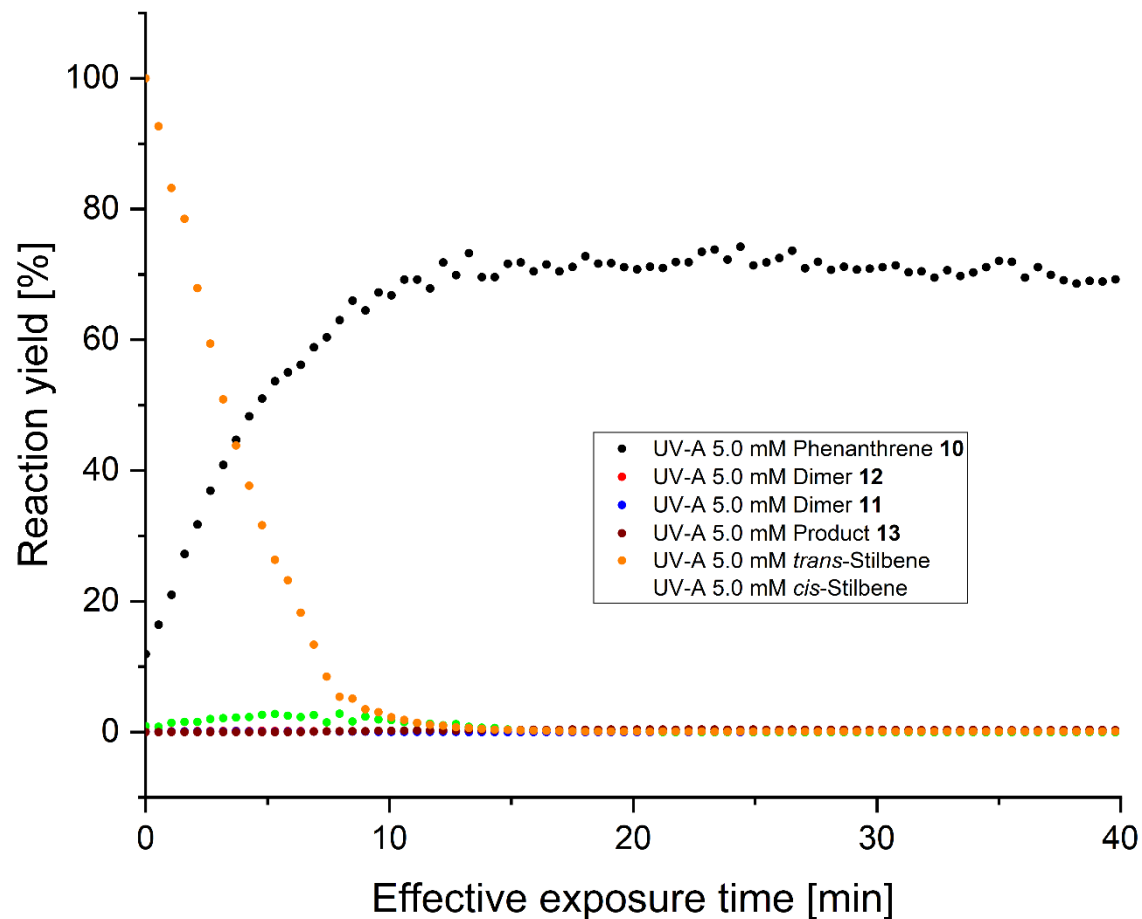

Figure S 20. Results of Switch-Off optimisation of Mallory photoreaction using UV-C light and 5.0 mM stilbene concentration. Top: Reaction components GC areas, conversion, and yield plotted against uncorrected residence time. Bottom: Reaction components GC areas, conversion, and yield plotted against exposure time, corrected for light inhomogeneity.

#### 2. 4. 2. 6. Switch-Off experiment results using UV-C light and 50.0 mM stilbene concentration

*Cis*-stilbene (445.0  $\mu$ L, 450.2 mg, 2.50 mmol, 1.0 eq., 50.0 mM solution), iodine (63.0 mg, 0.25 mmol, 0.1 eq., 5.0 mM solution), and dibutyl ether (1.5 mL, 1.17 g, 9.0 mmol, 3.6 eq., 180.0 mM solution) were dissolved in cyclohexane (48.0 mL, 106.6 vol.), obtained solution was saturated with oxygen by bubbling gaseous O<sub>2</sub> for 15 minutes, and then connected to flow reagents stream. Cyclohexane was connected to flow solvents stream. The UV-C lamp (PISCES PLL 36W) and water cooling were then turned on and system was allowed to equilibrate for 30 minutes. Then reaction mixture was injected into the photoreactor (internal volume of 31.8 mL, 1.00 mm I.D., 1.60 mm O.D., PFA).

Effective exposure time was set to 180 minutes (which corresponds to 0.177 mL/min flow rate). Once the photoreactor was filled with reaction mixture, the UV lamp was switched off, the pump was switched to solvent stream, the reaction mixture was eluted from the photoreactor, and was collected into vials (0.375 mL of reaction mixture, diluted to 1.0 mL with acetone). Collected samples were then analysed using off-line GC.

Table S 16. Results of Switch-Off optimisation performed for Mallory reaction of *cis*-stilbene using UV-C light and 50.0 mM stilbene concentration.

| #  | Residence time [min] | Included/Excluded | Reactor volume [mL] | Effective Reactor Volume [mL] | Effective exposure time [min] | IS GC Area | Area Ratio <i>cis</i> -Stilbene/IS | Area Ratio <i>trans</i> -Stilbene/IS | Area Ratio Phenanthrene 10/IS | Area Ratio Dimer ABAB 12/IS | Area Ratio Dimer AABB 11/IS | Area Ratio Product 13/IS | Phenanthrene yield [%] | Dimer 12 yield [%] | Dimer 11 yield [%] | Product 13 yield [%] | <i>trans</i> -Stilbene yield [%] | Remaining <i>cis</i> -Stilbene [%] |
|----|----------------------|-------------------|---------------------|-------------------------------|-------------------------------|------------|------------------------------------|--------------------------------------|-------------------------------|-----------------------------|-----------------------------|--------------------------|------------------------|--------------------|--------------------|----------------------|----------------------------------|------------------------------------|
| 1  | 174.0                | Excluded          | 30.8                | -                             | -                             | -          | -                                  | -                                    | -                             | -                           | -                           | -                        | -                      | -                  | -                  | -                    | -                                | -                                  |
| 2  | 171.9                | Excluded          | 30.4                | -                             | -                             | -          | -                                  | -                                    | -                             | -                           | -                           | -                        | -                      | -                  | -                  | -                    | -                                | -                                  |
| 3  | 169.8                | Excluded          | 30.1                | -                             | -                             | -          | -                                  | -                                    | -                             | -                           | -                           | -                        | -                      | -                  | -                  | -                    | -                                | -                                  |
| 4  | 167.7                | Excluded          | 29.7                | -                             | -                             | -          | -                                  | -                                    | -                             | -                           | -                           | -                        | -                      | -                  | -                  | -                    | -                                | -                                  |
| 5  | 165.5                | Included          | 29.3                | 27.8                          | 156.8                         | 50933      | 0.00                               | 0.00                                 | $3.07 \cdot 10^{-1}$          | 0.00                        | 0.00                        | 0.00                     | 71.1%                  | 0.00%              | 0.00%              | 0.00%                | 0.00%                            | 0.00%                              |
| 6  | 163.4                | Included          | 28.9                | 27.4                          | 154.7                         | 50906      | 0.00                               | 0.00                                 | $2.95 \cdot 10^{-1}$          | 0.00                        | 0.00                        | 0.00                     | 68.5%                  | 0.00%              | 0.00%              | 0.00%                | 0.00%                            | 0.00%                              |
| 7  | 161.3                | Included          | 28.6                | 27.0                          | 152.5                         | 53446      | 0.00                               | 0.00                                 | $3.00 \cdot 10^{-1}$          | 0.00                        | 0.00                        | 0.00                     | 69.7%                  | 0.00%              | 0.00%              | 0.00%                | 0.00%                            | 0.00%                              |
| 8  | 159.2                | Included          | 28.2                | 26.6                          | 150.4                         | 50325      | 0.00                               | 0.00                                 | $2.99 \cdot 10^{-1}$          | 0.00                        | 0.00                        | 0.00                     | 69.5%                  | 0.00%              | 0.00%              | 0.00%                | 0.00%                            | 0.00%                              |
| 9  | 157.1                | Included          | 27.8                | 26.3                          | 148.3                         | 51194      | 0.00                               | 0.00                                 | $2.99 \cdot 10^{-1}$          | 0.00                        | 0.00                        | 0.00                     | 69.4%                  | 0.00%              | 0.00%              | 0.00%                | 0.00%                            | 0.00%                              |
| 10 | 154.9                | Included          | 27.4                | 25.9                          | 146.2                         | 52919      | 0.00                               | 0.00                                 | $2.97 \cdot 10^{-1}$          | 0.00                        | 0.00                        | 0.00                     | 69.0%                  | 0.00%              | 0.00%              | 0.00%                | 0.00%                            | 0.00%                              |
| 11 | 152.8                | Included          | 27.1                | 25.5                          | 144.1                         | 54042      | 0.00                               | 0.00                                 | $2.99 \cdot 10^{-1}$          | 0.00                        | 0.00                        | 0.00                     | 69.5%                  | 0.00%              | 0.00%              | 0.00%                | 0.00%                            | 0.00%                              |
| 12 | 150.7                | Included          | 26.7                | 25.1                          | 141.9                         | 54875      | 0.00                               | 0.00                                 | $3.03 \cdot 10^{-1}$          | 0.00                        | 0.00                        | 0.00                     | 70.3%                  | 0.00%              | 0.00%              | 0.00%                | 0.00%                            | 0.00%                              |
| 13 | 148.6                | Included          | 26.3                | 24.8                          | 139.8                         | 52435      | 0.00                               | 0.00                                 | $3.08 \cdot 10^{-1}$          | 0.00                        | 0.00                        | 0.00                     | 71.6%                  | 0.00%              | 0.00%              | 0.00%                | 0.00%                            | 0.00%                              |
| 14 | 146.5                | Included          | 25.9                | 24.4                          | 137.7                         | 54972      | 0.00                               | 0.00                                 | $3.01 \cdot 10^{-1}$          | 0.00                        | 0.00                        | 0.00                     | 69.9%                  | 0.00%              | 0.00%              | 0.00%                | 0.00%                            | 0.00%                              |
| 15 | 144.4                | Included          | 25.6                | 24.0                          | 135.6                         | 56191      | 0.00                               | 0.00                                 | $3.12 \cdot 10^{-1}$          | 0.00                        | 0.00                        | 0.00                     | 72.4%                  | 0.00%              | 0.00%              | 0.00%                | 0.00%                            | 0.00%                              |
| 16 | 142.2                | Included          | 25.2                | 23.6                          | 133.5                         | 55545      | 0.00                               | 0.00                                 | $3.12 \cdot 10^{-1}$          | 0.00                        | 0.00                        | 0.00                     | 72.4%                  | 0.00%              | 0.00%              | 0.00%                | 0.00%                            | 0.00%                              |
| 17 | 140.1                | Included          | 24.8                | 23.3                          | 131.4                         | 55517      | 0.00                               | 0.00                                 | $3.08 \cdot 10^{-1}$          | 0.00                        | 0.00                        | 0.00                     | 71.6%                  | 0.00%              | 0.00%              | 0.00%                | 0.00%                            | 0.00%                              |
| 18 | 138.0                | Included          | 24.4                | 22.9                          | 129.2                         | 55964      | 0.00                               | 0.00                                 | $3.04 \cdot 10^{-1}$          | 0.00                        | 0.00                        | 0.00                     | 70.6%                  | 0.00%              | 0.00%              | 0.00%                | 0.00%                            | 0.00%                              |
| 19 | 135.9                | Included          | 24.1                | 22.5                          | 127.1                         | 62613      | 0.00                               | 0.00                                 | $3.03 \cdot 10^{-1}$          | 0.00                        | 0.00                        | 0.00                     | 70.3%                  | 0.00%              | 0.00%              | 0.00%                | 0.00%                            | 0.00%                              |
| 20 | 133.8                | Included          | 23.7                | 22.1                          | 125.0                         | 57839      | 0.00                               | 0.00                                 | $3.06 \cdot 10^{-1}$          | 0.00                        | 0.00                        | 0.00                     | 71.0%                  | 0.00%              | 0.00%              | 0.00%                | 0.00%                            | 0.00%                              |
| 21 | 131.6                | Included          | 23.3                | 21.8                          | 122.9                         | 53018      | 0.00                               | 0.00                                 | $3.01 \cdot 10^{-1}$          | 0.00                        | 0.00                        | 0.00                     | 70.0%                  | 0.00%              | 0.00%              | 0.00%                | 0.00%                            | 0.00%                              |

|    |       |          |      |      |       |       |                      |      |                      |                      |                      |                      |       |       |       |       |       |       |
|----|-------|----------|------|------|-------|-------|----------------------|------|----------------------|----------------------|----------------------|----------------------|-------|-------|-------|-------|-------|-------|
| 22 | 129.5 | Included | 22.9 | 21.4 | 120.8 | 57429 | 0.00                 | 0.00 | $3.05 \cdot 10^{-1}$ | 0.00                 | 0.00                 | 0.00                 | 70.8% | 0.00% | 0.00% | 0.00% | 0.00% | 0.00% |
| 23 | 127.4 | Included | 22.6 | 21.0 | 118.6 | 52904 | 0.00                 | 0.00 | $3.05 \cdot 10^{-1}$ | 0.00                 | 0.00                 | 0.00                 | 70.8% | 0.00% | 0.00% | 0.00% | 0.00% | 0.00% |
| 24 | 125.3 | Included | 22.2 | 20.6 | 116.5 | 59021 | 0.00                 | 0.00 | $3.10 \cdot 10^{-1}$ | 0.00                 | 0.00                 | 0.00                 | 71.8% | 0.00% | 0.00% | 0.00% | 0.00% | 0.00% |
| 25 | 123.2 | Included | 21.8 | 20.3 | 114.4 | 55592 | 0.00                 | 0.00 | $3.09 \cdot 10^{-1}$ | 0.00                 | 0.00                 | 0.00                 | 71.7% | 0.00% | 0.00% | 0.00% | 0.00% | 0.00% |
| 26 | 121.0 | Included | 21.4 | 19.9 | 112.3 | 55079 | 0.00                 | 0.00 | $3.08 \cdot 10^{-1}$ | 0.00                 | 0.00                 | 0.00                 | 71.4% | 0.00% | 0.00% | 0.00% | 0.00% | 0.00% |
| 27 | 118.9 | Included | 21.1 | 19.5 | 110.2 | 56719 | 0.00                 | 0.00 | $3.07 \cdot 10^{-1}$ | 0.00                 | 0.00                 | 0.00                 | 71.2% | 0.00% | 0.00% | 0.00% | 0.00% | 0.00% |
| 28 | 116.8 | Included | 20.7 | 19.1 | 108.1 | 55666 | 0.00                 | 0.00 | $3.09 \cdot 10^{-1}$ | 0.00                 | 0.00                 | 0.00                 | 71.6% | 0.00% | 0.00% | 0.00% | 0.00% | 0.00% |
| 29 | 114.7 | Included | 20.3 | 18.8 | 105.9 | 58166 | 0.00                 | 0.00 | $3.06 \cdot 10^{-1}$ | 0.00                 | 0.00                 | 0.00                 | 71.1% | 0.00% | 0.00% | 0.00% | 0.00% | 0.00% |
| 30 | 112.6 | Included | 19.9 | 18.4 | 103.8 | 68542 | 0.00                 | 0.00 | $3.12 \cdot 10^{-1}$ | 0.00                 | 0.00                 | 0.00                 | 72.3% | 0.00% | 0.00% | 0.00% | 0.00% | 0.00% |
| 31 | 110.5 | Included | 19.6 | 18.0 | 101.7 | 58443 | 0.00                 | 0.00 | $3.08 \cdot 10^{-1}$ | 0.00                 | 0.00                 | 0.00                 | 71.4% | 0.00% | 0.00% | 0.00% | 0.00% | 0.00% |
| 32 | 108.3 | Included | 19.2 | 17.6 | 99.6  | 56081 | 0.00                 | 0.00 | $3.19 \cdot 10^{-1}$ | 0.00                 | 0.00                 | 0.00                 | 74.1% | 0.00% | 0.00% | 0.00% | 0.00% | 0.00% |
| 33 | 106.2 | Included | 18.8 | 17.3 | 97.5  | 57354 | 0.00                 | 0.00 | $3.14 \cdot 10^{-1}$ | 0.00                 | 0.00                 | 0.00                 | 72.9% | 0.00% | 0.00% | 0.00% | 0.00% | 0.00% |
| 34 | 104.1 | Included | 18.4 | 16.9 | 95.3  | 60306 | 0.00                 | 0.00 | $3.11 \cdot 10^{-1}$ | 0.00                 | 0.00                 | 0.00                 | 72.3% | 0.00% | 0.00% | 0.00% | 0.00% | 0.00% |
| 35 | 102.0 | Included | 18.1 | 16.5 | 93.2  | 54768 | 0.00                 | 0.00 | $3.09 \cdot 10^{-1}$ | $2.74 \cdot 10^{-4}$ | $9.1 \cdot 10^{-5}$  | 0.00                 | 71.8% | 0.03% | 0.01% | 0.00% | 0.00% | 0.00% |
| 36 | 99.9  | Included | 17.7 | 16.1 | 91.1  | 70109 | 0.00                 | 0.00 | $3.22 \cdot 10^{-1}$ | $3.14 \cdot 10^{-4}$ | $2.00 \cdot 10^{-4}$ | 0.00                 | 74.7% | 0.04% | 0.02% | 0.00% | 0.00% | 0.00% |
| 37 | 97.7  | Included | 17.3 | 15.8 | 89.0  | 64735 | 0.00                 | 0.00 | $3.13 \cdot 10^{-1}$ | $4.79 \cdot 10^{-4}$ | $1.85 \cdot 10^{-4}$ | 0.00                 | 72.7% | 0.06% | 0.02% | 0.00% | 0.00% | 0.00% |
| 38 | 95.6  | Included | 16.9 | 15.4 | 86.9  | 60582 | 0.00                 | 0.00 | $3.20 \cdot 10^{-1}$ | $4.29 \cdot 10^{-4}$ | $1.98 \cdot 10^{-4}$ | 0.00                 | 74.2% | 0.05% | 0.02% | 0.00% | 0.00% | 0.00% |
| 39 | 93.5  | Included | 16.6 | 15.0 | 84.7  | 58556 | 0.00                 | 0.00 | $3.19 \cdot 10^{-1}$ | $5.64 \cdot 10^{-4}$ | $2.56 \cdot 10^{-4}$ | 0.00                 | 73.9% | 0.07% | 0.03% | 0.00% | 0.00% | 0.00% |
| 40 | 91.4  | Included | 16.2 | 14.6 | 82.6  | 63323 | 0.00                 | 0.00 | $3.11 \cdot 10^{-1}$ | $4.11 \cdot 10^{-4}$ | $1.74 \cdot 10^{-4}$ | 0.00                 | 72.3% | 0.05% | 0.02% | 0.00% | 0.00% | 0.00% |
| 41 | 89.3  | Included | 15.8 | 14.3 | 80.5  | 57767 | 0.00                 | 0.00 | $3.11 \cdot 10^{-1}$ | $6.06 \cdot 10^{-4}$ | $2.42 \cdot 10^{-4}$ | 0.00                 | 72.2% | 0.07% | 0.03% | 0.00% | 0.00% | 0.00% |
| 42 | 87.1  | Included | 15.4 | 13.9 | 78.4  | 77608 | $3.61 \cdot 10^{-4}$ | 0.00 | $3.07 \cdot 10^{-1}$ | $5.80 \cdot 10^{-4}$ | $2.71 \cdot 10^{-4}$ | $7.64 \cdot 10^{-4}$ | 71.3% | 0.07% | 0.03% | 0.10% | 0.00% | 0.09% |
| 43 | 85.0  | Included | 15.1 | 13.5 | 76.3  | 56972 | $1.76 \cdot 10^{-4}$ | 0.00 | $3.09 \cdot 10^{-1}$ | $5.44 \cdot 10^{-4}$ | $1.93 \cdot 10^{-4}$ | $1.24 \cdot 10^{-3}$ | 71.7% | 0.06% | 0.02% | 0.17% | 0.00% | 0.04% |
| 44 | 82.9  | Included | 14.7 | 13.1 | 74.2  | 56079 | $1.96 \cdot 10^{-4}$ | 0.00 | $3.07 \cdot 10^{-1}$ | $6.06 \cdot 10^{-4}$ | $2.32 \cdot 10^{-4}$ | $7.93 \cdot 10^{-4}$ | 71.1% | 0.07% | 0.03% | 0.11% | 0.00% | 0.05% |
| 45 | 80.8  | Included | 14.3 | 12.8 | 72.0  | 64803 | $2.78 \cdot 10^{-4}$ | 0.00 | $3.08 \cdot 10^{-1}$ | $6.94 \cdot 10^{-4}$ | $1.70 \cdot 10^{-4}$ | $6.29 \cdot 10^{-4}$ | 71.5% | 0.08% | 0.02% | 0.09% | 0.00% | 0.07% |
| 46 | 78.7  | Included | 13.9 | 12.4 | 69.9  | 67277 | $2.97 \cdot 10^{-4}$ | 0.00 | $3.11 \cdot 10^{-1}$ | $6.54 \cdot 10^{-4}$ | $2.82 \cdot 10^{-4}$ | $1.27 \cdot 10^{-4}$ | 72.1% | 0.08% | 0.03% | 0.17% | 0.00% | 0.07% |
| 47 | 76.6  | Included | 13.6 | 12.0 | 67.8  | 81147 | 0.00                 | 0.00 | $3.10 \cdot 10^{-1}$ | $6.28 \cdot 10^{-4}$ | $2.46 \cdot 10^{-4}$ | $8.67 \cdot 10^{-4}$ | 72.0% | 0.07% | 0.03% | 0.12% | 0.00% | 0.00% |
| 48 | 74.4  | Included | 13.2 | 11.6 | 65.7  | 58959 | $4.41 \cdot 10^{-4}$ | 0.00 | $3.15 \cdot 10^{-1}$ | $6.95 \cdot 10^{-4}$ | $1.70 \cdot 10^{-4}$ | $1.32 \cdot 10^{-3}$ | 73.2% | 0.08% | 0.02% | 0.18% | 0.00% | 0.10% |
| 49 | 72.3  | Included | 12.8 | 11.3 | 63.6  | 58283 | $3.26 \cdot 10^{-4}$ | 0.00 | $3.08 \cdot 10^{-1}$ | $6.18 \cdot 10^{-4}$ | $2.57 \cdot 10^{-4}$ | $1.14 \cdot 10^{-3}$ | 71.6% | 0.07% | 0.03% | 0.16% | 0.00% | 0.08% |
| 50 | 70.2  | Included | 12.4 | 10.9 | 61.4  | 62280 | 0.00                 | 0.00 | $3.05 \cdot 10^{-1}$ | $7.23 \cdot 10^{-4}$ | $2.41 \cdot 10^{-4}$ | $1.67 \cdot 10^{-3}$ | 70.9% | 0.08% | 0.03% | 0.23% | 0.00% | 0.00% |
| 51 | 68.1  | Included | 12.1 | 10.5 | 59.3  | 80477 | 0.00                 | 0.00 | $3.10 \cdot 10^{-1}$ | $8.08 \cdot 10^{-4}$ | $1.99 \cdot 10^{-4}$ | $1.61 \cdot 10^{-3}$ | 71.9% | 0.09% | 0.02% | 0.22% | 0.00% | 0.00% |

|    |      |          |      |      |      |       |                      |      |                      |                      |                      |                      |       |       |       |       |       |       |
|----|------|----------|------|------|------|-------|----------------------|------|----------------------|----------------------|----------------------|----------------------|-------|-------|-------|-------|-------|-------|
| 52 | 66.0 | Included | 11.7 | 10.1 | 57.2 | 60512 | 0.00                 | 0.00 | $3.05 \cdot 10^{-1}$ | $7.60 \cdot 10^{-4}$ | $2.31 \cdot 10^{-4}$ | $2.02 \cdot 10^{-3}$ | 70.8% | 0.09% | 0.03% | 0.28% | 0.00% | 0.00% |
| 53 | 63.8 | Included | 11.3 | 9.8  | 55.1 | 57071 | 0.00                 | 0.00 | $3.11 \cdot 10^{-1}$ | $8.94 \cdot 10^{-4}$ | $2.98 \cdot 10^{-4}$ | $2.01 \cdot 10^{-3}$ | 72.2% | 0.10% | 0.03% | 0.27% | 0.00% | 0.00% |
| 54 | 61.7 | Included | 10.9 | 9.4  | 53.0 | 62226 | $1.30 \cdot 10^{-3}$ | 0.00 | $3.10 \cdot 10^{-1}$ | $9.64 \cdot 10^{-4}$ | $2.57 \cdot 10^{-4}$ | $2.32 \cdot 10^{-3}$ | 72.0% | 0.11% | 0.03% | 0.32% | 0.00% | 0.31% |
| 55 | 59.6 | Included | 10.6 | 9.0  | 50.8 | 60427 | $1.62 \cdot 10^{-3}$ | 0.00 | $3.01 \cdot 10^{-1}$ | $8.27 \cdot 10^{-4}$ | $3.48 \cdot 10^{-4}$ | $3.43 \cdot 10^{-3}$ | 69.9% | 0.10% | 0.04% | 0.47% | 0.00% | 0.38% |
| 56 | 57.5 | Included | 10.2 | 8.6  | 48.7 | 64017 | $1.95 \cdot 10^{-3}$ | 0.00 | $3.01 \cdot 10^{-1}$ | $8.44 \cdot 10^{-4}$ | $3.44 \cdot 10^{-4}$ | $4.11 \cdot 10^{-3}$ | 69.9% | 0.10% | 0.04% | 0.56% | 0.00% | 0.46% |
| 57 | 55.4 | Included | 9.8  | 8.3  | 46.6 | 71509 | $2.62 \cdot 10^{-3}$ | 0.00 | $3.17 \cdot 10^{-1}$ | $9.37 \cdot 10^{-4}$ | $3.22 \cdot 10^{-4}$ | $4.51 \cdot 10^{-3}$ | 73.7% | 0.11% | 0.04% | 0.61% | 0.00% | 0.62% |
| 58 | 53.2 | Included | 9.4  | 7.9  | 44.5 | 57704 | $2.93 \cdot 10^{-3}$ | 0.00 | $3.03 \cdot 10^{-1}$ | $1.02 \cdot 10^{-3}$ | $3.29 \cdot 10^{-4}$ | $6.48 \cdot 10^{-3}$ | 70.3% | 0.12% | 0.04% | 0.88% | 0.00% | 0.69% |
| 59 | 51.1 | Included | 9.1  | 7.5  | 42.4 | 70682 | $4.06 \cdot 10^{-3}$ | 0.00 | $3.11 \cdot 10^{-1}$ | $9.76 \cdot 10^{-4}$ | $3.96 \cdot 10^{-4}$ | $5.14 \cdot 10^{-3}$ | 72.2% | 0.11% | 0.05% | 0.70% | 0.00% | 0.96% |
| 60 | 49.0 | Included | 8.7  | 7.1  | 40.3 | 59161 | $4.60 \cdot 10^{-3}$ | 0.00 | $2.94 \cdot 10^{-1}$ | $1.01 \cdot 10^{-3}$ | $4.39 \cdot 10^{-4}$ | $8.39 \cdot 10^{-3}$ | 68.2% | 0.12% | 0.05% | 1.14% | 0.00% | 1.08% |
| 61 | 46.9 | Included | 8.3  | 6.8  | 38.1 | 59526 | $5.86 \cdot 10^{-3}$ | 0.00 | $3.00 \cdot 10^{-1}$ | $9.91 \cdot 10^{-4}$ | $4.20 \cdot 10^{-4}$ | $8.15 \cdot 10^{-3}$ | 69.7% | 0.12% | 0.05% | 1.11% | 0.00% | 1.38% |
| 62 | 44.8 | Included | 7.9  | 6.4  | 36.0 | 65005 | $7.60 \cdot 10^{-3}$ | 0.00 | $3.00 \cdot 10^{-1}$ | $1.06 \cdot 10^{-3}$ | $5.08 \cdot 10^{-4}$ | $9.00 \cdot 10^{-3}$ | 69.7% | 0.12% | 0.06% | 1.23% | 0.00% | 1.79% |
| 63 | 42.7 | Included | 7.6  | 6.0  | 33.9 | 62437 | $9.21 \cdot 10^{-3}$ | 0.00 | $2.89 \cdot 10^{-1}$ | $1.11 \cdot 10^{-3}$ | $4.48 \cdot 10^{-4}$ | $1.10 \cdot 10^{-2}$ | 67.2% | 0.13% | 0.05% | 1.50% | 0.00% | 2.17% |
| 64 | 40.5 | Included | 7.2  | 5.6  | 31.8 | 61573 | $1.25 \cdot 10^{-2}$ | 0.00 | $2.92 \cdot 10^{-1}$ | $1.38 \cdot 10^{-3}$ | $6.17 \cdot 10^{-4}$ | $1.19 \cdot 10^{-2}$ | 67.7% | 0.16% | 0.07% | 1.62% | 0.00% | 2.94% |
| 65 | 38.4 | Included | 6.8  | 5.3  | 29.7 | 51401 | $1.44 \cdot 10^{-2}$ | 0.00 | $2.79 \cdot 10^{-1}$ | $1.23 \cdot 10^{-3}$ | $4.47 \cdot 10^{-4}$ | $1.55 \cdot 10^{-2}$ | 64.9% | 0.14% | 0.05% | 2.11% | 0.00% | 3.39% |
| 66 | 36.3 | Included | 6.4  | 4.9  | 27.5 | 86531 | $2.08 \cdot 10^{-2}$ | 0.00 | $2.86 \cdot 10^{-1}$ | $1.20 \cdot 10^{-3}$ | $5.08 \cdot 10^{-4}$ | $9.50 \cdot 10^{-3}$ | 66.3% | 0.14% | 0.06% | 1.29% | 0.00% | 4.89% |
| 67 | 34.2 | Included | 6.1  | 4.5  | 25.4 | 70681 | $2.20 \cdot 10^{-2}$ | 0.00 | $2.73 \cdot 10^{-1}$ | $1.22 \cdot 10^{-3}$ | $5.09 \cdot 10^{-4}$ | $1.99 \cdot 10^{-2}$ | 63.3% | 0.14% | 0.06% | 2.71% | 0.00% | 5.18% |
| 68 | 32.1 | Included | 5.7  | 4.1  | 23.3 | 56958 | $3.46 \cdot 10^{-2}$ | 0.00 | $2.62 \cdot 10^{-1}$ | $1.32 \cdot 10^{-3}$ | $6.14 \cdot 10^{-4}$ | $2.23 \cdot 10^{-2}$ | 60.8% | 0.15% | 0.07% | 3.04% | 0.00% | 8.15% |
| 69 | 29.9 | Included | 5.3  | 3.8  | 21.2 | 58426 | $5.43 \cdot 10^{-2}$ | 0.00 | $2.55 \cdot 10^{-1}$ | $1.39 \cdot 10^{-3}$ | $5.82 \cdot 10^{-4}$ | $1.81 \cdot 10^{-2}$ | 59.2% | 0.16% | 0.07% | 2.46% | 0.00% | 12.8% |
| 70 | 27.8 | Included | 4.9  | 3.4  | 19.1 | 68658 | $7.39 \cdot 10^{-2}$ | 0.00 | $2.44 \cdot 10^{-1}$ | $1.46 \cdot 10^{-3}$ | $7.87 \cdot 10^{-4}$ | $1.65 \cdot 10^{-2}$ | 56.5% | 0.17% | 0.09% | 2.24% | 0.00% | 17.4% |
| 71 | 25.7 | Included | 4.6  | 3.0  | 16.9 | 69135 | $9.40 \cdot 10^{-2}$ | 0.00 | $2.39 \cdot 10^{-1}$ | $1.35 \cdot 10^{-3}$ | $7.38 \cdot 10^{-4}$ | $1.96 \cdot 10^{-2}$ | 55.4% | 0.16% | 0.09% | 2.66% | 0.00% | 22.2% |
| 72 | 23.6 | Included | 4.2  | 2.6  | 14.8 | 62923 | $1.07 \cdot 10^{-1}$ | 0.00 | $2.33 \cdot 10^{-1}$ | $1.35 \cdot 10^{-3}$ | $7.63 \cdot 10^{-4}$ | $2.21 \cdot 10^{-2}$ | 54.0% | 0.16% | 0.09% | 3.01% | 0.00% | 25.2% |
| 73 | 21.5 | Included | 3.8  | 2.3  | 12.7 | 58949 | $1.28 \cdot 10^{-1}$ | 0.00 | $2.21 \cdot 10^{-1}$ | $1.46 \cdot 10^{-3}$ | $7.29 \cdot 10^{-4}$ | $2.06 \cdot 10^{-2}$ | 51.4% | 0.17% | 0.08% | 2.81% | 0.00% | 30.2% |
| 74 | 19.4 | Included | 3.4  | 1.9  | 10.6 | 61667 | $1.52 \cdot 10^{-1}$ | 0.00 | $2.10 \cdot 10^{-1}$ | $1.49 \cdot 10^{-3}$ | $7.30 \cdot 10^{-4}$ | $1.84 \cdot 10^{-2}$ | 48.7% | 0.17% | 0.08% | 2.51% | 0.00% | 35.9% |
| 75 | 17.2 | Included | 3.1  | 1.5  | 8.5  | 62563 | $1.77 \cdot 10^{-1}$ | 0.00 | $1.94 \cdot 10^{-1}$ | $1.41 \cdot 10^{-3}$ | $6.23 \cdot 10^{-4}$ | $1.76 \cdot 10^{-2}$ | 45.1% | 0.16% | 0.07% | 2.40% | 0.00% | 41.8% |
| 76 | 15.1 | Included | 2.7  | 1.1  | 6.4  | 63191 | $2.06 \cdot 10^{-1}$ | 0.00 | $1.77 \cdot 10^{-1}$ | $1.41 \cdot 10^{-3}$ | $7.44 \cdot 10^{-4}$ | $1.71 \cdot 10^{-2}$ | 41.2% | 0.16% | 0.09% | 2.33% | 0.00% | 48.6% |
| 77 | 13.0 | Included | 2.3  | 0.8  | 4.2  | 64532 | $2.40 \cdot 10^{-1}$ | 0.00 | $1.60 \cdot 10^{-1}$ | $1.32 \cdot 10^{-3}$ | $7.59 \cdot 10^{-4}$ | $1.58 \cdot 10^{-2}$ | 37.2% | 0.15% | 0.09% | 2.15% | 0.00% | 56.6% |
| 78 | 10.9 | Included | 1.9  | 0.4  | 2.1  | 71089 | $2.74 \cdot 10^{-1}$ | 0.00 | $1.38 \cdot 10^{-1}$ | $1.27 \cdot 10^{-3}$ | $6.75 \cdot 10^{-4}$ | $1.32 \cdot 10^{-2}$ | 32.0% | 0.15% | 0.08% | 1.80% | 0.00% | 64.6% |
| 79 | 8.8  | Included | 1.6  | 0.0  | 0.0  | 71984 | $3.16 \cdot 10^{-1}$ | 0.00 | $1.18 \cdot 10^{-1}$ | $1.19 \cdot 10^{-3}$ | $5.83 \cdot 10^{-4}$ | $1.28 \cdot 10^{-2}$ | 27.5% | 0.14% | 0.07% | 1.75% | 0.00% | 74.6% |
| 80 | 6.6  | Excluded | 1.2  | -    | -    | -     | -                    | -    | -                    | -                    | -                    | -                    | -     | -     | -     | -     | -     | -     |
| 81 | 4.5  | Excluded | 0.8  | -    | -    | -     | -                    | -    | -                    | -                    | -                    | -                    | -     | -     | -     | -     | -     | -     |

|    |     |          |     |   |   |   |   |   |   |   |   |   |   |   |   |   |   |   |
|----|-----|----------|-----|---|---|---|---|---|---|---|---|---|---|---|---|---|---|---|
| 82 | 2.4 | Excluded | 0.4 | - | - | - | - | - | - | - | - | - | - | - | - | - | - | - |
| 83 | 0.3 | Excluded | 0.1 | - | - | - | - | - | - | - | - | - | - | - | - | - | - | - |

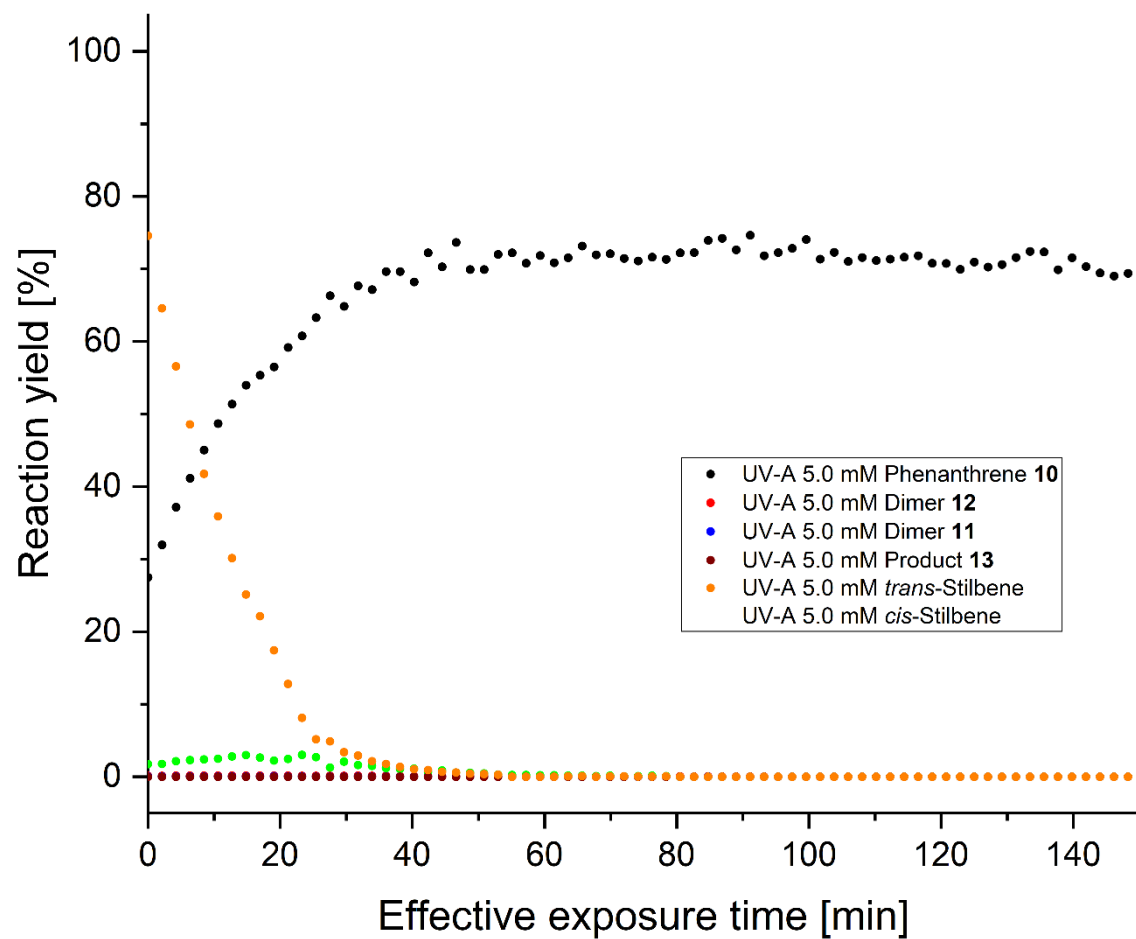

Figure S 21. Results of Switch-Off optimisation of Mallory photoreaction using UV-C light and 50.0 mM stilbene concentration. Top: Reaction components GC areas, conversion, and yield plotted against uncorrected residence time. Bottom: Reaction components GC areas, conversion, and yield plotted against exposure time, corrected for light inhomogeneity.

### 2. 4. 3. Validation of Switch-Off results obtained in Mallory photocyclisation of *cis*-stilbene

Two validation experiments were performed, first utilizing UV-A light source and 5.0 mM concentration of *cis*-stilbene and second utilizing UV-A light source and 50.0 mM *cis*-stilbene concentration with optimum effective exposure times of 24 minutes and 50 minutes, respectively, obtained from the switch-off optimisation experiments. Additionally to validation, second experiment utilising 50.0 mM *cis*-stilbene concentration was performed in order to isolate and fully characterise the reaction products **10**, **11**, **12**, and **13**.

#### 2. 4. 3. 1. Irradiation over 24 minutes of effective exposure time under UV-A light and 5.0 mM *cis*-stilbene concentration

*Cis*-stilbene (50.6 mg, 50.0  $\mu$ L, 0.28 mmol, 1.00 eq.) and iodine (7.1 mg, 0.03 mmol, 0.10 eq.) were dissolved in cyclohexane (50.0 mL, 988.1 vol.) and the solution was saturated with oxygen. The mixture was then injected into photoreactor (internal volume of 31.8 mL, 1.00 mm I.D., 1.60 mm O.D., PFA) equipped with UV-A lamp (Philips PLL 36W). Irradiation over 24 minutes of effective exposure time was set (corresponding to 1.06 mL/min). After injection of 50.0 mL, reaction mixture was eluted from photoreactor using pure cyclohexane, obtained crude mixture was then washed with a saturated solution of sodium thiosulfate (20 mL), water (20 mL) and brine (2x20 mL). The organic layer was then dried over  $MgSO_4$ , filtered and the solvent was evaporated under reduced pressure to afford the desired phenanthrene (48.0 mg, 0.27 mmol, 96.4% yield) as a white solid. NMR data was consistent with literature.<sup>2</sup>

#### 2. 4. 3. 2. Irradiation over 50 minutes of effective exposure time under UV-A light and 50.0 mM *cis*-stilbene concentration

*Cis*-stilbene (721.0 mg, 4.00 mmol, 1.00 eq., 50.0 mM solution) and iodine (101.6 mg, 0.40 mmol, 0.10 eq., 5.0 mM solution) were dissolved in cyclohexane (80.0 mL, 111.0 vol.) and then the mixture was injected into photoreactor (internal volume of 31.8 mL, 1.00 mm I.D., 1.60 mm O.D., PFA) equipped with UV-A lamp (Philips PLL 36W). Irradiation over 50 minutes of effective exposure time was set (corresponding to 0.606 mL/min flow rate). After injection of 80.0 mL, reaction mixture was eluted from photoreactor using pure cyclohexane, reaction mixture was then collected, solvent was removed, and obtained residue was initially purified using column chromatography ( $SiO_2$ ; *n*-hexane:AcOEt 9:1) affording fractions containing recovered *cis*-stilbene (371.9 mg, 2.06 mmol, recovery of 51.6% of starting material), phenanthrene **10** (71.2 mg, 0.40 mmol, 10.0% yield, NMR data was consistent with literature<sup>2</sup>) and combined fraction containing 1,2,3,4-tetraphenylcyclobutane isomers **11** and **12** and 1,2-diphenyl-1,2,2a,10b-tetrahydrocyclobuta[*l*]phenanthrene **13** (total mass of 263.6 mg). The latter was then repurified using preparative HPLC system (Cosmosil Buckyprep column, *n*-hexane:AcOEt 9:1) and afforded fractions containing (1 $\alpha$ ,2 $\alpha$ ,3 $\beta$ ,4 $\beta$ )-1,2,3,4-tetraphenylcyclobutane **11** and (1 $\alpha$ ,2 $\beta$ ,3 $\alpha$ ,4 $\beta$ )-1,2,3,4-tetraphenylcyclobutane **12** as white solids (total mass of 121.9 mg, 0.34 mmol, 8.5% yield), and fraction containing pure 1,2-diphenyl-1,2,2a,10b-tetrahydrocyclobuta[*l*]phenanthrene **13** as yellow solid (124.7 mg, 0.35 mmol, 8.7% yield).

Full characterisation data of the compounds **10**, **11**, **12**, and **13** can be found in section 3. 3. Procedure for synthesis of compounds 10, 11, 12, and 13: of this document.

### 3. Syntheses and characterization data

#### 3. 1. Procedures for synthesis of compounds 1, 2, 3, and 4:

##### 3. 1. 1. *cis*-7,8-Diphenyl-2-oxabicyclo[4.2.0]oct-7-ene (1):

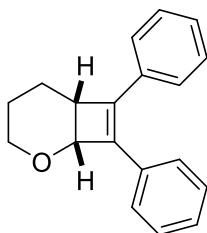

C<sub>19</sub>H<sub>18</sub>O  
MW: 262.352  
CAS 15895-76-8

Diphenylacetylene (1.51 g, 8.47 mmol, 0.056 M solution) was dissolved in 3,4-dihydro-2*H*-pyran (150.0 mL, 100.0 vol.) and the mixture was injected into photoreactor (internal volume of 31.8 mL, 1.00 mm I.D., 1.60 mm O.D., PFA) equipped with UV-C lamp (DuraBulb 36W UV-C 253.7 nm). Irradiation over 43 minutes of effective exposure time was set (corresponding to 0.670 mL/min). After injection of 145.0 mL, reaction mixture was eluted from photoreactor using pure 3,4-dihydro-2*H*-pyran, reaction mixture was then collected, solvent was removed, and obtained material was initially purified by flash chromatography (SiO<sub>2</sub>; *n*-hexane:AcOEt 9:1), and then by automated column chromatography system (Biotage Selekt, Biotage HP-Sphere 25 micron). Fractions containing product were combined, solvent was removed, remaining residue was dried *in vacuo*, and 7,8-diphenyl-2-oxabicyclo[4.2.0]oct-7-ene was obtained as slightly yellow, dense oil, which was further purified by vacuum distillation (230 °C at 4.0 mbar) (1.521 g, 5.80 mmol, 70.8% yield). Upon prolonged time the product crystallised to give slightly yellow solid. NMR data was consistent with literature.<sup>1</sup>

R<sub>f</sub> = 0.49 (*n*-hexane:AcOEt 9:1). GC R<sub>t</sub> = 7.80 min. Mp. 60.5 – 61.8 °C. Lit. 56 – 58 °C.<sup>3</sup> <sup>1</sup>H NMR (400 MHz, CDCl<sub>3</sub>) δ (ppm) = 7.65 (m, 2H), 7.56 (m, 2H), 7.39 – 7.27 (m, 6H), 4.85 (d, J=4.5 Hz, 1H), 3.93 (ddd, J=11.2, 7.8, 5.9 Hz, 1H), 3.77 (ddd, J=11.2, 8.3, 6.2 Hz, 1H), 3.33 (ddd, J=6.1, 5.2, 4.5 Hz, 1H), 2.19 (dddd, J=13.5, 9.0, 6.1, 5.3 Hz, 1H), 2.00 (dddd, J=13.6, 7.3, 5.2, 5.2 Hz, 1H), 1.78 (m, 1H), 1.66 (m, 1H). <sup>13</sup>C NMR (101 MHz, CDCl<sub>3</sub>) δ (ppm) = 143.8 (C), 140.7 (C), 135.0 (C), 134.7 (C), 128.6 (2xCH), 128.5 (CH), 128.0 (CH), 127.0 (CH), 126.7 (CH), 70.7 (CH), 62.0 (CH<sub>2</sub>), 40.5 (CH), 23.1 (CH<sub>2</sub>), 20.4 (CH<sub>2</sub>). UV-Vis (MeCN) λ<sub>max</sub> (ε): 229 nm (16110 ± 80 M<sup>-1</sup>cm<sup>-1</sup>), 298 nm (12367 ± 13 M<sup>-1</sup>cm<sup>-1</sup>). LRMS (EI) m/z = 262.3 (M<sup>+</sup>), 247.2, 233.2, 215.2, 203.2, 191.2, 178.2, 152.2, 128.2, 102.1, 91.1, 77.1, 55.2. LRMS (ESI+) m/z = 263.3 (M + H<sup>+</sup>).

##### 3. 1. 2. 3,4-Dihydro-6,7-diphenyl-2*H*-oxocin (2):

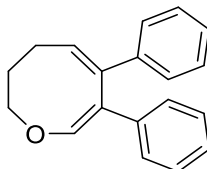

C<sub>19</sub>H<sub>18</sub>O  
MW: 262.352  
CAS 69321-82-0

7,8-Diphenyl-2-oxabicyclo[4.2.0]oct-7-ene (208.1 mg, 0.79 mmol, 3.81 mM solution) was dissolved in anhydrous acetonitrile (208.0 mL, 1000.0 vol.) and sonicated under high nitrogen flow for 15 minutes. The solution was then transferred to the jacketed photoreactor equipped with UV-B lamp (36 W, Philips PL-L 36W/09/4P) and set to 25 °C. Reaction mixture was then vigorously stirred for 30 minutes while passing high flow of nitrogen through the solution. After 30 minutes, the UV-B lamp was turned on and reaction mixture was irradiated for 20 hours. Solvent was then removed, obtained residue was preadsorbed onto silica and purified using automated chromatography system (Biotage Selekt,

Biotage HP-Sphere 25 micron). Fractions containing product were combined, solvent was removed, remaining residue was dried *in vacuo*, and 3,4-dihydro-6,7-diphenyl-2*H*-oxocin was obtained as a white solid (8.6 mg, 0.03 mmol, 3.8% yield). NMR data was consistent with literature.<sup>1</sup>

**R<sub>f</sub>** = 0.52 (*n*-hexane:AcOEt 9:1). **GC R<sub>t</sub>** = 7.59 min. **<sup>1</sup>H NMR (400 MHz, CDCl<sub>3</sub>) δ (ppm)** = 7.31 (m, 2H), 7.19 – 6.99 (m, 8H), 6.80 (s, 1H), 6.12 (t, J = 8.2 Hz, 1H), 4.62 (br s, 1H), 3.84 (br s, 1H), 2.70 (br s, 1H), 2.57 (br s, 1H), 1.93 (br s, 1H), 1.44 (br s, 1H). **<sup>13</sup>C NMR (101 MHz, CDCl<sub>3</sub>) δ (ppm)** = 147.7 (CH), 141.2 (C), 140.4 (C), 139.9 (C), 129.4 (CH), 128.2 (C), 128.2 (CH), 128.2 (CH), 127.5 (CH), 127.3 (CH), 126.7 (CH), 126.1 (CH), 66.6 (CH<sub>2</sub>), 26.1 (CH<sub>2</sub>), 23.8 (CH<sub>2</sub>). **LRMS (EI) m/z** = 262.3 (M<sup>+</sup>), 247.2, 133.2, 215.2, 203.2, 191.2, 178.1, 165.1, 152.1, 141.1, 128.1, 115.1, 105.1, 91.1, 77.1, 63.1, 51.1. **HRMS (EI) m/z** = 262.1351 (M<sup>+</sup>), 247.1120, 233.0961, 215.0855, 203.0853, 191.0853, 178.0777, 165.0699, 152.0619, 128.0620, 115.0543, 101.0386, 91.0542, 77.0386; calculated for: C<sub>19</sub>H<sub>18</sub>O 262.1358, C<sub>18</sub>H<sub>15</sub>O 247.1123, C<sub>17</sub>H<sub>13</sub>O 233.0966, C<sub>17</sub>H<sub>11</sub> 215.0861, C<sub>16</sub>H<sub>11</sub> 203.0861, C<sub>15</sub>H<sub>11</sub> 191.0861, C<sub>14</sub>H<sub>10</sub> 178.0783, C<sub>13</sub>H<sub>9</sub> 165.0704, C<sub>12</sub>H<sub>8</sub> 152.0626, C<sub>10</sub>H<sub>8</sub> 128.0626, C<sub>9</sub>H<sub>7</sub> 115.0548, C<sub>8</sub>H<sub>5</sub> 101.0391, C<sub>7</sub>H<sub>7</sub> 91.0548, C<sub>6</sub>H<sub>5</sub> 77.0391.

### 3. 1. 3. *cis*-8*c*,11,12,12*a*-Tetrahydro-10*H*-phenanthro[9',10':3,4]cyclobuta[1,2-*b*]pyran (3):

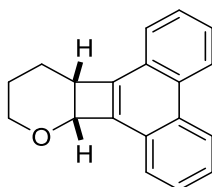

C<sub>19</sub>H<sub>16</sub>O  
MW: 260.336  
CAS 69321-81-9

7,8-Diphenyl-2-oxabicyclo[4.2.0]oct-7-ene (101.1 mg, 0.39 mmol, 1.90 mM solution) was dissolved in cyclohexane (202.0 mL, 2000.0 vol.) through which air was constantly bubbled. Mixture was poured into jacketed photoreactor set at 30 °C, equipped with UV-B light source (36W, Philips PL-L 36W/09/4P lamp) and was vigorously stirred for 16 hours while irradiated. Solvent was then removed from reaction mixture, and obtained residue was preadsorbed onto silica, and purified using automated chromatography system (Biotage Selekt, Biotage HP-Sphere 25 micron). 8*c*,11,12,12*a*-Tetrahydro-10*H*-phenanthro[9',10':3,4]cyclobuta[1,2-*b*]pyran was obtained as a white solid (26.2 mg, 0.10 mmol, 25.6% yield). NMR data was consistent with literature.<sup>1</sup>

**R<sub>f</sub>** = 0.47 (*n*-hexane:AcOEt 9:1). **GC R<sub>t</sub>** = 8.76 min. **Mp.** = 153.7 – 154.0 °C. Lit. 161 °C.<sup>1</sup> **<sup>1</sup>H NMR (400 MHz, CDCl<sub>3</sub>) δ (ppm)** = 8.80 – 8.71 (m, 2H), 7.97 (m, 1H), 7.81 (ddd, J=7.5, 1.7, 0.6 Hz, 1H) 7.70 – 7.59 (m, 4H), 5.45 (d, J=4.3 Hz, 1H), 4.04 (dt, J=6.0, 4.5 Hz, 1H), 3.91 – 3.78 (m, 2H), 2.37 (dddd, J=13.7, 10.2, 6.0, 5.3 Hz, 1H), 2.22 (dddd, J=13.7, 6.2, 5.3, 4.6 Hz, 1H), 1.64 (m, 1H), 1.40 (m, 1H). **<sup>13</sup>C NMR (101 MHz, CDCl<sub>3</sub>) δ (ppm)** = 143.3 (C), 141.1 (C), 132.1 (C), 130.8 (C), 129.0 (C), 128.6 (C), 127.3 (CH), 126.9 (CH), 126.8 (CH), 126.2 (CH), 124.1 (CH), 123.9 (CH), 123.7 (CH), 123.6 (CH), 72.9 (CH), 62.1 (CH<sub>2</sub>), 42.4 (CH), 23.2 (CH<sub>2</sub>), 20.0 (CH<sub>2</sub>). **LRMS (EI) m/z** = 260.2 (M<sup>+</sup>), 231.2, 215.2, 203.2, 189.2, 176.1, 165.1, 115.6, 101.3, 94.7, 75.1. **HRMS (EI) m/z** = 260.1194 (M<sup>+</sup>), 231.0806, 215.0857, 203.0852, 189.0700, 165.0699, 150.0463, 115.5398, 101.0389; calculated for C<sub>19</sub>H<sub>16</sub>O 260.1201, C<sub>17</sub>H<sub>11</sub>O 231.0810, C<sub>17</sub>H<sub>11</sub> 215.0816, C<sub>16</sub>H<sub>11</sub> 203.0861, C<sub>15</sub>H<sub>9</sub> 189.0704, C<sub>13</sub>H<sub>9</sub> 165.0704, C<sub>12</sub>H<sub>6</sub> 150.0470, C<sub>8</sub>H<sub>5</sub> 101.0391.



### 3. 1. 4. (5 $\alpha$ ,6 $\beta$ ,7 $\alpha$ ,12 $\alpha$ ,13 $\beta$ ,14 $\alpha$ )-1,11-Dioxa-6,13-diphenyltetracyclo[6.6.0.0<sup>5,14</sup>,0<sup>7,12</sup>]tetradecane (4):

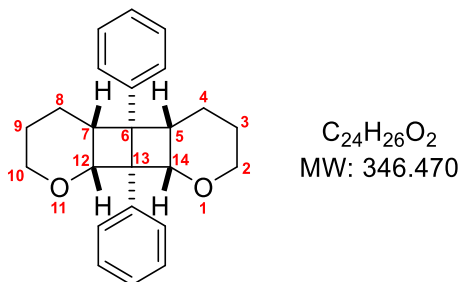

7,8-Diphenyl-2-oxabicyclo[4.2.0]oct-7-ene (0.131 g, 0.50 mmol, 55.5 mM solution) was dissolved in 3,4-dihydro-2*H*-pyran (9.0 mL, 68.7 vol.) and the mixture was injected into photoreactor (internal volume of 31.8 mL, 1.00 mm I.D., 1.60 mm O.D., PFA) equipped with UV-B lamp (Philips PL-L 36W/01/4P). Effective exposure time of 288 minutes was set (corresponding to 0.100 mL/min total flow rate). After injection, reaction mixture was eluted from photoreactor using pure 3,4-dihydro-2*H*-pyran, reaction mixture was then collected, solvent was removed, and crude was purified by flash chromatography (SiO<sub>2</sub>; toluene:AcOEt 9:1). Fractions containing product were combined, solvent was removed, remaining residue was dried *in vacuo*, and desired product was obtained as colourless oil (0.037 g, 0.11 mmol, 21.4% yield).

$R_f$  = 0.43 (*n*-hexane:AcOEt 9:1). GC  $R_t$  = 10.49 min.  $^1H$  NMR (400 MHz, CDCl<sub>3</sub>)  $\delta$  (ppm) = 7.31 – 7.15 (m, 10H), 4.55 (d, *J*=5.4 Hz, 2H), 3.48 (ddd, *J*=11.1, 5.7, 5.7 Hz, 2H), 3.26 (ddd, *J*=11.1, 7.6, 4.8 Hz, 2H), 2.75 (ddd, *J*=7.5, 7.5, 5.3 Hz, 2H), 1.69 (m, 2H), 1.43 – 1.15 (m, 6H).  $^{13}C$  NMR (101 MHz, CDCl<sub>3</sub>)  $\delta$  (ppm) = 138.8 (C), 136.6 (C), 129.7 (CH), 127.4 (CH), 127.2 (CH), 126.0 (CH), 125.9 (CH), 75.1 (CH), 64.1 (C), 63.3 (CH<sub>2</sub>), 59.4 (C), 42.8 (CH), 21.5 (CH<sub>2</sub>), 20.5 (CH<sub>2</sub>).  $^1H$  NMR (500 MHz, 373 K, DMSO-*d*<sub>6</sub>)  $\delta$  (ppm) = 7.28 (m, 2H), 7.22 – 7.17 (m, 5H), 7.16 – 7.10 (m, 3H), 4.50 (d, *J*=5.4 Hz, 2H), 3.40 (ddd, *J*=11.2, 6.6, 5.8 Hz, 2H), 3.24 (ddd, *J*=11.1, 7.4, 5.0 Hz, 2H), 2.80 (ddd, *J*=7.9, 7.8, 5.5 Hz, 2H), 1.66 (m, 2H), 1.39 – 1.30 (m, 2H), 1.26 – 1.16 (m, 4H).  $^{13}C$  NMR (126 MHz, 353 K, DMSO-*d*<sub>6</sub>)  $\delta$  (ppm) = 138.2, 136.3, 129.2, 126.5, 126.2, 125.2, 124.7, 74.0, 63.1, 61.7, 58.6, 41.8, 20.4, 19.3. FT-ATR-IR  $\nu$  (cm<sup>-1</sup>) = 3059, 3025, 2949, 2920, 2845, 1602, 1495, 1445, 1178, 1129, 1088, 1062, 1033, 951, 911, 761, 734, 702, 648, 577. HRMS (ESI+) *m/z*: 369.1821 [M + Na<sup>+</sup>], 715.3730 [2M + Na<sup>+</sup>], calculated for C<sub>24</sub>H<sub>26</sub>O<sub>2</sub>Na<sup>+</sup> 369.1825, for C<sub>48</sub>H<sub>52</sub>O<sub>4</sub>Na<sup>+</sup> 715.3758. HRMS (EI) *m/z* = 346.1933 (M<sup>+</sup>), 301.1584, 287.1437, 262.1347, 211.1114, 186.1041, 169.1012, 141.0703, 128.0623, 115.0546, 103.0547, 91.0544, 77.0388, 41.0388; calculated for C<sub>24</sub>H<sub>26</sub>O<sub>2</sub> 346.1933, C<sub>22</sub>H<sub>21</sub>O 301.1592, C<sub>21</sub>H<sub>19</sub>O 287.1436, C<sub>19</sub>H<sub>18</sub>O 262.1358, C<sub>15</sub>H<sub>15</sub>O 211.1123, C<sub>13</sub>H<sub>14</sub>O 186.1045, C<sub>13</sub>H<sub>13</sub> 169.1017, C<sub>11</sub>H<sub>9</sub> 141.0704, C<sub>10</sub>H<sub>8</sub> 128.0626, C<sub>9</sub>H<sub>7</sub> 115.0548, C<sub>8</sub>H<sub>7</sub> 103.0548, C<sub>7</sub>H<sub>7</sub> 91.0548, C<sub>6</sub>H<sub>5</sub> 77.0388, C<sub>3</sub>H<sub>5</sub> 41.0391.

7,8-Diphenyl-2-oxabicyclo[4.2.0]oct-7-ene **1** has two distinctive sites from which the reaction can occur, namely *endo* and *exo* faces, which are marked in the 3D model of molecule when looking at the plane of the cyclobutene ring (Figure S 22. 3D model of the 7,8-diphenyl-2-oxabicyclo[4.2.0]oct-7-ene **1** showing *endo* and *exo* faces of the molecule.).

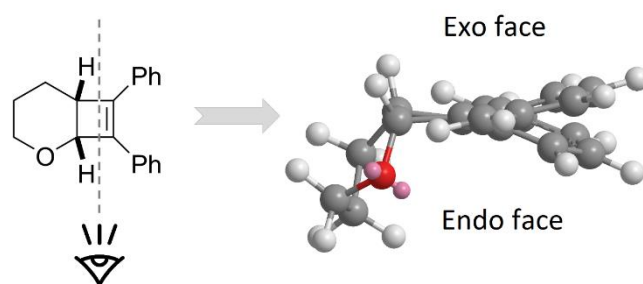

Figure S 22. 3D model of the 7,8-diphenyl-2-oxabicyclo[4.2.0]oct-7-ene **1** showing endo and exo faces of the molecule.

The 3,4-dihydro-2H-pyran can react with the **1** by *endo* or *exo* addition and depending on the geometry of pyran addition, it can afford head-to-head (HH) or head-to-tail (HT) products.

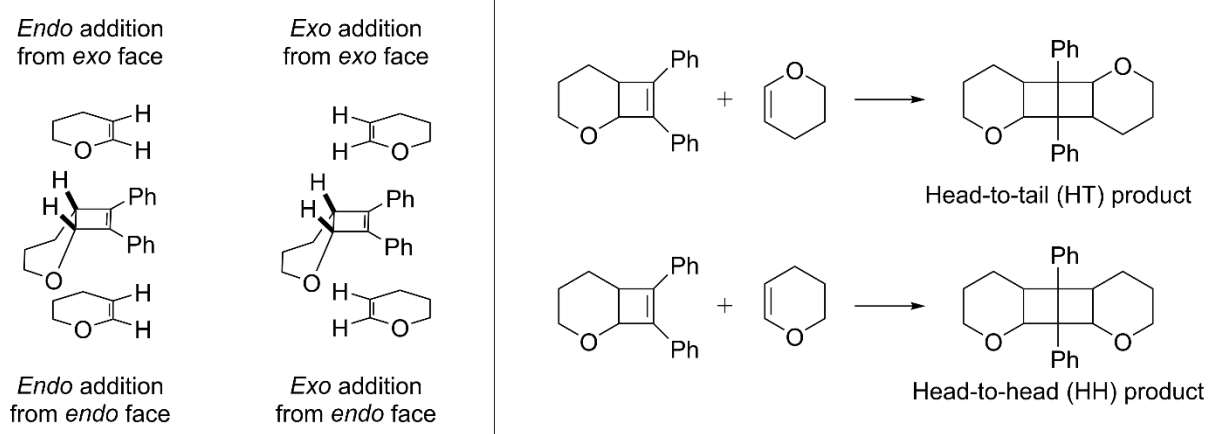

Figure S 23. Left. Examples of endo and exo additions of 3,4-dihydro-2H-pyran, from both endo and exo faces of **1**. Right: Reactions affording head-to-head and head-to-tail products.

Theoretically 8 different products can be obtained in the above-mentioned [2+2] photoreaction, however *exo* addition of 3,4-dihydro-2H-pyran at *endo* face of **1** and respective *endo* addition at *exo* face afford the same isomers, marked as **4.2** for head-to-tail and **4.5** for head-to-head additions, thus leaving only 6 possible isomers of **4** that can be formed in this particular [2+2] photocycloaddition.

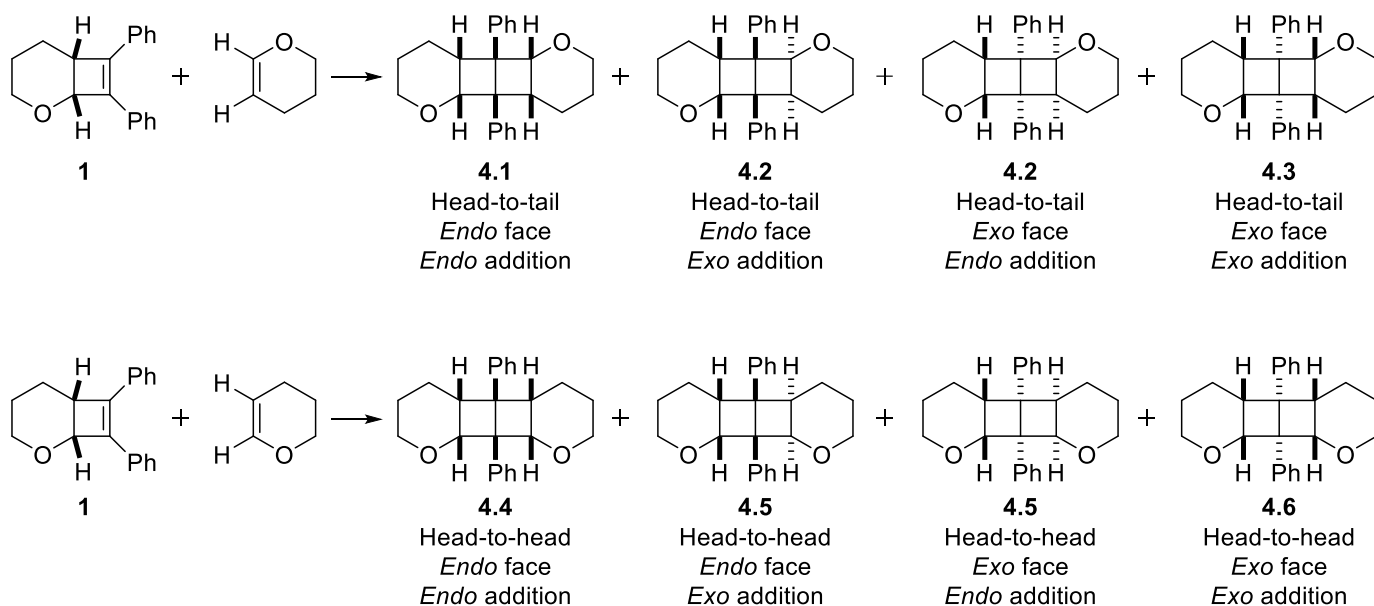

Scheme S 3. Theoretically plausible structures of the [2+2] photocycloaddition products between 7,8-diphenyl-2-oxabicyclo[4.2.0]oct-7-ene **1** and 3,4-dihydro-2H-pyran.

In the  $^{13}\text{C}$  NMR spectra of structures **4.1** and **4.3** only 4 aromatic signals should be visible, due to the C2 axis of symmetry, however experimental  $^{13}\text{C}$  NMR spectrum shows 7 aromatic signals (Figure S 42.  $^{13}\text{C}$  (top) and DEPT-135 (bottom) NMR spectrum of (5 $\alpha$ ,6 $\beta$ ,7 $\alpha$ ,12 $\alpha$ ,13 $\beta$ ,14 $\alpha$ )-1,11-Dioxa-6,13-diphenyltetracyclo[6.6.0.0<sup>5,14</sup>,0<sup>7,12</sup>]tetradecane (**4**) in  $\text{CDCl}_3$ .) thus **4.1** and **4.3** were dismissed as potential structures of the bis-addition product.

In the  $^{13}\text{C}$  NMR spectra of structures **4.2** and **4.5** signals originating from cyclobutane rings should be distinguishable, due to no symmetry elements (apart from identity element), so 6 signals would be expected, however only 4 are observed (Figure S 42.  $^{13}\text{C}$  (top) and DEPT-135 (bottom) NMR spectrum of (5 $\alpha$ ,6 $\beta$ ,7 $\alpha$ ,12 $\alpha$ ,13 $\beta$ ,14 $\alpha$ )-1,11-Dioxa-6,13-diphenyltetracyclo[6.6.0.0<sup>5,14</sup>,0<sup>7,12</sup>]tetradecane (**4**) in  $\text{CDCl}_3$ .), thus structures **4.2** and **4.5** were dismissed as potential structures of the bis-addition product.

Structure **4.4** can be formed in an *endo* addition of 3,4-dihydro-2H-pyran to the *endo* face of the **1** (Figure S 24. Endo [2+2] photocycloaddition of **1** and 3,4-dihydro-2H-pyran at the *endo* face of **1** affording **4.4**.), whereas structure **4.6** can be formed in an *exo* addition of the 3,4-dihydro-2H-pyran to the *exo* face of the **1** (Figure S 25. Exo [2+2] photocycloaddition of **1** and 3,4-dihydro-2H-pyran at the *exo* face of **1** affording **4.6**.), thus making the formation of **4.6** much more favourable.

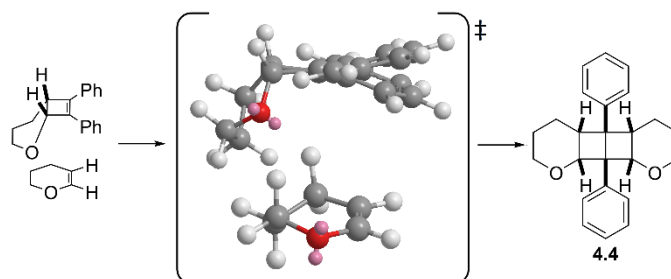

Figure S 24. Endo [2+2] photocycloaddition of **1** and 3,4-dihydro-2H-pyran at the *endo* face of **1** affording **4.4**.

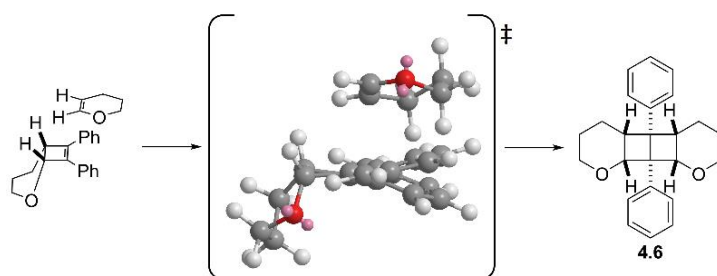

Figure S 25. Exo [2+2] photocycloaddition of **1** and 3,4-dihydro-2H-pyran at the exo face of **1** affording **4.6**.

Based on all evidence, the structure **4.6** was determined to be the most probable structure of the bis-addition product obtained in the [2+2] photocycloaddition of 7,8-diphenyl-2-oxabicyclo[4.2.0]oct-7-ene **1** with 3,4-dihydro-2H-pyran.

### 3. 2. Procedure for synthesis of compounds **5**, **6**, **7**, **8**, and **9**:

To a 250.0 mL round-bottom flask flushed with nitrogen, cyclohex-2-enone (536.5 mg, 532.4  $\mu$ L, 5.58 mmol, 1.0 eq., 25.4 mM solution), tetramethylethylene (9.2451 g, 13.0673 mL, 109.85 mmol, 19.7 eq., 499.3 mM solution), dibutyl ether (internal standard, 628.9 mg, 816.8  $\mu$ L, 4.83 mmol, 0.87 eq., 22.0 mM solution) and anhydrous acetonitrile (205.6 mL, 383.2 vol.) were added and resulting mixture was sonicated under high nitrogen flow for 15 minutes in order to remove oxygen from solution. Effective exposure time of 50 minutes was set (corresponding to 0.569 mL/min total flow rate) and mixture was injected into the photoreactor (31.8 mL internal volume, 1.00 mm ID, 1.60 mm OD, PFA) equipped with UV-A lamp (Philips PLL 36W). Once the 195.0 mL of the mixture was entirely injected, it was eluted using acetonitrile (anhydrous and deoxygenated) out of the flow system. After collection of reaction mixture, solvent was removed, obtained residue was purified by column chromatography ( $\text{SiO}_2$ ; toluene: $\text{Et}_2\text{O}$  100:0 to 75:25 then  $\text{Et}_2\text{O}$ , then pure  $\text{Et}_2\text{O}$ ) and then by automated column chromatography system (Biotage Selekt, Biotage HP-Sphere 25 micron).

#### 3. 2. 1. *trans*-7,7,8,8-Tetramethylbicyclo[4.2.0]octan-2-one (**5**):

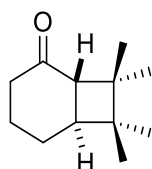

$\text{C}_{12}\text{H}_{20}\text{O}$   
MW: 180.291  
CAS 100675-56-7

Obtained as colourless oil (404.1 mg, 2.24 mmol, 45.3% yield). Compound reported in the literature (see <sup>4,5</sup>), but no spectral data was given.  $R_f = 0.52$  (toluene:diethyl ether 9:1). **GC**  $R_t = 3.59$  min.  **$^1\text{H NMR}$  (400 MHz,  $\text{CDCl}_3$ )  $\delta$  (ppm)** = 2.40 (d,  $J=13.4$  Hz, 1H), 2.18 – 2.11 (m, 2H), 2.11 – 2.00 (m, 2H), 1.77 (m, 1H), 1.65 (dddd,  $J=12.2, 5.0, 3.6, 2.6$  Hz, 1H), 1.46 (dddd,  $J=12.1, 11.7, 11.6, 4.8$  Hz, 1H), 1.17 (s, 3H), 1.00 (s, 3H), 0.90 (s, 3H), 0.88 (s, 3H).  **$^{13}\text{C NMR}$  (101 MHz,  $\text{CDCl}_3$ )  $\delta$  (ppm)** = 209.5 (C), 56.7 (CH), 51.5 (CH), 43.5 (C), 42.8 (C), 41.3 ( $\text{CH}_2$ ), 28.2 ( $\text{CH}_2$ ), 25.1 ( $\text{CH}_2$ ), 23.7 ( $\text{CH}_3$ ), 23.0 ( $\text{CH}_3$ ), 19.4 ( $\text{CH}_3$ ), 18.6 ( $\text{CH}_3$ ). **LRMS (EI)  $m/z$**  = 180.2 ( $\text{M}^+$ ), 165.2, 137.2, 124.2, 109.2, 98.2, 83.2, 67.1, 55.1, 41.1.

#### 3. 2. 2. *cis*-7,7,8,8-Tetramethylbicyclo[4.2.0]octan-2-one (**6**):

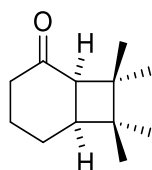

$\text{C}_{12}\text{H}_{20}\text{O}$   
MW: 180.291  
CAS 100675-57-8

Obtained as colourless oil (153.1 mg, 0.85 mmol, 17.2% yield). Compound reported in the literature (see <sup>4,5</sup>), but no spectral data was given.  $R_f = 0.49$  (toluene:diethyl ether 9:1). **GC**  $R_t = 3.71$  min. **<sup>1</sup>H NMR (400 MHz, CDCl<sub>3</sub>)  $\delta$  (ppm)** = 2.72 (d,  $J = 9.3$  Hz, 1H), 2.39 (dddd,  $J = 18.6, 5.1, 3.6, 1.9, 1.9$  Hz, 1H), 2.19 (ddd,  $J = 10.9, 9.4, 7.9$  Hz, 1H), 2.11 (ddd,  $J = 18.2, 12.4, 5.6$  Hz, 1H), 1.95 (m, 1H), 1.84 (m, 1H), 1.65 (m, 1H), 1.54 (m, 1H), 1.10 (s, 3H), 1.05 (s, 3H), 1.03 (s, 3H), 0.92 (s, 3H). **<sup>13</sup>C NMR (101 MHz, CDCl<sub>3</sub>)  $\delta$  (ppm)** = 214.4 (C), 50.7 (CH), 44.5 (C), 42.6 (CH), 41.4 (CH<sub>2</sub>), 39.8 (C), 27.3 (CH<sub>3</sub>), 26.4 (CH<sub>3</sub>), 24.1 (CH<sub>2</sub>), 23.1 (CH<sub>3</sub>), 22.0 (CH<sub>2</sub>), 19.2 (CH<sub>3</sub>). **LRMS (EI)  $m/z$**  = 180.2 (M<sup>+</sup>), 165.2, 137.2, 124.2, 111.2, 98.2, 83.2, 69.2, 55.2, 41.2.

### 3. 2. 3. Structural assignment of the *trans*- and *cis*-bicyclo[4.2.0]octan-2-ones **5** and **6**:

Stereochemistry of the *trans*-7,7,8,8-tetramethylbicyclo[4.2.0]octan-2-one (**5**) and *cis*-7,7,8,8-tetramethylbicyclo[4.2.0]octan-2-one (**6**) have been assigned on the basis of the vicinal coupling constants in the <sup>1</sup>H NMR spectra between hydrogens **1** and **6** (Scheme S 4.).

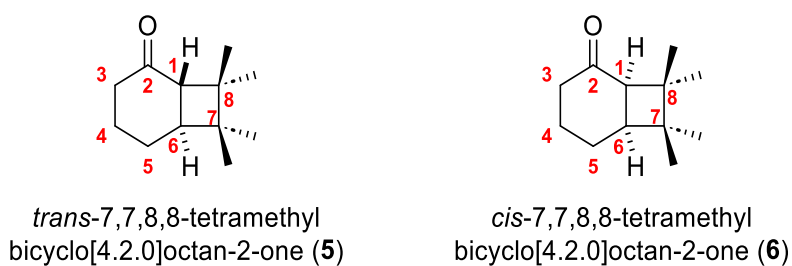

Scheme S 4. Structures and atom numbering of compounds **5** and **6**.

Theoretical calculations of the same vicinal coupling constants for both molecules **5** and **6** have been performed using following procedure<sup>6</sup>:

1. Molecule geometry was optimised with B3LYP/6-31G(d) method.<sup>7</sup>
2. NMR single-point calculation was run with B3LYP/6-31G(d,p) basis.
3. Calculated Fermi contact  $J$  values was scaled by a factor of 0.9155.<sup>6</sup>

Comparison of the theoretical and experimental values of the H**1**-H**6** coupling constant are in good agreement (Table S 17.).

Table S 17. Theoretical and experimental values of the coupling constant between hydrogens **1** and **6** in molecules **5** and **6**.

|                                                       | <i>trans</i> -7,7,8,8-Tetramethyl<br>bicyclo[4.2.0]octan-2-one ( <b>5</b> ) | <i>cis</i> -7,7,8,8-Tetramethyl<br>bicyclo[4.2.0]octan-2-one ( <b>6</b> ) |
|-------------------------------------------------------|-----------------------------------------------------------------------------|---------------------------------------------------------------------------|
| Theoretical <sup>3</sup> J <sub>H-H</sub> value [Hz]  | 13.07                                                                       | 9.02                                                                      |
| Experimental <sup>3</sup> J <sub>H-H</sub> value [Hz] | 13.35                                                                       | 9.32                                                                      |

Additionally, optimised geometries of the molecules **5** and **6** (Table S 18.) were used for determination of the dihedral angle between cyclobutane hydrogens and subsequent calculation of the coupling constant using Karplus-type relationships. A reverse calculation was also performed, in which cyclobutane hydrogens dihedral angles were calculated from experimental value of the coupling constants. All obtained values are in agreement with the structural assignment of molecules **5** and **6** made in this report.

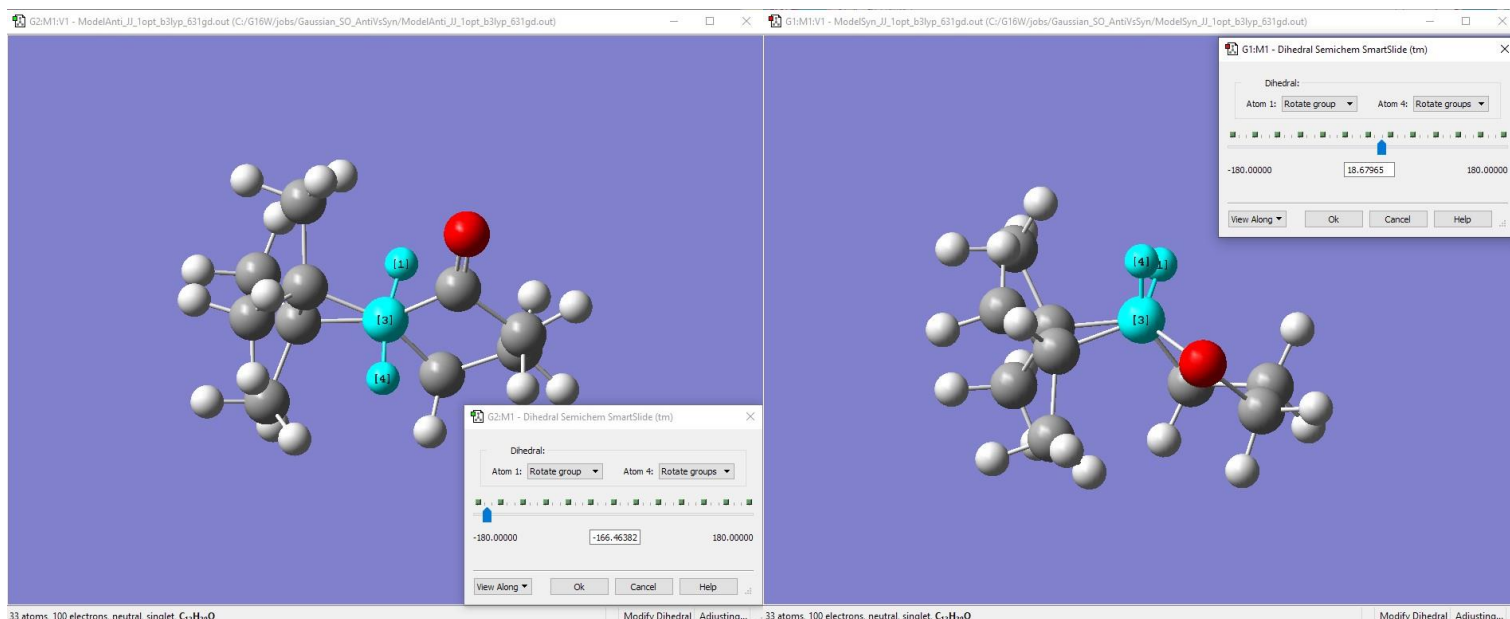

Figure S 26. Graphical presentation of the optimised (B3LYP/6-31G(d)) molecules **5** (left) and **6** (right) geometries along the C1-C6 axis, with indicated values of the dihedral angle between H1-C1-C6-H6.<sup>8</sup>

Table S 18. Calculated values of H1-C1-C6-H6 dihedral angles and H1-H6 vicinal coupling constants.

| Molecule                                                                  | Geometry optimisation method | Calculated dihedral angle (H1-C1-C6-H6) [°] | Calculated $^3J_{\text{H-H}}$ values <sup>a</sup> [Hz]     |                       |                                      | Experimental $^3J_{\text{H-H}}$ value obtained from $^1\text{H}$ NMR [Hz] | Calculated dihedral angle value from experimental $^3J_{\text{H-H}}$ coupling constant [°] |                                        |                                        |
|---------------------------------------------------------------------------|------------------------------|---------------------------------------------|------------------------------------------------------------|-----------------------|--------------------------------------|---------------------------------------------------------------------------|--------------------------------------------------------------------------------------------|----------------------------------------|----------------------------------------|
|                                                                           |                              |                                             | HLA with $\beta$ -substituent correction <sup>b,9,10</sup> | HLA <sup>c,9,10</sup> | DAD (cross terms) <sup>c,11,12</sup> |                                                                           | HLA with $\beta$ -substituent correction <sup>b,9,10</sup>                                 | HLA <sup>c,9,10</sup>                  | DAD (cross terms) <sup>d,11,12</sup>   |
| <i>trans</i> -7,7,8,8-Tetramethyl bicyclo[4.2.0] octan-2-one ( <b>5</b> ) | B3LYP/6-31G(d)               | 166.5                                       | 12.57                                                      | 11.33                 | 11.47                                | 13.35                                                                     | n/a <sup>e</sup>                                                                           | n/a <sup>e</sup>                       | 0.0/360.0<br><b>159.1</b><br>200.9     |
| <i>cis</i> -7,7,8,8-Tetramethyl bicyclo[4.2.0] octan-2-one ( <b>6</b> )   | B3LYP/6-31G(d)               | 18.7                                        | 10.16                                                      | 9.28                  | 8.98                                 | 9.32                                                                      | <b>24.1</b><br>146.2<br>213.2<br>335.3                                                     | <b>17.0</b><br>149.2<br>208.3<br>340.3 | <b>15.2</b><br>149.4<br>208.2<br>342.0 |

<sup>a</sup> – vicinal coupling constants and dihedral angles values were calculated using MestReJ software (MestReLab Research©)

<sup>b</sup> –  $\chi[\text{R}_1=\text{CHO}_2]=0.094$ ,  $\chi[\text{R}_2=\text{CC}_3]=0.172$ ,  $\chi[\text{R}_3=\text{CC}_3]=0.172$ ,  $\chi[\text{R}_4=\text{CH}_2\text{C}]=0.324$

<sup>c</sup> –  $\lambda[\text{R}_1=\text{C}(\text{O})\text{R}]=0.50$ ,  $\lambda[\text{R}_2=\text{CMe}_3]=0.48$ ,  $\lambda[\text{R}_3=\text{CMe}_3]=0.48$ ,  $\lambda[\text{R}_4=\text{CH}_2\text{CH}_2\text{R}]=0.176$

<sup>d</sup> – The dihedral angle values were obtained using substituent-uncorrected DAD (cross-terms) equation

<sup>e</sup> – Value of 13.35 Hz is above the upper limit of the predictive equation used

### 3. 2. 4. *cis-anti-cis*-Tricyclo[6.4.0.0<sup>2,7</sup>]dodecane-3,12-dione (**7**):

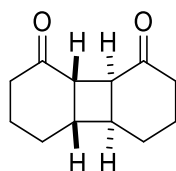

$\text{C}_{12}\text{H}_{16}\text{O}_2$   
MW: 192.258  
CAS 53092-46-9

Obtained as yellow solid (27.9 mg, 0.15 mmol, 2.9% yield). NMR data was consistent with literature.<sup>13,14</sup>  $R_f = 0.10$  (toluene:Et<sub>2</sub>O 9:1), 0.23 (*n*-hexane:AcOEt 8:2). GC  $R_t = 5.63$  min.  $^1\text{H}$  NMR (400 MHz, CDCl<sub>3</sub>)  $\delta$  (ppm) = 3.12 (dd,  $J=6.4, 1.7$  Hz, 2H), 2.82 (ddd,  $J=5.8, 4.4, 1.8$  Hz, 2H), 2.42 (ddd,  $J=14.3, 4.9, 3.7, 1.2$  Hz, 2H), 2.27 (dddd,  $J=14.3, 12.1, 5.2, 0.5$  Hz, 2H), 1.98 (dddd,  $J=13.5, 4.5, 4.5, 4.2, 4.2$  Hz, 2H), 1.86 (dddd,  $J=13.5, 12.0, 12.0, 3.7, 3.7$  Hz, 2H), 1.70 (dddd,  $J=13.7, 12.0, 4.4, 4.2, 0.5$  Hz,

2H), 1.52 (m, 2H).  $^{13}\text{C}$  NMR (101 MHz,  $\text{CDCl}_3$ )  $\delta$  (ppm) = 213.4 (C), 47.8 (CH), 41.2 ( $\text{CH}_2$ ), 40.3 (CH), 25.2 ( $\text{CH}_2$ ), 23.0 ( $\text{CH}_2$ ). LRMS (EI)  $m/z$  = 192.2 ( $\text{M}^+$ ), 175.2, 164.2, 149.2, 136.22, 121.1, 108.1, 96.1, 79.1, 68.1, 55.1, 41.2. LRMS (ESI+)  $m/z$  = 193.3 ( $\text{M} + \text{H}^+$ ), 215.2 ( $\text{M} + \text{Na}^+$ ), 308.4, 407.3 ( $2\text{M} + \text{Na}^+$ ).

### 3. 2. 5. *cis-anti-cis*-Tricyclo[6.4.0.0<sup>2,7</sup>]dodecane-3,9-dione (8):

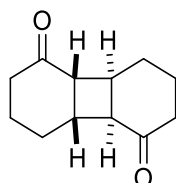

$\text{C}_{12}\text{H}_{16}\text{O}_2$   
MW: 192.258  
CAS 712-27-6

Obtained as slightly yellow solid (17.2 mg, 0.09 mmol, 1.8% yield). NMR data was consisted with literature.<sup>13,14</sup>  $R_f$  = 0.04 (toluene:Et<sub>2</sub>O 9:1), 0.14 (*n*-hexane:AcOEt 8:2). GC  $R_t$  = 5.49 min.  $^1\text{H}$  NMR (400 MHz,  $\text{CDCl}_3$ )  $\delta$  (ppm) = 3.05 (m, 2H), 2.66 (t,  $J=7.5$  Hz, 2H), 2.44 (m, 2H), 2.27 (m, 2H), 2.04 -1.81 (m, 6H), 1.70 (m, 2H).  $^{13}\text{C}$  NMR (101 MHz,  $\text{CDCl}_3$ )  $\delta$  (ppm) = 213.2 (C), 47.7 (CH), 40.2 ( $\text{CH}_2$ ), 38.5 (CH), 27.1 ( $\text{CH}_2$ ), 21.5 ( $\text{CH}_2$ ). LRMS (EI)  $m/z$  = 192.2 ( $\text{M}^+$ ), 163.2, 150.2, 136.2, 119.2, 108.2, 96.2, 79.2, 68.2, 55.1, 41.2. LRMS (ESI+)  $m/z$  = 193.3 ( $\text{M} + \text{H}^+$ ), 215.2 ( $\text{M} + \text{Na}^+$ ), 407.4 ( $2\text{M} + \text{Na}^+$ ).

### 3. 2. 6. 3-(1,1,2-Trimethyl-2-propen-1-yl)cyclohexanone (9):

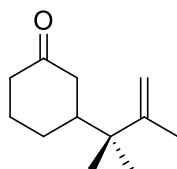

$\text{C}_{12}\text{H}_{20}\text{O}$   
MW: 180.291  
CAS 100675-58-9

Obtained as colourless oil (67.4 mg, 0.37 mmol, 7.5% yield). Compound reported in the literature (see <sup>4</sup>), but no spectral data was given.  $R_f$  = 0.49 (toluene:diethyl ether 9:1). GC  $R_t$  = 4.01 min.  $^1\text{H}$  NMR (400 MHz,  $\text{CDCl}_3$ )  $\delta$  (ppm) = 4.79 (br s, 1H), 4.72 (br s, 1H), 2.36 (ddd,  $J=14.2, 4.4, 2.1$  Hz, 1H), 2.30 (m, 1H), 2.22 (ddd,  $J=14.0, 13.8, 6.4$  Hz), 2.09 (m, 1H), 2.03 (dd,  $J=13.6, 13.5$  Hz, 1H), 1.85 – 1.74 (m, 2H), 1.68 (s, 3H), 1.56 (m, 1H), 1.32 (ddd,  $J=13.3, 12.8, 3.7$  Hz, 1H), 1.04 (s, 3H), 1.00 (s, 3H).  $^{13}\text{C}$  NMR (101 MHz,  $\text{CDCl}_3$ )  $\delta$  (ppm) = 213.0 (C), 151.5 (C), 110.7 ( $\text{CH}_2$ ), 45.3 (CH), 43.8 ( $\text{CH}_2$ ), 41.6 ( $\text{CH}_2$ ), 41.3 (C), 26.4 ( $\text{CH}_2$ ), 25.9 ( $\text{CH}_2$ ), 23.6 ( $\text{CH}_3$ ), 23.3 ( $\text{CH}_3$ ), 19.5 ( $\text{CH}_3$ ). LRMS (EI)  $m/z$  = 137.1, 107.2, 83.2, 69.1, 55.1, 41.1.

### 3. 3. Procedure for synthesis of compounds 10, 11, 12, and 13:

*Cis*-stilbene (721.0 mg, 4.00 mmol, 1.00 eq., 50.0 mM solution) and iodine (101.6 mg, 0.40 mmol, 0.10 eq., 5.0 mM solution) were dissolved in cyclohexane (80.0 mL, 111.0 vol.), obtained solution was saturated with oxygen by bubbling O<sub>2</sub> for 15 minutes, and then the mixture was injected into photoreactor (internal volume of 31.8 mL, 1.00 mm I.D., 1.60 mm O.D., PFA) equipped with UV-A lamp (Philips PLL 36W UVA). Irradiation over 50 minutes of effective exposure time was set (corresponding to 0.606 mL/min flow rate). After injection of 80.0 mL, reaction mixture was eluted from photoreactor using pure cyclohexane, reaction mixture was then collected, solvent was removed, and obtained residue was initially purified using column chromatography (SiO<sub>2</sub>; *n*-hexane:AcOEt 9:1) affording fractions containing recovered stilbene (371.9 mg, 2.06 mmol, recovery of 51.6% of starting material), phenanthrene (71.2 mg, 0.40 mmol, 10.0% yield) and combined fraction containing 1,2,3,4-tetraphenylcyclobutane isomers and 1,2-diphenyl-1,2,2a,10b-tetrahydrocyclobuta[*l*]phenanthrene (263.6 mg). The latter was then repurified using preparative HPLC system (Cosmosil Buckyprep column, *n*-hexane:AcOEt 9:1) and afforded fractions containing (1 $\alpha$ ,2 $\alpha$ ,3 $\beta$ ,4 $\beta$ )-1,2,3,4-tetraphenylcyclobutane and (1 $\alpha$ ,2 $\beta$ ,3 $\alpha$ ,4 $\beta$ )-1,2,3,4-tetraphenylcyclobutane as white solids (total mass of 121.9 mg, 0.34 mmol,

8.5% yield), and fraction containing pure 1,2-diphenyl-1,2,2a,10b-tetrahydrocyclobuta[*l*]phenanthrene (124.7 mg, 0.35 mmol, 8.7% yield).

### 3. 3. 1. Phenanthrene (10):

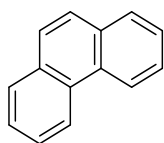

C<sub>14</sub>H<sub>10</sub>  
MW: 178.234  
CAS 85-01-8

White solid.  $R_f = 0.70$  in 10% AcOEt in *n*-hexane. GC  $R_t = 5.67$  min. NMR data was consistent with literature.<sup>2</sup> **Mp.** 100.0 – 100.3 °C. Lit. 99.1 – 100.5 °C.<sup>2</sup> <sup>1</sup>H NMR (400 MHz, CDCl<sub>3</sub>)  $\delta$  (ppm) = 8.70 (ddd,  $J=8.0, 1.3, 0.6$  Hz, 2H), 7.90 (ddd,  $J=7.7, 1.6, 0.6$  Hz, 2H), 7.75 (s, 2H), 7.67 (ddd,  $J=8.3, 7.0, 1.6$  Hz, 2H), 7.61 (ddd,  $J=7.7, 7.0, 1.3$  Hz, 2H). <sup>13</sup>C NMR (101 MHz, CDCl<sub>3</sub>)  $\delta$  (ppm) = 132.2, 130.4, 128.7, 127.1, 126.7, 122.8.

### 3. 3. 2. (1 $\alpha$ ,2 $\alpha$ ,3 $\beta$ ,4 $\beta$ )-1,2,3,4-Tetraphenylcyclobutane (11):

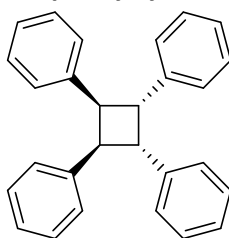

C<sub>28</sub>H<sub>24</sub>  
MW: 360.500  
CAS 54515-63-8

White solid.  $R_f = 0.55$  in 10% AcOEt in *n*-hexane. GC  $R_t = 10.11$  min. Compound reported in the literature (see <sup>15</sup>), but no spectral data was given. **Mp.** = 158.0 – 158.7 °C. Lit. = 163 °C.<sup>15</sup> <sup>1</sup>H NMR (400 MHz, CDCl<sub>3</sub>)  $\delta$  (ppm) = 7.21 – 7.01 (m, 20H), 4.48 (s, 4H). <sup>13</sup>C NMR (101 MHz, CDCl<sub>3</sub>)  $\delta$  (ppm) = 140.9 (C), 128.3 (CH), 128.1 (CH), 126.0 (C), 47.7 (CH). LRMS (EI)  $m/z = 180.2$  (C<sub>14</sub>H<sub>12</sub>).

### 3. 3. 3. (1 $\alpha$ ,2 $\beta$ ,3 $\alpha$ ,4 $\beta$ )-1,2,3,4-Tetraphenylcyclobutane (12):

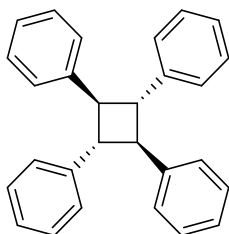

C<sub>28</sub>H<sub>24</sub>  
MW: 360.500  
CAS 54515-64-9

White solid.  $R_f = 0.48$  in 10% AcOEt in *n*-hexane. GC  $R_t = 10.33$  min. Compound reported in the literature (see <sup>15</sup>), but no spectral data was given. **Mp.** = 147.7 – 148.5 °C. Lit. = 150 °C.<sup>15</sup> <sup>1</sup>H NMR (400 MHz, CDCl<sub>3</sub>)  $\delta$  (ppm) = 7.33 – 7.28 (m, 16H), 7.22 (m, 4H), 3.70 (s, 4H). <sup>13</sup>C NMR (101 MHz, CDCl<sub>3</sub>)  $\delta$  (ppm) = 142.8 (C), 128.7 (CH), 127.2 (CH), 126.7 (CH), 51.8 (CH). LRMS (EI)  $m/z = 180.2$  (C<sub>14</sub>H<sub>12</sub>).

### 3. 3. 4. (1 $\alpha$ ,2 $\beta$ ,2 $\alpha$ R,10 $\beta$ S)-1,2-Diphenyl-1,2,2a,10b-tetrahydrocyclobuta[*l*]phenanthrene (13):

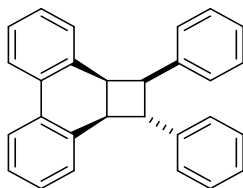

C<sub>28</sub>H<sub>22</sub>  
MW: 358.484  
CAS 79646-57-4



White solid.  $R_f = 0.46$  in 10% AcOEt in *n*-hexane. **GC**  $R_t = 8.06$  min. NMR data was consisted with literature.<sup>16</sup> **Mp.** = 181.7 – 182.3 °C, Lit. = 183.5 – 184.5 °C. <sup>16</sup>**<sup>1</sup>H NMR (400 MHz, CDCl<sub>3</sub>)  $\delta$  (ppm)** = 7.98 (dd, *J*=8.1, 1.3 Hz, 1H), 7.94 (dd, *J*=8.0, 1.2 Hz, 1H), 7.32 (td, *J*=7.7, 1.5 Hz, 1H), 7.29 – 7.14 (m, 10H), 7.06 (dd, *J*=7.5, 1.5 Hz, 1H), 7.01 – 6.94 (m, 2H), 6.84 (td, *J*= 7.4, 1.3 Hz, 1H), 6.23 (dt, *J* =7.7, 1.2 Hz, 1H), 4.36 (dd, *J*=11.2, 8.6 Hz, 1H), 4.25 (dd, *J*=8.6, 8.5 Hz, 1H), 3.99 (dd, *J*=11.2, 9.4 Hz, 1H), 3.82 (dd, *J*=8.9, 8.9 Hz, 1H). **<sup>13</sup>C NMR (101 MHz, CDCl<sub>3</sub>)  $\delta$  (ppm)** = 142.2, 138.7, 136.0, 133.1, 132.9, 132.3, 132.2, 129.2, 128.5, 128.4, 128.0, 127.8, 127.5, 127.0, 127.0, 126.8, 126.7, 126.6, 123.9, 122.9, 53.2, 51.8, 42.7, 40.5. **LRMS (EI) *m/z*** = 281.2, 267.2, 253.2, 207.2, 191.1, 178.2, 165.2, 152.2, 133.1, 96.1, 76.2, 44.2.

#### 4. NMR, UV-Vis, IR, and MS spectra

|                                                                                                                                                                                                                                                                                          |    |
|------------------------------------------------------------------------------------------------------------------------------------------------------------------------------------------------------------------------------------------------------------------------------------------|----|
| Figure S 27. <sup>1</sup> H NMR spectrum of cis-7,8-diphenyl-2-oxabicyclo[4.2.0]oct-7-ene ( <b>1</b> ). .....                                                                                                                                                                            | 81 |
| Figure S 28. <sup>13</sup> C (top) and DEPT-135 (bottom) NMR spectra of cis-7,8-diphenyl-2-oxabicyclo[4.2.0]oct-7-ene ( <b>1</b> ). .....                                                                                                                                                | 82 |
| Figure S 29. UV-Vis absorbance of cis-7,8-diphenyl-2-oxabicyclo[4.2.0]oct-7-ene in acetonitrile.....                                                                                                                                                                                     | 83 |
| Figure S 30. Determination of molar extinction coefficient o cis-f7,8-diphenyl-2-oxabicyclo[4.2.0]oct-7-ene. ....                                                                                                                                                                        | 83 |
| Figure S 31. Electrospray ionisation mass spectrum of cis-7,8-diphenyl-2-oxabicyclo[4.2.0]oct-7-ene ( <b>1</b> ). .....                                                                                                                                                                  | 84 |
| Figure S 32. Electron ionization mass spectrum of cis-7,8-diphenyl-2-oxabicyclo[4.2.0]oct-7-ene ( <b>1</b> ). .....                                                                                                                                                                      | 84 |
| Figure S 33. <sup>1</sup> H NMR spectrum of 3,4-dihydro-6,7-diphenyl-2H-oxocin ( <b>2</b> ). .....                                                                                                                                                                                       | 85 |
| Figure S 34. <sup>13</sup> C (top) and DEPT-135 (bottom) NMR spectra of 3,4-dihydro-6,7-diphenyl-2H-oxocin ( <b>2</b> ). .....                                                                                                                                                           | 86 |
| Figure S 35. Electron ionisation mass spectrum of 3,4-dihydro-6,7-diphenyl-2H-oxocin ( <b>2</b> ). .....                                                                                                                                                                                 | 86 |
| Figure S 36. High resolution electron ionisation mass spectrum of 3,4-dihydro-6,7-diphenyl-2H-oxocin ( <b>2</b> ). .....                                                                                                                                                                 | 87 |
| Figure S 37. <sup>1</sup> H NMR spectrum of 8c,11,12,12a-tetrahydro-10H-phenanthro[9',10':3,4]cyclobuta[1,2-b]pyran ( <b>3</b> ). .....                                                                                                                                                  | 88 |
| Figure S 38. <sup>13</sup> C (top) and DEPT-135 (bottom) NMR of 8c,11,12,12a-tetrahydro-10H-phenanthro[9',10':3,4]cyclobuta[1,2-b]pyran ( <b>3</b> ). .....                                                                                                                              | 89 |
| Figure S 39. Electron ionisation mass spectrum of 8c,11,12,12a-tetrahydro-10H-phenanthro[9',10':3,4]cyclobuta[1,2-b]pyran ( <b>3</b> ). .....                                                                                                                                            | 89 |
| Figure S 40. High resolution electron ionisation mass spectrum of 8c,11,12,12a-tetrahydro-10H-phenanthro[9',10':3,4]cyclobuta[1,2-b]pyran ( <b>3</b> ). .....                                                                                                                            | 90 |
| Figure S 41. <sup>1</sup> H NMR spectrum of (5 $\alpha$ ,6 $\beta$ ,7 $\alpha$ ,12 $\alpha$ ,13 $\beta$ ,14 $\alpha$ )-1,11-Dioxa-6,13-diphenyltetracyclo[6.6.0.0 <sup>5,14</sup> ,0 <sup>7,12</sup> ]tetradecane ( <b>4</b> ) in CDCl <sub>3</sub> . .....                              | 91 |
| Figure S 42. <sup>13</sup> C (top) and DEPT-135 (bottom) NMR spectrum of (5 $\alpha$ ,6 $\beta$ ,7 $\alpha$ ,12 $\alpha$ ,13 $\beta$ ,14 $\alpha$ )-1,11-Dioxa-6,13-diphenyltetracyclo[6.6.0.0 <sup>5,14</sup> ,0 <sup>7,12</sup> ]tetradecane ( <b>4</b> ) in CDCl <sub>3</sub> . ..... | 92 |
| Figure S 43. HSQC NMR spectrum of (5 $\alpha$ ,6 $\beta$ ,7 $\alpha$ ,12 $\alpha$ ,13 $\beta$ ,14 $\alpha$ )-1,11-Dioxa-6,13-Diphenyltetracyclo[6.6.0.0 <sup>5,14</sup> ,0 <sup>7,12</sup> ]tetradecane ( <b>4</b> ) in CDCl <sub>3</sub> . .....                                        | 93 |
| Figure S 44. HMBC NMR spectrum of (5 $\alpha$ ,6 $\beta$ ,7 $\alpha$ ,12 $\alpha$ ,13 $\beta$ ,14 $\alpha$ )-1,11-Dioxa-6,13-Diphenyltetracyclo[6.6.0.0 <sup>5,14</sup> ,0 <sup>7,12</sup> ]tetradecane ( <b>4</b> ) in CDCl <sub>3</sub> . .....                                        | 94 |

|                                                                                                                                                                                                                                                                       |     |
|-----------------------------------------------------------------------------------------------------------------------------------------------------------------------------------------------------------------------------------------------------------------------|-----|
| Figure S 45. COSY NMR spectrum of (5 $\alpha$ ,6 $\beta$ ,7 $\alpha$ ,12 $\alpha$ ,13 $\beta$ ,14 $\alpha$ )-1,11-Dioxa-6,13-Diphenyltetracyclo[6.6.0.0 <sup>5,14</sup> ,0 <sup>7,12</sup> ]tetradecane ( <b>4</b> ) in CDCl <sub>3</sub> .....                       | 95  |
| Figure S 46. TOCSY NMR spectrum of (5 $\alpha$ ,6 $\beta$ ,7 $\alpha$ ,12 $\alpha$ ,13 $\beta$ ,14 $\alpha$ )-1,11-Dioxa-6,13-Diphenyltetracyclo[6.6.0.0 <sup>5,14</sup> ,0 <sup>7,12</sup> ]tetradecane ( <b>4</b> ) in CDCl <sub>3</sub> .....                      | 96  |
| Figure S 47. NOESY NMR spectrum of (5 $\alpha$ ,6 $\beta$ ,7 $\alpha$ ,12 $\alpha$ ,13 $\beta$ ,14 $\alpha$ )-1,11-Dioxa-6,13-Diphenyltetracyclo[6.6.0.0 <sup>5,14</sup> ,0 <sup>7,12</sup> ]tetradecane ( <b>4</b> ) in CDCl <sub>3</sub> .....                      | 97  |
| Figure S 48. <sup>1</sup> H NMR spectrum of (5 $\alpha$ ,6 $\beta$ ,7 $\alpha$ ,12 $\alpha$ ,13 $\beta$ ,14 $\alpha$ )-1,11-Dioxa-6,13-diphenyltetracyclo[6.6.0.0 <sup>5,14</sup> ,0 <sup>7,12</sup> ]tetradecane ( <b>4</b> ) in DMSO-d <sub>6</sub> at 100 °C.....  | 98  |
| Figure S 49. <sup>13</sup> C NMR spectrum of (5 $\alpha$ ,6 $\beta$ ,7 $\alpha$ ,12 $\alpha$ ,13 $\beta$ ,14 $\alpha$ )-1,11-Dioxa-6,13-diphenyltetracyclo[6.6.0.0 <sup>5,14</sup> ,0 <sup>7,12</sup> ]tetradecane ( <b>4</b> ) in DMSO-d <sub>6</sub> at 80 °C. .... | 99  |
| Figure S 50. FT-ATR-IR spectrum of neat of (5 $\alpha$ ,6 $\beta$ ,7 $\alpha$ ,12 $\alpha$ ,13 $\beta$ ,14 $\alpha$ )-1,11-Dioxa-6,13-diphenyltetracyclo[6.6.0.0 <sup>5,14</sup> ,0 <sup>7,12</sup> ]tetradecane ( <b>4</b> ).....                                    | 99  |
| Figure S 51. High resolution electrospray ionisation mass spectrum of (5 $\alpha$ ,6 $\beta$ ,7 $\alpha$ ,12 $\alpha$ ,13 $\beta$ ,14 $\alpha$ )-1,11-Dioxa-6,13-diphenyltetracyclo[6.6.0.0 <sup>5,14</sup> ,0 <sup>7,12</sup> ]tetradecane ( <b>4</b> ). ....        | 100 |
| Figure S 52. High resolution electron ionisation mass spectrum of (5 $\alpha$ ,6 $\beta$ ,7 $\alpha$ ,12 $\alpha$ ,13 $\beta$ ,14 $\alpha$ )-1,11-Dioxa-6,13-diphenyltetracyclo[6.6.0.0 <sup>5,14</sup> ,0 <sup>7,12</sup> ]tetradecane ( <b>4</b> ). ....            | 100 |
| Figure S 53. <sup>1</sup> H NMR spectrum of trans-7,7,8,8-tetramethylbicyclo[4.2.0]octan-2-one ( <b>5</b> ).....                                                                                                                                                      | 101 |
| Figure S 54. <sup>13</sup> C (top) and DEPT-135 (bottom) NMR spectrum of trans-7,7,8,8-tetramethylbicyclo[4.2.0]octan-2-one ( <b>5</b> ). ....                                                                                                                        | 102 |
| Figure S 55. Electron ionisation mass spectrum of trans-7,7,8,8-tetramethylbicyclo[4.2.0]octan-2-one ( <b>5</b> ). ....                                                                                                                                               | 102 |
| Figure S 56. <sup>1</sup> H NMR spectrum of cis-7,7,8,8-tetramethylbicyclo[4.2.0]octan-2-one ( <b>6</b> ). ....                                                                                                                                                       | 103 |
| Figure S 57. <sup>13</sup> C NMR spectrum of cis-7,7,8,8-tetramethylbicyclo[4.2.0]octan-2-one ( <b>6</b> ). ....                                                                                                                                                      | 103 |
| Figure S 58. Electron ionisation mass spectrum of cis-7,7,8,8-tetramethylbicyclo[4.2.0]octan-2-one ( <b>6</b> ). ....                                                                                                                                                 | 104 |
| Figure S 59. <sup>1</sup> H NMR spectrum of cis-anti-cis-tricyclo[6.4.0.0 <sup>2,7</sup> ]dodecane-3,12-dione ( <b>7</b> ). ....                                                                                                                                      | 104 |
| Figure S 60. <sup>13</sup> C (top) and DEPT-135 (bottom) NMR spectrum of cis-anti-cis-tricyclo[6.4.0.0 <sup>2,7</sup> ]dodecane-3,12-dione ( <b>7</b> ). ....                                                                                                         | 105 |
| Figure S 61. Electrospray ionisation mass spectrum of cis-anti-cis-tricyclo[6.4.0.0 <sup>2,7</sup> ]dodecane-3,12-dione ( <b>7</b> ). ....                                                                                                                            | 105 |
| Figure S 62. Electron ionisation mass spectrum of cis-anti-cis-tricyclo[6.4.0.0 <sup>2,7</sup> ]dodecane-3,12-dione ( <b>7</b> ). ....                                                                                                                                | 106 |
| Figure S 63. <sup>1</sup> H NMR spectrum of cis-anti-cis-tricyclo[6.4.0.0 <sup>2,7</sup> ]dodecane-3,9-dione ( <b>8</b> ). ....                                                                                                                                       | 106 |
| Figure S 64. <sup>13</sup> C (top) and DEPT-135 (bottom) NMR spectrum of cis-anti-cis-tricyclo[6.4.0.0 <sup>2,7</sup> ]dodecane-3,9-dione ( <b>8</b> ). ....                                                                                                          | 107 |
| Figure S 65. Electrospray ionisation mass spectrum of cis-anti-cis-tricyclo[6.4.0.0 <sup>2,7</sup> ]dodecane-3,9-dione ( <b>8</b> ). ....                                                                                                                             | 107 |
| Figure S 66. Electron ionisation mass spectrum of cis-anti-cis-tricyclo[6.4.0.0 <sup>2,7</sup> ]dodecane-3,9-dione ( <b>8</b> ). ....                                                                                                                                 | 108 |
| Figure S 67. <sup>1</sup> H NMR spectrum of 3-(2,3-dimethylbut-3-en-2-yl)cyclohexan-1-one ( <b>9</b> ). ....                                                                                                                                                          | 108 |
| Figure S 68. <sup>13</sup> C NMR spectrum of 3-(2,3-dimethylbut-3-en-2-yl)cyclohexan-1-one ( <b>9</b> ). ....                                                                                                                                                         | 109 |
| Figure S 69. Electron ionisation mass spectrum of 3-(2,3-dimethylbut-3-en-2-yl)cyclohexan-1-one ( <b>9</b> ). ....                                                                                                                                                    | 109 |
| Figure S 70. <sup>1</sup> H NMR spectrum of phenanthrene ( <b>10</b> ). ....                                                                                                                                                                                          | 110 |
| Figure S 71. <sup>13</sup> C NMR spectrum of phenanthrene ( <b>10</b> ). ....                                                                                                                                                                                         | 110 |
| Figure S 72. <sup>1</sup> H NMR spectrum of (1 $\alpha$ ,2 $\alpha$ ,3 $\beta$ ,4 $\beta$ )-1,2,3,4-Tetraphenylcyclobutane ( <b>11</b> ). ....                                                                                                                        | 111 |

|                                                                                                                                                                                            |     |
|--------------------------------------------------------------------------------------------------------------------------------------------------------------------------------------------|-----|
| Figure S 73. $^{13}\text{C}$ NMR spectrum of (1 $\alpha$ ,2 $\alpha$ ,3 $\beta$ ,4 $\beta$ )-1,2,3,4-Tetraphenylcyclobutane ( <b>11</b> ). .....                                           | 111 |
| Figure S 74. Electron ionisation mass spectrum of (1 $\alpha$ ,2 $\alpha$ ,3 $\beta$ ,4 $\beta$ )-1,2,3,4-Tetraphenylcyclobutane ( <b>11</b> ). .....                                      | 112 |
| Figure S 75. $^1\text{H}$ NMR spectrum of (1 $\alpha$ ,2 $\beta$ ,3 $\alpha$ ,4 $\beta$ )-1,2,3,4-Tetraphenylcyclobutane ( <b>12</b> ). .....                                              | 112 |
| Figure S 76. $^{13}\text{C}$ NMR spectrum of (1 $\alpha$ ,2 $\beta$ ,3 $\alpha$ ,4 $\beta$ )-1,2,3,4-Tetraphenylcyclobutane ( <b>12</b> ). .....                                           | 112 |
| Figure S 77. Electron ionisation mass spectrum of (1 $\alpha$ ,2 $\beta$ ,3 $\alpha$ ,4 $\beta$ )-1,2,3,4-Tetraphenylcyclobutane ( <b>12</b> ). .....                                      | 113 |
| Figure S 78. $^1\text{H}$ NMR spectrum of (1 $\alpha$ ,2 $\beta$ ,2aR,10bS)-1,2-diphenyl-1,2,2a,10b-tetrahydrocyclobuta[l]phenanthrene ( <b>13</b> ). .....                                | 113 |
| Figure S 79. $^{13}\text{C}$ (top) and DEPT-135 (bottom) NMR spectrum of (1 $\alpha$ ,2 $\beta$ ,2aR,10bS)-1,2-diphenyl-1,2,2a,10b-tetrahydrocyclobuta[l]phenanthrene ( <b>13</b> ). ..... | 114 |
| Figure S 80. Electron ionisation mass spectrum of (1 $\alpha$ ,2 $\beta$ ,2aR,10bS)-1,2-diphenyl-1,2,2a,10b-tetrahydrocyclobuta[l]phenanthrene ( <b>13</b> ). .....                        | 115 |

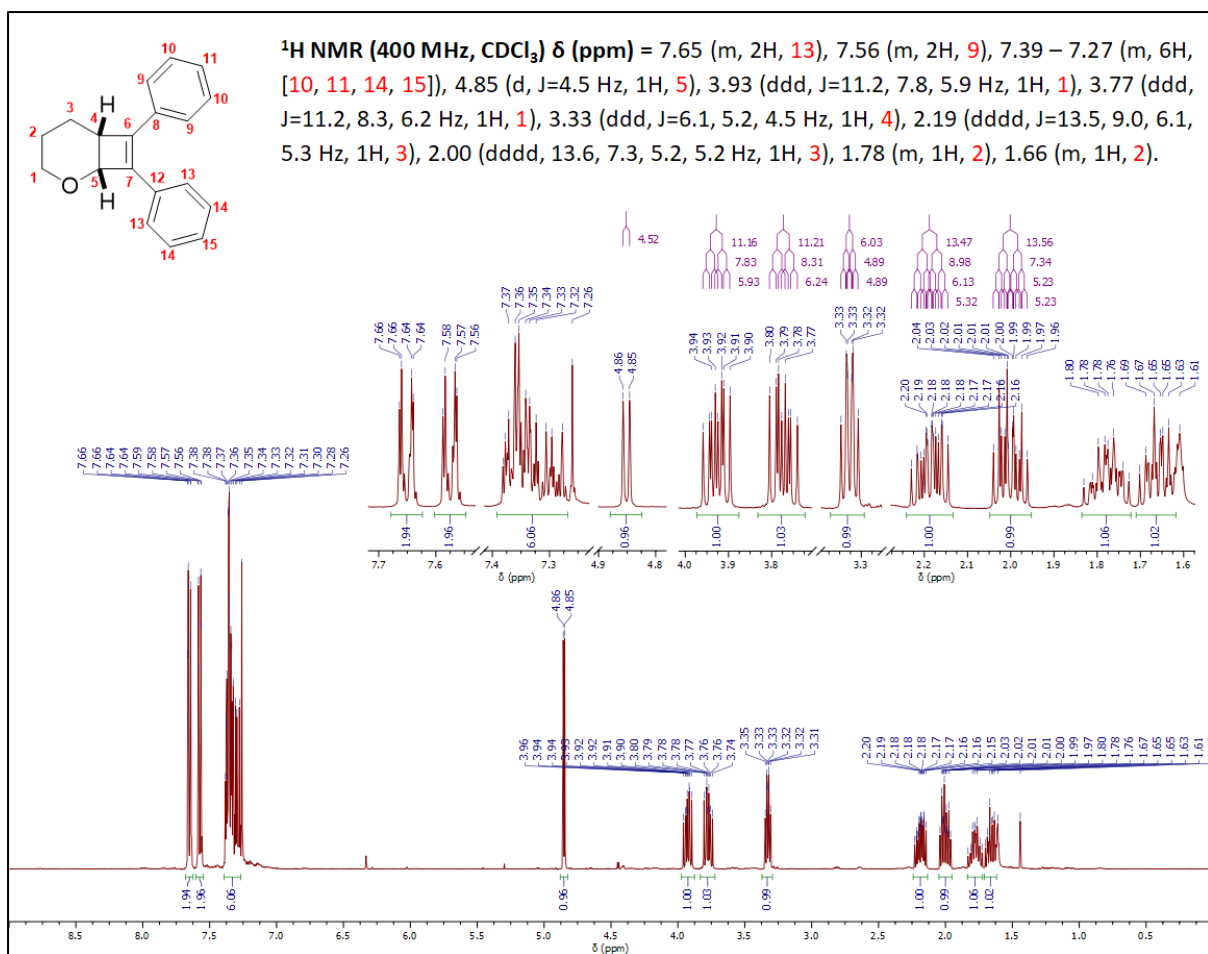

Figure S 27. <sup>1</sup>H NMR spectrum of *cis*-7,8-diphenyl-2-oxabicyclo[4.2.0]oct-7-ene (**1**).

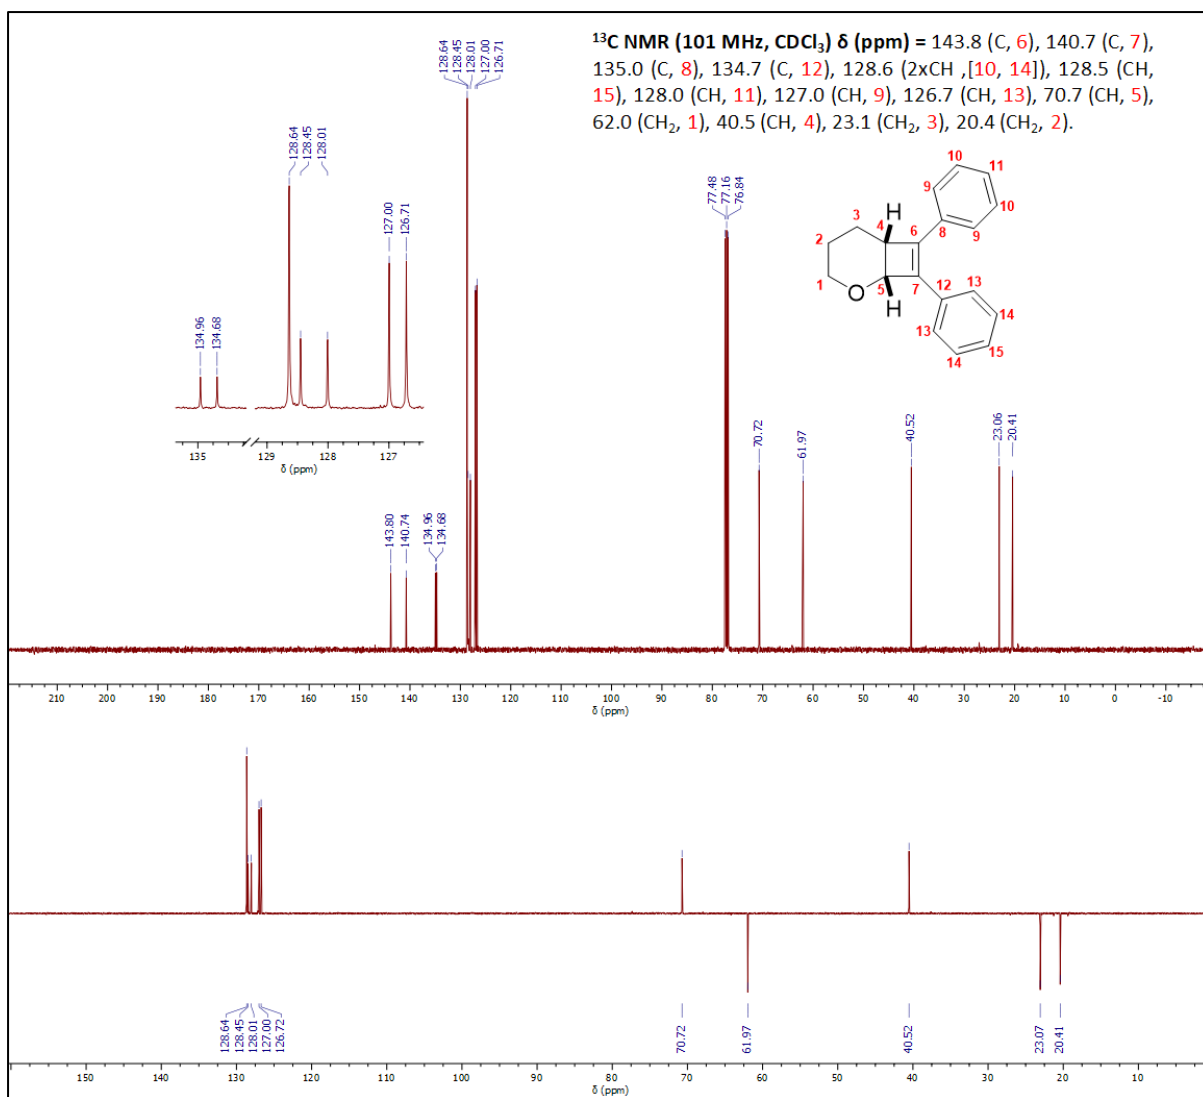

Figure S 28. <sup>13</sup>C (top) and DEPT-135 (bottom) NMR spectra of *cis*-7,8-diphenyl-2-oxabicyclo[4.2.0]oct-7-ene (1).

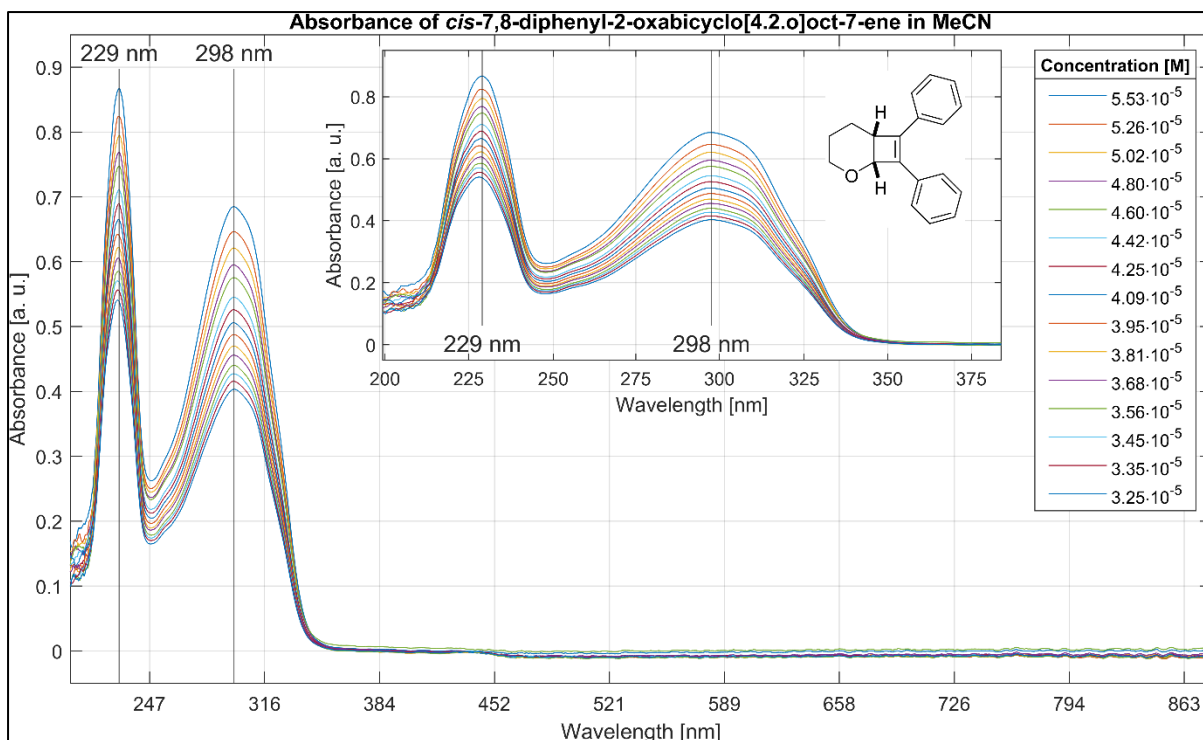

Figure S 29. UV-Vis absorbance of *cis*-7,8-diphenyl-2-oxabicyclo[4.2.0]oct-7-ene in acetonitrile.

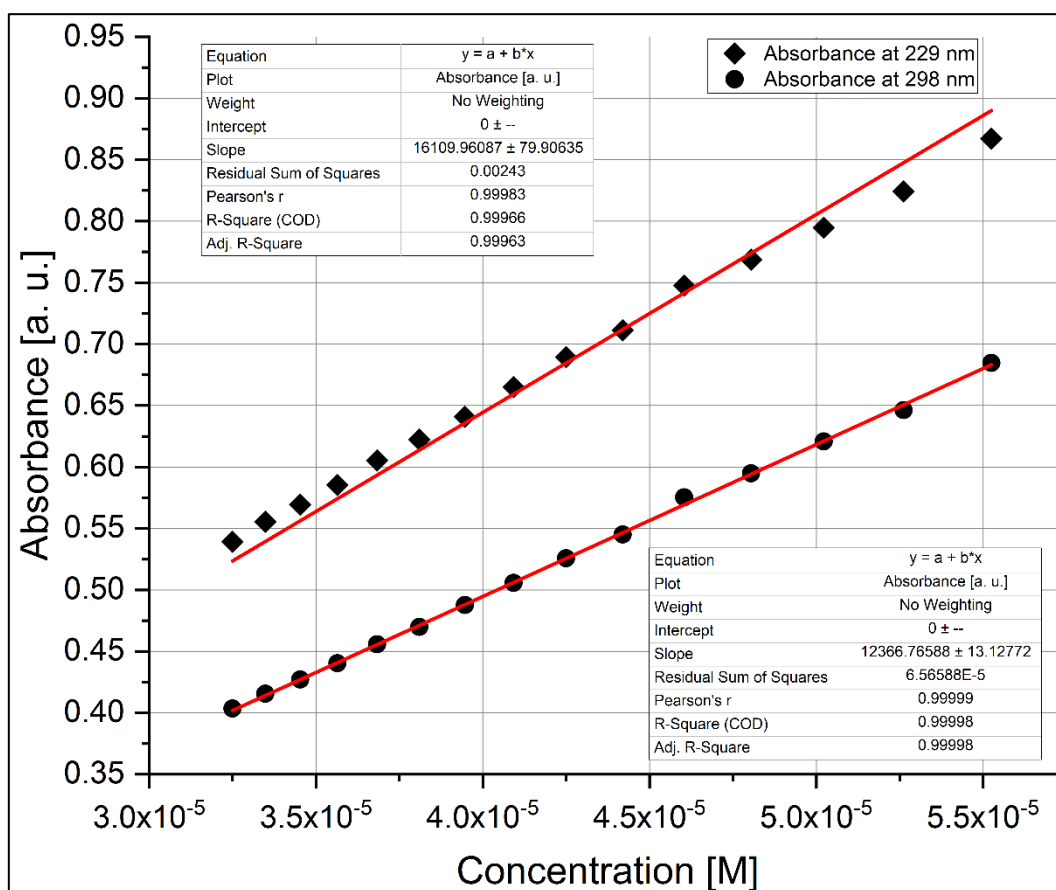

Figure S 30. Determination of molar extinction coefficient of *cis*-7,8-diphenyl-2-oxabicyclo[4.2.0]oct-7-ene.

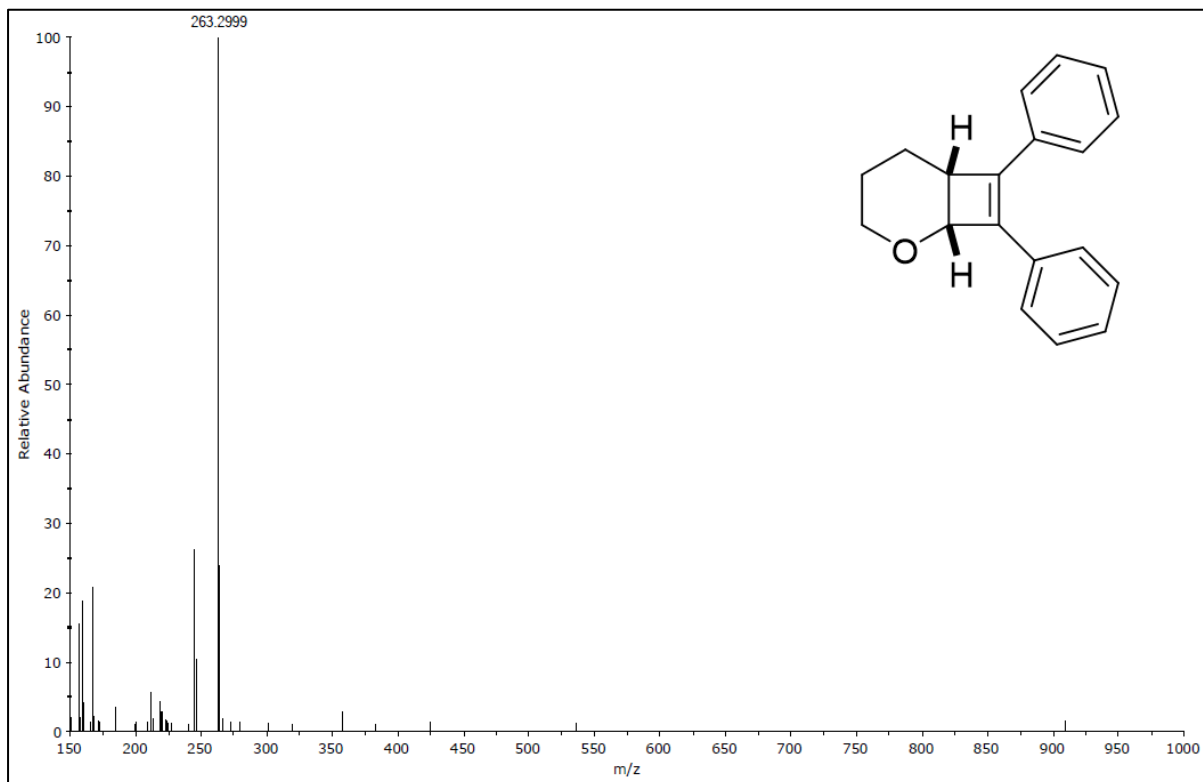

Figure S 31. Electrospray ionisation mass spectrum of cis-7,8-diphenyl-2-oxabicyclo[4.2.0]oct-7-ene (1).

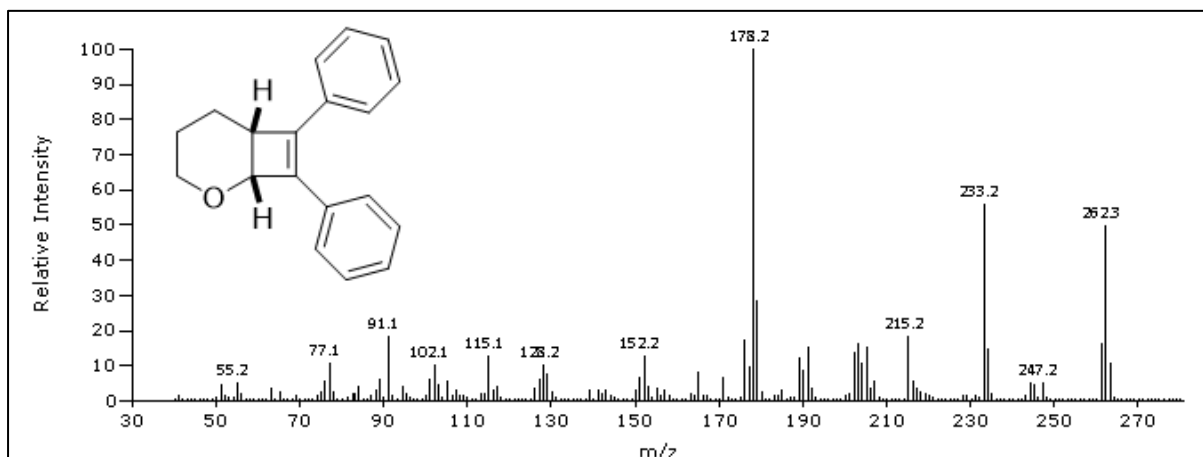

Figure S 32. Electron ionization mass spectrum of cis-7,8-diphenyl-2-oxabicyclo[4.2.0]oct-7-ene (1).

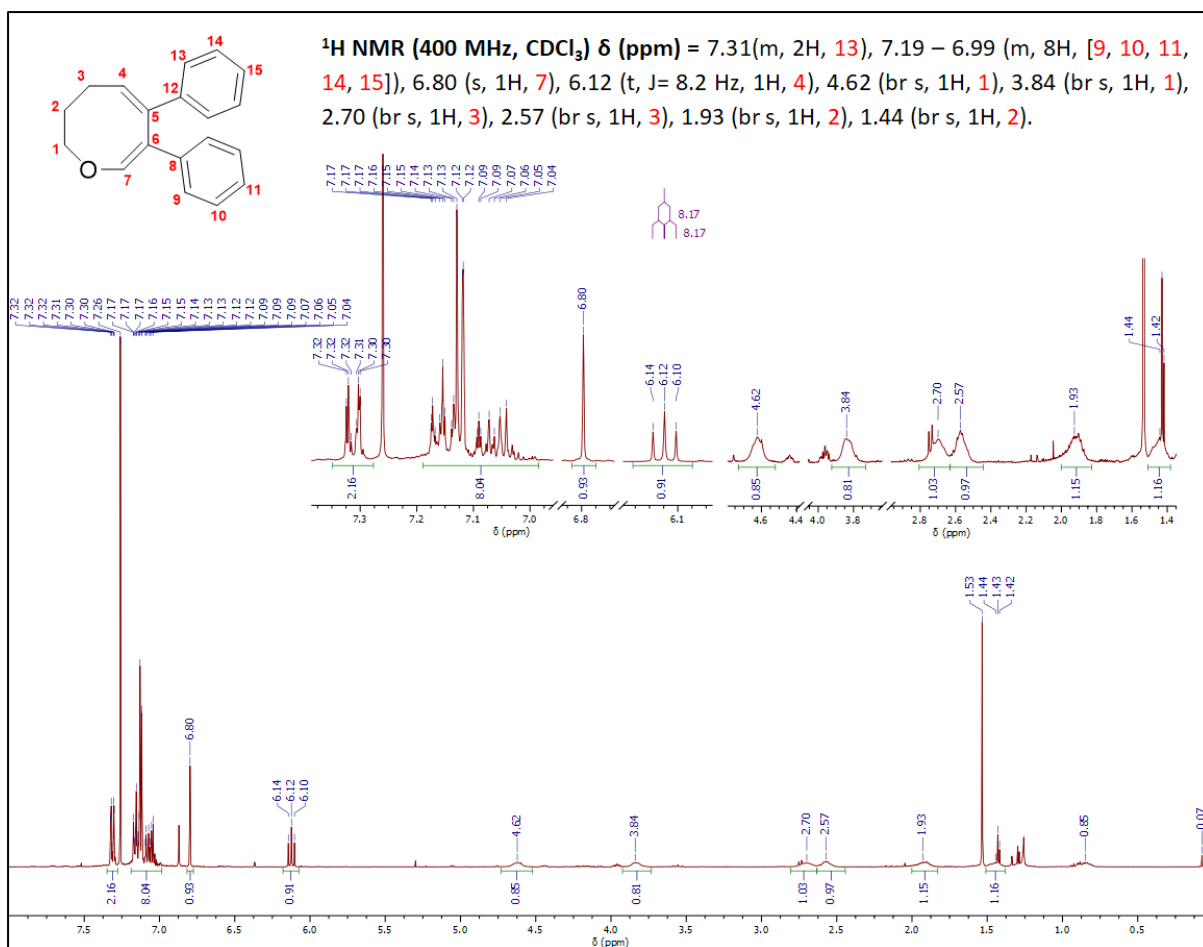

Figure S 33. <sup>1</sup>H NMR spectrum of 3,4-dihydro-6,7-diphenyl-2H-oxcin (**2**).



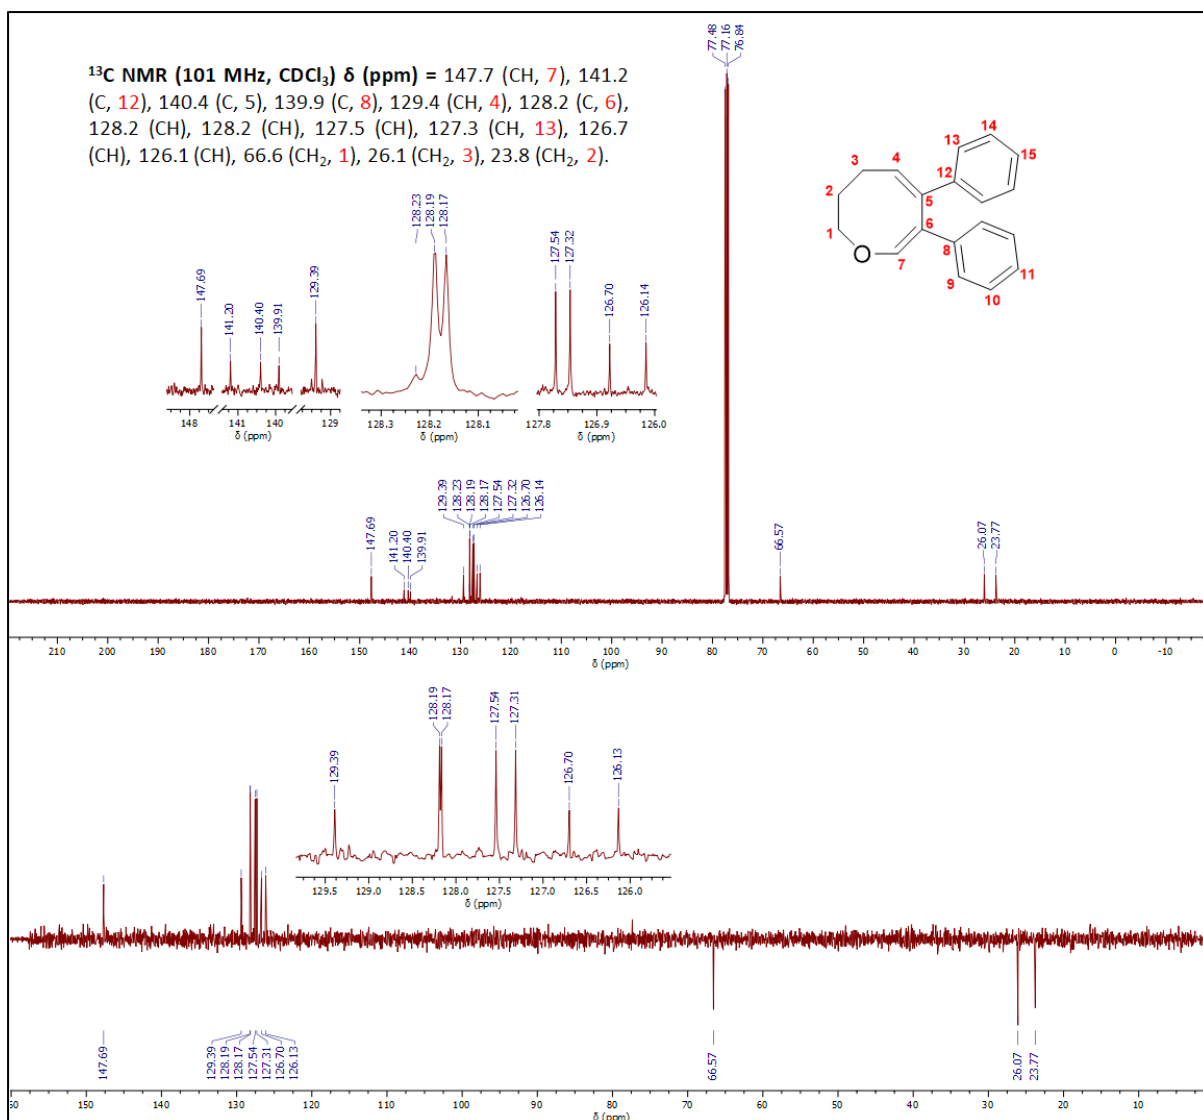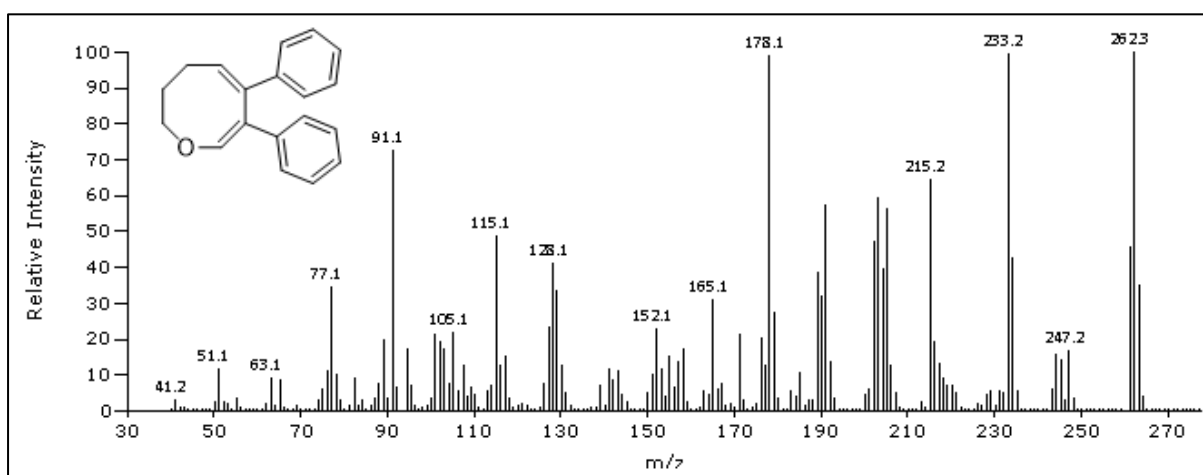

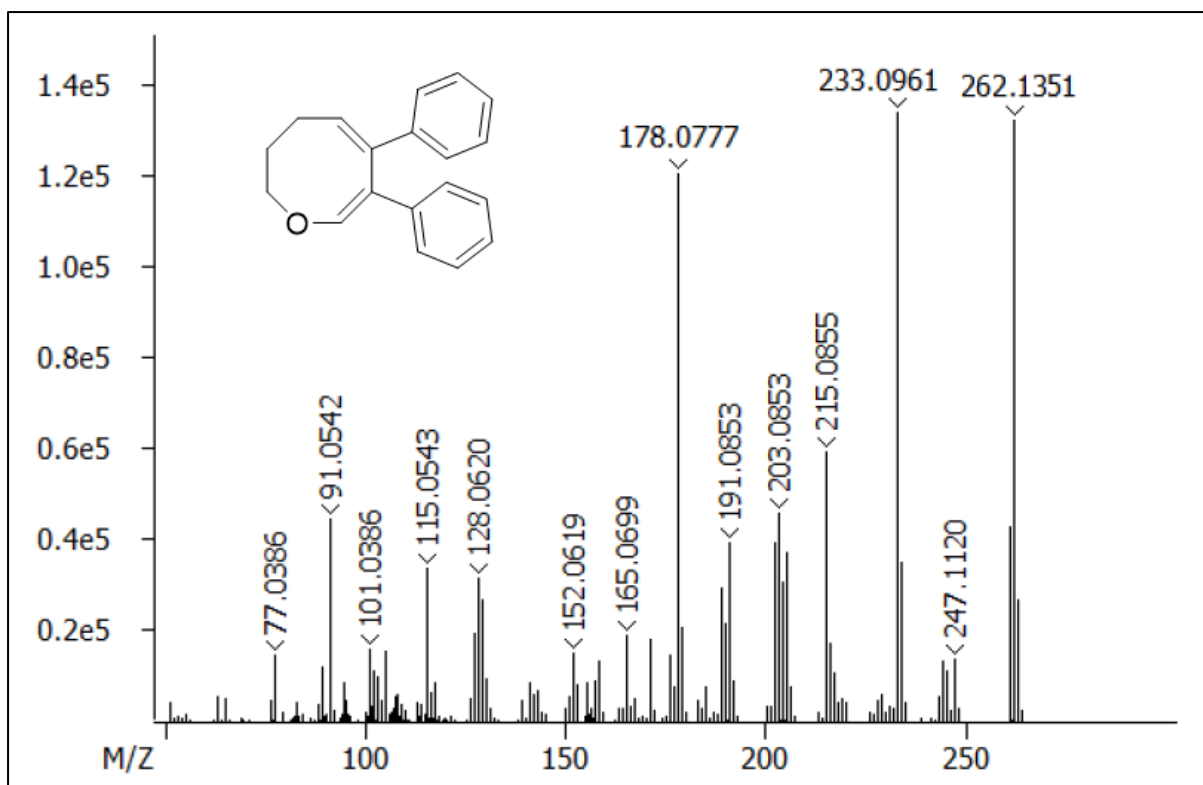

Figure S 36. High resolution electron ionisation mass spectrum of 3,4-dihydro-6,7-diphenyl-2H-oxcin (2).

$^1\text{H NMR}$  (400 MHz,  $\text{CDCl}_3$ )  $\delta$  (ppm) = 8.80 – 8.71 (m, 2H, [10, 13]), 7.97 (m, 1H, 16), 7.81 (ddd,  $J=7.5, 1.7, 0.6$  Hz, 1H, 7) 7.70 – 7.59 (m, 4H, [8, 9, 14, 15]), 5.45 (d,  $J=4.3$  Hz, 1H, 19), 4.04 (dt,  $J=6.0, 4.5$  Hz, 1H, 4), 3.91 – 3.78 (m, 2H, 1), 2.37 (dddd,  $J=13.7, 10.2, 6.0, 5.3$  Hz, 1H, 3a), 2.22 (dddd,  $J=13.7, 6.2, 5.3, 4.6$  Hz, 1H, 3b), 1.64 (m, 1H, 2), 1.40 (m, 1H, 2).

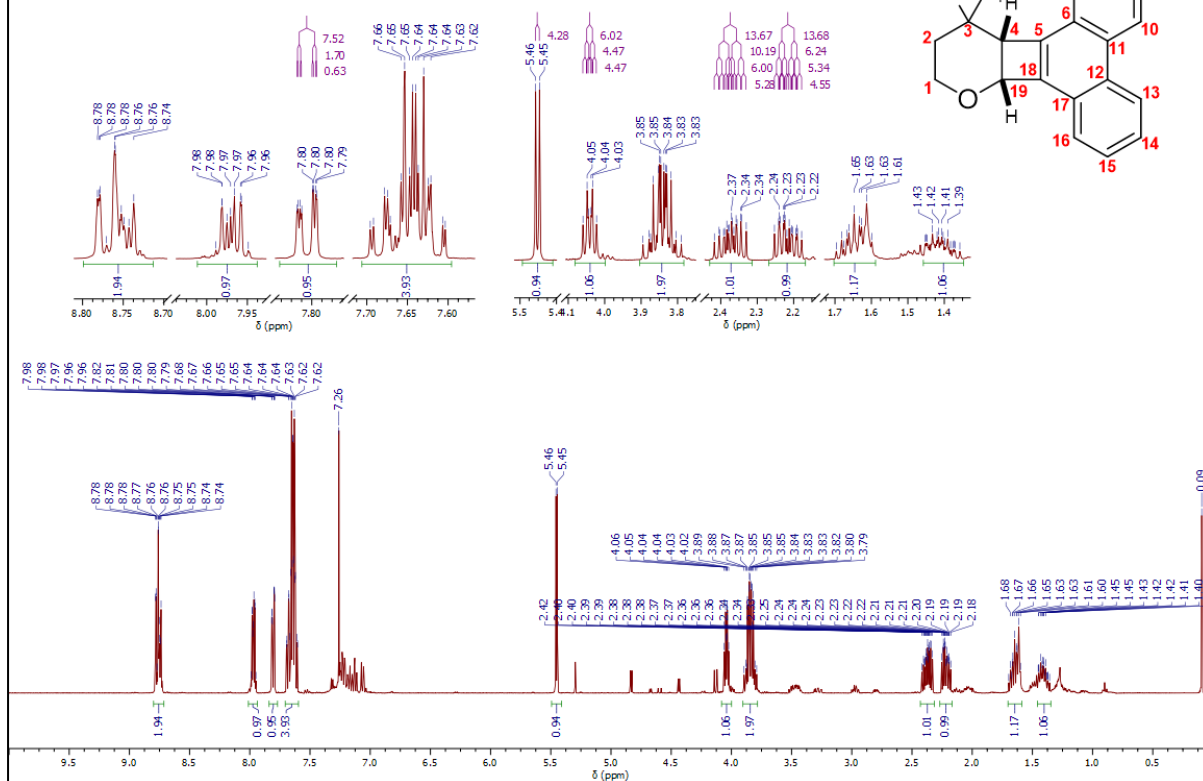

Figure S 37.  $^1\text{H NMR}$  spectrum of 8c,11,12,12a-tetrahydro-10H-phenanthro[9',10':3,4]cyclobuta[1,2-b]pyran (**3**).

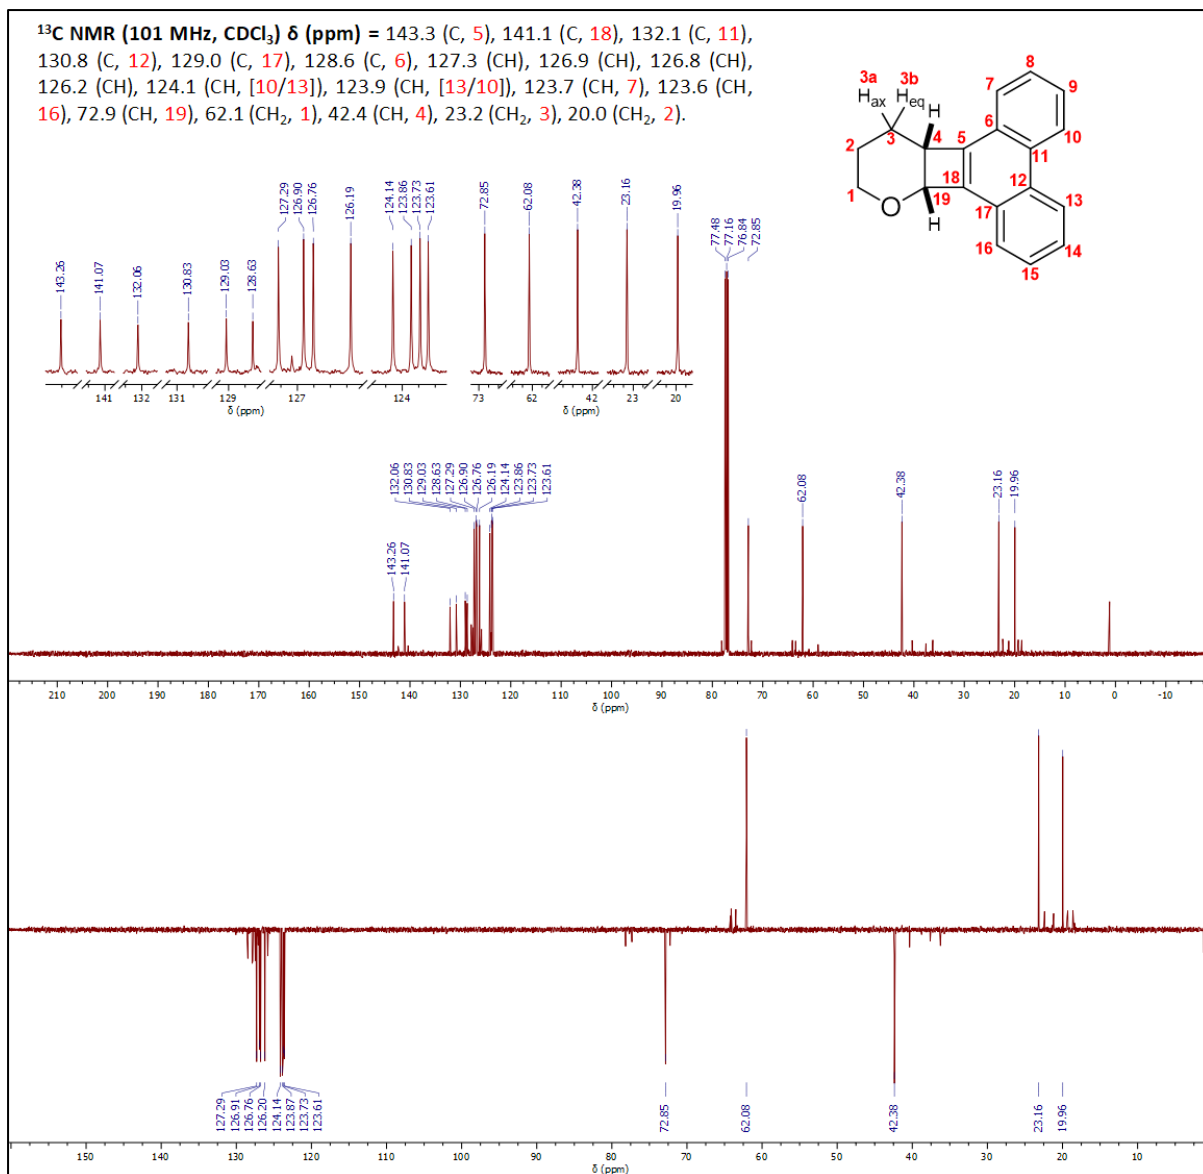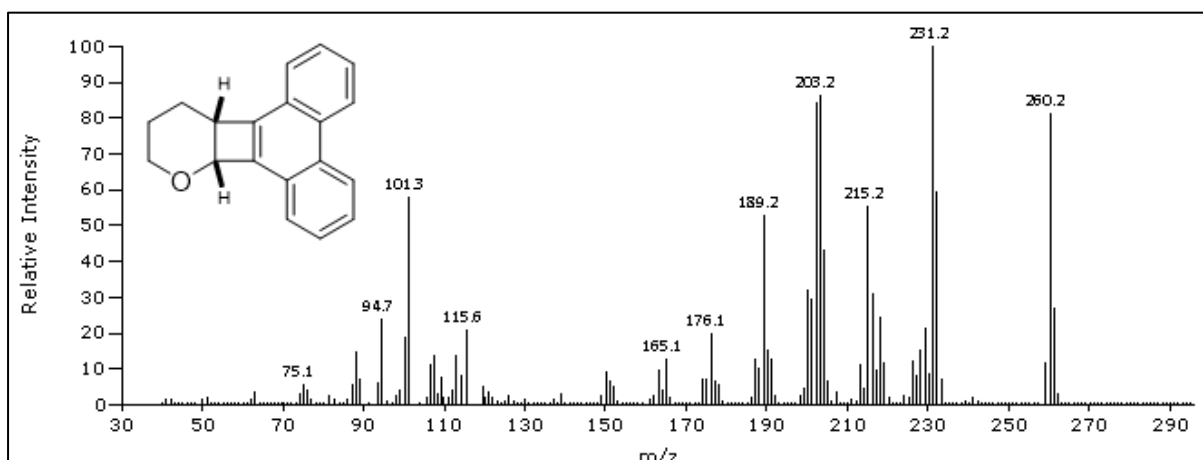

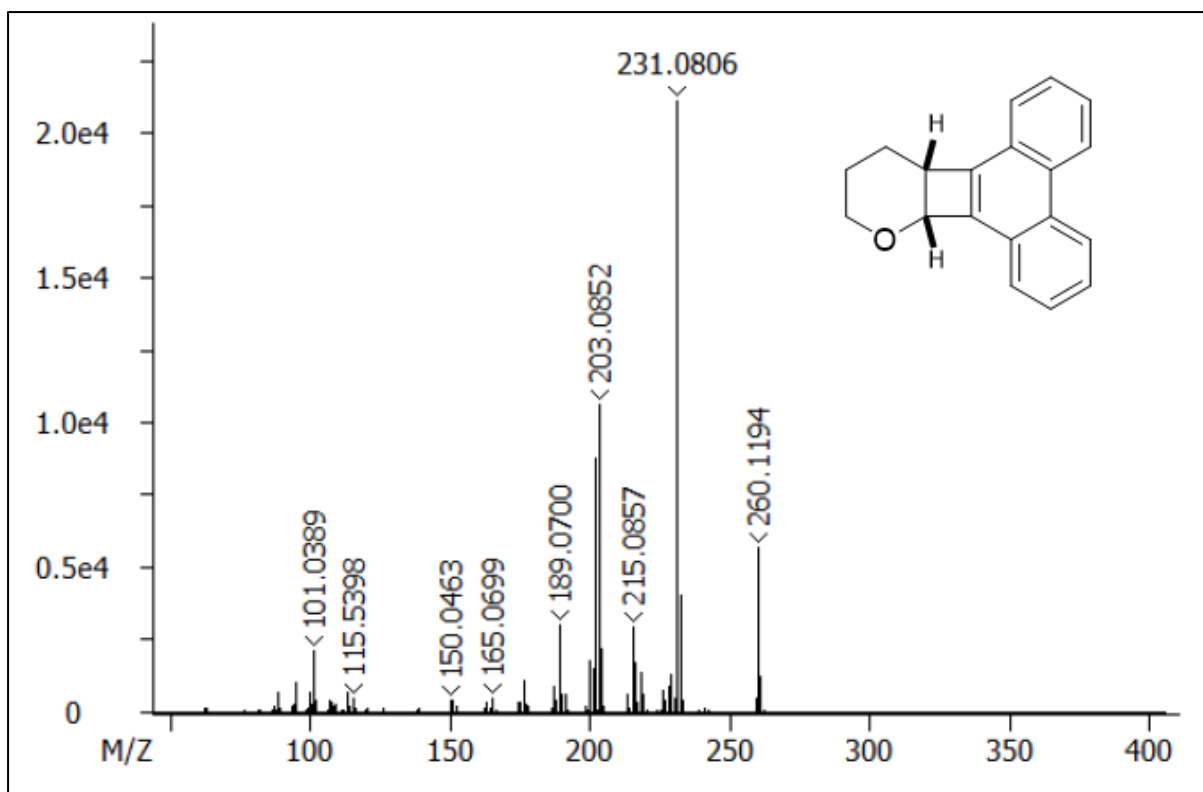

Figure S 40. High resolution electron ionisation mass spectrum of 8c,11,12,12a-tetrahydro-10H-phenanthro[9',10':3,4]cyclobuta[1,2-b]pyran (**3**).

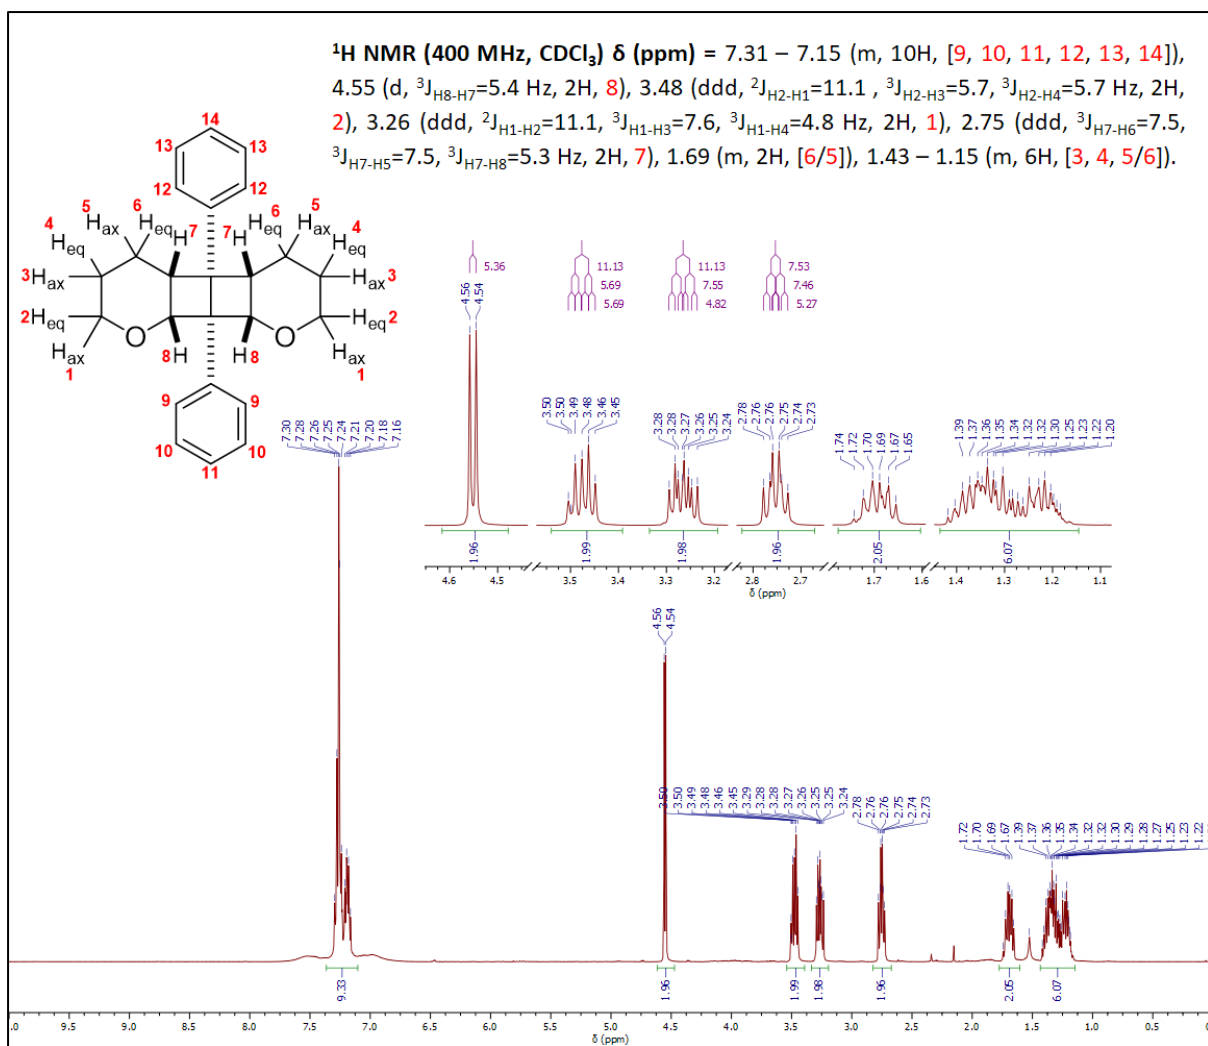

Figure S 41. <sup>1</sup>H NMR spectrum of (5 $\alpha$ ,6 $\beta$ ,7 $\alpha$ ,12 $\alpha$ ,13 $\beta$ ,14 $\alpha$ )-1,11-Dioxo-6,13-diphenyltetracyclo[6.6.0.0<sup>5,14</sup>,0<sup>7,12</sup>]tetradecane (**4**) in CDCl<sub>3</sub>.

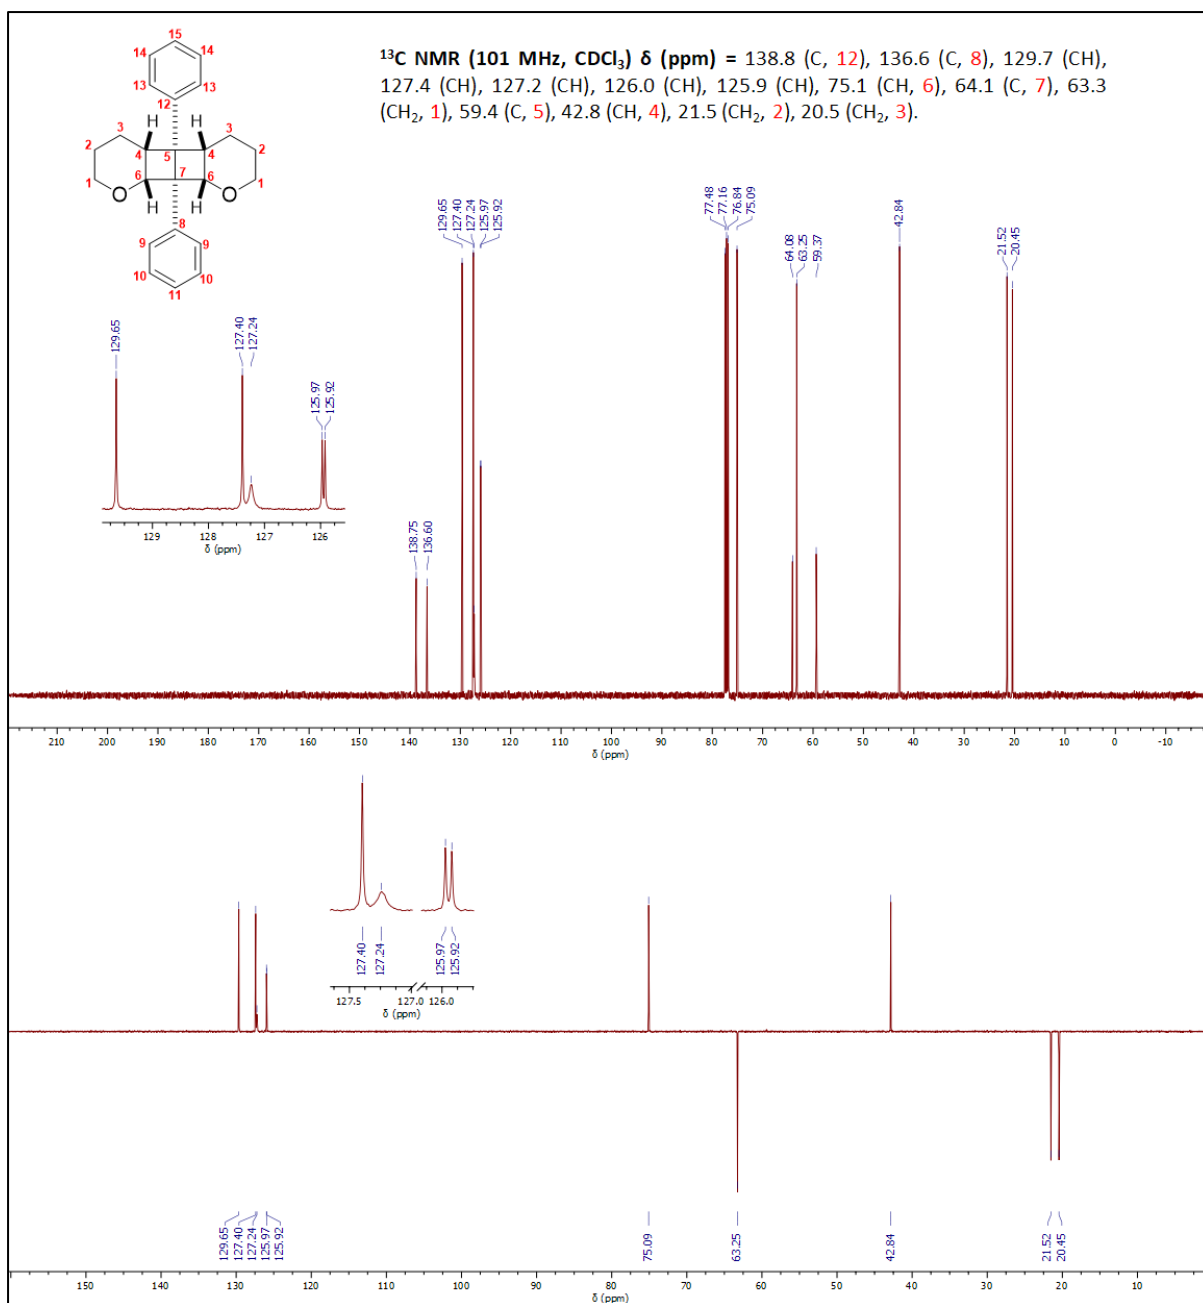

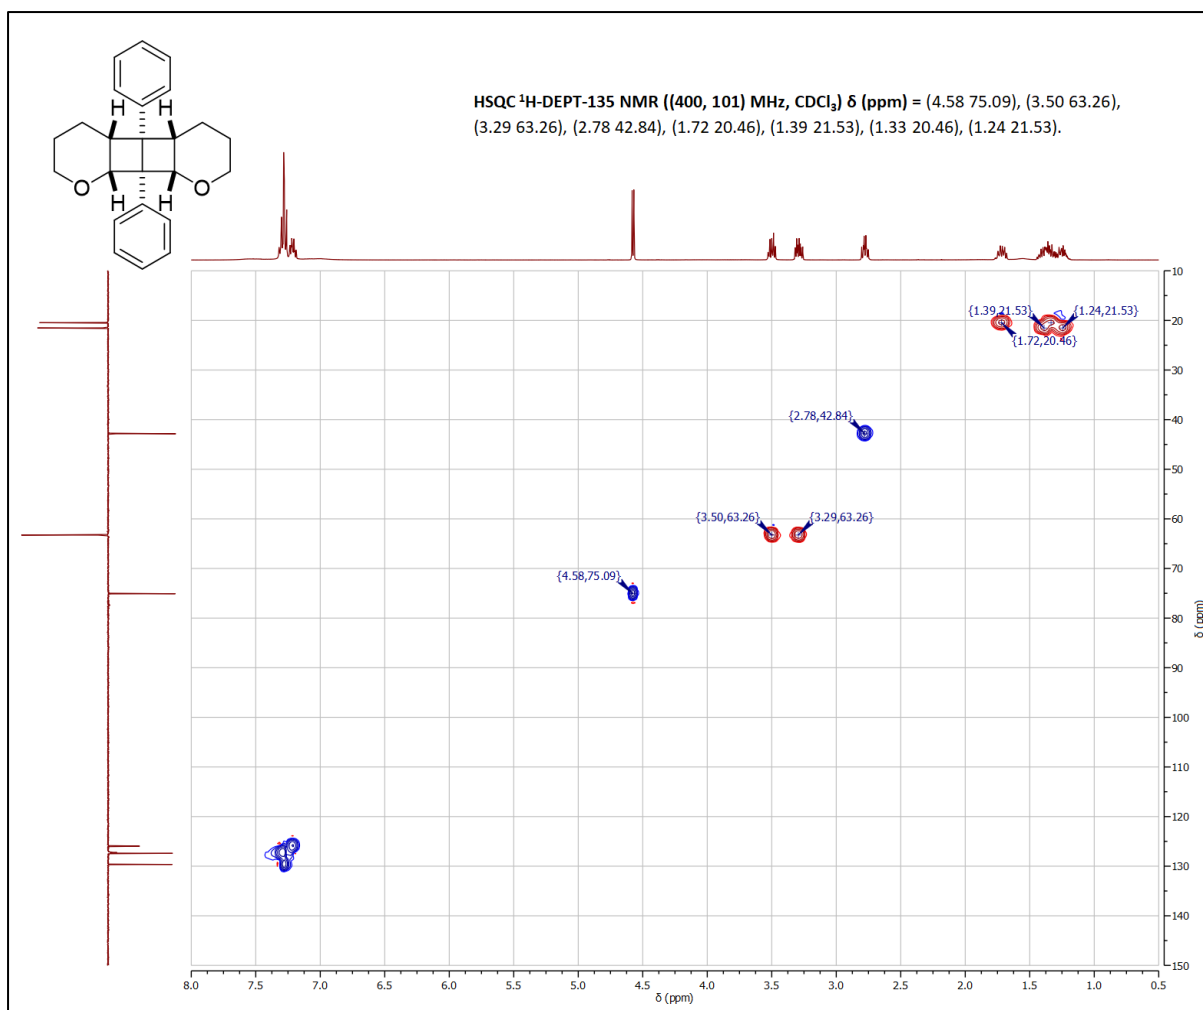



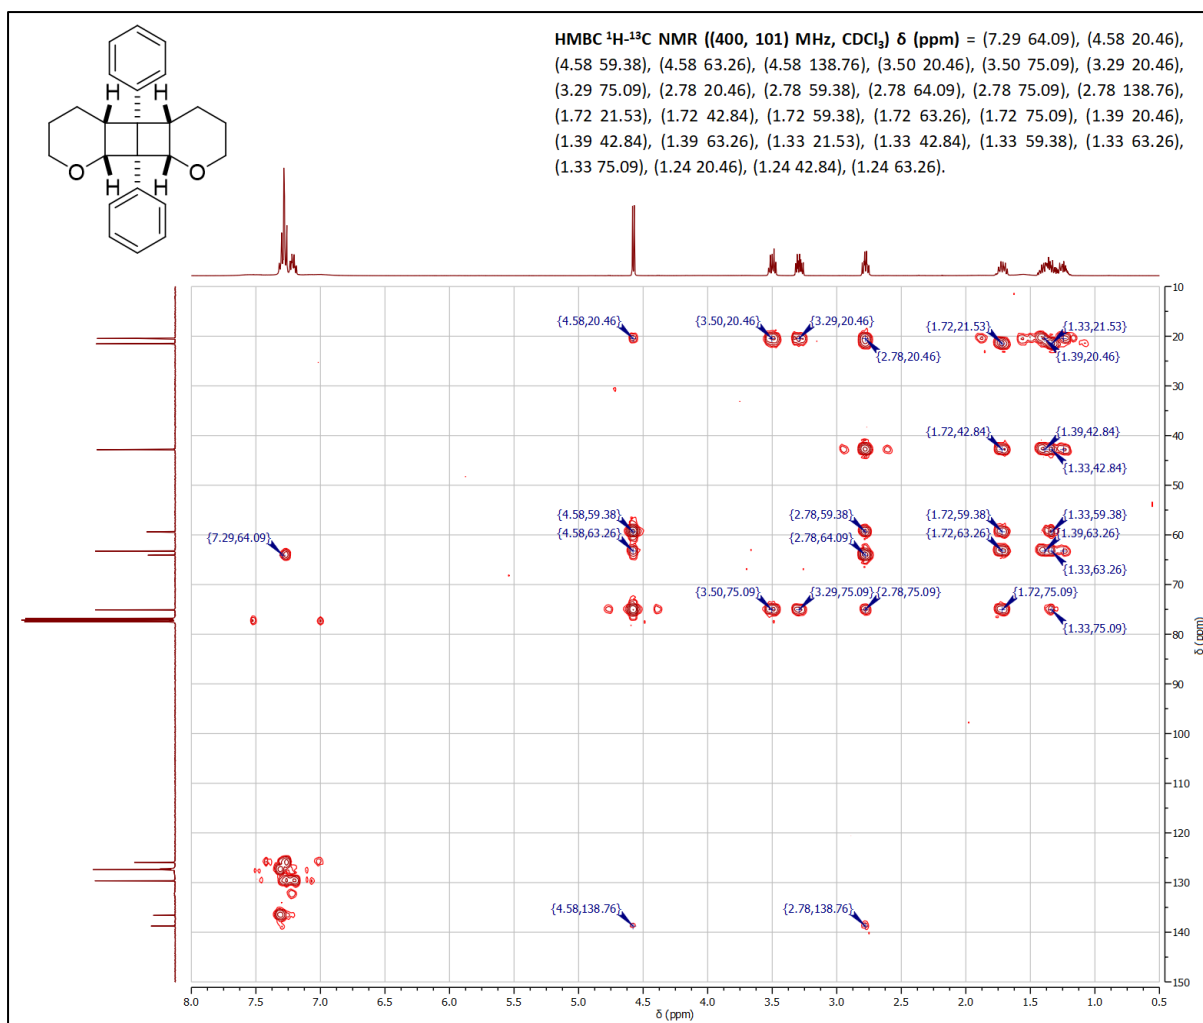

Figure S 44. HMBC NMR spectrum of (5 $\alpha$ ,6 $\beta$ ,7 $\alpha$ ,12 $\alpha$ ,13 $\beta$ ,14 $\alpha$ )-1,11-Dioxo-6,13-Diphenyltetracyclo[6.6.0.0<sup>5,14</sup>,0<sup>7,12</sup>]tetradecane (**4**) in  $\text{CDCl}_3$

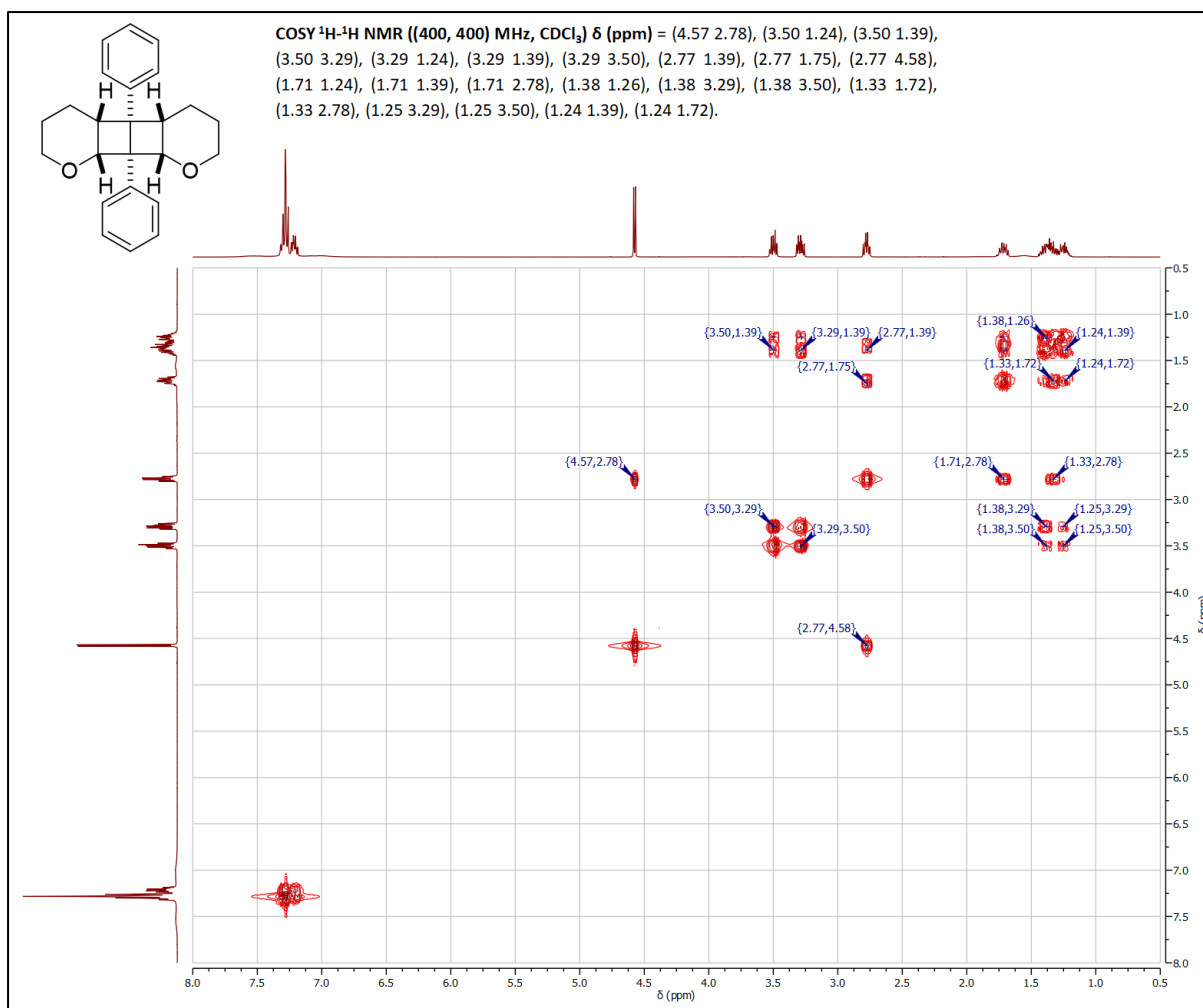

Figure S 45. COSY NMR spectrum of (5 $\alpha$ ,6 $\beta$ ,7 $\alpha$ ,12 $\alpha$ ,13 $\beta$ ,14 $\alpha$ )-1,11-Dioxo-6,13-Diphenyltetracyclo[6.6.0.0<sup>5,14</sup>,0<sup>7,12</sup>]tetradecane (**4**) in CDCl<sub>3</sub>

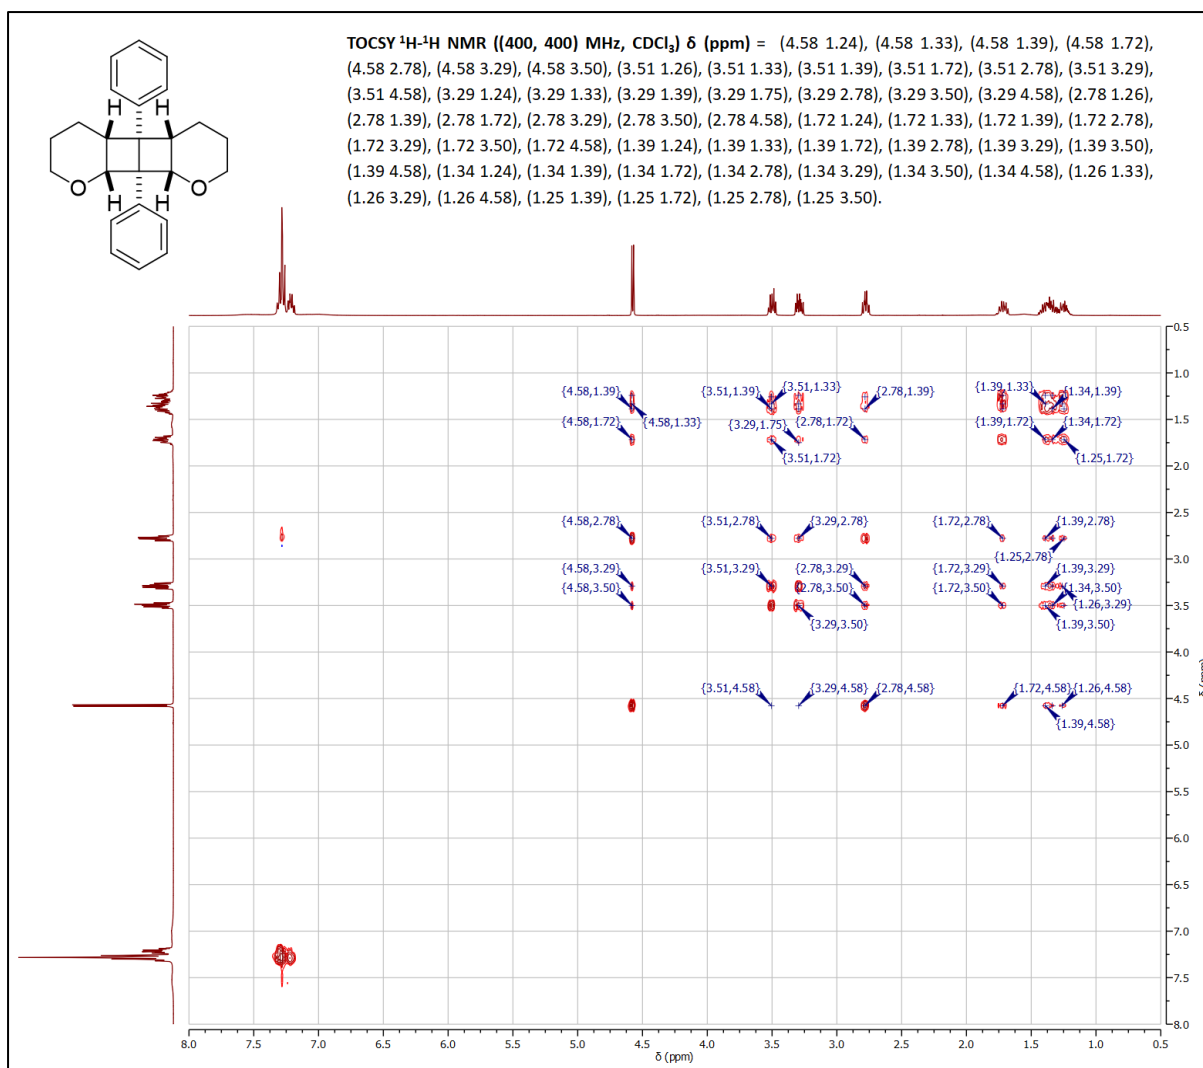

Figure S 46. TOCSY NMR spectrum of (5 $\alpha$ ,6 $\beta$ ,7 $\alpha$ ,12 $\alpha$ ,13 $\beta$ ,14 $\alpha$ )-1,11-Dioxo-6,13-Diphenyltetracyclo[6.6.0.0<sup>5,14</sup>,0<sup>7,12</sup>]tetradecane (**4**) in  $\text{CDCl}_3$

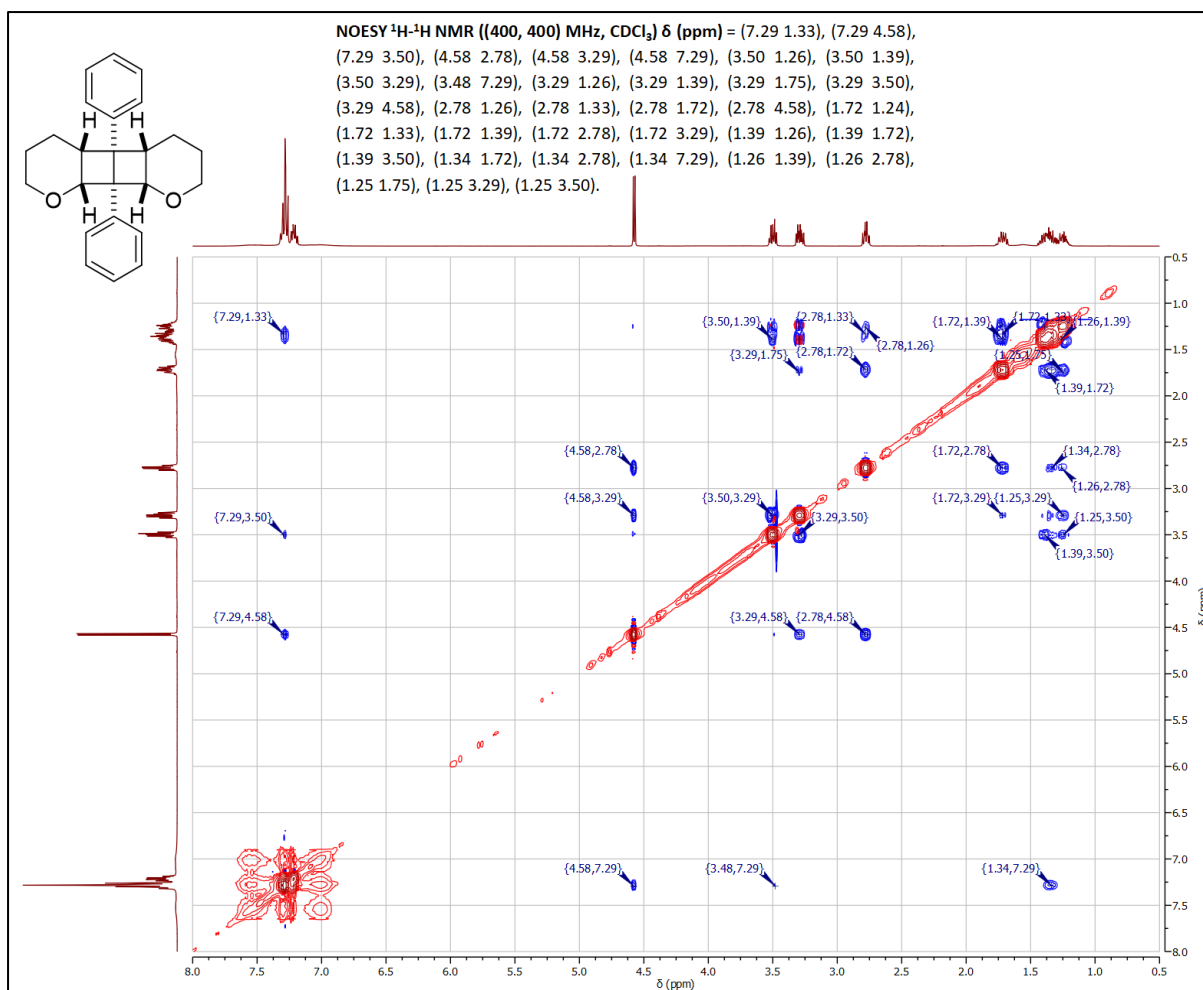

$^1\text{H}$  NMR (500 MHz, 373 K,  $\text{DMSO-d}_6$ )  $\delta$  (ppm) = 7.28 (m, 2H, **9**), 7.22 – 7.17 (m, 5H, [**10**, **11**, **12**]), 7.16 – 7.10 (m, 3H, [**13**, **14**]), 4.50 (d,  $^3J_{\text{H8-H7}}=5.4$  Hz, 2H, **8**), 3.40 (ddd,  $^2J_{\text{H2-H1}}=11.2$ ,  $^3J_{\text{H2-H3}}=6.6$ ,  $^3J_{\text{H2-H4}}=5.8$  Hz, 2H, **2**), 3.24 (ddd,  $^2J_{\text{H1-H2}}=11.1$ ,  $^3J_{\text{H1-H3}}=7.4$ ,  $^3J_{\text{H1-H4}}=5.0$  Hz, 2H, **1**), 2.80 (ddd,  $^3J_{\text{H7-H6}}=7.9$ ,  $^3J_{\text{H7-H5}}=7.8$ ,  $^3J_{\text{H7-H8}}=5.5$  Hz, 2H, **7**), 1.66 (m, 2H, [**6/5**]), 1.39 – 1.30 (m, 2H, [**5/6**]), 1.26 – 1.16 (m, 4H, [**3**, **4**]).

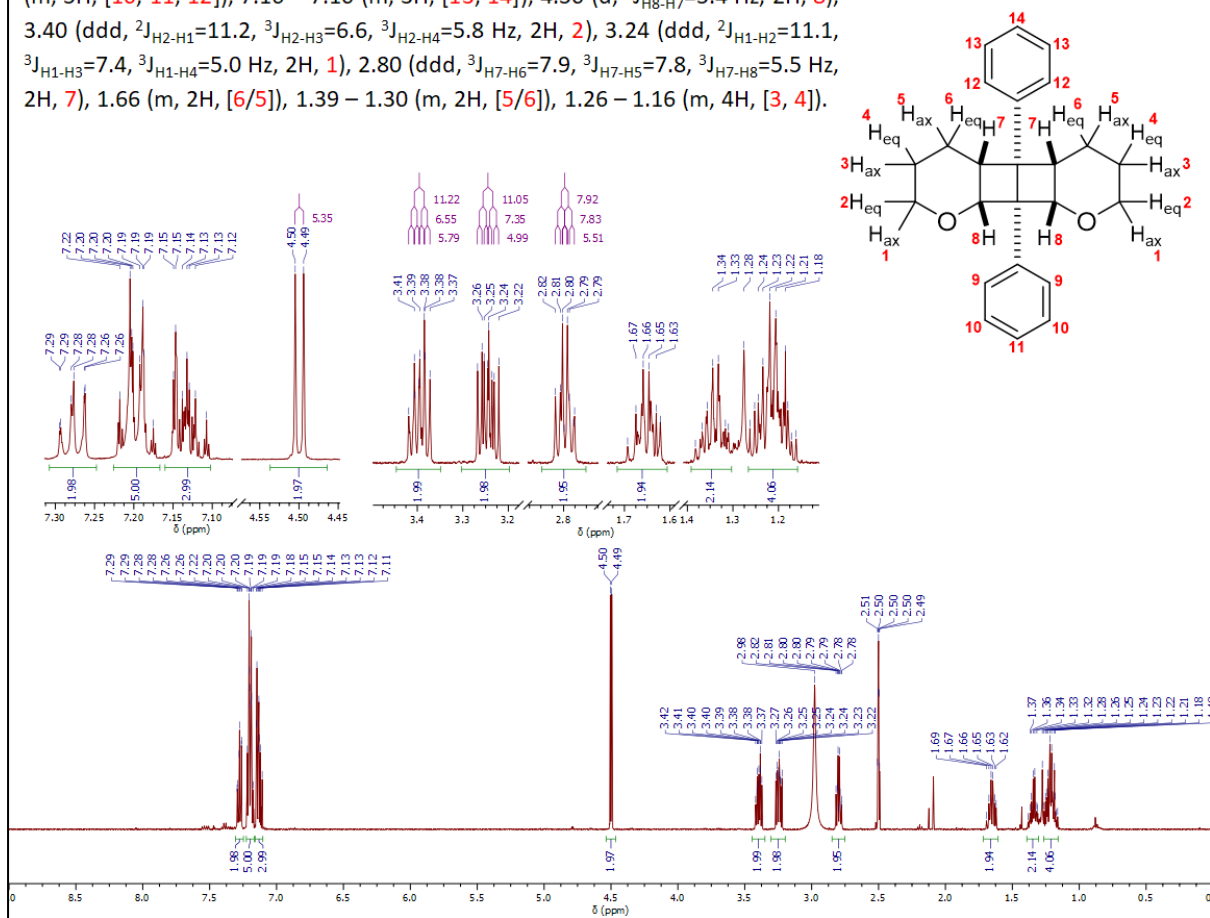

Figure S 48.  $^1\text{H}$  NMR spectrum of (5 $\alpha$ ,6 $\beta$ ,7 $\alpha$ ,12 $\alpha$ ,13 $\beta$ ,14 $\alpha$ )-1,11-Dioxo-6,13-diphenyltetracyclo[6.6.0.0 $^{5,14}$ .0 $^{7,12}$ ]tetradecane (**4**) in  $\text{DMSO-d}_6$  at 100 °C.

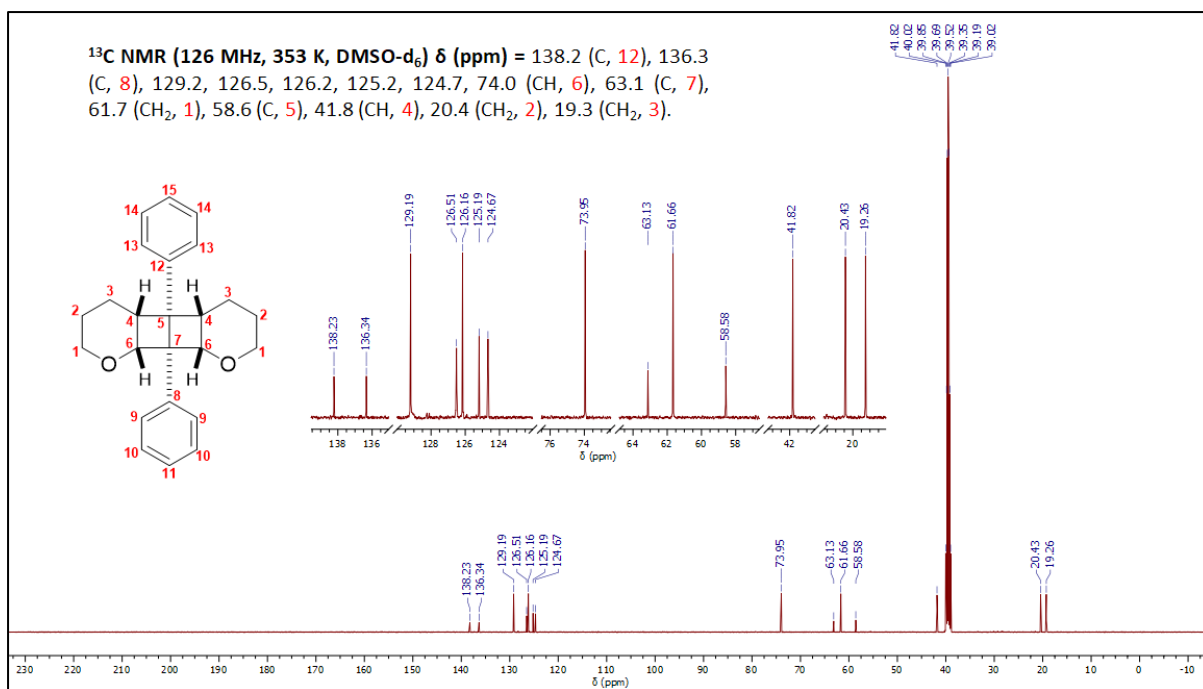

Figure S 49.  $^{13}\text{C}$  NMR spectrum of (5 $\alpha$ ,6 $\beta$ ,7 $\alpha$ ,12 $\alpha$ ,13 $\beta$ ,14 $\alpha$ )-1,11-Dioxa-6,13-diphenyltetracyclo[6.6.0.0<sup>5,14</sup>.0<sup>7,12</sup>]tetradecane (**4**) in  $\text{DMSO-d}_6$  at 80 °C.

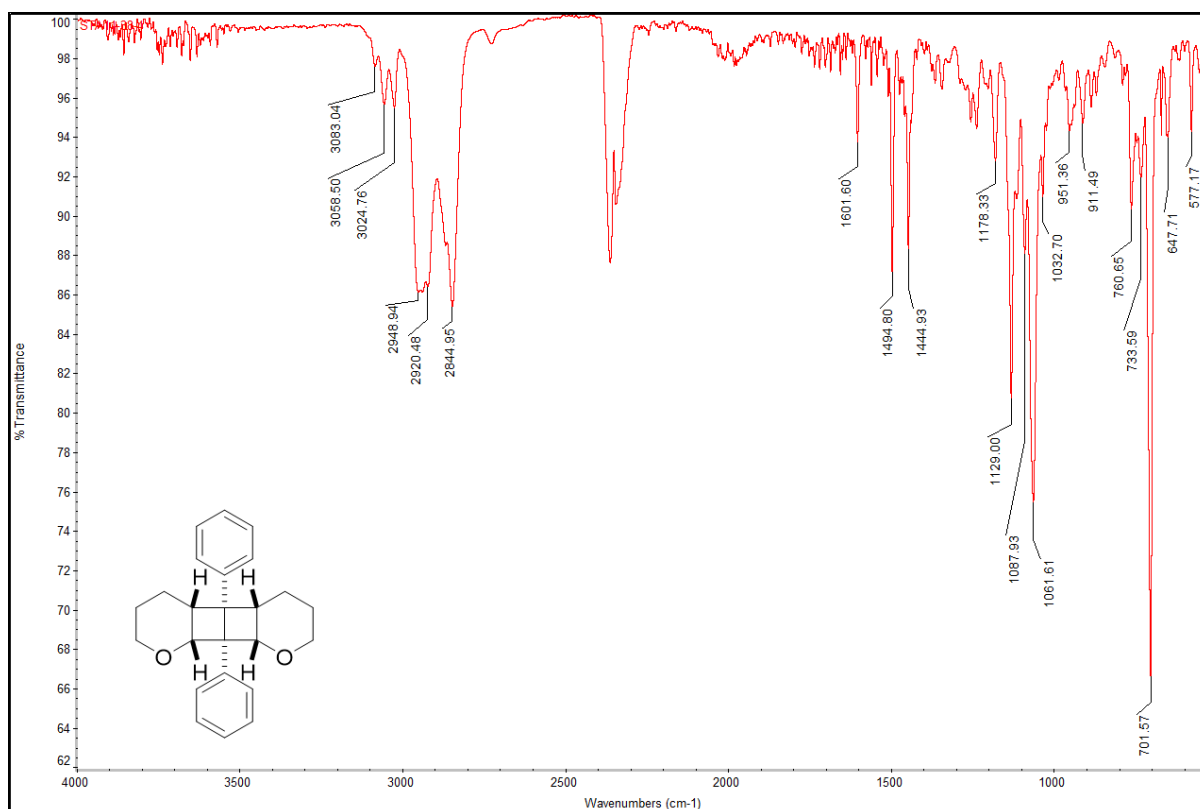

Figure S 50. FT-ATR-IR spectrum of neat of (5 $\alpha$ ,6 $\beta$ ,7 $\alpha$ ,12 $\alpha$ ,13 $\beta$ ,14 $\alpha$ )-1,11-Dioxa-6,13-diphenyltetracyclo[6.6.0.0<sup>5,14</sup>.0<sup>7,12</sup>]tetradecane (**4**).

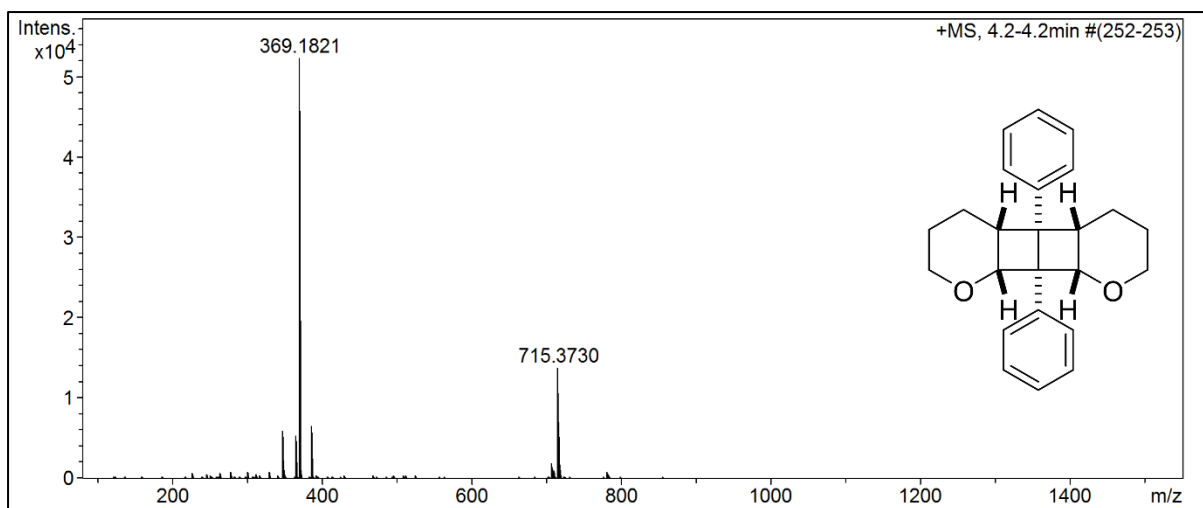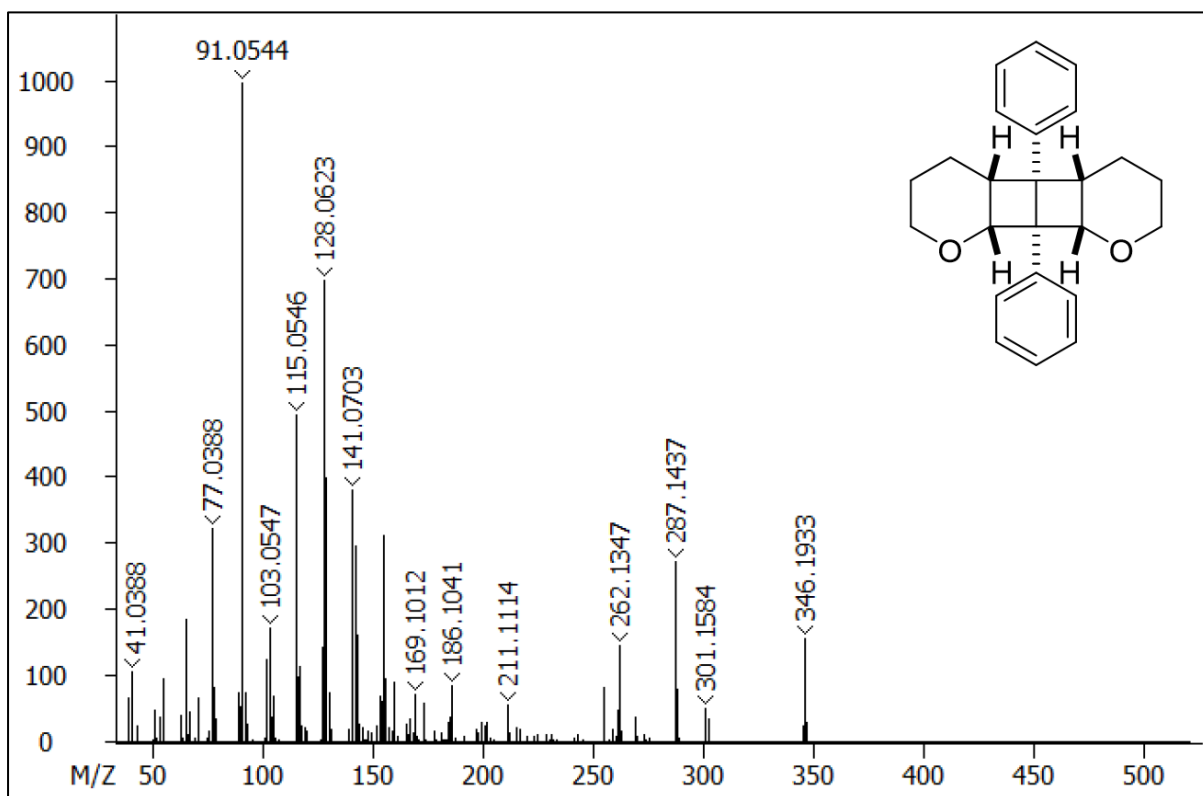

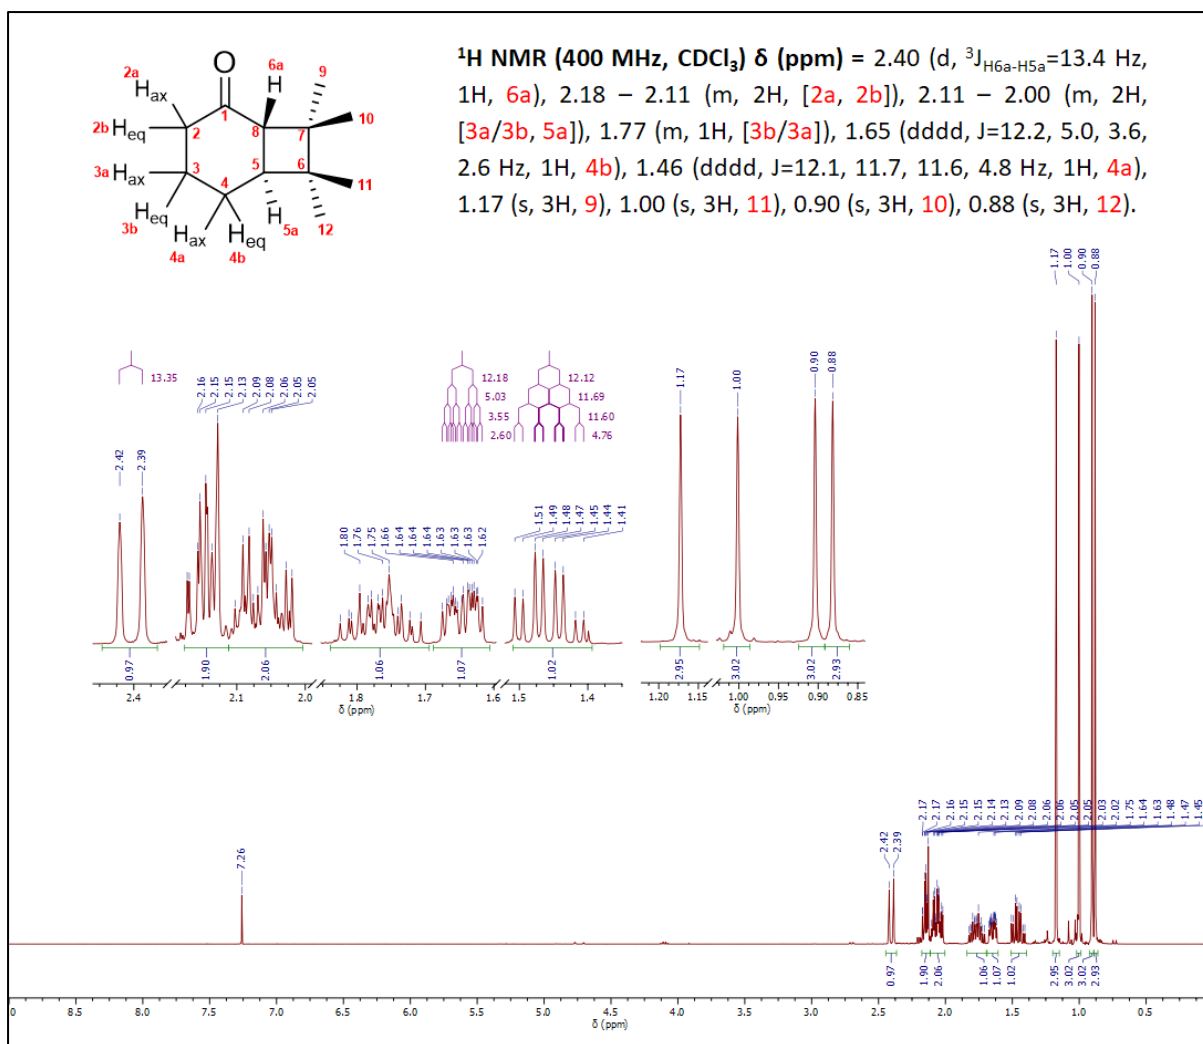

Figure S 53. <sup>1</sup>H NMR spectrum of trans-7,7,8,8-tetramethylbicyclo[4.2.0]octan-2-one (5).



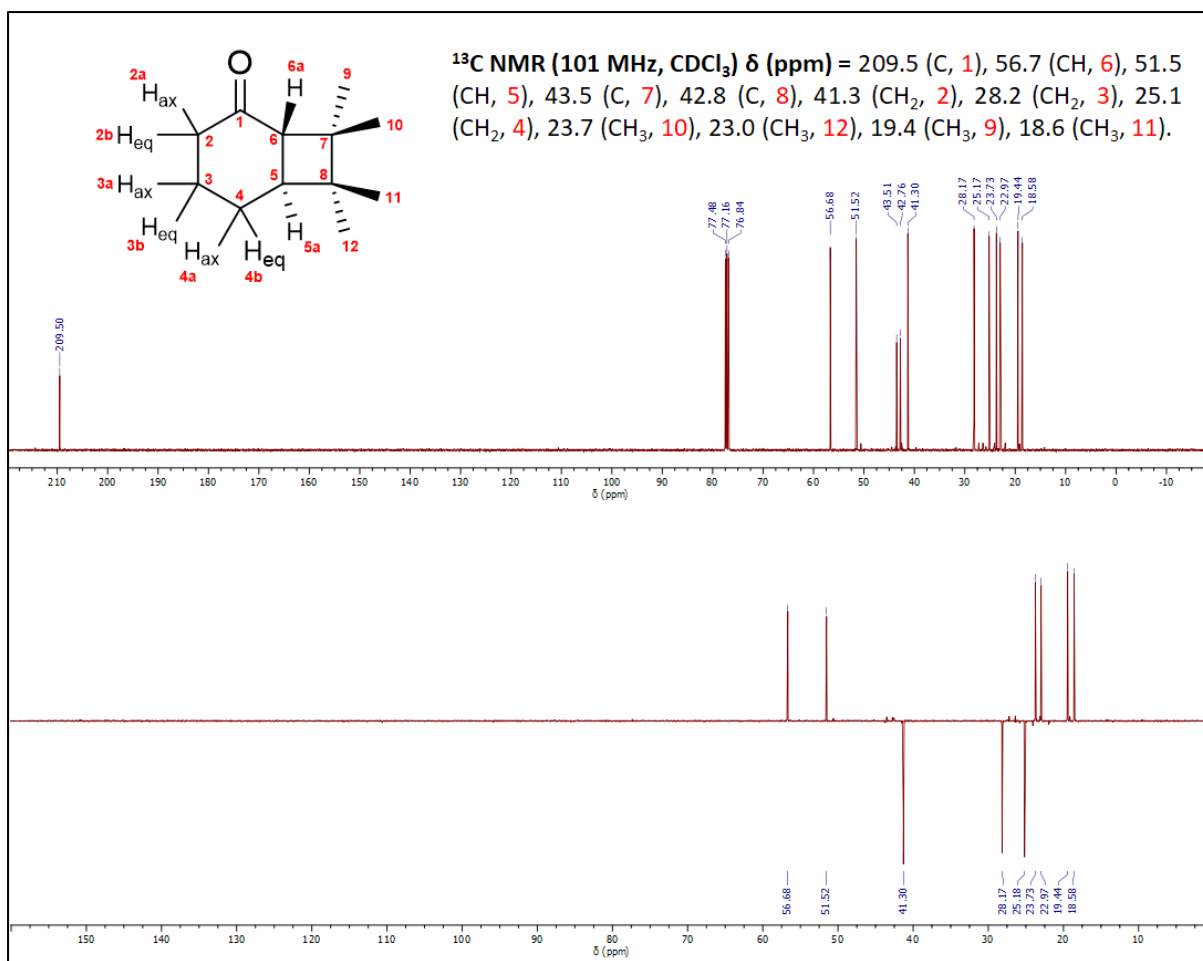

Figure S 54. <sup>13</sup>C (top) and DEPT-135 (bottom) NMR spectrum of *trans*-7,7,8,8-tetramethylbicyclo[4.2.0]octan-2-one (5).

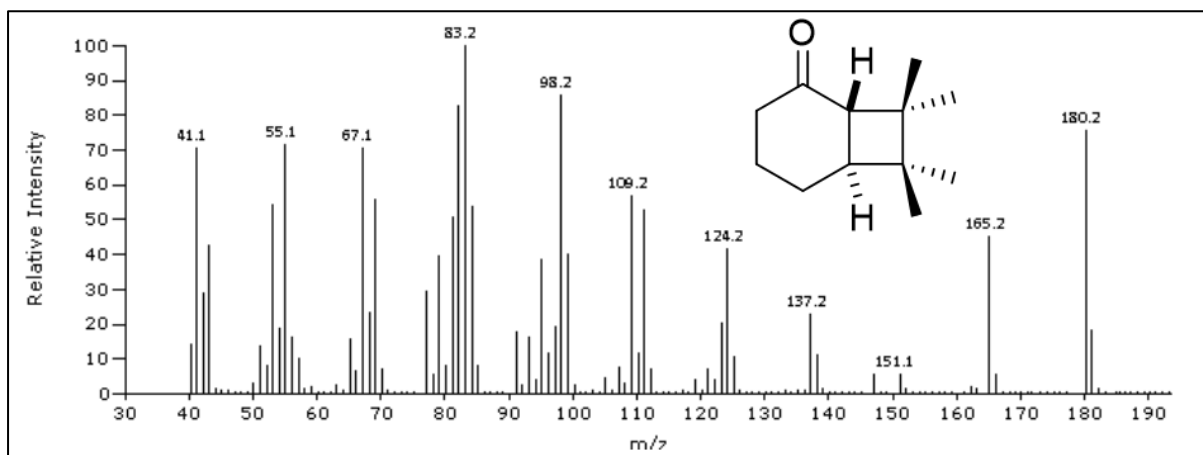

Figure S 55. Electron ionisation mass spectrum of *trans*-7,7,8,8-tetramethylbicyclo[4.2.0]octan-2-one (5).

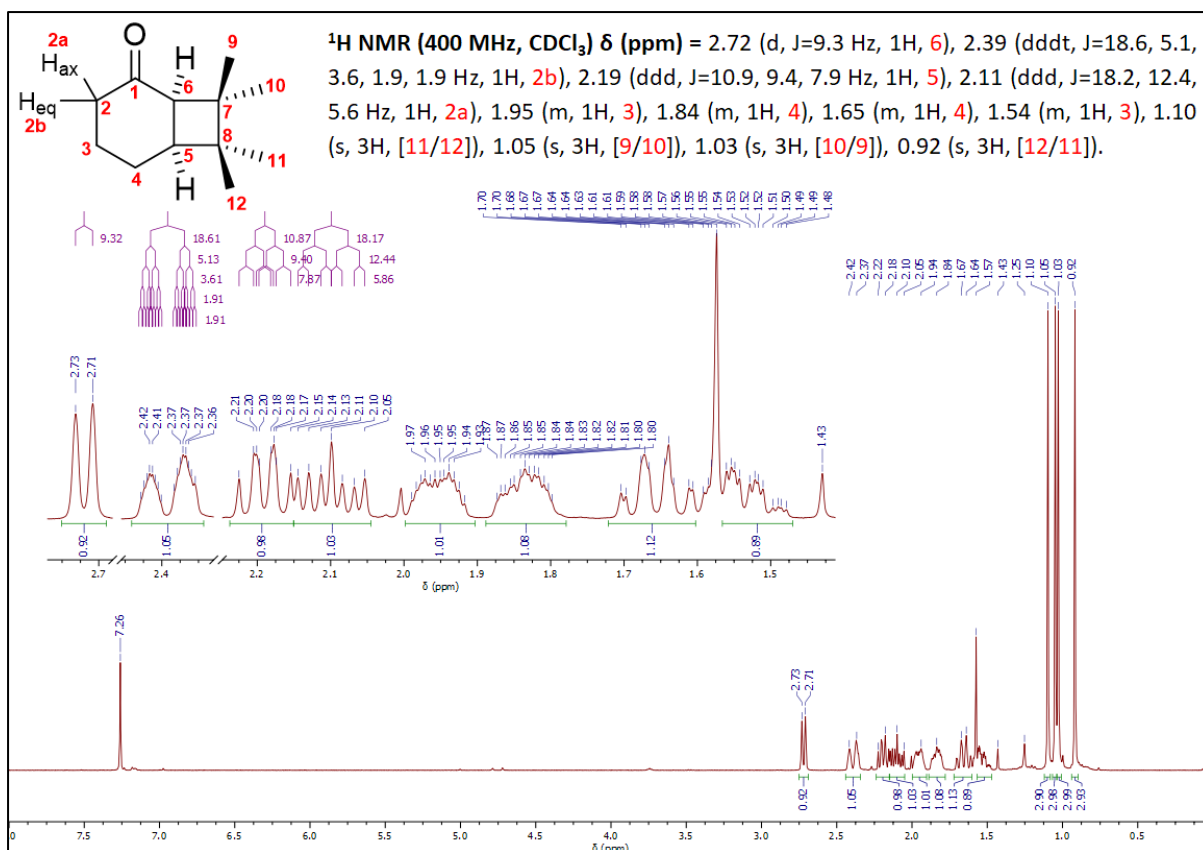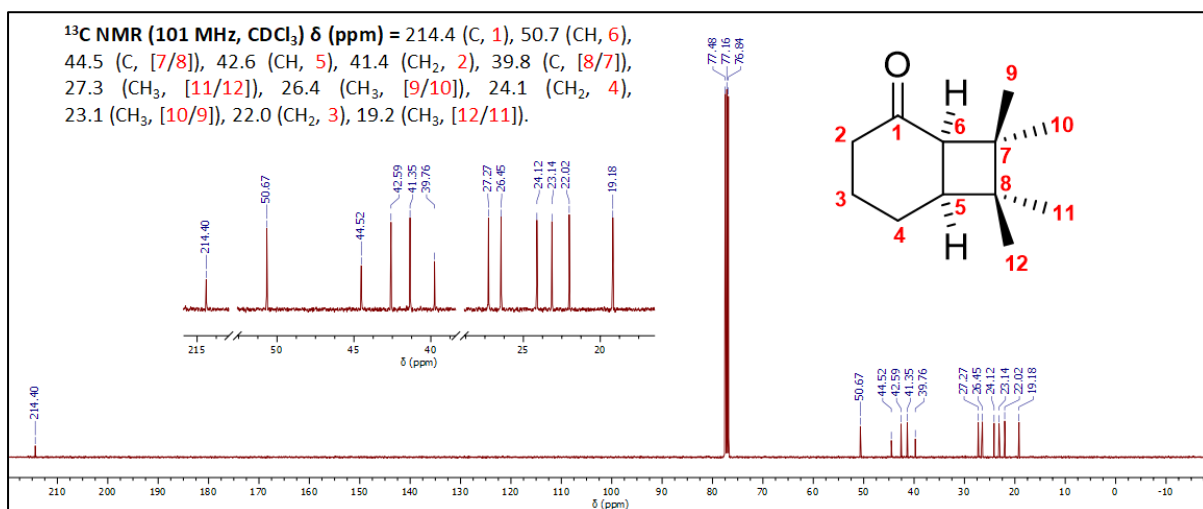

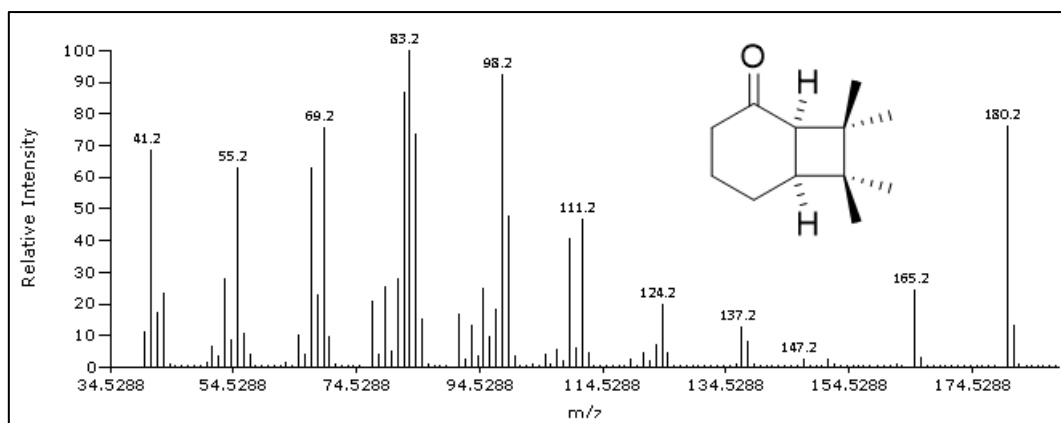

Figure S 58. Electron ionisation mass spectrum of *cis*-7,7,8,8-tetramethylbicyclo[4.2.0]octan-2-one (**6**).

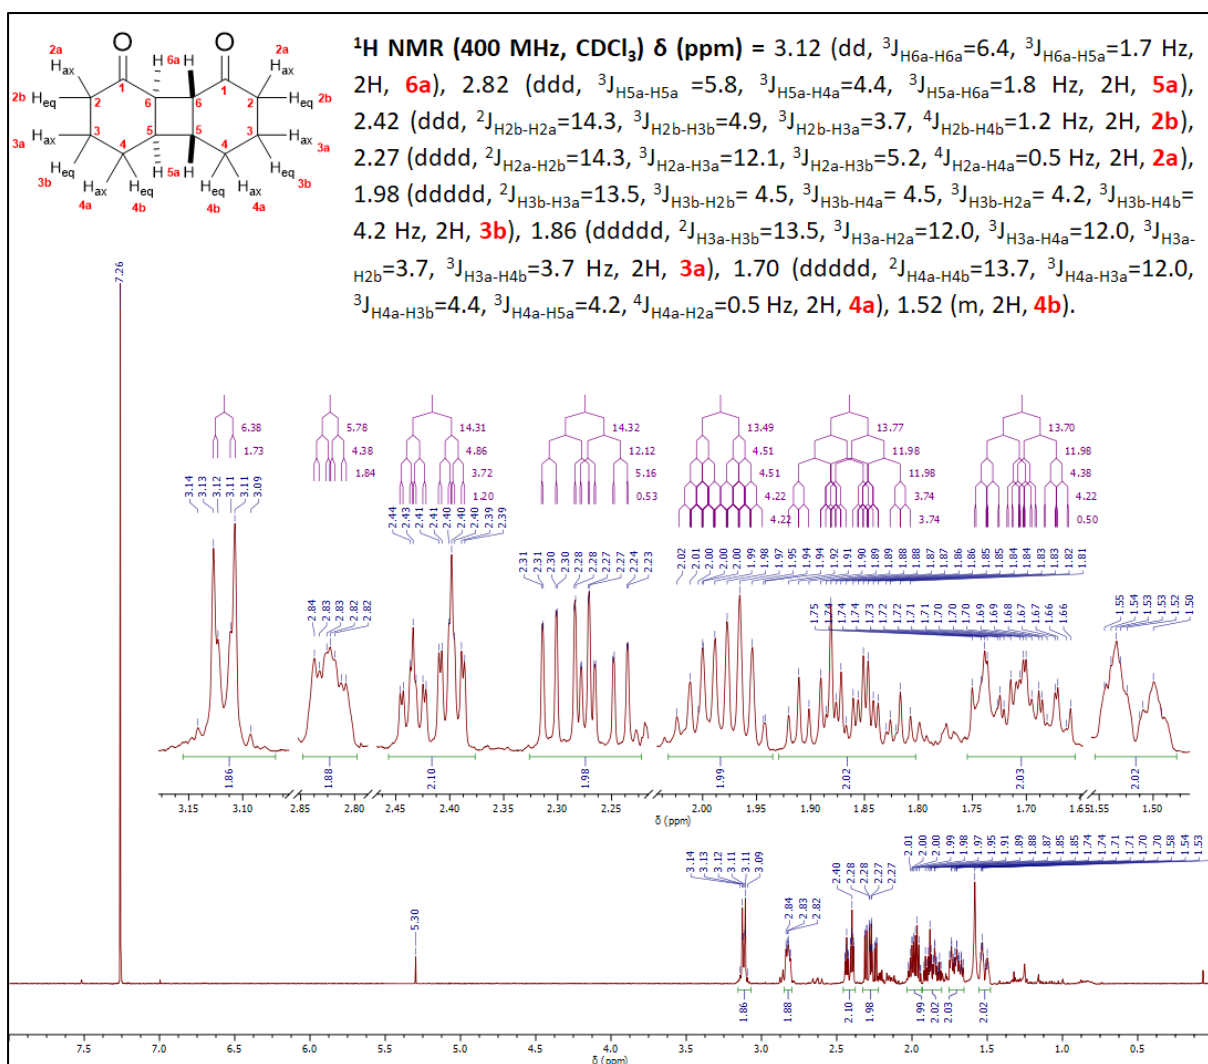

Figure S 59. <sup>1</sup>H NMR spectrum of *cis*-anti-*cis*-tricyclo[6.4.0.0<sup>2,7</sup>]dodecane-3,12-dione (**7**).

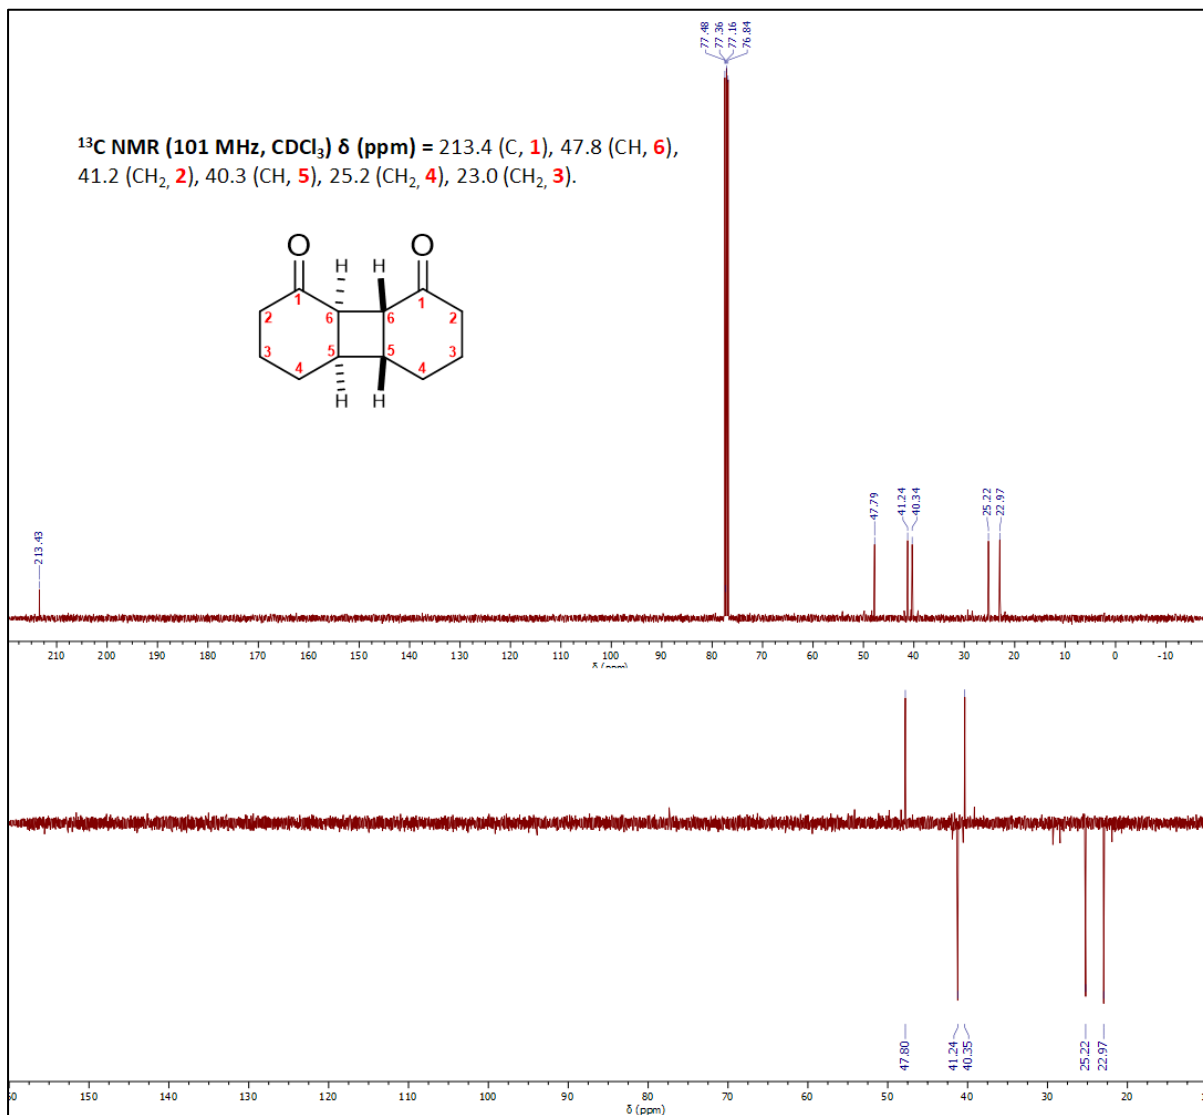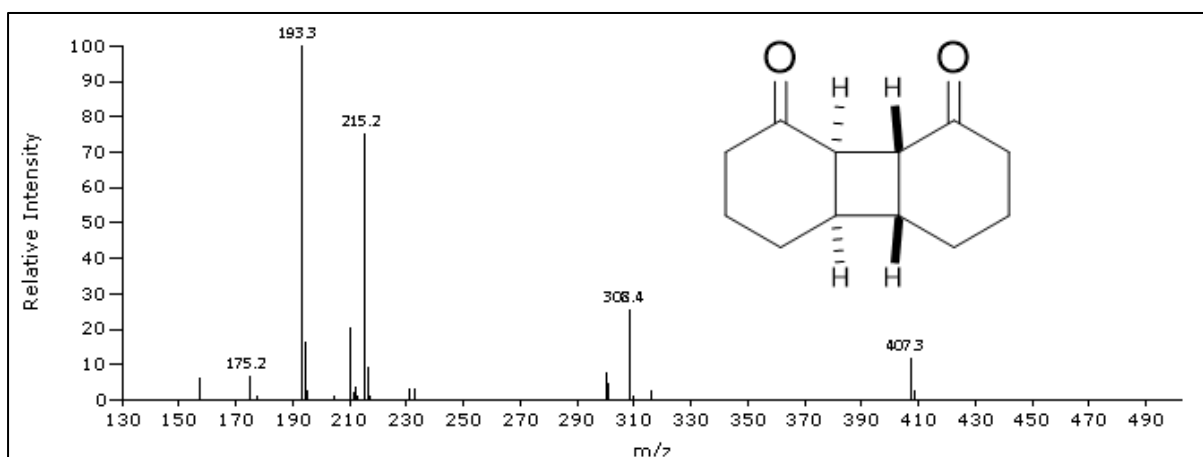

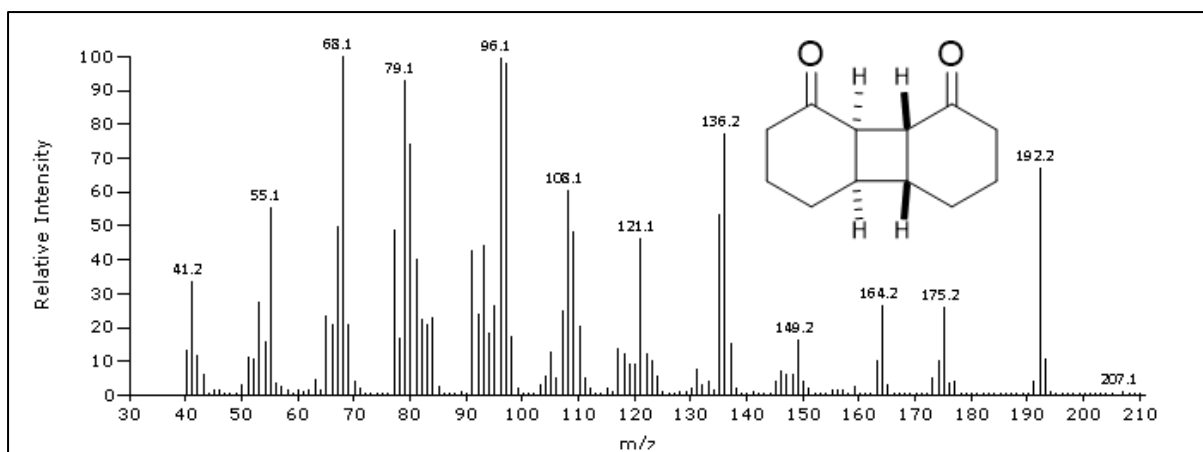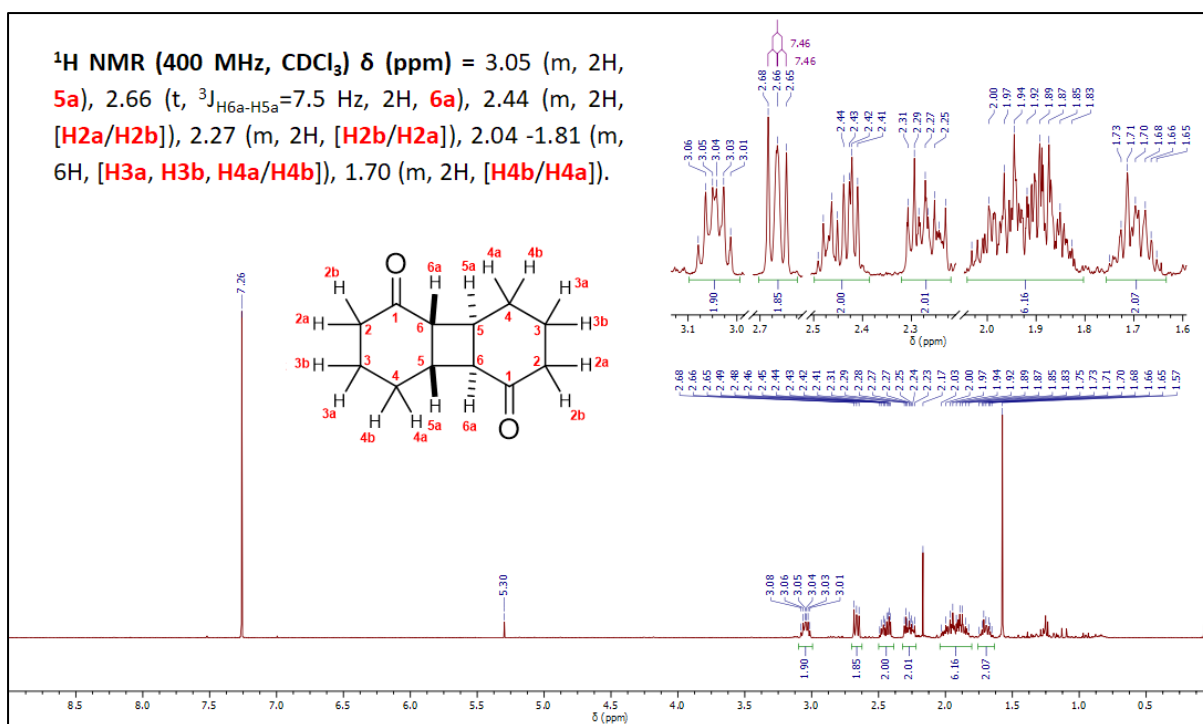

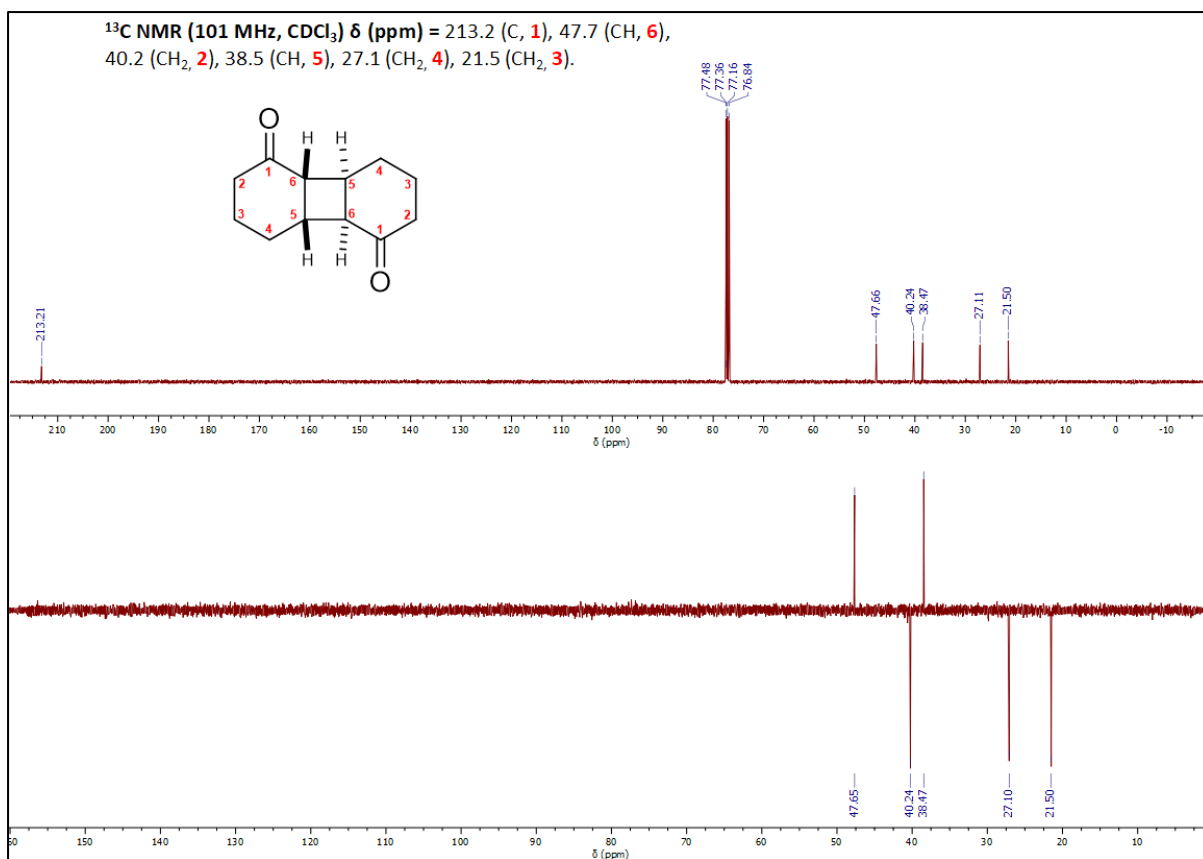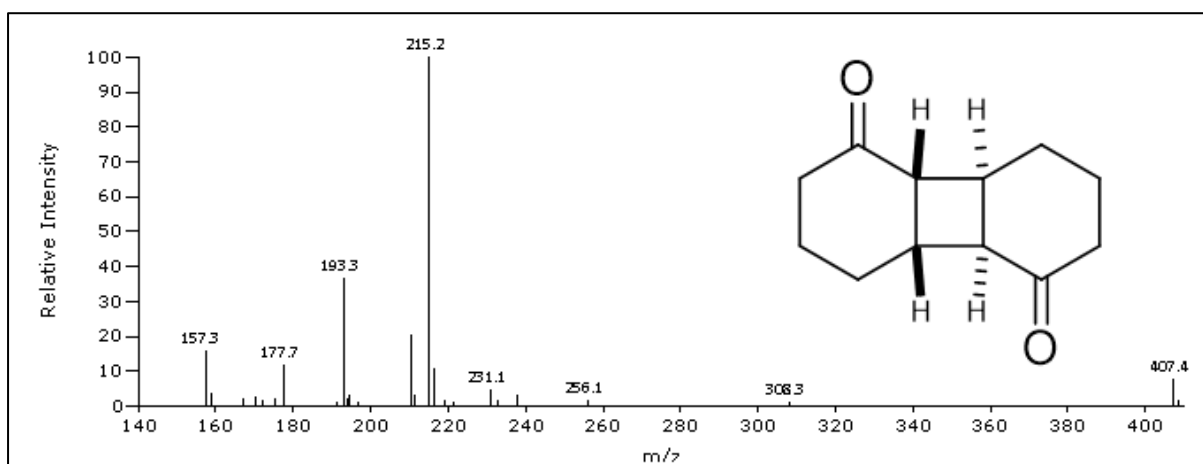

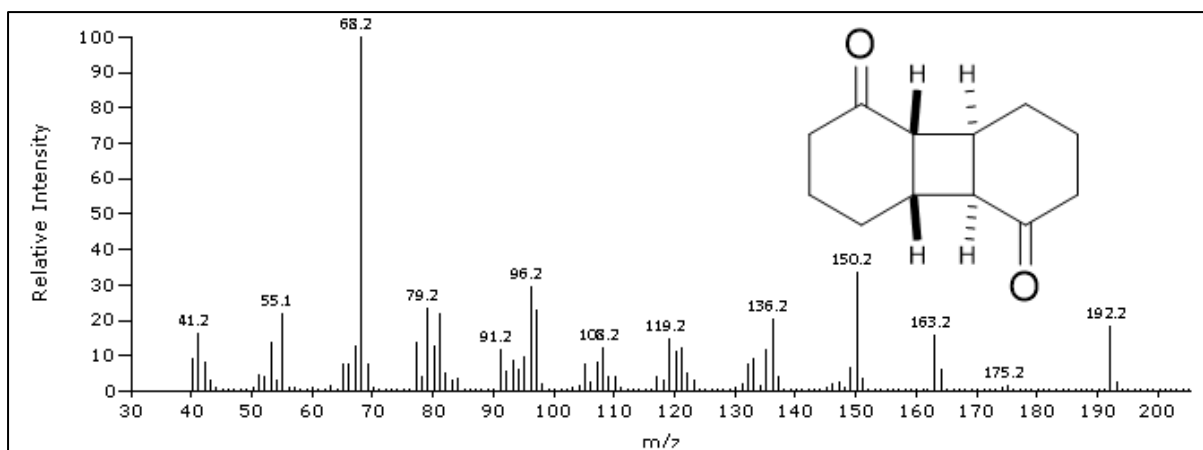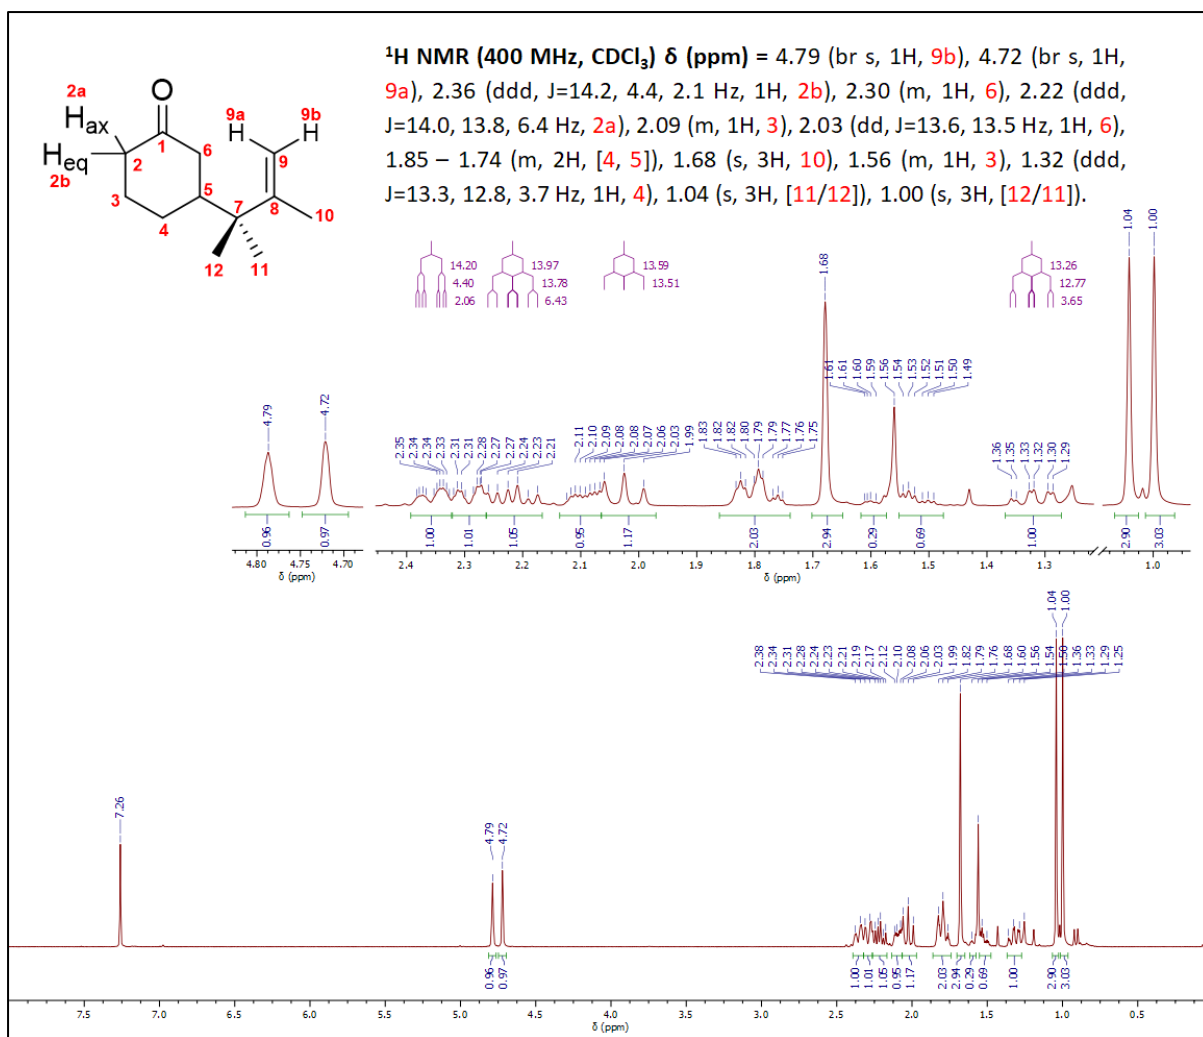

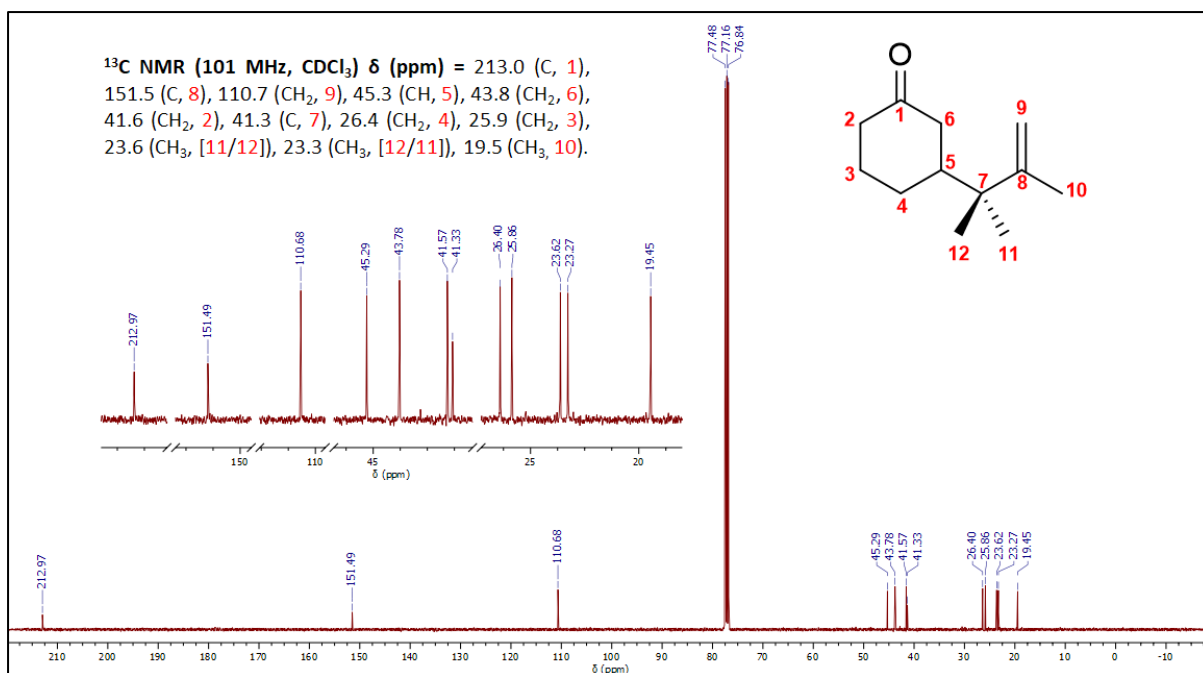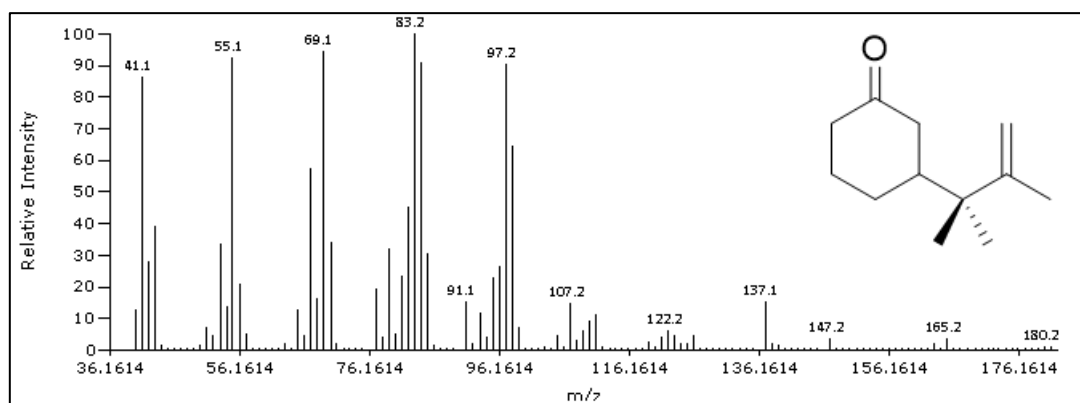



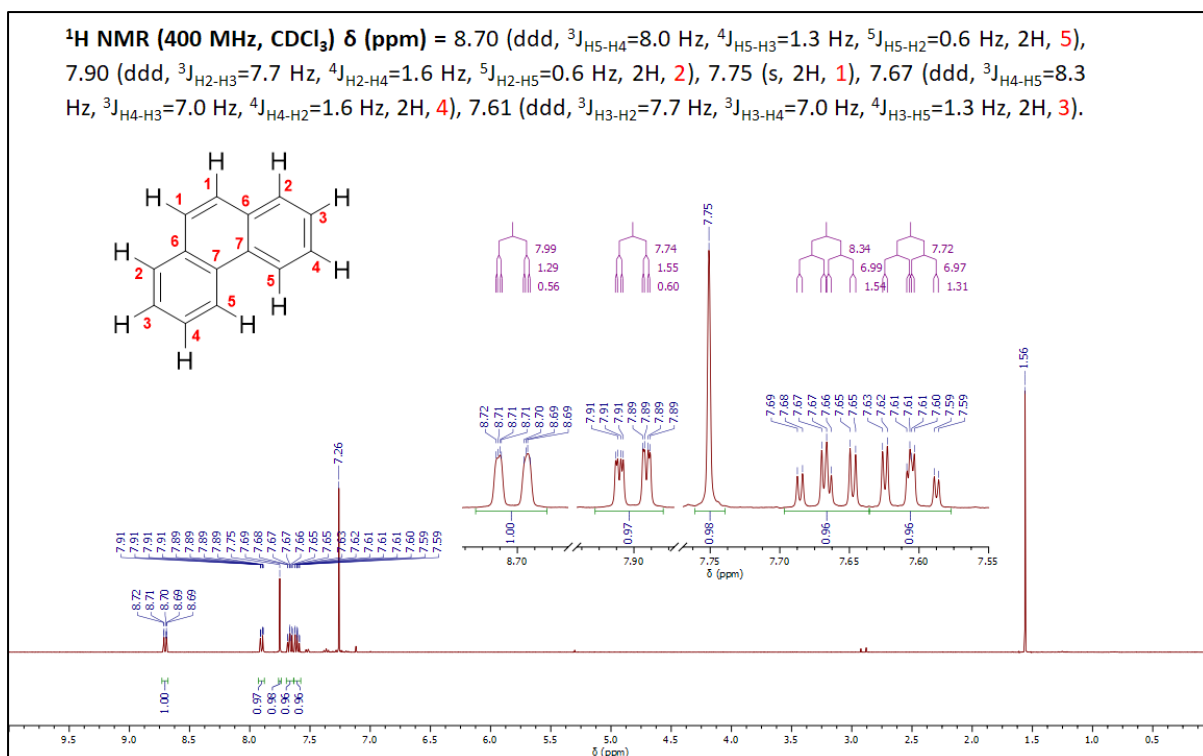

Figure S 70.  $^1\text{H}$  NMR spectrum of phenanthrene (**10**).

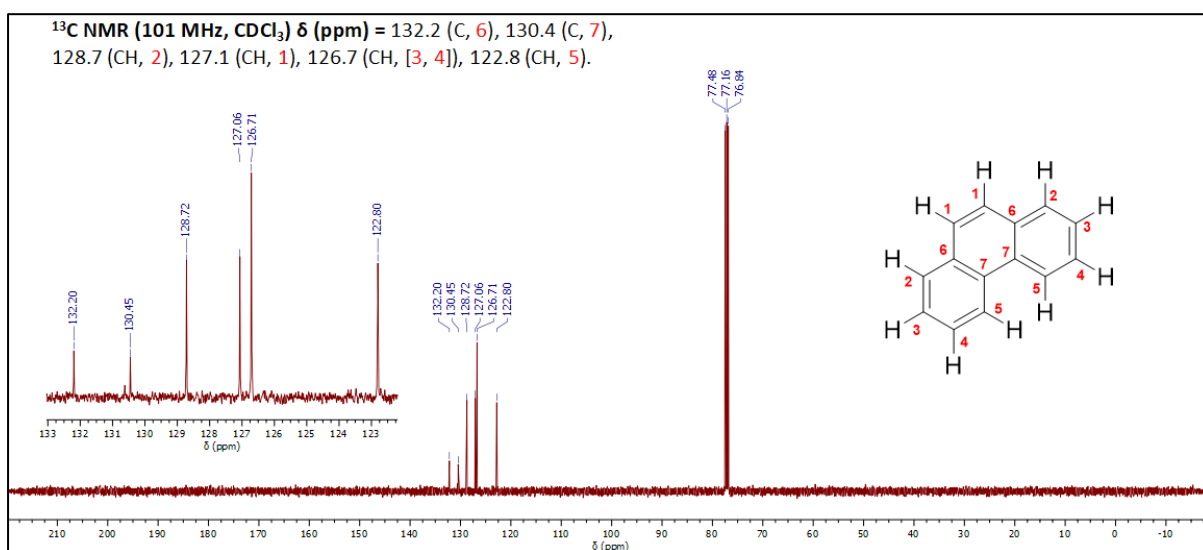

Figure S 71.  $^{13}\text{C}$  NMR spectrum of phenanthrene (**10**).

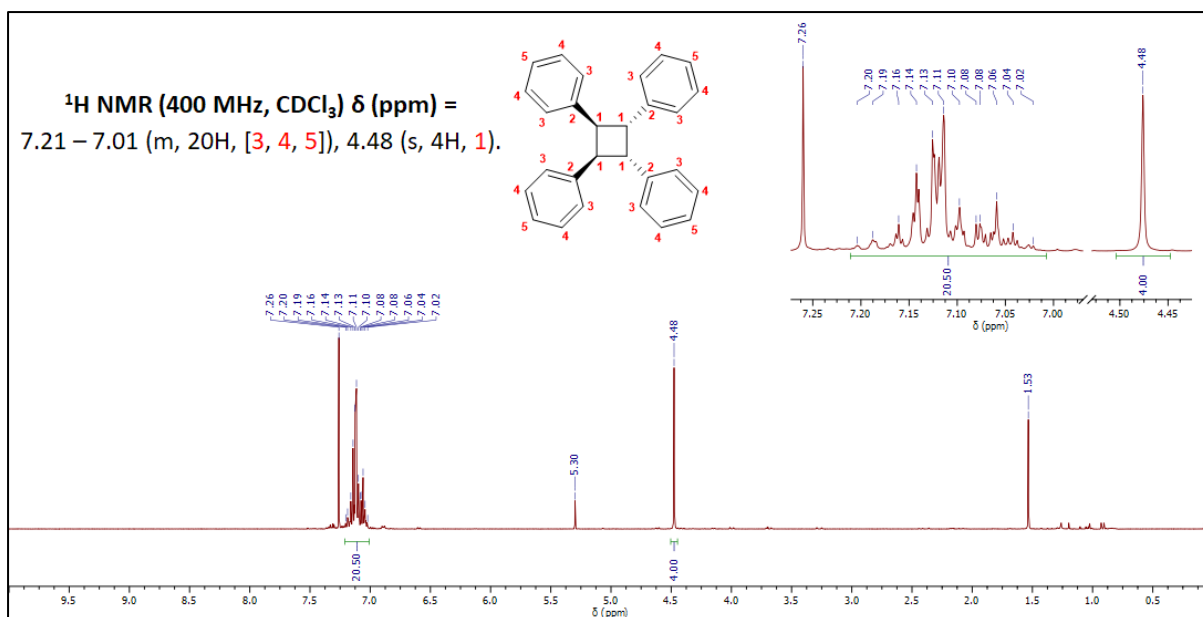

Figure S 72.  $^1\text{H}$  NMR spectrum of (1 $\alpha$ ,2 $\alpha$ ,3 $\beta$ ,4 $\beta$ )-1,2,3,4-Tetraphenylcyclobutane (11).

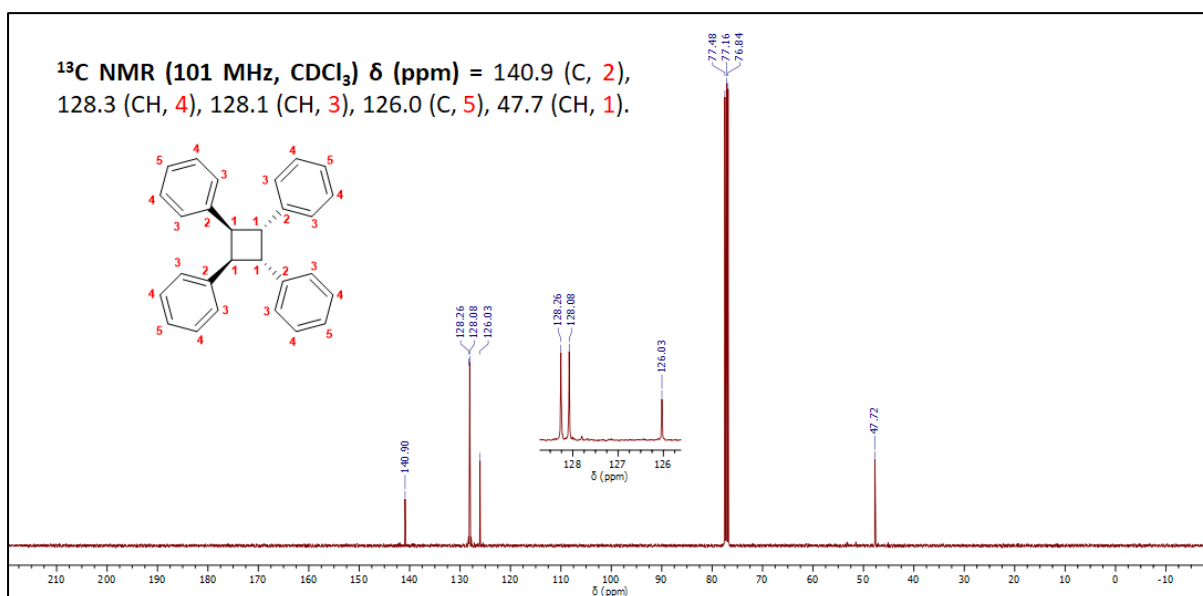

Figure S 73.  $^{13}\text{C}$  NMR spectrum of (1 $\alpha$ ,2 $\alpha$ ,3 $\beta$ ,4 $\beta$ )-1,2,3,4-Tetraphenylcyclobutane (11).

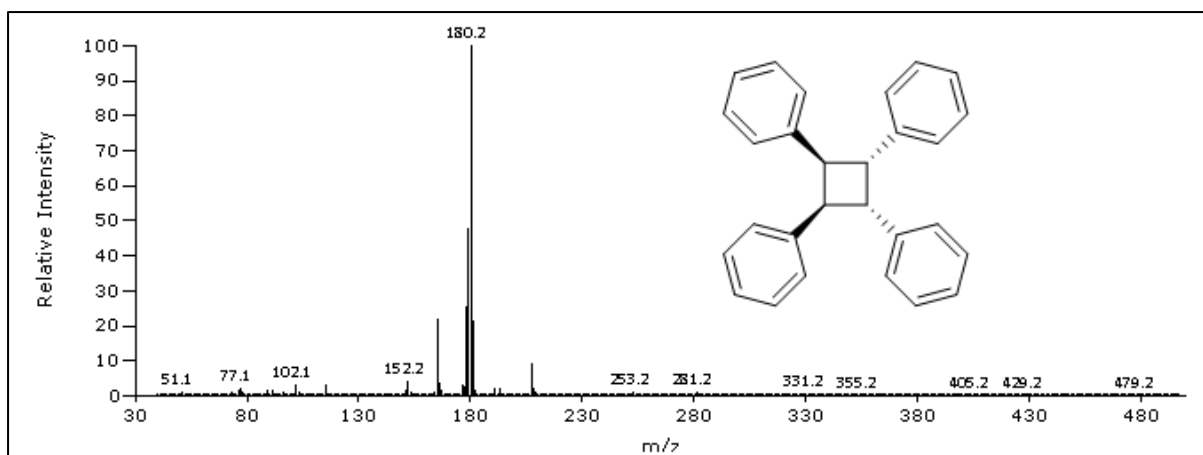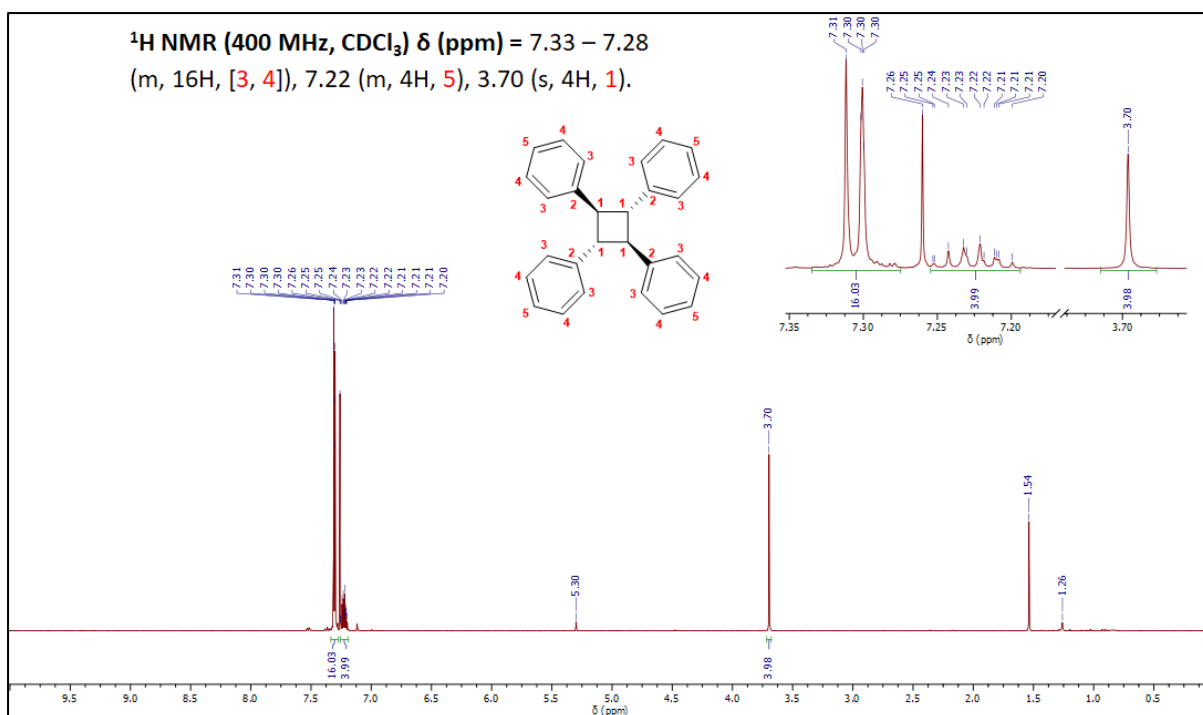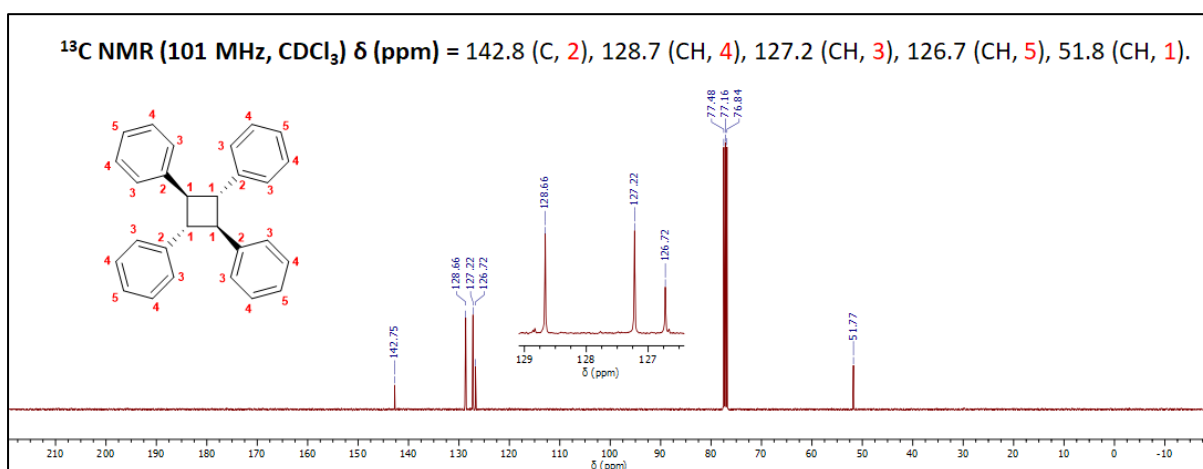

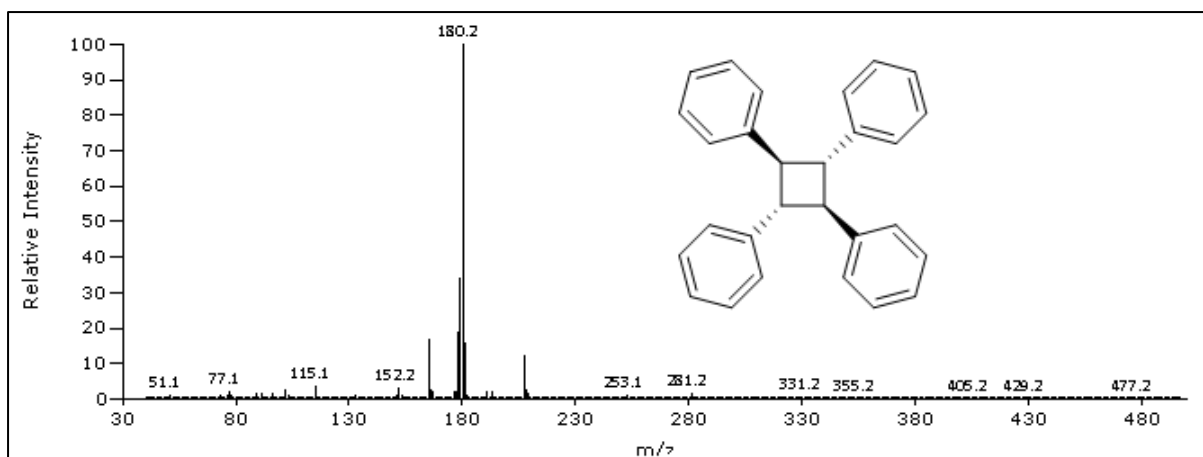

Figure S 77. Electron ionisation mass spectrum of (1 $\alpha$ ,2 $\beta$ ,3 $\alpha$ ,4 $\beta$ )-1,2,3,4-Tetraphenylcyclobutane (**12**).

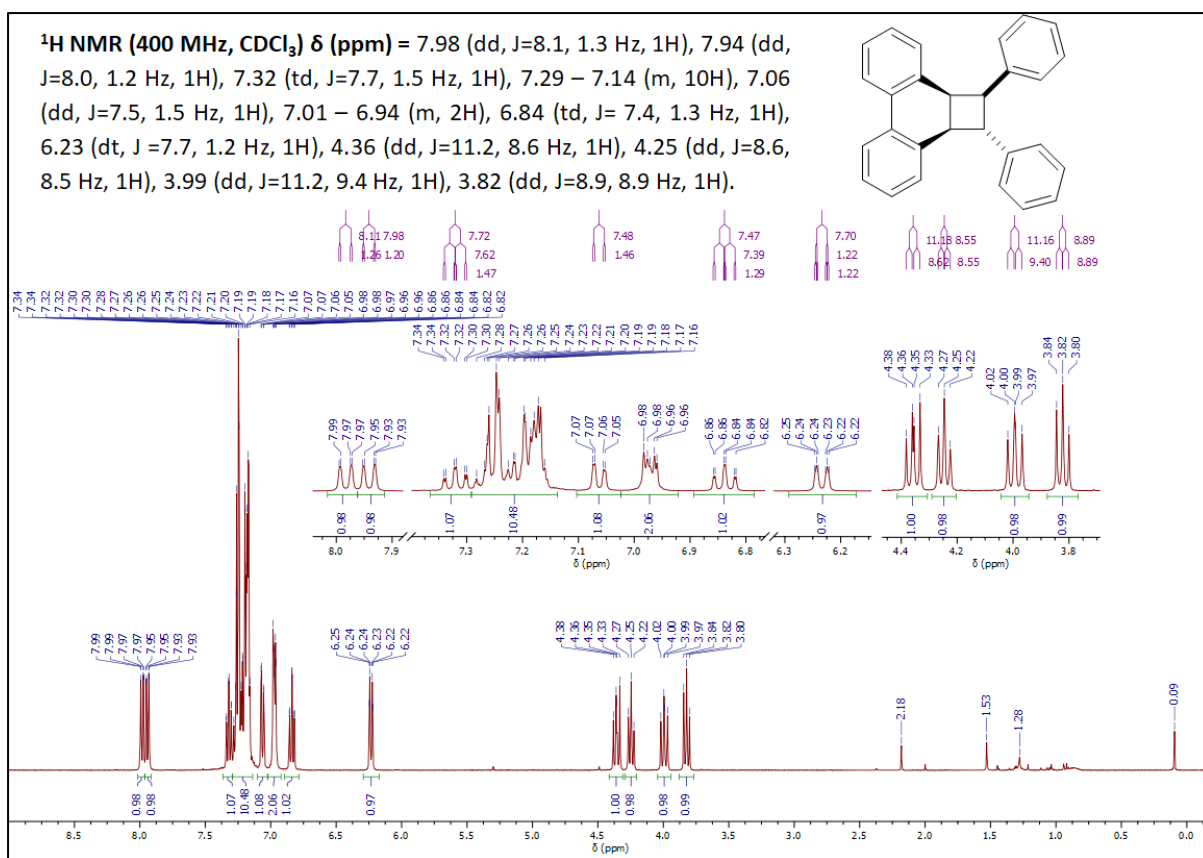

Figure S 78. <sup>1</sup>H NMR spectrum of (1 $\alpha$ ,2 $\beta$ ,2 $\alpha$ R,10bS)-1,2-diphenyl-1,2,2 $\alpha$ ,10b-tetrahydrocyclobuta[[1]phenanthrene (**13**).

$^{13}\text{C}$  NMR (101 MHz,  $\text{CDCl}_3$ )  $\delta$  (ppm) = 142.2, 138.7, 136.0, 133.1, 132.9, 132.3, 132.2, 129.2, 128.5, 128.4, 128.0, 127.8, 127.5, 127.0, 126.8, 126.7, 126.6, 123.9, 122.9, 53.2, 51.8, 42.7, 40.5.

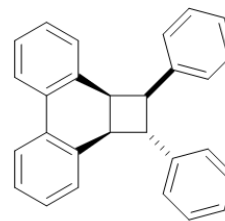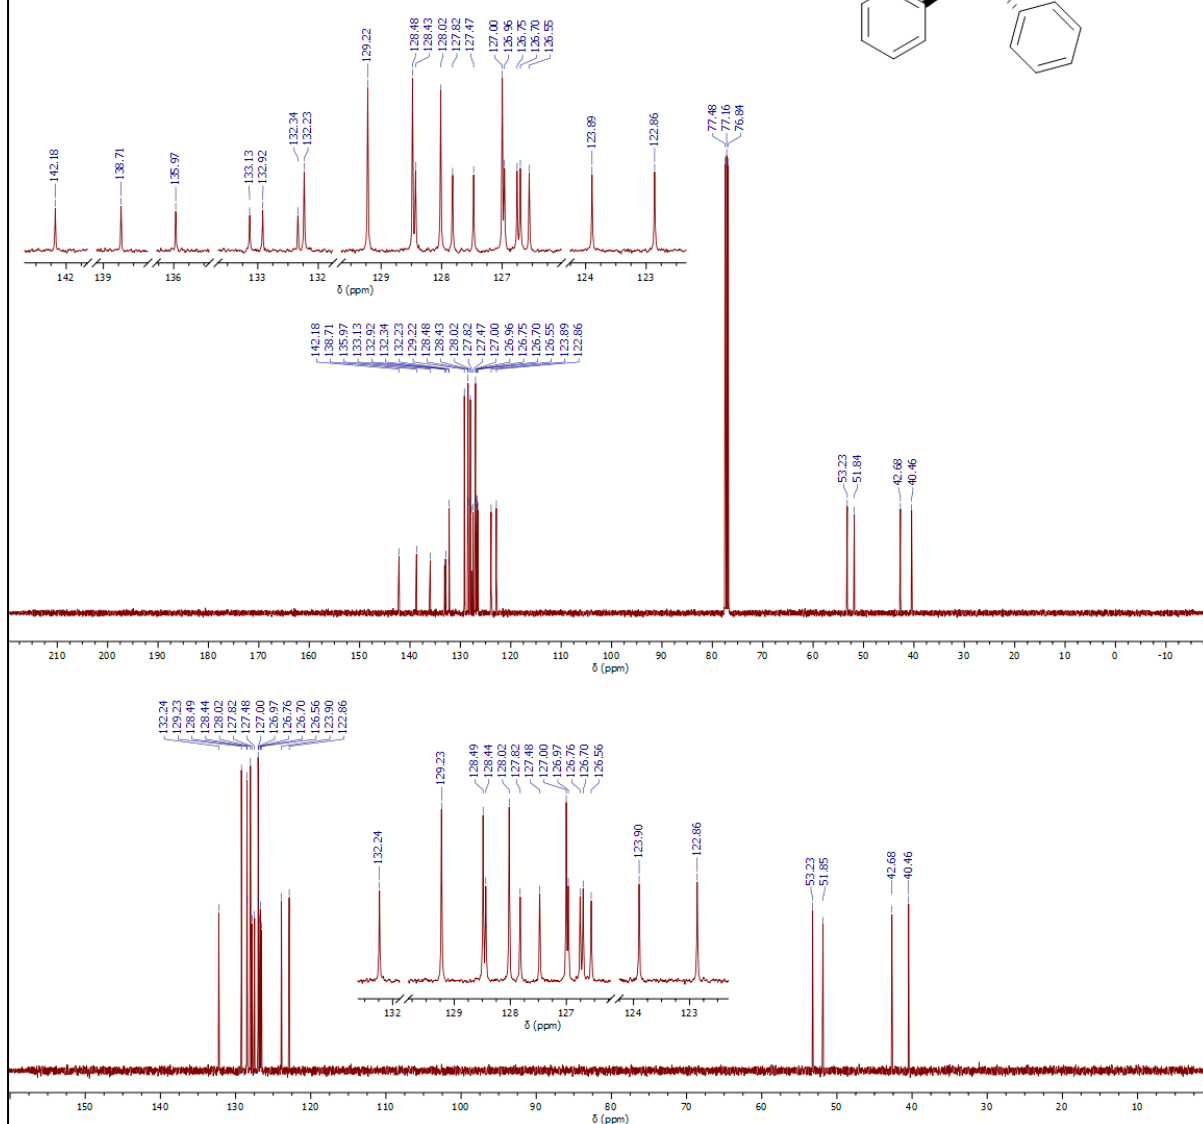

Figure S 79.  $^{13}\text{C}$  (top) and DEPT-135 (bottom) NMR spectrum of (1 $\alpha$ ,2 $\beta$ ,2aR,10bS)-1,2-diphenyl-1,2,2a,10b-tetrahydrocubota[l]phenanthrene (**13**).

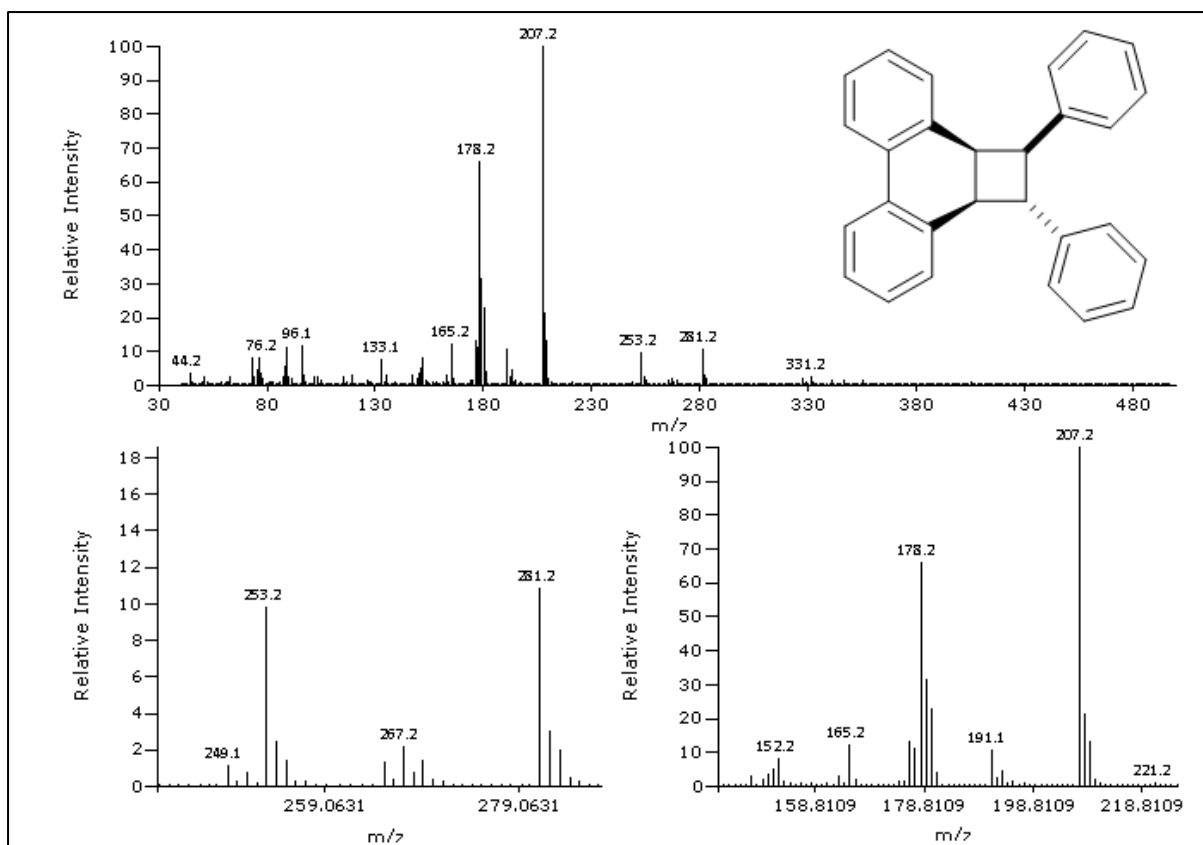

Figure S 80. Electron ionisation mass spectrum of (1 $\alpha$ ,2 $\beta$ ,2 $\alpha$ R,10bS)-1,2-diphenyl-1,2,2 $\alpha$ ,10b-tetrahydrocyclobuta[1]phenanthrene (**13**).

## 5. References

- 1 G. Kaupp and M. Stark, *Chem. Ber.*, 1978, **111**, 3608–3623.
- 2 A. R. Katritzky, X. Wang, L. Xie and D. Toader, *J. Org. Chem.*, 1998, **63**, 3445–3449.
- 3 H. M. Rosenberg and M. P. Serve, *J. Org. Chem.*, 1968, **33**, 1653–1654.
- 4 R. J. Batten and H. A. J. Carless, *J. Chem. Soc. - Ser. Chem. Commun.*, 1985, 1146–1147.
- 5 D. I. Schuster, N. Kaprinidis, D. J. Wink and J. C. Dewan, *J. Org. Chem.*, 1991, **56**, 561–567.
- 6 T. Bally and P. R. Rablen, *J. Org. Chem.*, 2011, **76**, 4818–4830.
- 7 Gaussian 16, Revision C.01 (Gaussian Inc., Wallingford CT, 2016).
- 8 GaussView, Version 6.1.1. (Semichem Inc., Shawnee Mission, KS, 2016).
- 9 C. A. G. Haasnoot, F. A. A. M. de Leeuw and C. Altona, *Tetrahedron*, 1980, **36**, 2783–2792.
- 10 C. a. G. Haasnoot, F. a. a. M. de Leeuw, H. P. M. de Leeuw and C. Altona, *Org. Magn. Reson.*, 1981, **15**, 43–52.
- 11 C. Altona, J. H. Ippel, A. J. A. W. Hoekzema, C. Erkelens, M. Groesbeek and L. A. Donders, *Magn. Reson. Chem.*, 1989, **27**, 564–576.
- 12 L. A. Donders, F. A. A. M. De Leeuw and C. Altona, *Magn. Reson. Chem.*, 1989, **27**, 556–563.
- 13 J. Mattay, A. Banning, E. W. Bischof, A. Heidbreder and J. Runsink, *Chem. Ber.*, 1992, **125**, 2119–2127.
- 14 J. Yang, M. B. Dewal, S. Profeta, M. D. Smith, Y. Li and L. S. Shimizu, *J. Am. Chem. Soc.*, 2008, **130**, 612–621.
- 15 H. Shechter, W. J. Link and G. V.D. Tiers, *J. Am. Chem. Soc.*, 1963, **85**, 1601–1605.

16 R. A. Caldwell, K. Mizuno, P. E. Hansen, L. P. Vo, M. Frentrup and C. D. Ho, *J. Am. Chem. Soc.*, 1981, **103**, 7263–7269.
